# Supplementary material for: Genome-wide discovery and characterization of long noncoding RNAs in African oil palm (Elaeis guineensis Jacq.)
Source: PeerJ. 2020 Nov 2;8:e9585. doi: 10.7717/peerj.9585 (PMC7643553; doi:10.7717/peerj.9585)
Supplement: Supplemental Information 1 [file peerj-08-9585-s001.xlsx]

## Sheet: Table S1
Table S1 Information for SRAs used for FPKM values analysis for lncRNAs and their target genes in African oil palm.
Run	BioProject	Total Bases	Total Reads	LibrarySelection	LibraryLayout	Tissue and stage	Accession/cultivar	reference
DRR053156	PRJDB4476	5584474224	27645912	cDNA	PAIRED	Leaf	Dura	Not available
DRR053157	PRJDB4476	6034048656	29871528	cDNA	PAIRED	Male flower	Dura	Not available
ERR1413765	PRJEB11097	3382207600	16911038	RANDOM	PAIRED	Mesocarp, 100 DAP	Eg type dura of the Deli Dabou origin	Not available
ERR1413766	PRJEB11097	3456788800	17283944	RANDOM	PAIRED	Mesocarp, 140 DAP	Eg type dura of the Deli Dabou origin	Not available
ERR1413767	PRJEB11097	3950735400	19753677	RANDOM	PAIRED	Mesocarp, 120 DAP	Eg type dura of the Deli Dabou origin	Not available
ERR1413768	PRJEB11097	3363818000	16819090	RANDOM	PAIRED	Mesocarp, 160 DAP	Eg type dura of the Deli Dabou origin	Not available
ERR1735779	PRJEB17971	3570000300	19833335	cDNA	PAIRED	Leaf , oil palm seedlings	OPLC1	Not available
ERR3385821	PRJEB33139	6412374254	31744427	size fractionation	PAIRED	Mesocarp, five months	CRI-2S-1	Xia et al., Identification and validation of candidate genes involved in fatty acid content in oil palm by genome-wide association analysis. Frontiers in Plant Science 2019, 10(1263).
ERR3385822	PRJEB33139	5996706330	29686665	size fractionation	PAIRED	mesocarp, five months	CRI-6S-3	Xia et al., Identification and validation of candidate genes involved in fatty acid content in oil palm by genome-wide association analysis. Frontiers in Plant Science 2019, 10(1263).
ERR3385823	PRJEB33139	5998748954	29696777	size fractionation	PAIRED	mesocarp, four months	CRI-8S-4	Xia et al., Identification and validation of candidate genes involved in fatty acid content in oil palm by genome-wide association analysis. Frontiers in Plant Science 2019, 10(1263).
ERR3385824	PRJEB33139	5625249944	27847772	size fractionation	PAIRED	mesocarp, five months	CRI-13S-16	Xia et al., Identification and validation of candidate genes involved in fatty acid content in oil palm by genome-wide association analysis. Frontiers in Plant Science 2019, 10(1263).
ERR3385825	PRJEB33139	5553780526	27493963	size fractionation	PAIRED	mesocarp, four months	CRI-14S-7	Xia et al., Identification and validation of candidate genes involved in fatty acid content in oil palm by genome-wide association analysis. Frontiers in Plant Science 2019, 10(1263).
ERR3385826	PRJEB33139	6387841152	31622976	size fractionation	PAIRED	mesocarp, five months	CRI-16S-12	Xia et al., Identification and validation of candidate genes involved in fatty acid content in oil palm by genome-wide association analysis. Frontiers in Plant Science 2019, 10(1263).
ERR3385828	PRJEB33139	5424759692	26855246	size fractionation	PAIRED	mesocarp, five months	CRI-17S-13	Xia et al., Identification and validation of candidate genes involved in fatty acid content in oil palm by genome-wide association analysis. Frontiers in Plant Science 2019, 10(1263).
SRR5189966	PRJNA305816	3394212480	18856736	RT-PCR	PAIRED	Female inflorescences, +6 leaf stage	Tenera	Not available
SRR5189969	PRJNA305816	3504724200	19470690	RT-PCR	PAIRED	Female inflorescences, +15 leaf stage	Tenera	Not available
SRR7812013	PRJNA490055	6816504000	25035092	RT-PCR	PAIRED	Root, Juvenile tree (3 months)	DxPSocfindo Yangambi	Not available
SRR7812014	PRJNA490055	7510527600	22721680	RT-PCR	PAIRED	Root, Juvenile tree (3 months)	DxPSocfindo Yangambi	Not available
