# Supplementary material for: Genome-wide discovery and characterization of long noncoding RNAs in African oil palm (Elaeis guineensis Jacq.)
Source: PeerJ. 2020 Nov 2;8:e9585. doi: 10.7717/peerj.9585 (PMC7643553; doi:10.7717/peerj.9585)
Supplement: Supplemental Information 2 — A total of ten samples were tested, including oil palm root, stem, spear leaf, female flower, kernel and six developing stages of mesocarp (8-week-old, 12-week-old, 16-week-old, 18-week-old, 20-week-old and 24-week-old). Positive represent the primer pair produce positive band in at least one tested samples; negative represents no bands were produced in the tested samples. [file peerj-08-9585-s002.xlsx]

## Sheet: Table S2a
Table S2a Primers used for RT-PCR for lncRNAs and their predicted target genes. A total of ten samples were tested, including oil palm root, stem, spear leaf, female flower, kernel and six developing stages of mesocarp (8-week-old, 12-week-old, 16-week-old, 18-week-old, 20-week-old and 24-week-old). Positive represent the primer pair produce positive band in at least one tested samples; negative …
Gene name	Primer sequence	Amplicon (bp)	SS-RNAseq FPKM	FPKM from NCBI SRAs						RT-PCR results*
				mesocarp	kernel	leaf	pollen	flower	root
MSTRG.48560	CGATGTCGGCTCTTCCTAT	176	72.7702	8914.24	0	83034.2	0	1.0717	5.69443	positive
	TGTGAATCAATGGTTCCTCTC
MSTRG.42622	CCTTTGACTCTTCCACGG	160	15.3335	18.5937	4.81721	17.6357	0	1.38747	0	positive
	AGGGTAAGCGGTATTTCG
MSTRG.32440	GTTGAGAGCGGGAGGTGTTC	163	14736.8	4.31478	3.50342	92.756	61.9788	9.02037	1.76183	positive
	CCTTTGGGTCTGGGTGTAATG
MSTRG.26953	ATCCCAAGTCCAACTCCATACA	229	33.4777	207.885	47.9773	102.002	0	136.161	100.689	positive
	CGCAAGATAGACCCAGATACAAT
MSTRG.4577	CCAGTTAGAGTTGGGCAAAATAGT	278	41.9168	217.603	135.094	257.813	202.595	268.555	187.375	positive
	CTGTGGTTAGAGGCTGTGATGAT
MSTRG.53207	GAACCTCCCTCCTAATCCAAGT	292	40.2707	15.361	11.3075	5.77627	1.07271	28.8645	2.37357	positive
	GGAAAGAGTTTATGCTGCTGCTA
MSTRG.49197	TGACTTGTCGGTGCGTGTG	203	0.358716	3.71057	13.5033	12.9367	0	19.7302	0	positive
	CCCTTTTGACCCCTGTGTT
MSTRG.48430	TAACCAAGGAGTGTGGAGAC	236	0.400223	12.4566	35.5804	22.6614	0	17.7778	0	positive
	TGACTGTGCCCAGAAGCC
MSTRG.52384	CACGGTGGTAGAGGCAGAA	92	1.2208	26.6058	4.4043	1.97131	0	2.97135	0	positive
	AATGGAGGTCAGGGAGCAG
MSTRG.9572	GACGAACCGCATGATTAG	135	3.29852	NA	NA	NA	NA	NA	NA	positive
	ACCCGTGAGAAGGTGAAC
MSTRG.21994	CGCATTTCTGTCCCTTGGT	164	4.89896	NA	NA	NA	NA	NA	NA	positive
	TGGCATTCTAACGAGGATTCTA
MSTRG.34109	TCGGAAGAAGAAGGAAGAGAAC	276	26.0377	112.261	187.962	165.328	0	41.7941	97.8878	positive
	GAGGGATGGGATGGTGGA
MSTRG.51478	GCATCAACCTCAGGCACATT	217	17.01	6.44792	0	0.72682	0	14.4412	1.24258	positive
	AGGGGACTTTTGCTTCTTCATA
MSTRG.7370	ATGGGGCACTTGGATGATG	199	0.833009	NA	NA	NA	NA	NA	NA	positive
	TCCTCCCTTCTCTTGCTTGTC
MSTRG.10334	GCCATCGCATCCAATACAG	146	3.12953	NA	NA	NA	NA	NA	NA	positive
	GACTTGCCCACCTTCCTTC
MSTRG.13617	TGACTACTGAATAGATAAGGAAAACCA	184	7.09838	NA	NA	NA	NA	NA	NA	positive
	CTAATCACAAACTCAACGAAGACC
MSTRG.8209	ACCGTGGACCAGAGGACTT	236	1.89181	596.794	10.2683	209.846	0	30.1592	54.7683	positive
	TTATGCTGCCGCTTATTTTAG
MSTRG.24786	GTAATCAATCACCTCTTCTCAAAAA	196	0.973991	NA	NA	NA	NA	NA	NA	positive
	GCTTCTCCTCCTTCTCATACTTCT
MSTRG.36586	GAGGCATTTGGCTCTGGTAG	219	1.03816	NA	NA	NA	NA	NA	NA	positive
	TTGAAAGGAGAAGGGAGAACAT
MSTRG.952	TGAAGTTGCTCTTTTCGGTCTC	263	2465.88	14021.7	31.4917	253.349	23.5532	343.691	117.585	positive
	GAAGCGTGTGGGCTCTGC
MSTRG.48470	GGGGGAGTCAGAAGGGG	159	49.2282	86.0639	0	5516.43	24.198	8.49892	0	positive
	CGCAGCCAACTGTCGGT
MSTRG.14569	TCCTGGCATTTGATTTCCTTC	153	12.6528	348.466	916.899	806.603	4631.79	944.02	709.531	negative
	CTCATTCAGCCTTTTGATTGGT
MSTRG.10373	GATGAAGAAGGCACTGAGCA	175	22.0279	57.3051	299.589	93.5928	110.722	57.0016	76.6217	negative
	GAGGTGTGAACAGCGTAAATA
MSTRG.11762	GATGCCCTCACAACCCTAA	193	0.431756	NA	NA	NA	NA	NA	NA	negative
	CTCTTTCCGTGTCTTTTCCA
MSTRG.12173	TTTCGTCAGTTCCATCCCC	209	6.06394	61.0478	47.9233	189.748	62.4338	32.4038	134.275	negative
	TCTTCATCACCAAGTTAAGCAAT
MSTRG.13913	CCGCCAGAGTAAAGGATTGC	195	4.43415	467.368	260.558	734.168	0	149.783	614.685	negative
	AGGTGGAGGATGGGTTGTGA
MSTRG.15295	CACAGGAAGTGGAGCAGGG	252	1.19798	138.295	0	3.3194	0	0	0	negative
	CAACGACTACAGCCGCAAG
MSTRG.16071	TGCGGGCGTAGGAGATG	131	1.59828	NA	NA	NA	NA	NA	NA	negative
	CCCAGCCTTTTCACAGACC
MSTRG.17188	GGAGCGTGATGATGTTGTAATG	201	29.3742	0	207.015	50.0869	0	18.585	0	negative
	ATGTGAGCAGGGTAAGGGTAAA
MSTRG.17699	TCAATGACAAATAGTAAGGAGAGGA	218	0.202302	NA	NA	NA	NA	NA	NA	negative
	AATCAGTAAAATGGTAGACAAGCC
MSTRG.17903	ATGCCACCCAGATGCTTTC	190	8.46443	98.0142	57.3137	278.351	16.0605	158.305	87.4116	negative
	TCAATCCGCTTCTCAATGCT
MSTRG.17965	CCATTCATCTCCCATCGTCTT	200	0.928413	NA	NA	NA	NA	NA	NA	negative
	CACCCCCATTTACACCAACA
MSTRG.18737	TCTTTGTGCTTTTTGGAGGAG	206	0.885347	NA	NA	NA	NA	NA	NA	negative
	TTATCGGGAACATTATTGGGTA
MSTRG.19796	GTCGTGTAGGAGTCTCGTCGTC	173	0.722122	416.028	0	166.052	0	85.7762	257.721	negative
	TTATGGTCTTTGGCTTTCTTGG
MSTRG.21389	ATGGGTTGCTTATTGGAG	281	0.499466	NA	NA	NA	NA	NA	NA	negative
	TGGATGGGATGTATGAGTG
MSTRG.21491	TCTTTTCATTTCTTTCCGTTTTT	150	1.09025	NA	NA	NA	NA	NA	NA	negative
	CACCTCCTCCCTACTGTCCTC
MSTRG.22548	ACTTCCGACGACGACACCT	185	0.868402	NA	NA	NA	NA	NA	NA	negative
	CGATTCCGCCAGACAGAC
MSTRG.22651	AAATACTGTTTATGAAGTTGGAT	229	0.517207	NA	NA	NA	NA	NA	NA	negative
	CAGAAGCATTGCGTGAA
MSTRG.22677	CGGAGGTGGTGCCTGTAA	152	7.65799	NA	NA	NA	NA	NA	NA	negative
	CGAGGGAGGAAGAGGAGAG
MSTRG.23421	GGGGTGCTTGTTGAATGTA	125	3.09572	NA	NA	NA	NA	NA	NA	negative
	ACCTCCTTCCCACTATGCT
MSTRG.24528	CAGAAAAGGTGGAAGGAACATC	151	0.147534	NA	NA	NA	NA	NA	NA	negative
	GTCGTCGCCAAGGAGGG
MSTRG.24982	CGCTGATGAAGAAAACTGGAG	162	0.226851	124.821	293.994	132.918	0	100.165	72.6724	negative
	AGCAAGCCCGAAAGGAAC
MSTRG.27795	GTTGTGAGAGGAGGATTTTGGA	163	0.876584	NA	NA	NA	NA	NA	NA	negative
	TGCGAGGTATCTTTGAAGGTGA
MSTRG.30650	GGAAGCAACAGGGGTGGTC	218	0.515462	NA	NA	NA	NA	NA	NA	negative
	GTTTAGGGTCGTAGGGTTAGCG
MSTRG.31835	CCCTTTCCTCCCAACTCCT	149	0.193533	NA	NA	NA	NA	NA	NA	negative
	CAACTCGCCTCCCGTCAC
MSTRG.34112	GTGATAGGAACTACAAGAAGGCTC	164	0.257911	0	17.3532	0.597398	0	0	94.7032	negative
	GGTCCCGTTTTGGTCTGATA
MSTRG.34163	GGGGGTGGAGTAGAAGCAGA	122	0.159877	NA	NA	NA	NA	NA	NA	negative
	GGAGATTCGTCCTTTGATGG
MSTRG.35147	CCACAACAAAGGATAAAAATAGTA	173	1.32462	275.946	60.7295	337.962	202.142	332.348	47.1823	negative
	GCAGAGGAGGATGGAGCAG
MSTRG.36289	GGCTTCTCTTCCAACCATCC	248	42.2637	NA	NA	NA	NA	NA	NA	negative
	CATCAGTTTCTCAACCCTCTCCT
MSTRG.36391	TCCGATCCCACGATTGCC	203	2.79563	NA	NA	NA	NA	NA	NA	negative
	GCCAGCGTTCTCCTTGCC
MSTRG.37370	GACCAACTCACACCACCACAAC	204	43.6071	11.5124	18.6281	31.4095	7.77827	22.9808	15.0045	negative
	GAAAAACTGGGGGAACATAGGA
MSTRG.37576	CGCTGAAGGGGAACGCC	180	0.832423	NA	NA	NA	NA	NA	NA	negative
	CATCCGACCACCACCGAG
MSTRG.41128	TTTTGCCGTTGACAGTTG	150	1.61123	NA	NA	NA	NA	NA	NA	negative
	GTTTTGCGAGCATTGAGA
MSTRG.41878	CAATGATGGGGTAAGAGTGG	189	21.2104	17.0098	1.4334	51.6193	0	37.5268	1.76247	negative
	GTGCTAATGTCCGTTTATGCT
MSTRG.43006	CCACCTAACTAATCCCACCCA	191	0.154009	NA	NA	NA	NA	NA	NA	negative
	GGAGGAAGGCATCACGACAC
MSTRG.45439	CATTCCTCCGTGTCGTGG	149	0.238301	16.0283	0	5.25683	0	2.7205	0	negative
	GCCCCCCTCAGTGCCTC
MSTRG.4578	GCGAATGACATCCAACAGTG	222	26.9787	11.9389	63.351	28.1765	190.746	41.0159	48.6145	negative
	GCTTATTAGCAGTGCAGAGAAAAC
MSTRG.53370	GGAGGCACAGGGGAGTCG	227	18.7317	82.2346	114.746	51.0814	89.8012	51.7765	132.173	negative
	GGTGGAACCAAGAAAGGAATG
MSTRG.49166	TCAATCCGCTGCCTCCTC	151	2.82782	141.194	17.186	26.771	0	38.483	10.3055	negative
	AGACCCTCCGACGCTCAA
MSTRG.52125	ATCCAATATGTTGCGGAAATC	210	26.1257	18.6013	0	7.97665	0	5.12368	8.4325	negative
	AGCAGGGAATGTGTAAGACGA
MSTRG.52244	GTGGCAACTACCTGGGCTCC	246	23.1754	6.02422	2.04396	0.759387	0	0	0	negative
	CAAAAATAAATCTCTCGCTGGCTC
MSTRG.15884	TTCCTCTACCTTTTGTTGTTTTC	194	20.5215	14.6	18.136	6.62559	0	8.6515	15.4899	negative
	TTGGTTATATACCTGATGGGCT
MSTRG.5607	CAGAGAAAGGTAAACTGTGGGTG	236	2.82255	NA	NA	NA	NA	NA	NA	negative
	GCTGATGGCTAAAAGCGGTA
MSTRG.6536	CTCATCTTCACCATCAGCAGC	106	0.162765	NA	NA	NA	NA	NA	NA	negative
	TAGAGGAACATCAAAGGATACCC
MSTRG.6726	ACAAAAATAGTTCCTCCCCAG	240	1.00212	3.74344	0	7.23552	0	0	0	negative
	AAGAGATGACCGCCCCAA
MSTRG.7343	TCGTAGTCGGTTCCGCTGA	116	0.442059	57.9891	3.75168	10.132	0	0	19.3423	negative
	CTGTGCCCATCTCTCTTTCTGTA
MSTRG.7397	TCCAAGGCATAATGTTCC	172	87.5629	32.6763	2.23856	4.44359	0	12.1372	5.68584	negative
	AGAGATTTTTCTGTTCTACGG
MSTRG.7727	GCCTCGTTCCCTTCTCCAG	163	9.02291	220.976	327.134	244.502	1277.78	297.701	726.304	negative
	TGAATCGTAGTCAGACGCTCG
MSTRG.8102	ATTGGAAGAGGGTAGGAAA	144	0.284166	NA	NA	NA	NA	NA	NA	negative
	TGGAGGAAGGTTGAGGTG
MSTRG.33179	TCTTTGCTGCTGGTTTGCC	208	47.4179	48.3481	0	23.9619	0	18.9946	2.57956	negative
	GCTTTTCTTAGTCTTCTGTTGCGT
MSTRG.13612	ATAGTCTTGTCGGTTACCTCAT	177	359.694	NA	NA	NA	NA	NA	NA	negative
	GATTCCAACTCTTAGTACATAGCA
Actin	GTTGTCGCTCCACCCG	119	-	-	-	-	-	-	-	positive
	GCAGGACCACATTTCATCATCATA
"NA" represents that lncRNAs produced overlapped transcripts with antisense gene or flanking gens and no correct FPKM values were derived from NCBI SRAs.
