# Supplementary material for: Genome-wide discovery and characterization of long noncoding RNAs in African oil palm (Elaeis guineensis Jacq.)
Source: PeerJ. 2020 Nov 2;8:e9585. doi: 10.7717/peerj.9585 (PMC7643553; doi:10.7717/peerj.9585)
Supplement: Supplemental Information 3 [file peerj-08-9585-s003.xlsx]

## Sheet: Table S2b
Table S2b Primers used for RT-PCR analysis of lncRNAs and their corresponding target genes in oil palm root, stem, spear leaf, female flower, kernel and six developing stages of mesocarp (8-week-old, 12-week-old, 16-week-old, 18-week-old, 20-week-old and 24-week-old).
lncRNA	Primer sequence (5′–3′)	Amplicon (bp)	Target gene	Primer sequence (5′–3′)	Amplicon (bp)
MSTRG.9572	F-GACGAACCGCATGATTAG	135	LOC105041276	F-GCGGTTCGTCATAGTAGTAGAT	164
	R-ACCCGTGAGAAGGTGAAC			R-GAAGAAAAATAGCCACAGAGTT
MSTRG.24786	F-GTAATCAATCACCTCTTCTCAAAAA	196	LOC105051990	F-TAAGATAGAGGAAGAGATTGCTGC	249
	R-GCTTCTCCTCCTTCTCATACTTCT			R-CAAAATACATCACGCTAAACACC
MSTRG.48560	F-CGATGTCGGCTCTTCCTAT	176	LOC109505170	F-CGGTATTTAGCCTTGGACAGA	175
	R-TGTGAATCAATGGTTCCTCTC			R-TGGAGAAGCATCCTCATCG
MSTRG.13617	F-TGACTACTGAATAGATAAGGAAAACCA	184	LOC105044117	F-GAAGCGTGATGGAAACAGT	202
	R-CTAATCACAAACTCAACGAAGACC			R-TGCTACCTAAAAGGGAGTGG
			LOC105044074	F-CCCACCAAAAACAACGAC	240
				R-CTTATCTTGCTTGAACCAACTAC
