# Supplementary material for: Genome-wide discovery and characterization of long noncoding RNAs in African oil palm (Elaeis guineensis Jacq.)
Source: PeerJ. 2020 Nov 2;8:e9585. doi: 10.7717/peerj.9585 (PMC7643553; doi:10.7717/peerj.9585)
Supplement: Supplemental Information 4 [file peerj-08-9585-s004.xlsx]

## Sheet: Table S3
Table S3 The contents of different fatty acids and oil in 160 oil palm individuals.
Oil palm individual name	Relative content of different fatty acids (%)																Oil contents (%)
	lauric acid		myristic acid		palmitic acid		tripalmitelaidin acid		Hexadecadienoic acid		stearic acid		oleic acid		linoleic aicd
	mean	SD	mean	SD	mean	SD	mean	SD	mean	SD	mean	SD	mean	SD	mean	SD	mean	SD
12N-1	0.0679459	0.00833145	0.723512	0.096247	42.337	1.45648	0.159303	0.0120293	0.0280522	0.00241486	4.16663	0.29642	36.5658	2.01121	11.9585	1.08696	0.474179	0.0311871
13S-16	0.0491959	0.00641471	1.36437	0.197958	42.2259	1.97876	0.186182	0.0149264	0.0223945	0.00115635	3.49128	0.0877469	39.996	3.10309	9.94493	1.14034	0.567316	0.00665001
13S-9	0.0578607	0.0114693	0.951752	0.042882	37.4768	0.398464	0.127444	0.00218791	0.0184881	0.00317597	4.82109	0.425796	42.845	0.353705	10.4392	0.614131	0.560958	0.0123758
14N-1	0.0731472	0.0626988	0.728818	0.0669612	38.8534	2.00552	0.121351	0.0191481	0.0303944	0.00559933	4.51969	0.291352	38.8024	1.30308	10.6448	0.732477	0.447567	0.0185686
14S-10	0.0348063	0.00541665	1.02812	0.0475751	39.8492	0.499845	0.15601	0.00768135	0.0218038	0.00392225	3.84168	0.0776584	42.0911	0.940878	9.6808	0.508267	0.531827	0.0372019
14S-2	0.0534144	0.00949405	1.04445	0.0832091	42.2877	1.19368	0.165285	0.0103529	0.0230026	0.00242832	3.90197	0.339701	37.0765	1.25544	11.6024	0.963652	0.581649	0.0232078
14S-4	0.0451409	0.00965409	1.50635	0.263792	42.868	0.866167	0.148576	0.0174551	0.0241142	0.00345362	4.20085	0.457861	39.6635	1.37653	8.65176	0.0397673	0.610554	0.00216339
15S-18	0.0286842	0.00215353	0.838541	0.0255628	38.0526	0.831744	0.176826	0.0156213	0.0285094	0.00199788	3.74946	0.335796	45.6027	1.29139	8.3265	0.250263	0.570887	0.0151956
15S-7	0.0311428	0.0025344	0.560601	0.166141	38.445	2.20946	0.106204	0.0178185	0.0189613	0.000830575	6.07727	0.439668	36.8968	0.578499	14.3571	1.08169	0.588	0.0413732
16N-3	0.0256309	0.00173216	0.9387	0.108073	40.0831	2.98453	0.140328	0.0175932	0.0246984	0.00270637	3.58073	0.187351	40.7147	2.39981	10.9034	1.13424	0.580598	0.0365019
17S+3	0.020909	0.00278853	0.554531	0.149405	33.4348	0.229221	0.0775351	0.00918838	0.0255999	0.00272945	6.7272	0.570786	37.8468	1.66185	16.3569	1.91542	0.532124	0.027883
18N-3	0.0308161	0.00150889	1.27229	0.0462639	43.1488	0.908163	0.135364	0.00813414	0.0273234	0.000668668	3.90944	0.0101262	38.748	1.26364	8.98187	0.144105	0.510363	0.0251941
18S-16	0.0262617	0.000854031	0.938116	0.0669859	38.3982	0.0514477	0.106467	0.021665	0.0215926	0.000971258	6.09324	0.534051	34.5859	1.11514	16.2209	1.75171	0.531853	0.0233147
18S-9	0.0311639	0.00409179	1.23373	0.0582703	45.4978	0.0524828	0.19096	0.00987468	0.0229783	0.000979501	3.13738	0.0873275	30.0865	0.296684	15.7709	0.214646	0.570882	0.0317175
19N-1	0.0446347	0.00776036	0.889036	0.160431	40.4048	0.628454	0.215495	0.00852253	0.026891	0.00226204	3.17114	0.0834303	44.6298	1.15659	7.13605	0.549103	0.463659	0.0138793
20S-14	0.0257056	0.00453537	0.70754	0.0565807	40.738	1.41915	0.150349	0.00348325	0.0194613	0.00239642	3.99527	0.061156	40.521	0.175382	9.72279	0.429868	0.411731	0.01453
20S-3	0.0211225	0.00273642	0.651672	0.0722369	38.1814	0.636873	0.107756	0.00614138	0.0183842	0.00207538	5.967	0.48135	36.1861	1.0993	15.8382	0.707957	0.579781	0.0362376
6S-3	0.0316145	0.00463715	1.0838	0.131101	43.5279	1.61067	0.158566	0.0210174	0.0195713	0.00162552	5.0145	0.533985	33.1946	1.75411	13.4338	1.19847	0.567278	0.0347075
12S-14	0.0370572	0.00686033	1.16932	0.180285	41.1552	0.963856	0.113729	0.00184788	0.0180335	0.00022049	5.4667	0.294998	38.7206	1.03646	10.68	0.158237	0.640346	0.0475515
12S-16	0.059781	0.00306395	0.861004	0.0193894	39.4636	1.99492	0.130296	0.0088102	0.0203792	0.00240942	4.90738	0.18212	40.458	1.45232	10.6756	1.21672	0.553024	0.0196673
12S-17	0.0279402	0.00950145	0.872618	0.124675	45.2472	0.197286	0.166898	0.0109791	0.022318	0.00213523	3.57564	0.181263	34.6883	1.04662	12.5074	0.876565	0.581034	0.046195
12S-24	0.038552	0.00125467	1.34878	0.0881338	40.8943	0.97615	0.115818	0.0148934	0.0205811	0.00242864	4.81009	0.435222	40.3026	1.42704	9.55047	0.620343	0.553428	0.0128324
12S-4	0.0286842	0.00203373	1.11488	0.0644177	40.7152	0.965023	0.121228	0.00340182	0.024331	0.0021292	4.48975	0.0917655	41.3394	1.22883	8.97377	0.426021	0.474495	0.012031
10S-2	0.0269402	0.00123824	1.06436	0.066355	40.3434	0.694496	0.158854	0.00868424	0.0230675	0.00223128	4.02729	0.0958159	41.3359	0.591604	10.0004	0.1855	0.524227	0.040556
10S-3	0.0365994	0.00429499	1.11524	0.0715716	41.8748	0.699592	0.189534	0.0101138	0.0186882	0.00442311	3.68987	0.139983	41.9281	0.156757	7.67429	0.567488	0.501431	0.00336224
11S-12	0.0451108	0.00682474	0.79203	0.141043	40.334	1.91492	0.142717	0.0265813	0.0256338	0.00412798	4.1077	0.269905	40.7793	2.98516	11.5245	1.10416	0.568969	0.0192002
11S-13	0.0248134	0.00219794	0.877629	0.0683136	36.8099	0.885158	0.111896	0.0119891	0.0229691	0.000599018	5.63093	0.0642362	42.1432	2.28176	10.3062	1.41263	0.580668	0.0186494
11S-18	0.0352741	0.00466258	0.9785	0.159193	42.7489	0.362991	0.199065	0.00961209	0.0219209	0.00540631	3.278	0.306222	38.646	0.71946	9.8763	0.41952	0.539904	0.022772
11S-19	0.0235832	0.00146472	0.698827	0.0133405	41.0985	0.0421393	0.188008	0.0213744	0.0252102	0.00252717	3.39025	0.124004	40.4996	0.768034	10.206	0.365683	0.557913	0.0381614
11S-2	0.0417956	0.00355791	1.32221	0.150534	43.7084	1.26555	0.209287	0.0195015	0.0215863	0.00327446	2.98219	0.262337	36.4143	2.0883	10.0615	0.449682	0.530749	0.0123694
11S-3	0.0407055	0.0129649	1.15211	0.153007	43.0318	0.961254	0.14687	0.022166	0.0203838	0.00504857	3.99254	0.405803	38.7256	1.28863	10.3365	1.05014	0.580298	0.0305287
11S-4	0.0352897	0.000950097	1.17272	0.162599	39.621	1.47111	0.121641	0.012564	0.0202147	0.00238504	4.96561	0.526728	41.4519	1.36601	8.93685	1.46848	0.627236	0.0176118
11S-7	0.0316759	0.00204207	1.0135	0.091212	42.2275	2.09166	0.151592	0.0198324	0.0238791	0.00167766	4.4872	0.378445	38.8959	2.15844	9.71511	0.552565	0.688904	0.0625777
12S-21	0.0277237	0.00519173	0.961507	0.225486	28.4483	24.549	0.079621	0.0588549	0.0139695	0.00202003	15.1907	16.5873	27.0992	11.1604	10.1577	6.57363	0.541598	0.0755327
12S-22	0.026299	0.00384684	0.964111	0.112738	40.621	0.969163	0.166721	0.0179085	0.0254542	0.00138836	3.77339	0.368139	41.376	1.41658	9.93773	0.881018	0.592133	0.0215667
12S-5	0.0582748	0.00143848	0.901731	0.0833369	42.8609	0.757096	0.258165	0.0165142	0.0206825	0.00146147	2.80737	0.0640739	38.1228	1.07988	11.3859	0.428064	0.566533	0.0288312
12S-6	0.0210767	0.00177153	0.613645	0.0509599	39.3925	1.26629	0.121436	0.0139291	0.021784	0.00383003	4.57221	0.343005	44.8573	0.862682	7.16827	0.617683	0.507558	0.0221787
12S-7	0.0179289	0.00244403	0.752811	0.100543	39.4103	1.35476	0.0919485	0.00788667	0.0204189	0.00794774	5.66665	0.469762	41.2782	0.336838	9.44346	0.439024	0.511133	0.0202854
13S-12	0.0449679	0.000700344	0.533124	0.0201726	36.0622	0.265727	0.113719	0.00951255	0.0229397	0.000749383	5.78494	0.255454	44.2827	0.618307	9.97025	0.45544	0.594268	0.0190583
13S-13	0.0415037	0.00997224	1.0673	0.259588	40.2553	2.58009	0.142925	0.0378842	0.0270337	0.00760142	5.01976	0.8101	38.7877	2.72995	11.6061	1.23549	0.617921	0.0281604
14S-19	0.0201726	0.00174356	0.662046	0.0814201	40.4879	0.359687	0.166593	0.0136665	0.017954	0.00197438	4.08463	0.261627	36.0229	0.981987	14.1818	0.121356	0.520454	0.0149878
4S-2	0.0283291	0.00326762	0.809985	0.103077	42.6408	0.872913	0.188489	0.0187553	0.0175253	0.00241515	3.57554	0.22505	39.2531	0.698413	9.75884	0.074203	0.483836	0.00179504
4S-3	0.0259018	0.00059403	0.732298	0.163854	40.3872	3.72409	0.168499	0.0485389	0.0217054	0.00933933	4.0578	0.7647	42.5457	2.58672	8.45505	0.465874	0.498639	0.00755224
15S-21	0.020935	0.000148008	0.587333	0.0357991	38.7421	1.59786	0.145195	0.0100596	0.0304892	0.00332722	4.14211	0.268034	43.808	1.86212	9.32893	0.814995	0.566626	0.0605474
15S-22	0.0373077	0.00126373	0.964702	0.177911	43.3324	2.19169	0.139053	0.00443474	0.0263277	0.00120534	4.76215	0.318718	39.16	1.33211	8.41812	0.725736	0.540951	0.0111769
15S-3	0.0264286	0.00154126	0.475997	0.0652819	39.906	1.66344	0.127667	0.00246828	0.0306106	0.00380774	4.37425	0.211889	42.7366	1.47612	9.59184	0.785848	0.591804	0.00525239
17N-3	0.0242259	0.00224039	0.923785	0.162602	45.1564	1.29751	0.207014	0.0240712	0.0256003	0.00676112	3.33275	0.18267	36.9653	2.19374	9.97841	0.813916	0.654091	0.0880667
9S-1	0.0266631	0.00176199	0.747163	0.0875695	39.0845	1.84879	0.179986	0.0260153	0.0191844	0.00496049	3.69864	0.161757	43.7645	1.4154	9.47724	1.0278	0.53745	0.0106336
9S-2	0.0358731	0.00397415	1.15096	0.212441	41.3577	1.49779	0.200502	0.0106709	0.0252509	0.00491069	2.84669	0.0714498	42.2677	1.96694	8.51644	0.704535	0.542408	0.0336499
12S-8	0.0341316	0.00354745	0.907058	0.0470367	41.8766	1.43837	0.136139	0.00408364	0.0324926	0.00278138	4.98337	0.164473	38.1802	1.15212	10.8591	0.582789	0.57558	0.0189055
13S-10	0.0447377	0.00297716	0.652469	0.0692836	37.4419	0.890905	0.136482	0.00168554	0.0199304	0.00186666	4.30267	0.21368	42.7205	1.02265	11.2008	0.0810765	0.474018	0.0219372
13S-20	0.0426547	0.00466069	1.33018	0.160578	42.5307	1.68882	0.160733	0.0224813	0.021553	0.00167194	4.22242	0.243031	38.6827	2.57542	9.88388	0.941923	0.577609	0.0526594
13S-21	0.0681112	0.00579551	1.42111	0.144078	43.5346	0.217488	0.190326	0.0220342	0.0179534	0.00658873	3.14462	0.123193	37.8236	0.390187	10.9003	0.359181	0.54839	0.0222616
13S-3	0.0607283	0.00418187	0.750706	0.607353	41.6779	2.18476	0.163647	0.0265536	0.0159226	0.00168496	4.16709	0.316387	38.5065	1.51014	11.2189	0.17626	0.573924	0.0332355
13S-4	0.0281597	0.00349887	0.884051	0.0355224	38.0316	0.787882	0.133385	0.0218751	0.0271973	0.00486927	4.90256	0.160462	43.9283	0.771303	9.2661	0.342794	0.585617	0.0268457
13S-6	0.0287116	0.0100335	1.05049	0.287097	40.6894	3.01584	0.167356	0.0464716	0.0201514	0.00566296	4.22497	0.933651	37.2371	2.43792	12.4301	1.98899	0.530434	0.0192163
13S-8	0.0690477	0.0030832	1.31988	0.175239	42.4962	2.5346	0.121043	0.0156147	0.0184271	0.00166745	4.70428	0.449554	38.3987	2.74281	8.22535	0.517706	0.510258	0.0374779
14S-20	0.0304103	0.003663	0.538305	0.0804869	38.0128	1.28641	0.13665	0.0232842	0.0217029	0.00250413	5.51656	0.353967	41.3779	0.561971	11.2653	0.379691	0.542909	0.0742049
14S-21	0.0327435	0.00459746	1.27313	0.0440249	45.1779	1.83578	0.175539	0.0361829	0.0164334	0.00112959	3.77415	0.463999	32.3026	2.00618	13.4911	1.07037	0.621359	0.0234763
14S-9	0.0283697	0.00550203	0.958523	0.156059	42.2635	1.35743	0.19798	0.00723166	0.0290801	0.00649526	3.08246	0.0728458	40.2494	1.96741	10.269	0.509968	0.587767	0.0378173
15N-1	0.0407492	0.0039386	0.680371	0.113339	43.7131	0.908879	0.180409	0.00951209	0.0266433	0.00593634	3.27029	0.0730141	38.6034	1.22922	11.1821	0.453087	0.413459	0.0144301
15N-3	0.0443483	0.0229912	0.813392	0.0636843	41.1125	1.79043	0.187548	0.0152377	0.0250408	0.00284735	3.58146	0.376583	40.9687	0.831067	9.13792	0.79485	0.4721	0.0282447
11N-1	0.0492152	0.0309843	0.884894	0.215703	39.4188	3.0308	0.165862	0.0225105	0.0265391	0.00529854	3.71265	0.43051	42.7456	3.61133	9.30372	0.759971	0.573953	0.0295243
11S-1	0.0334728	0.00484062	0.847381	0.0710939	38.9391	0.904072	0.141282	0.0074306	0.0171791	0.00190675	4.27721	0.0994219	42.3115	1.19775	9.30108	0.600327	0.397337	0.0169645
11S-10	0.0285996	0.00276302	1.03736	0.17589	40.9467	0.929553	0.189877	0.0100331	0.0220332	0.00223765	3.42118	0.216299	41.8549	1.95858	8.94293	0.992853	0.608517	0.0522037
11S-15	0.0272935	3.10922e-05	0.978471	0.0706075	36.503	0.379399	0.119097	0.0077875	0.02659	0.00252087	5.45951	0.0652369	41.9256	2.18799	10.5645	1.4598	0.592266	0.00188833
15S-14	0.0215057	0.00477795	0.791878	0.120706	41.3863	0.830081	0.108285	0.00846301	0.0278004	0.00231742	5.55899	0.656081	33.1842	0.966418	14.8451	0.751421	0.522134	0.030452
11S-6	0.030606	0.00516999	0.971715	0.0461552	39.8314	0.340818	0.12135	0.0081871	0.0207154	0.00224194	4.40552	0.201836	38.3674	0.607896	12.2813	0.55474	0.635286	0.0178771
12S-10	0.0349888	0.00914919	1.02597	0.197741	38.9727	1.52794	0.104674	0.0102547	0.0187418	0.00398457	5.568	0.217847	40.9963	1.29361	10.1243	0.268018	0.53074	0.0130889
12S-28	0.0283771	0.0063643	0.853004	0.278229	43.4496	4.06887	0.142416	0.015704	0.0233061	0.000927355	4.19592	0.382959	33.9879	4.36958	14.4669	0.81444	0.554794	0.0447794
12S-3	0.0394476	0.00646167	0.998834	0.040519	40.4404	1.25494	0.182738	0.0203368	0.016627	0.000982008	3.60388	0.208925	40.3424	0.973146	11.0491	0.43238	0.533395	0.0266389
12S-30	0.0229138	0.00259502	0.652167	0.0284699	42.7584	0.793719	0.128106	0.0147173	0.0278481	0.00154393	4.42943	0.413103	42.072	0.376491	6.96076	0.556122	0.591786	0.0322941
12S-31	0.0548357	0.00714072	0.663538	0.0864997	42.1071	0.375225	0.148185	0.00503726	0.0239779	0.000600871	4.74991	0.220999	38.5121	0.768909	9.86812	0.101373	0.542826	0.00323524
13S-1	0.0392264	0.00634241	1.23926	0.167922	40.1855	3.15517	0.138161	0.0128802	0.0201528	0.00239921	4.27521	0.649615	38.5844	1.28426	10.5599	0.233944	0.662457	0.0541066
16S-12	0.0377792	0.0182178	0.607144	0.0988694	33.8661	1.02375	0.102289	0.00627126	0.0337748	0.00396341	4.01099	0.218633	48.1306	1.17434	9.30624	0.870637	0.527443	0.00356862
16S-13	0.0214733	0.00347011	0.795087	0.130316	39.8252	1.50785	0.177338	0.0190597	0.0176137	0.00221339	3.60692	0.11072	40.9433	2.81423	11.0914	1.02381	0.648038	0.0389147
13S-2	0.0317879	0.00544846	1.10744	0.165327	37.9996	1.73186	0.118096	0.0196039	0.0228865	0.00293418	4.97443	0.696591	39.7281	1.8294	11.5931	2.75451	0.594857	0.0542333
13S-22	0.0429821	0.010664	1.02511	0.477992	39.7275	1.70955	0.133409	0.0180657	0.0293159	0.00188215	4.50894	0.468366	42.2033	2.35878	9.14193	0.848286	0.586575	0.0297284
13S-24	0.0296737	0.00264341	1.26348	0.0318287	41.2315	1.56789	0.135652	0.00449944	0.0186707	0.0042934	4.72115	0.413886	40.0243	1.04092	9.59749	0.35186	0.624529	0.0324301
16S-16	0.0653123	0.00490478	0.456419	0.0519829	39.17	0.76489	0.134876	0.005966	0.0260294	0.00248329	4.60814	0.171576	41.568	0.269485	9.48136	0.629074	0.410327	0.0205036
13S-5	0.0352769	0.00296462	1.29823	0.149303	41.4626	1.52401	0.157864	0.0137923	0.0241142	0.00300487	4.3332	0.334265	39.9555	1.68992	9.95579	0.387837	0.642809	0.0276012
16S-22	0.0585113	0.0188621	0.501823	0.414947	40.5221	0.656467	0.129046	0.0186767	0.0242849	0.0013129	4.5562	0.393873	37.1816	1.05014	13.7259	0.506866	0.539885	0.0441657
16S-9	0.0418464	0.0194544	0.862205	0.0440582	38.8211	1.6671	0.129198	0.0324662	0.0290509	0.00485016	4.36831	0.628362	42.1869	1.68824	10.3066	0.700907	0.4643	0.0152092
14S-13	0.0545849	0.0134885	1.41311	0.167078	42.9609	0.404752	0.207001	0.0135802	0.0223354	0.00201124	4.17643	0.253893	36.8191	1.71778	11.3802	1.49672	0.607189	0.0102916
18N-4	0.0269321	0.00150324	0.803663	0.0866579	40.2586	1.56171	0.148011	0.0169706	0.0293473	0.00215243	4.0574	0.230991	43.8132	1.92121	7.63623	0.553534	0.592161	0.0173799
18S+2	0.0288719	0.00402914	0.955986	0.297315	43.7569	1.01231	0.155342	0.0162031	0.0261033	0.00315265	4.06303	0.338615	36.1555	1.32616	10.3946	0.936838	0.613552	0.0169696
18S+4	0.0217613	0.00204605	0.675088	0.0945346	41.3623	1.04123	0.182045	0.0209082	0.0230206	0.00300567	3.6529	0.409214	37.2681	1.18888	12.5157	0.823125	0.557923	0.00904652
16S-19	0.0186555	0.00263581	0.714032	0.149647	40.1048	2.3402	0.121427	0.0143451	0.0329059	0.00396995	3.57262	0.0530934	40.6442	1.32461	11.1684	0.354613	0.557872	0.0446887
16S-21	0.0276177	0.00806042	0.857565	0.0982789	41.5271	0.810573	0.164879	0.0410134	0.0257872	0.00746563	3.45282	0.737206	39.6792	1.57692	9.53852	0.605849	0.501973	0.0967515
18S-20	0.0178136	0.00277307	0.656083	0.0766666	38.3212	1.18763	0.0916271	0.00982534	0.0201751	0.00267674	7.45967	0.45711	35.6652	1.63428	14.7339	1.34317	0.545156	0.018774
18S-13	0.0648149	0.0317621	0.696404	0.115594	37.9237	2.50744	0.121262	0.00648291	0.0315762	0.00778551	4.42519	0.294301	41.4881	1.17255	10.8912	0.928438	0.528606	0.0232537
18S-18	0.0302173	0.00516846	0.856755	0.0345207	40.9658	0.995647	0.171452	0.00494736	0.0298277	0.00317069	4.22835	0.201874	38.8411	1.29083	12.0579	1.17333	0.599569	0.0126495
18S-6	0.026613	0.00347668	1.03172	0.0922907	40.5645	0.675567	0.125486	0.00477394	0.0216363	0.00294427	3.91591	0.0168937	36.2025	0.481263	14.3976	0.424969	0.549776	0.0120142
20S-17	0.0344557	0.00232482	1.20287	0.0707745	43.8188	2.36474	0.151227	0.0452542	0.0218977	0.00280364	3.93346	0.388349	35.6172	1.63001	11.9209	0.384238	0.48713	0.0142221
1N-2	0.0726218	0.00271503	0.608963	0.00704267	41.2725	0.705647	0.12675	0.00862666	0.0271978	0.00298994	4.8954	0.144281	38.6329	1.3816	10.6875	0.891167	0.494828	0.0180439
20S-21	0.0304159	0.0176285	0.690161	0.100587	36.8836	1.8363	0.147987	0.0269299	0.0276248	0.00431532	5.01408	0.275963	43.283	1.77044	10.7116	0.591282	0.576978	0.0212708
12S-15	0.036697	0.0013597	1.08076	0.0871625	38.0032	1.38125	0.133384	0.00105152	0.0227702	0.000547309	4.55216	0.088821	45.4366	0.908585	7.66689	0.152684	0.54728	0.0059791
12S-27	0.0314462	0.00608958	0.947155	0.179762	42.9252	1.21313	0.164306	0.00551968	0.0286708	0.00443299	3.81055	0.0414376	38.5748	1.15287	10.7567	0.646109	0.58737	0.0107377
2S-2	0.0127341	0.00231296	0.375446	0.0159874	35.0389	1.06914	0.0959173	0.010798	0.0316919	0.00265541	5.4861	0.299308	46.4712	1.14632	9.61527	0.305486	0.561364	0.0370839
14S-1	0.0386476	0.0067374	0.824609	0.180748	41.3388	1.26806	0.212821	0.0125522	0.0203265	0.00155092	2.95594	0.196265	39.1321	1.1974	11.7446	1.01657	0.487845	0.0172901
14S-11	0.0432162	0.0105443	0.849591	0.116018	41.4825	1.2005	0.150215	0.0168119	0.0257807	0.00172823	4.78592	0.652098	39.0178	1.71165	10.8146	0.516474	0.51261	0.00769303
14S-15	0.0470459	0.00580759	0.651792	0.0678123	38.9796	1.42288	0.146893	0.031025	0.0202117	0.00109064	4.28236	0.388646	41.1646	0.827013	11.2921	0.165136	0.59801	0.0125252
14S-7	0.030599	0.00525891	0.929325	0.213491	45.2434	1.04787	0.171663	0.0117535	0.0281673	0.00186259	3.56765	0.245411	39.4945	0.759356	7.49119	0.236712	0.578071	0.0253979
15S-12	0.0467286	0.0108325	0.738208	0.0443044	40.7061	0.798046	0.14744	0.00490427	0.0233639	0.00443814	4.24804	0.117038	38.6469	0.702727	12.0135	0.48101	0.637412	0.0400079
5N-2	0.0740726	0.0433365	1.14783	0.115284	42.9706	1.15796	0.211614	0.00973586	0.0230399	0.00253958	2.95939	0.07984	34.0515	0.783525	12.7684	0.28372	0.343114	0.0117282
15S-17	0.0406255	0.0312131	0.588288	0.0522194	38.3614	0.490148	0.132665	0.0163995	0.0186041	0.00474643	4.23621	0.81612	37.9687	2.5791	13.0786	0.746001	0.410106	0.0253437
5S-2	0.0365714	0.00481872	0.505239	0.0966212	39.9836	2.34676	0.130229	0.0148782	0.0297951	0.00239664	4.70004	0.432711	40.7598	2.55675	11.7878	0.82053	0.550387	0.018316
15S-19	0.0242657	0.00530191	1.10698	0.210918	36.6056	0.987467	0.0887734	0.0106634	0.0155782	0.00121325	6.33877	0.836414	38.1271	1.07121	13.5933	1.0592	0.566303	0.00811703
6S-1	0.0506829	0.0187006	0.755367	0.0618355	36.0358	1.40281	0.164392	0.00923019	0.0364639	0.00545755	3.55743	0.336723	44.9791	1.65914	10.5415	0.744762	0.298138	0.0321942
7N-1	0.0326824	0.00809312	0.710928	0.00432479	42.1096	0.99753	0.186569	0.0243608	0.0268025	0.0080183	3.36477	0.289032	34.2164	2.95847	14.1865	2.37642	0.536948	0.0535558
15S-5	0.0316106	0.000566017	0.636849	0.0815121	40.0694	2.24642	0.144112	0.0325741	0.0262732	0.00237512	5.11156	0.580175	39.8127	2.50739	11.097	0.806326	0.562234	0.0361477
7N-2	0.0701739	0.00441172	0.737968	0.140938	42.9332	1.57106	0.240218	0.0315499	0.0260349	0.00830942	3.54876	0.306108	37.0987	1.41257	11.6698	0.604934	0.505596	0.00562328
15S-8	0.0431922	0.00507548	0.812993	0.058542	38.8948	1.16909	0.144605	0.0284513	0.0294716	0.00356999	4.66888	0.704329	42.0669	0.865753	10.3711	0.367099	0.589427	0.0212537
7S-3	0.0359194	0.00535758	0.938179	0.126617	43.8528	1.18768	0.13766	0.00608996	0.0211542	0.00340101	4.35629	0.239453	36.3381	1.04537	11.1682	0.308175	0.440262	0.0280138
16S-15	0.0585493	0.00393061	0.731751	0.0836527	30.6861	0.705768	0.0804604	0.0111148	0.0201377	0.00193976	6.01912	0.485494	44.706	1.15023	14.07	1.72394	0.46891	0.0507302
8S-1	0.0240474	0.00316274	0.852338	0.140964	39.5717	1.88754	0.165492	0.0327386	0.0263552	0.00728465	4.73819	0.340539	39.3746	2.9137	12.4284	1.20388	0.56555	0.0156095
16S-18	0.123514	0.12869	0.506776	0.106179	32.5057	3.92628	0.124691	0.0140566	0.0286621	0.0160599	3.27559	0.517988	25.3989	4.51377	22.0293	0.708334	0.221868	0.0163079
17N-1	0.02317	3.43145e-05	0.568864	0.0899142	40.3565	1.64949	0.13114	0.00566415	0.0256704	0.00956033	4.05475	0.752193	33.8057	1.20083	12.0108	0.782157	0.415644	#DIV/0!
9S-3	0.0362908	0.00106445	1.16903	0.0935795	41.0639	1.68422	0.150279	0.0307997	0.0283792	0.00411419	4.01396	0.453107	42.5226	2.1994	8.32667	0.909928	0.63903	0.0203516
17S+2	0.0255745	0.00471181	0.908761	0.113901	40.1577	0.457609	0.121896	0.00916243	0.0288256	8.6684e-06	4.77856	0.240545	38.5475	0.0309358	10.5617	0.774373	0.607447	0.0127342
12S-11	0.0415894	0.00332846	1.35627	0.1299	42.195	2.09067	0.21297	0.0190791	0.023987	0.00381742	3.03233	0.0688078	40.9378	1.87382	9.63864	0.712453	0.59549	0.0305593
12S-12	0.0303364	0.000825431	1.00379	0.0462642	44.2979	0.114214	0.207388	0.00993268	0.0311786	0.00116829	3.05915	0.0948003	38.3255	0.945252	9.99179	0.819916	0.60649	0.00323539
12S-13	0.0268859	0.001341	0.78068	0.114225	38.4545	1.19045	0.125784	0.0079993	0.0267658	0.00177014	4.94273	0.125047	41.3769	0.0365057	10.919	0.316594	0.560572	0.00398365
18S+5	0.0869549	0.00602638	1.55913	0.0576759	47.4026	1.27982	0.197214	0.0228914	0.0293638	0.000419052	3.17306	0.153135	34.6858	1.35252	10.055	0.276972	0.394695	0.0420164
18S-1	0.0166351	0.00153224	0.582281	0.073146	39.2416	1.17194	0.100451	0.00823285	0.0298737	0.00393405	4.87632	0.0753489	43.1808	2.30201	8.93816	1.30047	0.595283	0.029644
18S-11	0.0738174	0.0978152	0.699859	0.267059	39.5365	2.56876	0.253741	0.0611648	0.0326198	0.02472	2.80385	0.638406	33.508	4.55815	14.5149	1.97197	0.424514	0.0468515
18S-12	0.0505827	0.00619431	1.09789	0.205738	43.9757	1.45285	0.178629	0.0235755	0.0319244	0.00580981	3.91343	0.412455	38.8652	1.40261	9.74103	0.640289	0.560147	0.0272085
18S-7	0.0608805	0.0070077	0.424329	0.0914951	35.6759	0.999252	0.116402	0.0145037	0.0217262	0.00404735	5.4694	0.210486	37.8559	1.94453	16.2247	1.08496	0.44243	0.00514214
18S-8	0.0384114	0.00505614	0.647013	0.0850483	39.8697	1.22284	0.161661	0.0128021	0.0239744	0.00128225	3.83078	0.193961	42.053	1.49497	11.236	0.28592	0.507944	0.0163532
19N-3	0.0263984	0.00290133	0.767201	0.0592373	40.3593	0.412835	0.187782	0.0139009	0.0264822	0.00126673	3.36401	0.140058	43.3267	0.920603	8.22834	1.00995	0.51697	0.00833291
19N-5	0.0209601	0.00420902	0.712998	0.206254	39.312	0.641925	0.148059	0.00966212	0.0223168	0.00158335	4.36246	0.203979	42.7253	1.1504	9.79148	0.682477	0.589237	0.0143048
19S+1	0.0472678	0.00520206	0.900905	0.179748	37.5993	0.801567	0.136285	0.0211668	0.03734	0.0050686	5.09347	0.218764	42.2944	1.33859	11.7947	0.392332	0.592882	0.0268903
19S+2	0.0622132	0.0115822	0.89202	0.128172	44.4074	0.997417	0.220315	0.00396935	0.0210493	0.0030979	2.68354	0.0875917	34.2571	0.824254	13.8816	0.506424	0.505191	0.00677974
20N-1	0.024361	0.00325376	0.798676	0.0474825	42.7292	1.49084	0.168548	0.00880559	0.0160738	0.00130622	4.02012	0.0412185	37.0001	2.41844	11.4217	1.48339	0.436767	0.0278201
20N-3	0.0501781	0.0249687	0.841789	0.120464	38.2706	1.51668	0.150834	0.0160498	0.0296164	0.00589223	4.42981	0.623995	41.0958	1.44053	11.8595	0.638417	0.594994	0.0357582
20S+1	0.0755963	0.0112712	0.85049	0.239509	40.2223	1.15028	0.152649	0.0113368	0.0316239	0.00311639	3.80679	0.860159	39.9304	2.62616	10.9911	0.207547	0.53264	0.000997962
20S-10	0.0239324	0.00152186	1.00203	0.0392964	40.5928	0.569046	0.128873	0.0115742	0.0203413	0.000838142	4.85517	0.361401	43.3315	0.788592	7.25986	0.129371	0.550673	0.0213337
20S-11	0.0314054	0.00790257	1.06416	0.0603971	41.4933	1.05679	0.168103	0.00645881	0.0186281	0.0026926	3.54053	0.264677	37.0432	0.238668	11.8977	0.267291	0.525368	0.0511883
20S-13	0.0605453	0.00836272	0.856002	0.0466531	42.1782	0.549705	0.147726	0.00262769	0.024461	0.00225302	3.86493	0.133319	37.9669	1.46276	11.2459	1.10289	0.516898	0.0196284
20S-19	0.0136597	0.00195634	0.360701	0.00599873	38.0367	0.891598	0.126831	0.0083638	0.0295184	0.00128532	4.57498	0.430442	43.2724	0.308378	10.6931	0.412089	0.60032	0.00510231
20S-2	0.0306694	0.00236696	0.950698	0.0615095	44.16	0.679789	0.141884	0.00474902	0.0259321	0.00377397	4.28823	0.0131476	37.4754	0.631867	8.89643	0.557683	0.544047	0.0102164
20S-24	0.0324491	0.00210824	0.910447	0.106446	40.7696	0.417382	0.133902	0.00187361	0.0235882	0.00616035	4.19819	0.268216	41.2585	1.29796	9.39362	0.117481	0.464713	0.0168915
20S-6	0.0245245	0.00442962	0.682475	0.278629	38.0833	1.21172	0.125219	0.0308208	0.0366775	0.0169226	5.40406	0.839294	38.4966	0.418235	12.1992	1.37673	0.541565	0.0152124
8S-4	0.031597	0.00507411	0.980783	0.0126849	32.5231	0.18012	0.062427	0.00108847	0.0276655	0.00416195	7.77089	0.076143	44.8973	0.226137	9.04768	0.0433625	0.468277	0.065506
2S-3	0.0306008	0.0055059	0.798503	0.0424221	42.2115	1.12468	0.228642	0.0139004	0.0232711	0.00203035	2.48752	0.116526	39.1298	1.23574	11.5996	0.820244	0.512994	0.0259851
11S-11	0.0204377	0.00330907	0.71628	0.0586733	40.5519	0.695922	0.15469	0.00840923	0.0200606	0.00228115	4.53467	0.270168	42.434	1.18207	8.51417	0.303847	0.518482	0.0165974
11S-16	0.0280713	0.00390003	0.869792	0.0605183	36.2315	1.14131	0.103228	0.00557692	0.0318191	0.00496694	4.96925	0.342261	45.8783	2.37217	8.79716	0.580801	0.665312	0.0449558
12S-1	0.0664685	0.00175351	1.06635	0.0762059	41.6781	1.04181	0.206975	0.0219909	0.0213646	0.00261561	3.18603	0.307511	40.0233	0.85593	10.0225	0.158485	0.464526	0.0306476
15N-2	0.0336443	0.00861223	0.973251	0.158397	42.8612	0.320298	0.156456	0.00305584	0.027704	0.00426755	3.89682	0.159574	39.6701	1.96197	9.33553	1.86318	0.582916	0.0350729
16N-2	0.0269097	0.00198788	0.831024	0.0757272	42.3397	0.885656	0.141366	0.0138271	0.0294679	0.0049824	3.86381	0.293865	41.154	1.31443	8.42118	0.999014	0.539712	0.0050148
18S-2	0.0291832	0.00273781	1.06058	0.0661926	42.8943	1.2112	0.177101	0.0153386	0.023327	0.00143534	3.61371	0.261016	41.0697	1.49664	8.44469	0.385496	0.585253	0.0225016
17S-2	0.0300441	0.00707601	1.03129	0.225003	44.4664	0.667343	0.228708	0.0169362	0.0264213	0.00749633	3.28897	0.0503379	31.9277	1.95816	15.4441	1.25049	0.476748	0.0493144
17S-5	0.0413281	0.00894768	0.715355	0.213484	38.8609	1.42862	0.116392	0.0178473	0.0287163	0.00379855	5.55021	0.255388	42.6233	1.56816	9.73807	0.225588	0.609129	0.0514908
17S-6	0.0848488	0.0231601	1.0789	0.00624161	45.233	2.19913	0.211317	0.0129592	0.0222086	0.00507875	3.32804	0.265203	34.2637	2.4191	11.656	0.509791	0.524786	0.00865435
17S-7	0.036454	0.0177468	0.674251	0.16085	43.286	1.04393	0.133411	0.00614027	0.0188364	0.00281091	4.14959	0.148325	33.5154	1.48712	14.1948	0.620595	0.585851	0.00863687
17S-12	0.0335914	0.0207467	0.675539	0.145469	39.125	2.3218	0.143543	0.01467	0.0197458	0.00269746	3.88104	0.215336	38.2015	2.20274	13.9112	0.42667	0.531223	0.0227545
17S-14	0.0195136	0.00198942	0.805922	0.0685353	44.6611	1.28503	0.142391	0.0265829	0.0218445	0.00265656	5.1211	0.574334	33.1345	0.901154	13.4779	0.473967	0.602293	0.0154241
17S-18	0.029911	0.000930889	0.590824	0.0257707	35.298	1.29665	0.100783	0.0205919	0.024111	0.00140117	5.51648	0.610215	40.601	1.28075	14.4229	0.94494	0.519625	0.0116573
17S-22	0.0253946	0.00337603	0.846123	0.159055	45.7305	1.43998	0.15613	0.033249	0.0216968	0.00193811	4.3146	0.534888	33.6495	1.5384	12.4022	0.874405	0.523445	0.0243754
17S-23	0.0190786	0.00144422	0.534362	0.0504859	39.774	1.10873	0.115716	0.00881234	0.0198499	0.000724904	4.85579	0.233796	38.8906	0.763798	12.2828	0.796643	0.556377	0.0355114
