# Supplementary material for: Genome-wide discovery and characterization of long noncoding RNAs in African oil palm (Elaeis guineensis Jacq.)
Source: PeerJ. 2020 Nov 2;8:e9585. doi: 10.7717/peerj.9585 (PMC7643553; doi:10.7717/peerj.9585)
Supplement: Supplemental Information 5 [file peerj-08-9585-s005.xlsx]

## Sheet: Table S4
Table S4 Detailed information for genomic position, promoter elements and expression levels of lncRNA genes identified in African oil palm.
LncRNA-ID	Chromosome/Contig	Start	End	Strand	Genomic length	Transcript length&	FPKM*	Transcript Type#	Type	Subtype
MSTRG.100	Chr1(NC_025993.1)	605934	608954	+	3021	206	0.155868	class_code "i"	Intronic-lncRNA	-
MSTRG.105	Chr1(NC_025993.1)	658546	666202	-	7657	1194	2.11009	class_code "x"	NAT-lncRNA	II
MSTRG.172	Chr1(NC_025993.1)	1418226	1427151	-	8926	471	2.05831	class_code "x"	NAT-lncRNA	II
MSTRG.215	Chr1(NC_025993.1)	1919120	1923526	+	4407	2572	0.192656	class_code "u"	lincRNA	-
MSTRG.310	Chr1(NC_025993.1)	3043117	3044568	+	1452	1255	0.447681	class_code "u"	lincRNA	-
MSTRG.314	Chr1(NC_025993.1)	3106164	3108560	-	2397	758	0.538041	class_code "x"	NAT-lncRNA	V
MSTRG.339	Chr1(NC_025993.1)	3352295	3355625	-	3331	1433	0.827838	class_code "x"	NAT-lncRNA	II
MSTRG.378	Chr1(NC_025993.1)	3688609	3689815	+	1207	949	0.261073	class_code "u"	lincRNA	-
MSTRG.449	Chr1(NC_025993.1)	4590767	4592131	+	1365	1267	1.64806	class_code "x"	NAT-lncRNA	VI
MSTRG.469	Chr1(NC_025993.1)	4855906	4856827	-	922	214	0.150292	class_code "u"	lincRNA	-
MSTRG.479	Chr1(NC_025993.1)	4961988	4962917	+	930	873	0.598432	class_code "o"	Sense-lncRNA	-
MSTRG.591	Chr1(NC_025993.1)	6328094	6336017	+	7924	2043	1.88927	class_code "x"	NAT-lncRNA	II
MSTRG.595	Chr1(NC_025993.1)	6360071	6367146	-	7076	3284	0.927644	class_code "u"	lincRNA	-
MSTRG.706	Chr1(NC_025993.1)	8507588	8508713	+	1126	621	0.255552	class_code "x"	NAT-lncRNA	II
MSTRG.734	Chr1(NC_025993.1)	8788335	8790939	+	2605	1359	0.953237	class_code "u"	lincRNA	-
MSTRG.746	Chr1(NC_025993.1)	8934826	8938370	-	3545	822	0.208368	class_code "o"	Sense-lncRNA	-
MSTRG.797	Chr1(NC_025993.1)	9626135	9626651	-	517	469	0.171442	class_code "x"	NAT-lncRNA	III
MSTRG.853	Chr1(NC_025993.1)	10422887	10424277	+	1391	1315	2.37708	class_code "u"	lincRNA	-
MSTRG.879	Chr1(NC_025993.1)	10670848	10671096	+	249	212	0.265492	class_code "o"	Sense-lncRNA	-
MSTRG.892	Chr1(NC_025993.1)	10834826	10835152	+	327	255	1.16647	class_code "x"	NAT-lncRNA	III
MSTRG.923	Chr1(NC_025993.1)	11369894	11370218	-	325	259	0.800936	class_code "x"	NAT-lncRNA	III
MSTRG.952	Chr1(NC_025993.1)	11656646	11659257	-	2612	729	2465.88	class_code "x"	NAT-lncRNA	VI
MSTRG.992	Chr1(NC_025993.1)	12036196	12036496	-	301	238	0.266894	class_code "x"	NAT-lncRNA	III
MSTRG.1046	Chr1(NC_025993.1)	12620406	12625993	-	5588	1434	0.262407	class_code "u"	lincRNA	-
MSTRG.1095	Chr1(NC_025993.1)	13493329	13501924	-	8596	884	0.737492	class_code "u"	lincRNA	-
MSTRG.1131	Chr1(NC_025993.1)	13809936	13812508	+	2573	2263	4.88399	class_code "x"	NAT-lncRNA	III
MSTRG.1147	Chr1(NC_025993.1)	14081987	14082458	-	472	378	0.212714	class_code "u"	lincRNA	-
MSTRG.1159	Chr1(NC_025993.1)	14189936	14192883	-	2948	667	0.98834	class_code "u"	lincRNA	-
MSTRG.1182	Chr1(NC_025993.1)	14426083	14428032	-	1950	469	0.137153	class_code "u"	lincRNA	-
MSTRG.1185	Chr1(NC_025993.1)	14438221	14441551	+	3331	3088	0.393245	class_code "x"	NAT-lncRNA	III
MSTRG.1227	Chr1(NC_025993.1)	15047549	15055723	+	8175	749	6.58008	class_code "u"	lincRNA	-
MSTRG.1248	Chr1(NC_025993.1)	15529703	15687478	-	157776	422	0.550267	class_code "u"	lincRNA	-
MSTRG.1257	Chr1(NC_025993.1)	16137236	16143692	+	6457	206	0.156128	class_code "u"	lincRNA	-
MSTRG.1289	Chr1(NC_025993.1)	16366897	16368109	-	1213	520	0.199469	class_code "u"	lincRNA	-
MSTRG.1290	Chr1(NC_025993.1)	16375772	16378116	-	2345	266	0.359913	class_code "u"	lincRNA	-
MSTRG.1321	Chr1(NC_025993.1)	16689606	16698789	-	9184	739	12.3529	class_code "u"	lincRNA	-
MSTRG.1355	Chr1(NC_025993.1)	17126292	17128436	-	2145	848	0.491602	class_code "x"	NAT-lncRNA	III
MSTRG.1416	Chr1(NC_025993.1)	17906180	17906647	-	468	363	0.308482	class_code "x"	NAT-lncRNA	V
MSTRG.1427	Chr1(NC_025993.1)	17998166	17998477	+	312	211	0.343726	class_code "x"	NAT-lncRNA	III
MSTRG.1463	Chr1(NC_025993.1)	18329333	18335033	-	5701	391	0.327382	class_code "u"	lincRNA	-
MSTRG.1469	Chr1(NC_025993.1)	18387135	18394382	-	7248	1881	0.862584	class_code "x"	NAT-lncRNA	II
MSTRG.1474	Chr1(NC_025993.1)	18448567	18472630	-	24064	516	1.74753	class_code "x"	NAT-lncRNA	III
MSTRG.1475	Chr1(NC_025993.1)	18452829	18453298	-	470	436	0.397481	class_code "x"	NAT-lncRNA	III
MSTRG.1562	Chr1(NC_025993.1)	19400543	19404060	+	3518	3333	1.37491	class_code "x"	NAT-lncRNA	V
MSTRG.1581	Chr1(NC_025993.1)	19686796	19699976	-	13181	1325	0.469739	class_code "u"	lincRNA	-
MSTRG.1582	Chr1(NC_025993.1)	19706659	19708959	+	2301	1408	1.17326	class_code "u"	lincRNA	-
MSTRG.1615	Chr1(NC_025993.1)	20035445	20035917	+	473	281	0.219185	class_code "u"	lincRNA	-
MSTRG.1622	Chr1(NC_025993.1)	20107077	20107525	+	449	339	6.01901	class_code "x"	NAT-lncRNA	III
MSTRG.1623	Chr1(NC_025993.1)	20122160	20126134	-	3975	626	0.946595	class_code "u"	lincRNA	-
MSTRG.1625	Chr1(NC_025993.1)	20140499	20142282	-	1784	1526	0.504057	class_code "u"	lincRNA	-
MSTRG.1639	Chr1(NC_025993.1)	20271315	20274482	+	3168	3007	1.23504	class_code "x"	NAT-lncRNA	III
MSTRG.1742	Chr1(NC_025993.1)	21370680	21371650	-	971	878	0.488358	class_code "u"	lincRNA	-
MSTRG.1743	Chr1(NC_025993.1)	21373260	21374276	+	1017	861	0.151773	class_code "x"	NAT-lncRNA	II
MSTRG.1746	Chr1(NC_025993.1)	21388942	21397396	+	8455	286	0.356298	class_code "x"	NAT-lncRNA	II
MSTRG.1749	Chr1(NC_025993.1)	21405307	21405769	-	463	337	10.4098	class_code "u"	lincRNA	-
MSTRG.1756	Chr1(NC_025993.1)	21477760	21478755	+	996	905	0.969627	class_code "u"	lincRNA	-
MSTRG.1761	Chr1(NC_025993.1)	21576046	21576564	+	519	393	3.55737	class_code "x"	NAT-lncRNA	III
MSTRG.1798	Chr1(NC_025993.1)	21907240	21908644	-	1405	1354	0.310645	class_code "x"	NAT-lncRNA	III
MSTRG.1815	Chr1(NC_025993.1)	22101252	22103033	+	1782	1687	0.279368	class_code "u"	lincRNA	-
MSTRG.1821	Chr1(NC_025993.1)	22149697	22163689	+	13993	1473	0.310073	class_code "u"	lincRNA	-
MSTRG.1825	Chr1(NC_025993.1)	22172554	22186406	-	13853	2518	0.924971	class_code "x"	NAT-lncRNA	VI
MSTRG.1841	Chr1(NC_025993.1)	22326699	22326939	-	241	202	0.199232	class_code "x"	NAT-lncRNA	III
MSTRG.1915	Chr1(NC_025993.1)	23282918	23285902	+	2985	2910	1.48984	class_code "x"	NAT-lncRNA	III
MSTRG.1946	Chr1(NC_025993.1)	23560229	23563961	-	3733	3567	0.320492	class_code "u"	lincRNA	-
MSTRG.1949	Chr1(NC_025993.1)	23575078	23580620	+	5543	724	0.77563	class_code "u"	lincRNA	-
MSTRG.1977	Chr1(NC_025993.1)	23845698	23854301	+	8604	2356	2.34953	class_code "x"	NAT-lncRNA	II
MSTRG.2088	Chr1(NC_025993.1)	25265764	25266131	-	368	265	0.181445	class_code "u"	lincRNA	-
MSTRG.2123	Chr1(NC_025993.1)	26345311	26351718	-	6408	371	0.61623	class_code "x"	NAT-lncRNA	II
MSTRG.2125	Chr1(NC_025993.1)	26452137	26475672	+	23536	1486	0.667447	class_code "x"	NAT-lncRNA	I
MSTRG.2168	Chr1(NC_025993.1)	27359137	27366321	+	7185	429	0.180117	class_code "x"	NAT-lncRNA	III
MSTRG.2199	Chr1(NC_025993.1)	27745994	27754477	-	8484	1813	0.170224	class_code "u"	lincRNA	-
MSTRG.2200	Chr1(NC_025993.1)	27753091	27754477	+	1387	1231	0.318889	class_code "u"	lincRNA	-
MSTRG.2224	Chr1(NC_025993.1)	28127650	28145665	-	18016	2680	1.17772	class_code "u"	lincRNA	-
MSTRG.2279	Chr1(NC_025993.1)	28889454	28889857	+	404	236	0.228612	class_code "x"	NAT-lncRNA	III
MSTRG.2280	Chr1(NC_025993.1)	28892772	28943369	+	50598	221	1.96778	class_code "x"	NAT-lncRNA	I
MSTRG.2299	Chr1(NC_025993.1)	29203669	29205930	+	2262	794	0.421001	class_code "u"	lincRNA	-
MSTRG.2313	Chr1(NC_025993.1)	29428621	29430112	-	1492	1310	0.367413	class_code "u"	lincRNA	-
MSTRG.2377	Chr1(NC_025993.1)	30296195	30297650	-	1456	847	0.285108	class_code "u"	lincRNA	-
MSTRG.2400	Chr1(NC_025993.1)	30676318	30682051	+	5734	887	0.548671	class_code "x"	NAT-lncRNA	VI
MSTRG.2420	Chr1(NC_025993.1)	30769818	30777616	+	7799	597	0.365801	class_code "u"	lincRNA	-
MSTRG.2423	Chr1(NC_025993.1)	30787674	30788501	-	828	757	0.285227	class_code "u"	lincRNA	-
MSTRG.2464	Chr1(NC_025993.1)	31296743	31343341	+	46599	223	0.22451	class_code "x"	NAT-lncRNA	I
MSTRG.2465	Chr1(NC_025993.1)	31297374	31297667	+	294	249	0.481669	class_code "x"	NAT-lncRNA	III
MSTRG.2635	Chr1(NC_025993.1)	33795038	33795365	-	328	217	0.15019	class_code "u"	lincRNA	-
MSTRG.2810	Chr1(NC_025993.1)	36757427	36764499	-	7073	831	1.31359	class_code "x"	NAT-lncRNA	V
MSTRG.2824	Chr1(NC_025993.1)	36980635	36980940	-	306	228	9.92627	class_code "x"	NAT-lncRNA	III
MSTRG.2848	Chr1(NC_025993.1)	37390239	37391835	+	1597	209	0.719679	class_code "u"	lincRNA	-
MSTRG.2876	Chr1(NC_025993.1)	37614906	37621465	+	6560	224	0.143582	class_code "x"	NAT-lncRNA	III
MSTRG.2883	Chr1(NC_025993.1)	37724172	37725120	-	949	584	9.21797	class_code "x"	NAT-lncRNA	VI
MSTRG.2928	Chr1(NC_025993.1)	38729152	38732165	-	3014	655	0.731634	class_code "u"	lincRNA	-
MSTRG.2939	Chr1(NC_025993.1)	38786138	38792293	-	6156	1515	1.29973	class_code "o"	Sense-lncRNA	-
MSTRG.2955	Chr1(NC_025993.1)	39080305	39083654	+	3350	1743	3.65952	class_code "u"	lincRNA	-
MSTRG.3057	Chr1(NC_025993.1)	40526894	40529320	-	2427	2123	0.749093	class_code "x"	NAT-lncRNA	III
MSTRG.3141	Chr1(NC_025993.1)	42470637	42471895	-	1259	329	0.168959	class_code "u"	lincRNA	-
MSTRG.3227	Chr1(NC_025993.1)	44118258	44131201	-	12944	4598	0.936797	class_code "x"	NAT-lncRNA	II
MSTRG.3291	Chr1(NC_025993.1)	45247556	45248218	+	663	335	0.460515	class_code "u"	lincRNA	-
MSTRG.3292	Chr1(NC_025993.1)	45248355	45250058	-	1704	1600	0.25013	class_code "u"	lincRNA	-
MSTRG.3376	Chr1(NC_025993.1)	47013442	47014505	+	1064	1043	0.426931	class_code "i"	Intronic-lncRNA	-
MSTRG.3383	Chr1(NC_025993.1)	47150618	47176054	-	25437	681	0.894896	class_code "x"	NAT-lncRNA	IV
MSTRG.3444	Chr1(NC_025993.1)	49046838	49047359	+	522	424	0.433757	class_code "x"	NAT-lncRNA	III
MSTRG.3464	Chr1(NC_025993.1)	49410143	49413909	+	3767	860	0.20569	class_code "u"	lincRNA	-
MSTRG.3505	Chr1(NC_025993.1)	49969403	49976008	-	6606	1389	0.725859	class_code "u"	lincRNA	-
MSTRG.3528	Chr1(NC_025993.1)	50317799	50321005	-	3207	1038	2.18785	class_code "u"	lincRNA	-
MSTRG.3535	Chr1(NC_025993.1)	50597999	50598462	+	464	306	0.262765	class_code "x"	NAT-lncRNA	V
MSTRG.3550	Chr1(NC_025993.1)	50995837	51010887	-	15051	1523	0.682035	class_code "u"	lincRNA	-
MSTRG.3574	Chr1(NC_025993.1)	51723070	51723698	+	629	425	0.227029	class_code "u"	lincRNA	-
MSTRG.3599	Chr1(NC_025993.1)	52593672	52631274	-	37603	1070	1.40051	class_code "x"	NAT-lncRNA	IV
MSTRG.3657	Chr1(NC_025993.1)	53948606	53949008	+	403	260	0.475221	class_code "u"	lincRNA	-
MSTRG.3673	Chr1(NC_025993.1)	54276706	54284421	-	7716	205	0.663644	class_code "u"	lincRNA	-
MSTRG.3678	Chr1(NC_025993.1)	54364808	54365391	+	584	526	0.223347	class_code "x"	NAT-lncRNA	III
MSTRG.3706	Chr1(NC_025993.1)	55055419	55059707	-	4289	435	0.257176	class_code "x"	NAT-lncRNA	V
MSTRG.3709	Chr1(NC_025993.1)	55070010	55077266	-	7257	5007	4.40073	class_code "u"	lincRNA	-
MSTRG.3731	Chr1(NC_025993.1)	55763002	55802231	+	39230	3783	1.24562	class_code "o"	Sense-lncRNA	-
MSTRG.3768	Chr1(NC_025993.1)	57093145	57093712	-	568	438	0.338268	class_code "x"	NAT-lncRNA	II
MSTRG.3810	Chr1(NC_025993.1)	58375192	58375870	+	679	595	0.294327	class_code "x"	NAT-lncRNA	III
MSTRG.3849	Chr1(NC_025993.1)	59166115	59167071	+	957	868	0.300504	class_code "i"	Intronic-lncRNA	-
MSTRG.3874	Chr1(NC_025993.1)	59795950	59796335	-	386	289	0.194755	class_code "x"	NAT-lncRNA	III
MSTRG.3875	Chr1(NC_025993.1)	59797528	59800849	-	3322	357	0.368472	class_code "x"	NAT-lncRNA	II
MSTRG.3932	Chr1(NC_025993.1)	60894974	60907126	-	12153	6600	6.96905	class_code "u"	lincRNA	-
MSTRG.3934	Chr1(NC_025993.1)	60939856	60989949	+	50094	245	1.76128	class_code "x"	NAT-lncRNA	I
MSTRG.4002	Chr1(NC_025993.1)	61663288	61664852	+	1565	1441	0.305397	class_code "u"	lincRNA	-
MSTRG.4003	Chr1(NC_025993.1)	61666996	61667564	+	569	471	0.396966	class_code "u"	lincRNA	-
MSTRG.4042	Chr1(NC_025993.1)	61991156	61991856	+	701	592	0.252131	class_code "x"	NAT-lncRNA	VI
MSTRG.4060	Chr1(NC_025993.1)	62266529	62267507	+	979	911	0.69344	class_code "x"	NAT-lncRNA	I
MSTRG.4063	Chr1(NC_025993.1)	62286109	62292971	-	6863	1166	0.973863	class_code "x"	NAT-lncRNA	III
MSTRG.4136	Chr1(NC_025993.1)	64948584	64949243	-	660	320	0.273548	class_code "u"	lincRNA	-
MSTRG.4141	Chr1(NC_025993.1)	65030985	65033492	-	2508	2477	0.603798	class_code "i"	Intronic-lncRNA	-
MSTRG.4246	Chr1(NC_025993.1)	67535332	67538002	+	2671	2190	0.322995	class_code "u"	lincRNA	-
MSTRG.4268	Chr1(NC_025993.1)	68178795	68180235	+	1441	1415	0.518311	class_code "u"	lincRNA	-
MSTRG.4377	Chr2(NC_025994.1)	1997518	2001983	+	4466	2430	1.89779	class_code "u"	lincRNA	-
MSTRG.4389	Chr2(NC_025994.1)	2147558	2149199	+	1642	1577	1.90126	class_code "x"	NAT-lncRNA	III
MSTRG.4403	Chr2(NC_025994.1)	2447916	2451521	-	3606	1012	1.06983	class_code "x"	NAT-lncRNA	III
MSTRG.4453	Chr2(NC_025994.1)	3085213	3099322	-	14110	6032	2.2562	class_code "x"	NAT-lncRNA	V
MSTRG.4483	Chr2(NC_025994.1)	3701722	3704962	+	3241	1529	1.0914	class_code "x"	NAT-lncRNA	III
MSTRG.4499	Chr2(NC_025994.1)	3928353	3991918	-	63566	1821	3.37012	class_code "x"	NAT-lncRNA	III
MSTRG.4500	Chr2(NC_025994.1)	4020114	4020548	+	435	352	0.182741	class_code "i"	Intronic-lncRNA	-
MSTRG.4501	Chr2(NC_025994.1)	4021085	4023611	+	2527	236	0.203287	class_code "o"	Sense-lncRNA	-
MSTRG.4533	Chr2(NC_025994.1)	4392366	4393663	+	1298	1166	0.738642	class_code "x"	NAT-lncRNA	III
MSTRG.4544	Chr2(NC_025994.1)	4527751	4538161	+	10411	2873	1.63656	class_code "x"	NAT-lncRNA	II
MSTRG.4560	Chr2(NC_025994.1)	4733207	4736951	-	3745	375	0.690277	class_code "x"	NAT-lncRNA	III
MSTRG.4577	Chr2(NC_025994.1)	4952277	4958888	+	6612	1813	41.9168	class_code "u"	lincRNA	-
MSTRG.4578	Chr2(NC_025994.1)	4956440	4963823	-	7384	4961	26.9787	class_code "u"	lincRNA	-
MSTRG.4684	Chr2(NC_025994.1)	6837380	6837850	-	471	419	0.490944	class_code "x"	NAT-lncRNA	III
MSTRG.4697	Chr2(NC_025994.1)	7041403	7041709	-	307	245	0.813688	class_code "x"	NAT-lncRNA	III
MSTRG.4762	Chr2(NC_025994.1)	8276134	8278055	+	1922	1831	1.10291	class_code "x"	NAT-lncRNA	III
MSTRG.4763	Chr2(NC_025994.1)	8284008	8309987	+	25980	665	3.78202	class_code "u"	lincRNA	-
MSTRG.4816	Chr2(NC_025994.1)	10654075	10956603	+	302529	296	4.13007	class_code "x"	NAT-lncRNA	I
MSTRG.4914	Chr2(NC_025994.1)	13332632	13333597	-	966	944	0.554211	class_code "x"	NAT-lncRNA	III
MSTRG.5026	Chr2(NC_025994.1)	16067783	16076887	+	9105	2174	1.2206	class_code "x"	NAT-lncRNA	III
MSTRG.5028	Chr2(NC_025994.1)	16088355	16089096	+	742	361	2.41279	class_code "x"	NAT-lncRNA	III
MSTRG.5036	Chr2(NC_025994.1)	16403498	16405001	+	1504	603	0.720766	class_code "u"	lincRNA	-
MSTRG.5070	Chr2(NC_025994.1)	17308313	17316572	+	8260	228	0.174918	class_code "u"	lincRNA	-
MSTRG.5073	Chr2(NC_025994.1)	17380089	17384166	-	4078	1127	0.427573	class_code "u"	lincRNA	-
MSTRG.5119	Chr2(NC_025994.1)	18779555	18794996	+	15442	2814	1.77458	class_code "u"	lincRNA	-
MSTRG.5121	Chr2(NC_025994.1)	18782277	18786140	-	3864	1518	0.618548	class_code "u"	lincRNA	-
MSTRG.5165	Chr2(NC_025994.1)	20060114	20065969	+	5856	5609	0.52685	class_code "x"	NAT-lncRNA	III
MSTRG.5256	Chr2(NC_025994.1)	21705389	21729994	-	24606	1334	1.7287	class_code "u"	lincRNA	-
MSTRG.5276	Chr2(NC_025994.1)	21909210	21911875	+	2666	2644	0.474023	class_code "x"	NAT-lncRNA	III
MSTRG.5289	Chr2(NC_025994.1)	22090346	22091177	-	832	698	1.17238	class_code "x"	NAT-lncRNA	III
MSTRG.5324	Chr2(NC_025994.1)	22666680	22696794	+	30115	1522	0.571929	class_code "x"	NAT-lncRNA	VI
MSTRG.5348	Chr2(NC_025994.1)	22883208	22885128	-	1921	1830	0.190623	class_code "o"	Sense-lncRNA	-
MSTRG.5384	Chr2(NC_025994.1)	23470905	23479565	+	8661	1946	2.56074	class_code "u"	lincRNA	-
MSTRG.5434	Chr2(NC_025994.1)	24147927	24151221	-	3295	1633	1.89881	class_code "u"	lincRNA	-
MSTRG.5533	Chr2(NC_025994.1)	25399121	25402226	-	3106	3035	1.25306	class_code "x"	NAT-lncRNA	VI
MSTRG.5557	Chr2(NC_025994.1)	26099212	26114360	-	15149	837	6.30554	class_code "x"	NAT-lncRNA	IV
MSTRG.5568	Chr2(NC_025994.1)	26238929	26242871	-	3943	3913	1.92766	class_code "u"	lincRNA	-
MSTRG.5593	Chr2(NC_025994.1)	26585578	26585949	+	372	234	0.395104	class_code "x"	NAT-lncRNA	III
MSTRG.5603	Chr2(NC_025994.1)	26726996	26727660	+	665	622	0.320849	class_code "x"	NAT-lncRNA	III
MSTRG.5607	Chr2(NC_025994.1)	26823483	26844470	+	20988	369	2.82255	class_code "x"	NAT-lncRNA	IV
MSTRG.5687	Chr2(NC_025994.1)	28059165	28063941	-	4777	1144	0.239438	class_code "u"	lincRNA	-
MSTRG.5737	Chr2(NC_025994.1)	28983083	28985612	-	2530	1530	5.34297	class_code "u"	lincRNA	-
MSTRG.5756	Chr2(NC_025994.1)	29178284	29179661	+	1378	585	0.176023	class_code "x"	NAT-lncRNA	I
MSTRG.5939	Chr2(NC_025994.1)	32013626	32022861	-	9236	591	0.215777	class_code "u"	lincRNA	-
MSTRG.6041	Chr2(NC_025994.1)	34267529	34272966	-	5438	881	0.272097	class_code "u"	lincRNA	-
MSTRG.6066	Chr2(NC_025994.1)	35140990	35141729	+	740	560	0.395521	class_code "x"	NAT-lncRNA	VI
MSTRG.6137	Chr2(NC_025994.1)	37207935	37208583	-	649	556	0.248931	class_code "u"	lincRNA	-
MSTRG.6143	Chr2(NC_025994.1)	37319992	37321398	+	1407	1291	0.123375	class_code "u"	lincRNA	-
MSTRG.6148	Chr2(NC_025994.1)	37418330	37422114	+	3785	3764	0.538319	class_code "x"	NAT-lncRNA	III
MSTRG.6151	Chr2(NC_025994.1)	37504893	37506231	-	1339	1063	0.180479	class_code "x"	NAT-lncRNA	VI
MSTRG.6167	Chr2(NC_025994.1)	38078060	38081225	+	3166	294	0.858576	class_code "u"	lincRNA	-
MSTRG.6292	Chr2(NC_025994.1)	40851882	40855514	+	3633	3525	2.92693	class_code "u"	lincRNA	-
MSTRG.6355	Chr2(NC_025994.1)	41795893	41813445	-	17553	817	0.588547	class_code "u"	lincRNA	-
MSTRG.6361	Chr2(NC_025994.1)	41895861	41897431	-	1571	1452	1.60374	class_code "u"	lincRNA	-
MSTRG.6481	Chr2(NC_025994.1)	43561088	43561545	-	458	399	0.45906	class_code "x"	NAT-lncRNA	III
MSTRG.6536	Chr2(NC_025994.1)	44252333	44252661	+	329	247	0.162765	class_code "x"	NAT-lncRNA	III
MSTRG.6593	Chr2(NC_025994.1)	44806987	44809227	+	2241	708	0.452985	class_code "x"	NAT-lncRNA	III
MSTRG.6629	Chr2(NC_025994.1)	45509940	45512408	+	2469	2168	2.04951	class_code "u"	lincRNA	-
MSTRG.6678	Chr2(NC_025994.1)	46042767	46044339	-	1573	1102	0.768902	class_code "x"	NAT-lncRNA	VI
MSTRG.6695	Chr2(NC_025994.1)	46233099	46235036	-	1938	728	0.220896	class_code "x"	NAT-lncRNA	III
MSTRG.6726	Chr2(NC_025994.1)	46646576	46715821	-	69246	356	1.00212	class_code "u"	lincRNA	-
MSTRG.6822	Chr2(NC_025994.1)	47887239	47899196	+	11958	1381	4.01196	class_code "u"	lincRNA	-
MSTRG.6825	Chr2(NC_025994.1)	48059682	48061922	-	2241	2013	0.350906	class_code "u"	lincRNA	-
MSTRG.6830	Chr2(NC_025994.1)	48107984	48108320	-	337	265	0.242735	class_code "i"	Intronic-lncRNA	-
MSTRG.6852	Chr2(NC_025994.1)	48397446	48401722	-	4277	217	0.341139	class_code "x"	NAT-lncRNA	II
MSTRG.6870	Chr2(NC_025994.1)	48707212	48711128	-	3917	3209	7.7165	class_code "u"	lincRNA	-
MSTRG.6895	Chr2(NC_025994.1)	49164200	49164517	+	318	243	0.388243	class_code "x"	NAT-lncRNA	III
MSTRG.6954	Chr2(NC_025994.1)	50049151	50049443	+	293	222	0.144876	class_code "u"	lincRNA	-
MSTRG.6987	Chr2(NC_025994.1)	50439512	50443324	-	3813	2044	4.28932	class_code "u"	lincRNA	-
MSTRG.7047	Chr2(NC_025994.1)	51351246	51361381	-	10136	748	0.213198	class_code "u"	lincRNA	-
MSTRG.7095	Chr2(NC_025994.1)	52001930	52005564	-	3635	1422	0.868826	class_code "x"	NAT-lncRNA	VI
MSTRG.7108	Chr2(NC_025994.1)	52309197	52312274	+	3078	325	0.297214	class_code "u"	lincRNA	-
MSTRG.7125	Chr2(NC_025994.1)	52513625	52518137	-	4513	2628	1.79302	class_code "u"	lincRNA	-
MSTRG.7199	Chr2(NC_025994.1)	53431670	53446532	-	14863	2893	1.7482	class_code "u"	lincRNA	-
MSTRG.7206	Chr2(NC_025994.1)	53589301	53593253	+	3953	3494	1.33316	class_code "x"	NAT-lncRNA	VI
MSTRG.7317	Chr2(NC_025994.1)	55445849	55467049	+	21201	1452	2.20042	class_code "u"	lincRNA	-
MSTRG.7343	Chr2(NC_025994.1)	55903760	55904292	+	533	231	0.442059	class_code "u"	lincRNA	-
MSTRG.7354	Chr2(NC_025994.1)	56042793	56047879	-	5087	762	0.583411	class_code "x"	NAT-lncRNA	III
MSTRG.7370	Chr2(NC_025994.1)	56394454	56394768	+	315	264	0.833009	class_code "x"	NAT-lncRNA	III
MSTRG.7396	Chr2(NC_025994.1)	56756531	56835337	+	78807	435	10.4558	class_code "x"	NAT-lncRNA	IV
MSTRG.7397	Chr2(NC_025994.1)	56756532	56768754	-	12223	3271	87.5629	class_code "u"	lincRNA	-
MSTRG.7438	Chr2(NC_025994.1)	57594681	57597972	+	3292	908	1.93318	class_code "u"	lincRNA	-
MSTRG.7552	Chr2(NC_025994.1)	58945647	58974207	-	28561	649	2.88386	class_code "u"	lincRNA	-
MSTRG.7564	Chr2(NC_025994.1)	59304592	59321181	+	16590	285	0.915457	class_code "x"	NAT-lncRNA	V
MSTRG.7697	Chr2(NC_025994.1)	61202068	61206316	-	4249	338	2.3379	class_code "u"	lincRNA	-
MSTRG.7698	Chr2(NC_025994.1)	61202429	61206674	-	4246	309	0.420332	class_code "u"	lincRNA	-
MSTRG.7700	Chr2(NC_025994.1)	61295276	61297121	+	1846	904	3.49783	class_code "u"	lincRNA	-
MSTRG.7703	Chr2(NC_025994.1)	61410496	61430625	+	20130	278	0.173034	class_code "x"	NAT-lncRNA	I
MSTRG.7727	Chr2(NC_025994.1)	61780004	61780718	-	715	635	9.02291	class_code "u"	lincRNA	-
MSTRG.7803	Chr2(NC_025994.1)	62947253	62948241	-	989	646	0.204918	class_code "u"	lincRNA	-
MSTRG.7838	Chr2(NC_025994.1)	63906248	63907660	+	1413	288	0.167513	class_code "x"	NAT-lncRNA	III
MSTRG.7841	Chr2(NC_025994.1)	63925102	63925486	+	385	291	0.275941	class_code "x"	NAT-lncRNA	III
MSTRG.7861	Chr2(NC_025994.1)	64164313	64166274	-	1962	1629	1.90992	class_code "x"	NAT-lncRNA	III
MSTRG.7886	Chr2(NC_025994.1)	64505966	64512219	+	6254	2730	0.48654	class_code "x"	NAT-lncRNA	II
MSTRG.7902	Chr2(NC_025994.1)	64663702	64670684	+	6983	207	0.718087	class_code "x"	NAT-lncRNA	I
MSTRG.7938	Chr2(NC_025994.1)	65409820	65424830	-	15011	347	0.161894	class_code "o"	Sense-lncRNA	-
MSTRG.7968	Chr3(NC_025995.1)	269440	270321	+	882	803	3.71704	class_code "x"	NAT-lncRNA	II
MSTRG.7982	Chr3(NC_025995.1)	386058	386352	+	295	246	0.56177	class_code "x"	NAT-lncRNA	III
MSTRG.7994	Chr3(NC_025995.1)	557867	558379	-	513	320	0.352011	class_code "u"	lincRNA	-
MSTRG.8018	Chr3(NC_025995.1)	812796	813513	+	718	582	3.4734	class_code "x"	NAT-lncRNA	III
MSTRG.8044	Chr3(NC_025995.1)	1267431	1268144	+	714	252	0.1489	class_code "u"	lincRNA	-
MSTRG.8080	Chr3(NC_025995.1)	1757411	1758517	-	1107	1086	5.01801	class_code "u"	lincRNA	-
MSTRG.8091	Chr3(NC_025995.1)	1926627	1933009	-	6383	3733	0.390007	class_code "u"	lincRNA	-
MSTRG.8102	Chr3(NC_025995.1)	2045291	2045676	+	386	203	0.284166	class_code "x"	NAT-lncRNA	III
MSTRG.8109	Chr3(NC_025995.1)	2150546	2151544	+	999	765	0.387631	class_code "x"	NAT-lncRNA	III
MSTRG.8183	Chr3(NC_025995.1)	3229683	3237282	+	7600	268	0.479636	class_code "u"	lincRNA	-
MSTRG.8192	Chr3(NC_025995.1)	3343145	3347002	+	3858	205	0.9616	class_code "x"	NAT-lncRNA	III
MSTRG.8199	Chr3(NC_025995.1)	3444250	3446349	+	2100	1836	1.31039	class_code "u"	lincRNA	-
MSTRG.8209	Chr3(NC_025995.1)	3531947	3532410	-	464	422	1.89181	class_code "u"	lincRNA	-
MSTRG.8215	Chr3(NC_025995.1)	3628665	3632949	+	4285	4098	0.315815	class_code "u"	lincRNA	-
MSTRG.8225	Chr3(NC_025995.1)	3876229	3878066	-	1838	1765	1.35817	class_code "u"	lincRNA	-
MSTRG.8324	Chr3(NC_025995.1)	5380091	5382501	-	2411	2106	0.533521	class_code "x"	NAT-lncRNA	III
MSTRG.8352	Chr3(NC_025995.1)	5793680	5795482	-	1803	1734	5.23338	class_code "u"	lincRNA	-
MSTRG.8402	Chr3(NC_025995.1)	6521625	6524373	+	2749	632	0.97802	class_code "u"	lincRNA	-
MSTRG.8403	Chr3(NC_025995.1)	6524501	6526244	+	1744	1616	0.229177	class_code "u"	lincRNA	-
MSTRG.8426	Chr3(NC_025995.1)	6807548	6811527	+	3980	1104	3.96935	class_code "u"	lincRNA	-
MSTRG.8438	Chr3(NC_025995.1)	6906927	6907804	-	878	773	12.2345	class_code "u"	lincRNA	-
MSTRG.8477	Chr3(NC_025995.1)	7385998	7393358	+	7361	1010	0.713935	class_code "x"	NAT-lncRNA	II
MSTRG.8540	Chr3(NC_025995.1)	8225321	8225886	-	566	454	0.453155	class_code "u"	lincRNA	-
MSTRG.8560	Chr3(NC_025995.1)	8510915	8515553	+	4639	547	0.468815	class_code "x"	NAT-lncRNA	I
MSTRG.8627	Chr3(NC_025995.1)	9317101	9324291	+	7191	575	4.70642	class_code "x"	NAT-lncRNA	II
MSTRG.8641	Chr3(NC_025995.1)	9500047	9500970	-	924	863	0.539312	class_code "u"	lincRNA	-
MSTRG.8710	Chr3(NC_025995.1)	10310920	10311356	+	437	286	0.594143	class_code "x"	NAT-lncRNA	I
MSTRG.8732	Chr3(NC_025995.1)	10767103	10772524	+	5422	335	0.203855	class_code "u"	lincRNA	-
MSTRG.8771	Chr3(NC_025995.1)	11472372	11474870	+	2499	586	0.77113	class_code "x"	NAT-lncRNA	II
MSTRG.8818	Chr3(NC_025995.1)	12209996	12210859	-	864	456	0.652183	class_code "x"	NAT-lncRNA	III
MSTRG.8827	Chr3(NC_025995.1)	12415908	12427476	-	11569	7672	1.3592	class_code "u"	lincRNA	-
MSTRG.8840	Chr3(NC_025995.1)	12553493	12554554	-	1062	1010	0.254062	class_code "i"	Intronic-lncRNA	-
MSTRG.8873	Chr3(NC_025995.1)	12946168	12947422	+	1255	268	0.657874	class_code "x"	NAT-lncRNA	III
MSTRG.9052	Chr3(NC_025995.1)	15190613	15192490	+	1878	789	1.26116	class_code "u"	lincRNA	-
MSTRG.9108	Chr3(NC_025995.1)	15654646	15657327	-	2682	2560	2.01056	class_code "u"	lincRNA	-
MSTRG.9189	Chr3(NC_025995.1)	16791223	16796924	-	5702	1409	0.646099	class_code "u"	lincRNA	-
MSTRG.9212	Chr3(NC_025995.1)	17158177	17158690	+	514	292	0.156406	class_code "u"	lincRNA	-
MSTRG.9213	Chr3(NC_025995.1)	17212354	17212753	+	400	228	0.210655	class_code "u"	lincRNA	-
MSTRG.9229	Chr3(NC_025995.1)	17363253	17368590	-	5338	4992	1.28365	class_code "u"	lincRNA	-
MSTRG.9232	Chr3(NC_025995.1)	17388673	17411346	-	22674	604	1.67379	class_code "x"	NAT-lncRNA	II
MSTRG.9346	Chr3(NC_025995.1)	19023134	19025648	+	2515	804	0.333292	class_code "u"	lincRNA	-
MSTRG.9364	Chr3(NC_025995.1)	19215266	19216005	+	740	638	3.3022	class_code "x"	NAT-lncRNA	III
MSTRG.9372	Chr3(NC_025995.1)	19261929	19326014	-	64086	375	0.369939	class_code "u"	lincRNA	-
MSTRG.9396	Chr3(NC_025995.1)	19589250	19594183	+	4934	2846	0.676492	class_code "u"	lincRNA	-
MSTRG.9422	Chr3(NC_025995.1)	19814258	19822127	-	7870	7824	1.02825	class_code "x"	NAT-lncRNA	III
MSTRG.9427	Chr3(NC_025995.1)	19848837	19849164	+	328	208	0.411823	class_code "u"	lincRNA	-
MSTRG.9486	Chr3(NC_025995.1)	20768047	20770375	+	2329	2203	0.97429	class_code "x"	NAT-lncRNA	III
MSTRG.9556	Chr3(NC_025995.1)	21622653	21623019	-	367	295	0.163538	class_code "x"	NAT-lncRNA	V
MSTRG.9572	Chr3(NC_025995.1)	21810543	21810844	+	302	216	3.29852	class_code "x"	NAT-lncRNA	III
MSTRG.9637	Chr3(NC_025995.1)	23034324	23041147	+	6824	6255	0.623649	class_code "x"	NAT-lncRNA	III
MSTRG.9719	Chr3(NC_025995.1)	24027404	24049178	+	21775	369	1.17173	class_code "u"	lincRNA	-
MSTRG.9753	Chr3(NC_025995.1)	24392551	24393409	-	859	391	0.329027	class_code "u"	lincRNA	-
MSTRG.9777	Chr3(NC_025995.1)	24638106	24643487	-	5382	5280	1.81394	class_code "u"	lincRNA	-
MSTRG.9931	Chr3(NC_025995.1)	27027248	27031724	-	4477	227	0.423165	class_code "u"	lincRNA	-
MSTRG.9962	Chr3(NC_025995.1)	27423823	27548876	+	125054	476	0.55409	class_code "x"	NAT-lncRNA	I
MSTRG.10011	Chr3(NC_025995.1)	28270338	28272014	+	1677	1629	0.629263	class_code "x"	NAT-lncRNA	II
MSTRG.10064	Chr3(NC_025995.1)	29146008	29152372	-	6365	1392	0.753287	class_code "x"	NAT-lncRNA	II
MSTRG.10122	Chr3(NC_025995.1)	30363559	30363905	+	347	315	1.87835	class_code "x"	NAT-lncRNA	III
MSTRG.10183	Chr3(NC_025995.1)	31741309	31747103	-	5795	336	0.35736	class_code "u"	lincRNA	-
MSTRG.10295	Chr3(NC_025995.1)	34489411	34491921	+	2511	607	0.55591	class_code "u"	lincRNA	-
MSTRG.10328	Chr3(NC_025995.1)	36084012	36088068	-	4057	4033	1.97928	class_code "x"	NAT-lncRNA	III
MSTRG.10334	Chr3(NC_025995.1)	36146592	36185744	+	39153	272	3.12953	class_code "x"	NAT-lncRNA	I
MSTRG.10373	Chr3(NC_025995.1)	37120331	37132665	+	12335	2915	22.0279	class_code "u"	lincRNA	-
MSTRG.10380	Chr3(NC_025995.1)	37157160	37200166	-	43007	3687	0.680409	class_code "x"	NAT-lncRNA	II
MSTRG.10383	Chr3(NC_025995.1)	37257425	37266355	+	8931	674	0.481271	class_code "x"	NAT-lncRNA	V
MSTRG.10432	Chr3(NC_025995.1)	38236224	38256786	-	20563	1753	1.0047	class_code "x"	NAT-lncRNA	V
MSTRG.10436	Chr3(NC_025995.1)	38300012	38301737	-	1726	410	0.313649	class_code "o"	Sense-lncRNA	-
MSTRG.10554	Chr3(NC_025995.1)	41450123	41450599	+	477	390	2.16464	class_code "x"	NAT-lncRNA	II
MSTRG.10593	Chr3(NC_025995.1)	42551034	42555328	-	4295	4020	0.807768	class_code "x"	NAT-lncRNA	II
MSTRG.10598	Chr3(NC_025995.1)	42721991	42724499	+	2509	2425	0.476683	class_code "o"	Sense-lncRNA	-
MSTRG.10606	Chr3(NC_025995.1)	42948574	42952641	-	4068	1271	3.48096	class_code "u"	lincRNA	-
MSTRG.10607	Chr3(NC_025995.1)	43021034	43021762	-	729	459	0.412366	class_code "u"	lincRNA	-
MSTRG.10665	Chr3(NC_025995.1)	44279084	44279672	-	589	233	0.453219	class_code "u"	lincRNA	-
MSTRG.10670	Chr3(NC_025995.1)	44718610	44726323	-	7714	5282	1.45411	class_code "x"	NAT-lncRNA	III
MSTRG.10671	Chr3(NC_025995.1)	44726405	44730444	-	4040	2078	0.71546	class_code "x"	NAT-lncRNA	III
MSTRG.10673	Chr3(NC_025995.1)	44743733	44745431	-	1699	1512	1.11749	class_code "u"	lincRNA	-
MSTRG.10690	Chr3(NC_025995.1)	45019676	45023489	-	3814	227	0.305094	class_code "u"	lincRNA	-
MSTRG.10784	Chr3(NC_025995.1)	48062248	48063569	+	1322	222	0.247738	class_code "u"	lincRNA	-
MSTRG.10803	Chr3(NC_025995.1)	48223223	48223906	-	684	664	0.247273	class_code "x"	NAT-lncRNA	III
MSTRG.10818	Chr3(NC_025995.1)	48858750	48872189	-	13440	1002	0.407183	class_code "x"	NAT-lncRNA	III
MSTRG.10934	Chr3(NC_025995.1)	52669762	52670550	-	789	372	0.207067	class_code "u"	lincRNA	-
MSTRG.10941	Chr3(NC_025995.1)	52684163	52686064	+	1902	1882	1.03319	class_code "x"	NAT-lncRNA	III
MSTRG.10950	Chr3(NC_025995.1)	52961425	52962866	-	1442	1345	1.82146	class_code "x"	NAT-lncRNA	I
MSTRG.10957	Chr3(NC_025995.1)	53116163	53167989	-	51827	1375	8.25725	class_code "x"	NAT-lncRNA	II
MSTRG.10977	Chr3(NC_025995.1)	54004454	54004851	-	398	297	0.428381	class_code "u"	lincRNA	-
MSTRG.10979	Chr3(NC_025995.1)	54210348	54211833	+	1486	412	0.787718	class_code "u"	lincRNA	-
MSTRG.10999	Chr3(NC_025995.1)	54621061	54627244	-	6184	1211	1.15577	class_code "u"	lincRNA	-
MSTRG.11019	Chr3(NC_025995.1)	54754206	54756701	+	2496	2447	0.517705	class_code "x"	NAT-lncRNA	III
MSTRG.11048	Chr3(NC_025995.1)	55396614	55422903	-	26290	1925	2.68734	class_code "u"	lincRNA	-
MSTRG.11061	Chr3(NC_025995.1)	55627306	55629858	-	2553	415	0.847559	class_code "x"	NAT-lncRNA	III
MSTRG.11069	Chr3(NC_025995.1)	55738177	55738572	+	396	291	0.156207	class_code "x"	NAT-lncRNA	III
MSTRG.11109	Chr3(NC_025995.1)	56764259	56764623	+	365	293	0.218441	class_code "x"	NAT-lncRNA	III
MSTRG.11128	Chr3(NC_025995.1)	57160123	57163812	-	3690	620	0.180611	class_code "x"	NAT-lncRNA	I
MSTRG.11156	Chr3(NC_025995.1)	57776320	57793714	-	17395	995	0.208895	class_code "x"	NAT-lncRNA	II
MSTRG.11163	Chr3(NC_025995.1)	57991094	57997244	+	6151	228	0.150585	class_code "x"	NAT-lncRNA	III
MSTRG.11243	Chr4(NC_025996.1)	193032	193643	+	612	499	0.273	class_code "u"	lincRNA	-
MSTRG.11261	Chr4(NC_025996.1)	406245	407961	-	1717	523	0.19689	class_code "u"	lincRNA	-
MSTRG.11331	Chr4(NC_025996.1)	2276108	2703052	+	426945	228	1.23689	class_code "x"	NAT-lncRNA	I
MSTRG.11378	Chr4(NC_025996.1)	4073344	4164778	-	91435	320	1.00608	class_code "x"	NAT-lncRNA	II
MSTRG.11474	Chr4(NC_025996.1)	6161550	6166274	+	4725	1179	0.692943	class_code "x"	NAT-lncRNA	V
MSTRG.11517	Chr4(NC_025996.1)	7910343	7917372	+	7030	1243	0.31218	class_code "x"	NAT-lncRNA	III
MSTRG.11531	Chr4(NC_025996.1)	8774184	8774755	-	572	540	0.670745	class_code "u"	lincRNA	-
MSTRG.11549	Chr4(NC_025996.1)	9061213	9064626	+	3414	1854	0.382456	class_code "u"	lincRNA	-
MSTRG.11590	Chr4(NC_025996.1)	10375509	10379586	+	4078	4055	0.869456	class_code "x"	NAT-lncRNA	III
MSTRG.11624	Chr4(NC_025996.1)	11523192	11523648	-	457	228	0.491841	class_code "x"	NAT-lncRNA	I
MSTRG.11686	Chr4(NC_025996.1)	14036739	14044506	+	7768	1302	0.320253	class_code "u"	lincRNA	-
MSTRG.11762	Chr4(NC_025996.1)	16594957	16596321	-	1365	1265	0.431756	class_code "x"	NAT-lncRNA	II
MSTRG.11809	Chr4(NC_025996.1)	18484442	18500414	-	15973	2282	1.36873	class_code "o"	Sense-lncRNA	-
MSTRG.11838	Chr4(NC_025996.1)	19126592	19131307	-	4716	826	0.655351	class_code "u"	lincRNA	-
MSTRG.11876	Chr4(NC_025996.1)	20933280	20934288	-	1009	942	0.518774	class_code "x"	NAT-lncRNA	II
MSTRG.11940	Chr4(NC_025996.1)	22880756	22888501	+	7746	7069	0.957229	class_code "x"	NAT-lncRNA	III
MSTRG.11943	Chr4(NC_025996.1)	23073989	23075593	-	1605	295	0.296003	class_code "u"	lincRNA	-
MSTRG.12021	Chr4(NC_025996.1)	25373833	25375167	+	1335	808	0.759004	class_code "x"	NAT-lncRNA	III
MSTRG.12022	Chr4(NC_025996.1)	25401373	25403733	+	2361	2335	8.0312	class_code "x"	NAT-lncRNA	III
MSTRG.12042	Chr4(NC_025996.1)	26004399	26007508	+	3110	295	12.5364	class_code "x"	NAT-lncRNA	III
MSTRG.12064	Chr4(NC_025996.1)	26505982	26518860	-	12879	260	0.244311	class_code "u"	lincRNA	-
MSTRG.12125	Chr4(NC_025996.1)	27970906	27971221	+	316	227	0.141685	class_code "x"	NAT-lncRNA	III
MSTRG.12138	Chr4(NC_025996.1)	28559681	28561704	+	2024	1882	2.27322	class_code "x"	NAT-lncRNA	III
MSTRG.12171	Chr4(NC_025996.1)	29508109	29521945	+	13837	3011	0.594924	class_code "u"	lincRNA	-
MSTRG.12173	Chr4(NC_025996.1)	29548677	29558340	+	9664	6840	6.06394	class_code "u"	lincRNA	-
MSTRG.12242	Chr4(NC_025996.1)	31620116	31625621	+	5506	1142	0.374665	class_code "o"	Sense-lncRNA	-
MSTRG.12339	Chr4(NC_025996.1)	33388026	33388605	-	580	466	0.280674	class_code "u"	lincRNA	-
MSTRG.12359	Chr4(NC_025996.1)	33728833	33729177	+	345	298	3.61809	class_code "x"	NAT-lncRNA	III
MSTRG.12377	Chr4(NC_025996.1)	33950257	33951577	+	1321	1300	0.430028	class_code "x"	NAT-lncRNA	III
MSTRG.12384	Chr4(NC_025996.1)	34108881	34112919	+	4039	876	1.16381	class_code "x"	NAT-lncRNA	VI
MSTRG.12387	Chr4(NC_025996.1)	34233028	34233986	+	959	933	0.535891	class_code "x"	NAT-lncRNA	III
MSTRG.12405	Chr4(NC_025996.1)	34463175	34467555	-	4381	415	0.536299	class_code "u"	lincRNA	-
MSTRG.12441	Chr4(NC_025996.1)	35026704	35027788	-	1085	781	0.390946	class_code "u"	lincRNA	-
MSTRG.12480	Chr4(NC_025996.1)	35574971	35579581	-	4611	378	1.16085	class_code "u"	lincRNA	-
MSTRG.12524	Chr4(NC_025996.1)	36260435	36260954	-	520	459	0.147265	class_code "x"	NAT-lncRNA	VI
MSTRG.12543	Chr4(NC_025996.1)	36527592	36528172	-	581	543	0.620638	class_code "u"	lincRNA	-
MSTRG.12563	Chr4(NC_025996.1)	36928472	36933772	+	5301	5188	1.00665	class_code "u"	lincRNA	-
MSTRG.12584	Chr4(NC_025996.1)	37194203	37197832	-	3630	431	1.53199	class_code "u"	lincRNA	-
MSTRG.12655	Chr4(NC_025996.1)	38260397	38261379	+	983	215	0.148595	class_code "x"	NAT-lncRNA	V
MSTRG.12663	Chr4(NC_025996.1)	38378402	38393038	+	14637	7756	6.94706	class_code "u"	lincRNA	-
MSTRG.12744	Chr4(NC_025996.1)	39827163	39831433	+	4271	3548	6.6615	class_code "u"	lincRNA	-
MSTRG.12750	Chr4(NC_025996.1)	39900764	39903770	-	3007	2920	0.364141	class_code "o"	Sense-lncRNA	-
MSTRG.12756	Chr4(NC_025996.1)	40006449	40007903	+	1455	1404	0.20614	class_code "x"	NAT-lncRNA	III
MSTRG.12777	Chr4(NC_025996.1)	40424233	40428700	+	4468	2197	0.349439	class_code "x"	NAT-lncRNA	VI
MSTRG.12826	Chr4(NC_025996.1)	41233776	41234087	-	312	275	0.428248	class_code "x"	NAT-lncRNA	III
MSTRG.12869	Chr4(NC_025996.1)	41706805	41710679	+	3875	443	2.61426	class_code "x"	NAT-lncRNA	II
MSTRG.12938	Chr4(NC_025996.1)	42690819	42693179	+	2361	1402	0.632788	class_code "x"	NAT-lncRNA	I
MSTRG.12975	Chr4(NC_025996.1)	43434143	43434526	+	384	313	0.35913	class_code "x"	NAT-lncRNA	III
MSTRG.13094	Chr4(NC_025996.1)	45011527	45014328	-	2802	606	0.345021	class_code "x"	NAT-lncRNA	III
MSTRG.13113	Chr4(NC_025996.1)	45308556	45313181	+	4626	212	0.513284	class_code "i"	Intronic-lncRNA	-
MSTRG.13203	Chr4(NC_025996.1)	46588099	46591528	+	3430	672	1.29896	class_code "u"	lincRNA	-
MSTRG.13232	Chr4(NC_025996.1)	46824455	46826412	-	1958	1835	0.898015	class_code "u"	lincRNA	-
MSTRG.13255	Chr4(NC_025996.1)	47136903	47141301	+	4399	3405	0.675853	class_code "u"	lincRNA	-
MSTRG.13270	Chr4(NC_025996.1)	47287127	47287756	-	630	318	0.250995	class_code "u"	lincRNA	-
MSTRG.13306	Chr4(NC_025996.1)	47906341	47913539	+	7199	6923	0.740949	class_code "u"	lincRNA	-
MSTRG.13309	Chr4(NC_025996.1)	47950346	47953285	-	2940	1171	0.1654	class_code "x"	NAT-lncRNA	VI
MSTRG.13318	Chr4(NC_025996.1)	48020938	48021670	+	733	637	0.475452	class_code "u"	lincRNA	-
MSTRG.13346	Chr4(NC_025996.1)	48278489	48288912	-	10424	4379	2.75009	class_code "u"	lincRNA	-
MSTRG.13398	Chr4(NC_025996.1)	48949669	48952085	+	2417	2328	0.436212	class_code "u"	lincRNA	-
MSTRG.13420	Chr4(NC_025996.1)	49296669	49297711	+	1043	960	0.432127	class_code "u"	lincRNA	-
MSTRG.13469	Chr4(NC_025996.1)	50099798	50102542	-	2745	2677	1.94256	class_code "x"	NAT-lncRNA	III
MSTRG.13490	Chr4(NC_025996.1)	50273870	50275527	+	1658	790	0.641355	class_code "u"	lincRNA	-
MSTRG.13496	Chr4(NC_025996.1)	50308766	50313234	+	4469	948	1.33234	class_code "u"	lincRNA	-
MSTRG.13498	Chr4(NC_025996.1)	50314787	50315284	+	498	409	0.972212	class_code "u"	lincRNA	-
MSTRG.13497	Chr4(NC_025996.1)	50315080	50320487	-	5408	285	0.92118	class_code "u"	lincRNA	-
MSTRG.13500	Chr4(NC_025996.1)	50319898	50320487	+	590	501	2.09049	class_code "u"	lincRNA	-
MSTRG.13525	Chr4(NC_025996.1)	50670571	50710734	-	40164	247	0.507394	class_code "x"	NAT-lncRNA	II
MSTRG.13556	Chr4(NC_025996.1)	51167915	51168821	+	907	701	0.333445	class_code "u"	lincRNA	-
MSTRG.13612	Chr4(NC_025996.1)	52086294	52086695	-	402	305	359.694	class_code "x"	NAT-lncRNA	II
MSTRG.13617	Chr4(NC_025996.1)	52217618	52235246	-	17629	287	7.09838	class_code "x"	NAT-lncRNA	III
MSTRG.13625	Chr4(NC_025996.1)	52409651	52416623	+	6973	2829	2.35426	class_code "x"	NAT-lncRNA	V
MSTRG.13658	Chr4(NC_025996.1)	53010542	53011421	+	880	830	0.154612	class_code "u"	lincRNA	-
MSTRG.13684	Chr4(NC_025996.1)	53263533	53268867	+	5335	773	0.648268	class_code "x"	NAT-lncRNA	V
MSTRG.13685	Chr4(NC_025996.1)	53269825	53275402	+	5578	5168	8.39221	class_code "u"	lincRNA	-
MSTRG.13766	Chr4(NC_025996.1)	54467041	54479801	-	12761	959	1.50613	class_code "x"	NAT-lncRNA	VI
MSTRG.13788	Chr4(NC_025996.1)	54789763	54790054	+	292	269	0.839378	class_code "x"	NAT-lncRNA	III
MSTRG.13818	Chr4(NC_025996.1)	55312251	55374350	+	62100	1133	2.28644	class_code "x"	NAT-lncRNA	I
MSTRG.13825	Chr4(NC_025996.1)	55624607	55625404	+	798	717	0.760923	class_code "x"	NAT-lncRNA	III
MSTRG.13832	Chr4(NC_025996.1)	55720465	55756610	-	36146	1144	0.530511	class_code "x"	NAT-lncRNA	I
MSTRG.13833	Chr4(NC_025996.1)	55721493	55722133	+	641	506	0.646653	class_code "u"	lincRNA	-
MSTRG.13879	Chr4(NC_025996.1)	56320633	56326148	-	5516	678	1.02684	class_code "o"	Sense-lncRNA	-
MSTRG.13880	Chr4(NC_025996.1)	56323462	56327500	+	4039	355	0.22408	class_code "x"	NAT-lncRNA	III
MSTRG.13883	Chr4(NC_025996.1)	56329071	56329558	+	488	263	0.924805	class_code "x"	NAT-lncRNA	III
MSTRG.13913	Chr4(NC_025996.1)	56819827	56821063	+	1237	354	4.43415	class_code "u"	lincRNA	-
MSTRG.14164	Chr5(NC_025997.1)	2489671	2490261	-	591	475	0.501621	class_code "u"	lincRNA	-
MSTRG.14178	Chr5(NC_025997.1)	2664698	2666537	+	1840	1793	0.836169	class_code "x"	NAT-lncRNA	VI
MSTRG.14235	Chr5(NC_025997.1)	3318105	3318527	+	423	401	0.176674	class_code "x"	NAT-lncRNA	III
MSTRG.14243	Chr5(NC_025997.1)	3426791	3431627	-	4837	4666	1.07969	class_code "o"	Sense-lncRNA	-
MSTRG.14263	Chr5(NC_025997.1)	3652860	3658400	+	5541	525	1.57106	class_code "x"	NAT-lncRNA	II
MSTRG.14283	Chr5(NC_025997.1)	3820142	3822156	+	2015	1933	0.398827	class_code "u"	lincRNA	-
MSTRG.14426	Chr5(NC_025997.1)	5631420	5632204	-	785	765	2.08222	class_code "x"	NAT-lncRNA	III
MSTRG.14569	Chr5(NC_025997.1)	7421283	7424897	-	3615	497	12.6528	class_code "u"	lincRNA	-
MSTRG.14615	Chr5(NC_025997.1)	8376338	8393813	+	17476	1445	0.370744	class_code "x"	NAT-lncRNA	IV
MSTRG.14643	Chr5(NC_025997.1)	8867488	8868180	-	693	622	0.787342	class_code "x"	NAT-lncRNA	VI
MSTRG.14673	Chr5(NC_025997.1)	9229102	9230565	+	1464	588	0.410755	class_code "x"	NAT-lncRNA	III
MSTRG.14683	Chr5(NC_025997.1)	9486942	9491538	-	4597	1851	1.01794	class_code "u"	lincRNA	-
MSTRG.14713	Chr5(NC_025997.1)	10024052	10040468	+	16417	2833	0.568971	class_code "x"	NAT-lncRNA	IV
MSTRG.14744	Chr5(NC_025997.1)	10541614	10542888	-	1275	1216	0.658698	class_code "x"	NAT-lncRNA	II
MSTRG.14772	Chr5(NC_025997.1)	11026229	11027574	-	1346	1005	0.278688	class_code "u"	lincRNA	-
MSTRG.14860	Chr5(NC_025997.1)	12359471	12367292	-	7822	1854	0.421749	class_code "u"	lincRNA	-
MSTRG.14862	Chr5(NC_025997.1)	12373816	12374229	+	414	339	0.491924	class_code "x"	NAT-lncRNA	VI
MSTRG.14885	Chr5(NC_025997.1)	12725923	12726959	+	1037	879	0.372033	class_code "u"	lincRNA	-
MSTRG.15025	Chr5(NC_025997.1)	17397087	17397492	+	406	337	0.340553	class_code "x"	NAT-lncRNA	III
MSTRG.15044	Chr5(NC_025997.1)	17806401	17809342	-	2942	1187	0.339372	class_code "x"	NAT-lncRNA	VI
MSTRG.15136	Chr5(NC_025997.1)	20258590	20293005	+	34416	756	1.15314	class_code "u"	lincRNA	-
MSTRG.15153	Chr5(NC_025997.1)	20736097	20741122	-	5026	915	0.355427	class_code "x"	NAT-lncRNA	III
MSTRG.15225	Chr5(NC_025997.1)	22676908	22679168	+	2261	655	0.829828	class_code "u"	lincRNA	-
MSTRG.15267	Chr5(NC_025997.1)	24825686	24860508	+	34823	781	0.776623	class_code "u"	lincRNA	-
MSTRG.15276	Chr5(NC_025997.1)	24947641	24950570	-	2930	2851	0.508711	class_code "x"	NAT-lncRNA	VI
MSTRG.15280	Chr5(NC_025997.1)	25014621	25014975	+	355	295	0.50693	class_code "x"	NAT-lncRNA	III
MSTRG.15295	Chr5(NC_025997.1)	25374435	25381399	+	6965	291	1.19798	class_code "u"	lincRNA	-
MSTRG.15330	Chr5(NC_025997.1)	27271421	27281312	+	9892	705	0.445408	class_code "u"	lincRNA	-
MSTRG.15551	Chr5(NC_025997.1)	33131784	33132304	-	521	240	0.253502	class_code "x"	NAT-lncRNA	VI
MSTRG.15557	Chr5(NC_025997.1)	33215036	33216228	+	1193	1111	0.581472	class_code "x"	NAT-lncRNA	III
MSTRG.15571	Chr5(NC_025997.1)	33436757	33437194	-	438	354	6.36698	class_code "u"	lincRNA	-
MSTRG.15584	Chr5(NC_025997.1)	33545768	33549746	-	3979	3191	0.672075	class_code "u"	lincRNA	-
MSTRG.15597	Chr5(NC_025997.1)	34019513	34024837	-	5325	2146	0.816987	class_code "u"	lincRNA	-
MSTRG.15621	Chr5(NC_025997.1)	34770655	34772252	+	1598	265	0.179826	class_code "u"	lincRNA	-
MSTRG.15706	Chr5(NC_025997.1)	37149122	37149838	-	717	631	0.6153	class_code "u"	lincRNA	-
MSTRG.15759	Chr5(NC_025997.1)	38237302	38243200	+	5899	4329	1.04219	class_code "u"	lincRNA	-
MSTRG.15767	Chr5(NC_025997.1)	38310902	38311431	+	530	461	0.173952	class_code "u"	lincRNA	-
MSTRG.15774	Chr5(NC_025997.1)	38434981	38437114	+	2134	1404	0.217929	class_code "u"	lincRNA	-
MSTRG.15801	Chr5(NC_025997.1)	39243878	39264522	-	20645	889	4.79991	class_code "x"	NAT-lncRNA	VI
MSTRG.15861	Chr5(NC_025997.1)	40134054	40143415	-	9362	284	0.864602	class_code "x"	NAT-lncRNA	II
MSTRG.15864	Chr5(NC_025997.1)	40171385	40171714	-	330	216	0.144433	class_code "x"	NAT-lncRNA	III
MSTRG.15884	Chr5(NC_025997.1)	40460897	40471079	-	10183	2527	20.5215	class_code "u"	lincRNA	-
MSTRG.15915	Chr5(NC_025997.1)	40979071	41000835	+	21765	4265	0.900684	class_code "u"	lincRNA	-
MSTRG.15957	Chr5(NC_025997.1)	41552898	41555185	-	2288	496	0.562086	class_code "x"	NAT-lncRNA	I
MSTRG.15963	Chr5(NC_025997.1)	41700747	41703225	-	2479	2081	1.687	class_code "x"	NAT-lncRNA	III
MSTRG.15968	Chr5(NC_025997.1)	41734145	41734920	-	776	600	1.48304	class_code "x"	NAT-lncRNA	III
MSTRG.16002	Chr5(NC_025997.1)	42182089	42187133	-	5045	562	0.649115	class_code "x"	NAT-lncRNA	VI
MSTRG.16071	Chr5(NC_025997.1)	43158070	43158375	+	306	239	1.59828	class_code "x"	NAT-lncRNA	III
MSTRG.16096	Chr5(NC_025997.1)	43574361	43582028	+	7668	6465	0.34052	class_code "u"	lincRNA	-
MSTRG.16123	Chr5(NC_025997.1)	43849983	43851532	-	1550	1419	0.383841	class_code "x"	NAT-lncRNA	III
MSTRG.16154	Chr5(NC_025997.1)	44156125	44160542	-	4418	4132	5.58326	class_code "u"	lincRNA	-
MSTRG.16214	Chr5(NC_025997.1)	45009382	45009715	-	334	272	0.173674	class_code "x"	NAT-lncRNA	III
MSTRG.16216	Chr5(NC_025997.1)	45020664	45028998	+	8335	2529	0.450422	class_code "x"	NAT-lncRNA	II
MSTRG.16321	Chr5(NC_025997.1)	46488443	46488758	+	316	292	0.98542	class_code "x"	NAT-lncRNA	III
MSTRG.16331	Chr5(NC_025997.1)	46645014	46646713	+	1700	1609	0.696953	class_code "i"	Intronic-lncRNA	-
MSTRG.16341	Chr5(NC_025997.1)	46738008	46834052	+	96045	1437	0.548286	class_code "x"	NAT-lncRNA	I
MSTRG.16342	Chr5(NC_025997.1)	46738131	46793139	+	55009	2132	9.48711	class_code "x"	NAT-lncRNA	III
MSTRG.16344	Chr5(NC_025997.1)	46792855	46835887	+	43033	1341	4.23542	class_code "x"	NAT-lncRNA	I
MSTRG.16345	Chr5(NC_025997.1)	46794298	46804271	+	9974	279	0.378186	class_code "x"	NAT-lncRNA	III
MSTRG.16350	Chr5(NC_025997.1)	46859395	46865071	-	5677	2040	0.850993	class_code "x"	NAT-lncRNA	VI
MSTRG.16355	Chr5(NC_025997.1)	46916376	46916926	-	551	449	0.489039	class_code "x"	NAT-lncRNA	II
MSTRG.16368	Chr5(NC_025997.1)	47067348	47068355	-	1008	344	0.55661	class_code "x"	NAT-lncRNA	III
MSTRG.16541	Chr5(NC_025997.1)	48771909	48772297	+	389	361	0.30737	class_code "x"	NAT-lncRNA	V
MSTRG.16563	Chr5(NC_025997.1)	49043527	49051020	-	7494	3907	1.02212	class_code "u"	lincRNA	-
MSTRG.16567	Chr5(NC_025997.1)	49118330	49118691	-	362	248	1.50264	class_code "x"	NAT-lncRNA	III
MSTRG.16580	Chr5(NC_025997.1)	49299931	49304061	-	4131	3128	0.743108	class_code "x"	NAT-lncRNA	II
MSTRG.16589	Chr5(NC_025997.1)	49421611	49422738	-	1128	1015	0.314283	class_code "x"	NAT-lncRNA	III
MSTRG.16594	Chr5(NC_025997.1)	49439811	49440369	-	559	488	1.92253	class_code "x"	NAT-lncRNA	I
MSTRG.16595	Chr5(NC_025997.1)	49440564	49441194	-	631	565	2.37499	class_code "x"	NAT-lncRNA	III
MSTRG.16616	Chr5(NC_025997.1)	49671474	49671721	+	248	203	3.1196	class_code "x"	NAT-lncRNA	III
MSTRG.16618	Chr5(NC_025997.1)	49704590	49705006	-	417	315	0.374548	class_code "x"	NAT-lncRNA	I
MSTRG.16625	Chr5(NC_025997.1)	49750582	49751137	+	556	517	0.758233	class_code "x"	NAT-lncRNA	III
MSTRG.16647	Chr5(NC_025997.1)	49967989	49980493	-	12505	655	0.983154	class_code "u"	lincRNA	-
MSTRG.16686	Chr5(NC_025997.1)	50435121	50436546	-	1426	1312	0.360263	class_code "o"	Sense-lncRNA	-
MSTRG.16727	Chr5(NC_025997.1)	50920351	50921677	+	1327	641	0.571832	class_code "o"	Sense-lncRNA	-
MSTRG.16990	Chr6(NC_025998.1)	3128251	3128924	-	674	532	0.241017	class_code "u"	lincRNA	-
MSTRG.16997	Chr6(NC_025998.1)	3209368	3209817	-	450	307	0.754647	class_code "x"	NAT-lncRNA	II
MSTRG.17004	Chr6(NC_025998.1)	3252628	3255053	-	2426	2325	0.764359	class_code "x"	NAT-lncRNA	III
MSTRG.17027	Chr6(NC_025998.1)	3572180	3572947	+	768	689	0.139962	class_code "u"	lincRNA	-
MSTRG.17032	Chr6(NC_025998.1)	3643924	3647773	-	3850	1562	0.624321	class_code "u"	lincRNA	-
MSTRG.17049	Chr6(NC_025998.1)	3909126	3910848	+	1723	1663	0.224795	class_code "u"	lincRNA	-
MSTRG.17067	Chr6(NC_025998.1)	4174601	4192838	+	18238	3949	2.27202	class_code "x"	NAT-lncRNA	II
MSTRG.17117	Chr6(NC_025998.1)	4962018	5088221	+	126204	358	3.26265	class_code "x"	NAT-lncRNA	I
MSTRG.17118	Chr6(NC_025998.1)	4973261	5089036	+	115776	748	0.803689	class_code "x"	NAT-lncRNA	I
MSTRG.17173	Chr6(NC_025998.1)	5863877	5865920	-	2044	2013	0.445342	class_code "x"	NAT-lncRNA	III
MSTRG.17188	Chr6(NC_025998.1)	6236654	6237674	+	1021	381	29.3742	class_code "u"	lincRNA	-
MSTRG.17217	Chr6(NC_025998.1)	6878022	6880608	-	2587	2284	1.65769	class_code "x"	NAT-lncRNA	III
MSTRG.17250	Chr6(NC_025998.1)	8001017	8002252	+	1236	1150	0.652757	class_code "x"	NAT-lncRNA	III
MSTRG.17261	Chr6(NC_025998.1)	8594755	8598643	+	3889	224	0.272088	class_code "u"	lincRNA	-
MSTRG.17271	Chr6(NC_025998.1)	9007412	9009992	+	2581	2311	0.196322	class_code "x"	NAT-lncRNA	III
MSTRG.17302	Chr6(NC_025998.1)	10169957	10171234	+	1278	1152	0.374495	class_code "x"	NAT-lncRNA	III
MSTRG.17366	Chr6(NC_025998.1)	13219598	13234956	-	15359	2878	1.38243	class_code "u"	lincRNA	-
MSTRG.17400	Chr6(NC_025998.1)	14402911	14414184	-	11274	1355	0.186478	class_code "x"	NAT-lncRNA	VI
MSTRG.17403	Chr6(NC_025998.1)	14412170	14414184	+	2015	1861	1.32967	class_code "u"	lincRNA	-
MSTRG.17550	Chr6(NC_025998.1)	18959031	18959914	+	884	495	0.323465	class_code "i"	Intronic-lncRNA	-
MSTRG.17578	Chr6(NC_025998.1)	19785226	19788105	-	2880	302	0.26163	class_code "u"	lincRNA	-
MSTRG.17615	Chr6(NC_025998.1)	20775746	20779343	+	3598	227	0.471102	class_code "u"	lincRNA	-
MSTRG.17638	Chr6(NC_025998.1)	21101190	21108926	-	7737	744	0.304837	class_code "u"	lincRNA	-
MSTRG.17644	Chr6(NC_025998.1)	21506007	21556223	+	50217	1024	3.19657	class_code "x"	NAT-lncRNA	IV
MSTRG.17699	Chr6(NC_025998.1)	22734947	22735920	+	974	354	0.202302	class_code "x"	NAT-lncRNA	III
MSTRG.17721	Chr6(NC_025998.1)	24261445	24264946	+	3502	342	0.188084	class_code "x"	NAT-lncRNA	II
MSTRG.17727	Chr6(NC_025998.1)	24487974	24490046	-	2073	1985	1.76186	class_code "u"	lincRNA	-
MSTRG.17816	Chr6(NC_025998.1)	27257974	27258340	-	367	268	0.240018	class_code "u"	lincRNA	-
MSTRG.17892	Chr6(NC_025998.1)	29082492	29085584	+	3093	2862	0.33805	class_code "x"	NAT-lncRNA	III
MSTRG.17903	Chr6(NC_025998.1)	29219127	29221150	-	2024	821	8.46443	class_code "u"	lincRNA	-
MSTRG.17928	Chr6(NC_025998.1)	29441322	29442037	+	716	655	0.142675	class_code "u"	lincRNA	-
MSTRG.17949	Chr6(NC_025998.1)	29632771	29635612	-	2842	1724	5.37673	class_code "u"	lincRNA	-
MSTRG.17958	Chr6(NC_025998.1)	29738657	29739251	-	595	492	0.618844	class_code "u"	lincRNA	-
MSTRG.17965	Chr6(NC_025998.1)	29911006	29913723	-	2718	404	0.928413	class_code "o"	Sense-lncRNA	-
MSTRG.17988	Chr6(NC_025998.1)	30426906	30427858	+	953	729	3.41559	class_code "x"	NAT-lncRNA	V
MSTRG.18005	Chr6(NC_025998.1)	30725033	30725561	+	529	476	0.829061	class_code "x"	NAT-lncRNA	III
MSTRG.18156	Chr6(NC_025998.1)	34345007	34346648	+	1642	386	1.99349	class_code "x"	NAT-lncRNA	II
MSTRG.18190	Chr6(NC_025998.1)	34747656	34751960	-	4305	379	0.254018	class_code "u"	lincRNA	-
MSTRG.18217	Chr6(NC_025998.1)	35321011	35322388	-	1378	486	2.29935	class_code "u"	lincRNA	-
MSTRG.18243	Chr6(NC_025998.1)	35609143	35614733	-	5591	3323	1.25777	class_code "u"	lincRNA	-
MSTRG.18268	Chr6(NC_025998.1)	35832119	35834693	+	2575	2536	0.740792	class_code "x"	NAT-lncRNA	III
MSTRG.18286	Chr6(NC_025998.1)	36034470	36036410	+	1941	1822	0.202961	class_code "x"	NAT-lncRNA	VI
MSTRG.18348	Chr6(NC_025998.1)	36867825	36868530	+	706	665	2.00181	class_code "x"	NAT-lncRNA	III
MSTRG.18449	Chr6(NC_025998.1)	38406184	38406763	+	580	344	0.602266	class_code "x"	NAT-lncRNA	II
MSTRG.18458	Chr6(NC_025998.1)	38556710	38557005	-	296	275	2.49697	class_code "x"	NAT-lncRNA	III
MSTRG.18499	Chr6(NC_025998.1)	39061626	39067116	+	5491	2377	0.334975	class_code "u"	lincRNA	-
MSTRG.18545	Chr6(NC_025998.1)	40108963	40109495	+	533	371	0.712457	class_code "x"	NAT-lncRNA	VI
MSTRG.18553	Chr6(NC_025998.1)	40178430	40180390	+	1961	1812	0.4262	class_code "x"	NAT-lncRNA	III
MSTRG.18557	Chr6(NC_025998.1)	40269964	40270688	+	725	695	0.110987	class_code "u"	lincRNA	-
MSTRG.18558	Chr6(NC_025998.1)	40270062	40270688	-	627	518	0.176062	class_code "u"	lincRNA	-
MSTRG.18575	Chr6(NC_025998.1)	40535099	40537724	+	2626	253	0.156151	class_code "o"	Sense-lncRNA	-
MSTRG.18613	Chr6(NC_025998.1)	41099304	41099637	-	334	266	0.310138	class_code "x"	NAT-lncRNA	III
MSTRG.18648	Chr6(NC_025998.1)	41351337	41353400	+	2064	2032	0.686406	class_code "x"	NAT-lncRNA	III
MSTRG.18731	Chr6(NC_025998.1)	42313767	42316019	+	2253	386	0.47254	class_code "x"	NAT-lncRNA	III
MSTRG.18737	Chr6(NC_025998.1)	42367235	42369394	+	2160	596	0.885347	class_code "x"	NAT-lncRNA	I
MSTRG.18766	Chr6(NC_025998.1)	42718735	42720808	-	2074	1888	5.44939	class_code "x"	NAT-lncRNA	III
MSTRG.18822	Chr6(NC_025998.1)	43601839	43603721	-	1883	1863	7.26572	class_code "x"	NAT-lncRNA	III
MSTRG.18860	Chr6(NC_025998.1)	44189974	44192767	-	2794	279	0.818096	class_code "u"	lincRNA	-
MSTRG.18891	Chr7(NC_025999.1)	338979	340498	-	1520	1445	0.209488	class_code "o"	Sense-lncRNA	-
MSTRG.18914	Chr7(NC_025999.1)	795798	797107	-	1310	979	0.373202	class_code "u"	lincRNA	-
MSTRG.18935	Chr7(NC_025999.1)	1075886	1076734	-	849	681	0.535253	class_code "u"	lincRNA	-
MSTRG.18979	Chr7(NC_025999.1)	1479564	1480885	+	1322	1099	0.561891	class_code "x"	NAT-lncRNA	VI
MSTRG.19003	Chr7(NC_025999.1)	1870833	1888349	+	17517	1265	6.99751	class_code "x"	NAT-lncRNA	II
MSTRG.19221	Chr7(NC_025999.1)	4648801	4658878	+	10078	204	0.254356	class_code "x"	NAT-lncRNA	II
MSTRG.19244	Chr7(NC_025999.1)	4970943	4981148	+	10206	861	0.58908	class_code "u"	lincRNA	-
MSTRG.19259	Chr7(NC_025999.1)	5228146	5228400	-	255	207	0.194218	class_code "x"	NAT-lncRNA	I
MSTRG.19344	Chr7(NC_025999.1)	6306434	6306802	-	369	250	0.189115	class_code "u"	lincRNA	-
MSTRG.19402	Chr7(NC_025999.1)	7172450	7173145	-	696	468	0.481086	class_code "o"	Sense-lncRNA	-
MSTRG.19457	Chr7(NC_025999.1)	7820149	7830474	-	10326	3814	0.670072	class_code "u"	lincRNA	-
MSTRG.19492	Chr7(NC_025999.1)	8297901	8311198	+	13298	249	1.22579	class_code "x"	NAT-lncRNA	III
MSTRG.19501	Chr7(NC_025999.1)	8402574	8411636	-	9063	1244	0.242295	class_code "o"	Sense-lncRNA	-
MSTRG.19567	Chr7(NC_025999.1)	9527024	9527639	-	616	559	0.142976	class_code "x"	NAT-lncRNA	III
MSTRG.19685	Chr7(NC_025999.1)	11171841	11177429	-	5589	931	1.03212	class_code "x"	NAT-lncRNA	III
MSTRG.19686	Chr7(NC_025999.1)	11177530	11253097	-	75568	463	0.514622	class_code "x"	NAT-lncRNA	II
MSTRG.19769	Chr7(NC_025999.1)	12017360	12018339	-	980	224	0.213938	class_code "x"	NAT-lncRNA	III
MSTRG.19779	Chr7(NC_025999.1)	12140024	12140419	+	396	304	0.153406	class_code "u"	lincRNA	-
MSTRG.19796	Chr7(NC_025999.1)	12348448	12357153	+	8706	354	0.722122	class_code "x"	NAT-lncRNA	II
MSTRG.19883	Chr7(NC_025999.1)	13318686	13319322	+	637	599	0.801645	class_code "x"	NAT-lncRNA	III
MSTRG.19914	Chr7(NC_025999.1)	13846465	13848162	-	1698	773	0.436668	class_code "u"	lincRNA	-
MSTRG.19916	Chr7(NC_025999.1)	13881058	13882694	-	1637	230	0.209522	class_code "u"	lincRNA	-
MSTRG.20121	Chr7(NC_025999.1)	17492789	17493888	+	1100	954	0.385511	class_code "u"	lincRNA	-
MSTRG.20123	Chr7(NC_025999.1)	17521487	17524712	-	3226	2668	1.18198	class_code "u"	lincRNA	-
MSTRG.20128	Chr7(NC_025999.1)	17570662	17573266	+	2605	2568	0.681051	class_code "x"	NAT-lncRNA	III
MSTRG.20275	Chr7(NC_025999.1)	20307559	20308134	-	576	539	0.196217	class_code "x"	NAT-lncRNA	VI
MSTRG.20300	Chr7(NC_025999.1)	21047454	21051715	-	4262	4237	0.929563	class_code "x"	NAT-lncRNA	III
MSTRG.20302	Chr7(NC_025999.1)	21061603	21062698	+	1096	949	0.243958	class_code "x"	NAT-lncRNA	VI
MSTRG.20304	Chr7(NC_025999.1)	21077915	21085480	-	7566	371	14.2542	class_code "u"	lincRNA	-
MSTRG.20397	Chr7(NC_025999.1)	23545085	23545694	-	610	499	0.193146	class_code "u"	lincRNA	-
MSTRG.20449	Chr7(NC_025999.1)	26117526	26118864	-	1339	208	0.231941	class_code "x"	NAT-lncRNA	VI
MSTRG.20460	Chr7(NC_025999.1)	26424699	26433602	+	8904	645	2.17746	class_code "u"	lincRNA	-
MSTRG.20624	Chr7(NC_025999.1)	30848078	30857458	-	9381	4934	0.99427	class_code "u"	lincRNA	-
MSTRG.20630	Chr7(NC_025999.1)	31341291	31352358	-	11068	10645	7.62889	class_code "u"	lincRNA	-
MSTRG.20631	Chr7(NC_025999.1)	31341291	31352358	+	11068	10645	0.262747	class_code "u"	lincRNA	-
MSTRG.20632	Chr7(NC_025999.1)	31352907	31355187	-	2281	2179	1.17025	class_code "u"	lincRNA	-
MSTRG.20757	Chr7(NC_025999.1)	36555275	36592294	-	37020	2355	1.13274	class_code "u"	lincRNA	-
MSTRG.20789	Chr7(NC_025999.1)	37136604	37140789	-	4186	1312	2.05102	class_code "x"	NAT-lncRNA	I
MSTRG.20791	Chr7(NC_025999.1)	37141061	37151658	-	10598	1025	4.05512	class_code "x"	NAT-lncRNA	II
MSTRG.20813	Chr7(NC_025999.1)	37551871	37552544	-	674	638	0.295242	class_code "u"	lincRNA	-
MSTRG.20827	Chr7(NC_025999.1)	37778966	37791309	-	12344	669	2.7781	class_code "x"	NAT-lncRNA	II
MSTRG.20862	Chr7(NC_025999.1)	38742062	38743629	-	1568	1393	2.09017	class_code "x"	NAT-lncRNA	VI
MSTRG.20866	Chr7(NC_025999.1)	38761146	38761478	-	333	264	1.21259	class_code "x"	NAT-lncRNA	III
MSTRG.20874	Chr7(NC_025999.1)	39076007	39077665	-	1659	906	0.457942	class_code "x"	NAT-lncRNA	I
MSTRG.21000	Chr7(NC_025999.1)	41279741	41282127	-	2387	1919	0.752758	class_code "u"	lincRNA	-
MSTRG.21016	Chr7(NC_025999.1)	41543825	41545405	-	1581	679	1.86224	class_code "o"	Sense-lncRNA	-
MSTRG.21019	Chr7(NC_025999.1)	41648900	41651258	+	2359	2273	0.310858	class_code "u"	lincRNA	-
MSTRG.21045	Chr7(NC_025999.1)	42067850	42074253	-	6404	1278	0.205178	class_code "x"	NAT-lncRNA	IV
MSTRG.21172	Chr8(NC_026000.1)	1167781	1168281	-	501	207	0.231507	class_code "u"	lincRNA	-
MSTRG.21174	Chr8(NC_026000.1)	1179753	1181827	-	2075	1819	5.35004	class_code "u"	lincRNA	-
MSTRG.21178	Chr8(NC_026000.1)	1227418	1228558	-	1141	983	0.287052	class_code "x"	NAT-lncRNA	VI
MSTRG.21195	Chr8(NC_026000.1)	1581161	1582982	+	1822	934	0.366838	class_code "u"	lincRNA	-
MSTRG.21255	Chr8(NC_026000.1)	2403974	2404361	+	388	221	2.20953	class_code "x"	NAT-lncRNA	III
MSTRG.21260	Chr8(NC_026000.1)	2469306	2470404	-	1099	500	0.421649	class_code "u"	lincRNA	-
MSTRG.21311	Chr8(NC_026000.1)	3802356	3802726	+	371	340	0.346534	class_code "u"	lincRNA	-
MSTRG.21376	Chr8(NC_026000.1)	4870764	4878642	+	7879	1123	0.562723	class_code "x"	NAT-lncRNA	VI
MSTRG.21389	Chr8(NC_026000.1)	5103416	5105746	+	2331	436	0.499466	class_code "x"	NAT-lncRNA	III
MSTRG.21440	Chr8(NC_026000.1)	5863377	5868270	-	4894	347	0.401181	class_code "x"	NAT-lncRNA	III
MSTRG.21478	Chr8(NC_026000.1)	6661564	6661983	+	420	306	0.156258	class_code "u"	lincRNA	-
MSTRG.21486	Chr8(NC_026000.1)	6914502	7026872	-	112371	523	1.53474	class_code "u"	lincRNA	-
MSTRG.21489	Chr8(NC_026000.1)	7112269	7112792	+	524	481	0.838057	class_code "x"	NAT-lncRNA	III
MSTRG.21491	Chr8(NC_026000.1)	7132199	7132640	+	442	298	1.09025	class_code "x"	NAT-lncRNA	III
MSTRG.21504	Chr8(NC_026000.1)	7223383	7231019	-	7637	3164	0.54719	class_code "u"	lincRNA	-
MSTRG.21506	Chr8(NC_026000.1)	7236384	7241614	+	5231	2623	0.367136	class_code "u"	lincRNA	-
MSTRG.21552	Chr8(NC_026000.1)	8268630	8296233	+	27604	1514	2.2794	class_code "x"	NAT-lncRNA	VI
MSTRG.21554	Chr8(NC_026000.1)	8296518	8298375	+	1858	865	0.779583	class_code "x"	NAT-lncRNA	III
MSTRG.21649	Chr8(NC_026000.1)	11356864	11358158	+	1295	679	0.265336	class_code "u"	lincRNA	-
MSTRG.21651	Chr8(NC_026000.1)	11359813	11360844	+	1032	858	0.171745	class_code "u"	lincRNA	-
MSTRG.21756	Chr8(NC_026000.1)	15824919	15837772	-	12854	2277	0.693933	class_code "x"	NAT-lncRNA	I
MSTRG.21758	Chr8(NC_026000.1)	15844282	15844732	+	451	406	0.354896	class_code "i"	Intronic-lncRNA	-
MSTRG.21847	Chr8(NC_026000.1)	17994326	17995125	-	800	247	0.227437	class_code "x"	NAT-lncRNA	III
MSTRG.21856	Chr8(NC_026000.1)	18311867	18343465	-	31599	1529	0.420278	class_code "u"	lincRNA	-
MSTRG.21875	Chr8(NC_026000.1)	18761665	18767809	+	6145	1134	0.309003	class_code "u"	lincRNA	-
MSTRG.21905	Chr8(NC_026000.1)	19696263	19700720	+	4458	4187	0.476291	class_code "x"	NAT-lncRNA	III
MSTRG.21939	Chr8(NC_026000.1)	20448890	20449230	-	341	312	0.204451	class_code "x"	NAT-lncRNA	VI
MSTRG.21976	Chr8(NC_026000.1)	21422290	21423007	-	718	675	0.949864	class_code "x"	NAT-lncRNA	VI
MSTRG.21994	Chr8(NC_026000.1)	21877179	21877628	-	450	203	4.89896	class_code "x"	NAT-lncRNA	II
MSTRG.22099	Chr8(NC_026000.1)	23969180	23970228	+	1049	270	0.149297	class_code "u"	lincRNA	-
MSTRG.22196	Chr8(NC_026000.1)	25163181	25163847	+	667	639	0.907997	class_code "x"	NAT-lncRNA	III
MSTRG.22217	Chr8(NC_026000.1)	25452664	25456443	+	3780	2380	0.939476	class_code "u"	lincRNA	-
MSTRG.22224	Chr8(NC_026000.1)	25541005	25543436	+	2432	1517	2.0324	class_code "x"	NAT-lncRNA	III
MSTRG.22449	Chr8(NC_026000.1)	29090852	29093526	-	2675	793	0.349103	class_code "x"	NAT-lncRNA	VI
MSTRG.22518	Chr8(NC_026000.1)	30159369	30168027	-	8659	273	0.479098	class_code "x"	NAT-lncRNA	V
MSTRG.22548	Chr8(NC_026000.1)	30547179	30547545	+	367	293	0.868402	class_code "x"	NAT-lncRNA	III
MSTRG.22613	Chr8(NC_026000.1)	31206126	31207251	+	1126	463	0.363535	class_code "x"	NAT-lncRNA	II
MSTRG.22620	Chr8(NC_026000.1)	31336222	31357900	+	21679	716	1.23828	class_code "x"	NAT-lncRNA	VI
MSTRG.22651	Chr8(NC_026000.1)	31715634	31716138	+	505	481	0.517207	class_code "x"	NAT-lncRNA	III
MSTRG.22652	Chr8(NC_026000.1)	31726456	31739985	-	13530	1159	0.630518	class_code "o"	Sense-lncRNA	-
MSTRG.22671	Chr8(NC_026000.1)	31972726	31973424	-	699	253	2.37017	class_code "x"	NAT-lncRNA	III
MSTRG.22677	Chr8(NC_026000.1)	32027336	32027679	+	344	296	7.65799	class_code "x"	NAT-lncRNA	III
MSTRG.22718	Chr8(NC_026000.1)	32684922	32695658	+	10737	313	0.28264	class_code "x"	NAT-lncRNA	II
MSTRG.22749	Chr8(NC_026000.1)	33050641	33062385	+	11745	723	4.63925	class_code "u"	lincRNA	-
MSTRG.22839	Chr8(NC_026000.1)	34461630	34465502	+	3873	859	4.91915	class_code "u"	lincRNA	-
MSTRG.22861	Chr8(NC_026000.1)	34602439	34602822	+	384	259	0.826	class_code "u"	lincRNA	-
MSTRG.22905	Chr8(NC_026000.1)	35241298	35243207	-	1910	574	0.605147	class_code "x"	NAT-lncRNA	III
MSTRG.22944	Chr8(NC_026000.1)	35715167	35720282	-	5116	5035	4.93593	class_code "u"	lincRNA	-
MSTRG.22961	Chr8(NC_026000.1)	35988193	35989684	+	1492	799	3.77885	class_code "x"	NAT-lncRNA	VI
MSTRG.23019	Chr8(NC_026000.1)	36715776	36727059	-	11284	359	0.26817	class_code "x"	NAT-lncRNA	VI
MSTRG.23077	Chr8(NC_026000.1)	37276588	37277574	-	987	332	0.646316	class_code "u"	lincRNA	-
MSTRG.23116	Chr8(NC_026000.1)	37781906	37783651	+	1746	249	4.46892	class_code "u"	lincRNA	-
MSTRG.23137	Chr8(NC_026000.1)	38055225	38058419	+	3195	1244	0.772002	class_code "x"	NAT-lncRNA	III
MSTRG.23236	Chr8(NC_026000.1)	39301816	39311144	-	9329	4030	0.867405	class_code "u"	lincRNA	-
MSTRG.23329	Chr9(NC_026001.1)	380617	398682	-	18066	882	2.41938	class_code "x"	NAT-lncRNA	IV
MSTRG.23421	Chr9(NC_026001.1)	2191060	2191393	+	334	298	3.09572	class_code "x"	NAT-lncRNA	III
MSTRG.23445	Chr9(NC_026001.1)	2673135	2673791	-	657	307	0.554302	class_code "x"	NAT-lncRNA	III
MSTRG.23453	Chr9(NC_026001.1)	2804000	2816413	+	12414	2724	1.96483	class_code "x"	NAT-lncRNA	III
MSTRG.23460	Chr9(NC_026001.1)	2950119	2957381	+	7263	470	0.988139	class_code "u"	lincRNA	-
MSTRG.23503	Chr9(NC_026001.1)	3801933	3802398	+	466	407	0.190578	class_code "x"	NAT-lncRNA	III
MSTRG.23505	Chr9(NC_026001.1)	3842200	3846035	+	3836	3761	0.808058	class_code "u"	lincRNA	-
MSTRG.23513	Chr9(NC_026001.1)	4110534	4111288	+	755	729	0.237946	class_code "x"	NAT-lncRNA	VI
MSTRG.23534	Chr9(NC_026001.1)	4477170	4540904	+	63735	301	0.166322	class_code "x"	NAT-lncRNA	II
MSTRG.23566	Chr9(NC_026001.1)	5823946	5848490	+	24545	262	0.268288	class_code "x"	NAT-lncRNA	II
MSTRG.23580	Chr9(NC_026001.1)	6096832	6098980	-	2149	280	0.179765	class_code "u"	lincRNA	-
MSTRG.23599	Chr9(NC_026001.1)	6864973	6868662	-	3690	1036	0.9582	class_code "u"	lincRNA	-
MSTRG.23652	Chr9(NC_026001.1)	8981360	8983839	+	2480	1377	0.311892	class_code "u"	lincRNA	-
MSTRG.23655	Chr9(NC_026001.1)	9190031	9205333	+	15303	7342	3.77319	class_code "u"	lincRNA	-
MSTRG.23685	Chr9(NC_026001.1)	10628870	10630896	+	2027	228	0.329383	class_code "x"	NAT-lncRNA	I
MSTRG.23739	Chr9(NC_026001.1)	13059707	13060018	+	312	291	0.264705	class_code "x"	NAT-lncRNA	III
MSTRG.23771	Chr9(NC_026001.1)	14707180	14708012	+	833	680	0.182155	class_code "u"	lincRNA	-
MSTRG.23859	Chr9(NC_026001.1)	16987363	16990395	+	3033	3009	0.228803	class_code "x"	NAT-lncRNA	V
MSTRG.23915	Chr9(NC_026001.1)	18927501	19336431	-	408931	793	1.13211	class_code "x"	NAT-lncRNA	II
MSTRG.23935	Chr9(NC_026001.1)	19794534	19794916	+	383	306	0.159974	class_code "x"	NAT-lncRNA	III
MSTRG.23968	Chr9(NC_026001.1)	20395295	20396508	+	1214	1174	0.496226	class_code "x"	NAT-lncRNA	III
MSTRG.23989	Chr9(NC_026001.1)	21169541	21170761	-	1221	261	0.563151	class_code "u"	lincRNA	-
MSTRG.24019	Chr9(NC_026001.1)	21934618	21934987	-	370	298	0.519851	class_code "x"	NAT-lncRNA	III
MSTRG.24063	Chr9(NC_026001.1)	22738178	22739042	+	865	803	0.78043	class_code "x"	NAT-lncRNA	III
MSTRG.24117	Chr9(NC_026001.1)	23845453	23868695	+	23243	365	0.555217	class_code "x"	NAT-lncRNA	I
MSTRG.24118	Chr9(NC_026001.1)	23846406	23870107	+	23702	854	7.59373	class_code "x"	NAT-lncRNA	I
MSTRG.24129	Chr9(NC_026001.1)	24475212	24477725	-	2514	1333	1.54403	class_code "u"	lincRNA	-
MSTRG.24267	Chr9(NC_026001.1)	27165483	27170051	+	4569	4104	3.06126	class_code "x"	NAT-lncRNA	VI
MSTRG.24305	Chr9(NC_026001.1)	27711166	27712591	+	1426	1254	0.7131	class_code "o"	Sense-lncRNA	-
MSTRG.24390	Chr9(NC_026001.1)	29279838	29280296	+	459	334	0.238008	class_code "x"	NAT-lncRNA	VI
MSTRG.24431	Chr9(NC_026001.1)	29855398	29867698	-	12301	1012	1.40398	class_code "x"	NAT-lncRNA	II
MSTRG.24528	Chr9(NC_026001.1)	31085142	31085494	+	353	218	0.147534	class_code "x"	NAT-lncRNA	III
MSTRG.24537	Chr9(NC_026001.1)	31169778	31170992	-	1215	1142	0.536709	class_code "x"	NAT-lncRNA	III
MSTRG.24560	Chr9(NC_026001.1)	31456057	31457321	+	1265	1189	0.749468	class_code "x"	NAT-lncRNA	III
MSTRG.24600	Chr9(NC_026001.1)	31975184	31976933	+	1750	1710	3.03223	class_code "x"	NAT-lncRNA	III
MSTRG.24632	Chr9(NC_026001.1)	32401492	32404609	-	3118	527	0.370838	class_code "x"	NAT-lncRNA	II
MSTRG.24651	Chr9(NC_026001.1)	32665217	32665710	-	494	473	0.64234	class_code "x"	NAT-lncRNA	VI
MSTRG.24681	Chr9(NC_026001.1)	33195169	33195478	-	310	208	0.309254	class_code "u"	lincRNA	-
MSTRG.24696	Chr9(NC_026001.1)	33357769	33358792	-	1024	779	0.218401	class_code "x"	NAT-lncRNA	III
MSTRG.24747	Chr9(NC_026001.1)	33872318	33878576	+	6259	1121	4.21305	class_code "x"	NAT-lncRNA	II
MSTRG.24786	Chr9(NC_026001.1)	34338420	34338782	-	363	242	0.973991	class_code "x"	NAT-lncRNA	III
MSTRG.24788	Chr9(NC_026001.1)	34373892	34375581	+	1690	481	1.30968	class_code "x"	NAT-lncRNA	II
MSTRG.24858	Chr9(NC_026001.1)	35632477	35640042	+	7566	210	0.222584	class_code "u"	lincRNA	-
MSTRG.24924	Chr9(NC_026001.1)	37070464	37071258	+	795	695	0.482298	class_code "x"	NAT-lncRNA	V
MSTRG.24938	Chr9(NC_026001.1)	37211990	37215109	+	3120	341	4.88331	class_code "u"	lincRNA	-
MSTRG.24941	Chr9(NC_026001.1)	37219847	37223267	+	3421	2629	0.86737	class_code "x"	NAT-lncRNA	III
MSTRG.24982	Chr9(NC_026001.1)	37597716	37598415	+	700	319	0.226851	class_code "u"	lincRNA	-
MSTRG.24992	Chr9(NC_026001.1)	37759279	37760688	-	1410	1226	1.91014	class_code "o"	Sense-lncRNA	-
MSTRG.25077	Chr10(NC_026002.1)	1729741	1744526	-	14786	257	0.244034	class_code "u"	lincRNA	-
MSTRG.25204	Chr10(NC_026002.1)	5571290	5573268	+	1979	1571	0.271943	class_code "u"	lincRNA	-
MSTRG.25525	Chr10(NC_026002.1)	12691581	12701825	-	10245	291	0.393833	class_code "u"	lincRNA	-
MSTRG.25577	Chr10(NC_026002.1)	13459248	13464547	+	5300	5266	0.921733	class_code "x"	NAT-lncRNA	III
MSTRG.25607	Chr10(NC_026002.1)	13934745	13935960	-	1216	1179	1.22384	class_code "x"	NAT-lncRNA	III
MSTRG.25638	Chr10(NC_026002.1)	14642609	14642935	+	327	222	0.159605	class_code "x"	NAT-lncRNA	III
MSTRG.25662	Chr10(NC_026002.1)	15027040	15027345	+	306	285	0.166656	class_code "x"	NAT-lncRNA	III
MSTRG.25721	Chr10(NC_026002.1)	16031152	16031676	+	525	503	0.770149	class_code "x"	NAT-lncRNA	II
MSTRG.25748	Chr10(NC_026002.1)	16251561	16252070	-	510	218	1.61992	class_code "u"	lincRNA	-
MSTRG.25805	Chr10(NC_026002.1)	16894615	16900594	-	5980	950	1.37111	class_code "x"	NAT-lncRNA	II
MSTRG.25818	Chr10(NC_026002.1)	17036126	17037167	-	1042	975	1.10402	class_code "x"	NAT-lncRNA	III
MSTRG.25824	Chr10(NC_026002.1)	17090954	17092252	-	1299	1193	3.29335	class_code "u"	lincRNA	-
MSTRG.25843	Chr10(NC_026002.1)	17271073	17275981	-	4909	246	0.261047	class_code "u"	lincRNA	-
MSTRG.25883	Chr10(NC_026002.1)	17758408	17763317	-	4910	969	1.0018	class_code "o"	Sense-lncRNA	-
MSTRG.25944	Chr10(NC_026002.1)	18708298	18713398	+	5101	988	0.692734	class_code "x"	NAT-lncRNA	II
MSTRG.25956	Chr10(NC_026002.1)	18896817	18897654	-	838	453	0.210985	class_code "u"	lincRNA	-
MSTRG.26099	Chr10(NC_026002.1)	20547883	20548230	-	348	304	0.527929	class_code "x"	NAT-lncRNA	VI
MSTRG.26191	Chr10(NC_026002.1)	21647134	21648453	+	1320	221	0.21368	class_code "x"	NAT-lncRNA	III
MSTRG.26311	Chr10(NC_026002.1)	23072720	23074050	+	1331	908	1.35203	class_code "x"	NAT-lncRNA	III
MSTRG.26385	Chr10(NC_026002.1)	23963485	23963933	-	449	296	0.260958	class_code "u"	lincRNA	-
MSTRG.26418	Chr10(NC_026002.1)	24665938	24669185	+	3248	1529	0.43928	class_code "u"	lincRNA	-
MSTRG.26426	Chr10(NC_026002.1)	24779954	24782863	-	2910	2760	0.443578	class_code "u"	lincRNA	-
MSTRG.26535	Chr10(NC_026002.1)	26163475	26163971	-	497	353	0.436881	class_code "x"	NAT-lncRNA	III
MSTRG.26541	Chr10(NC_026002.1)	26268870	26272451	+	3582	1342	0.377632	class_code "x"	NAT-lncRNA	III
MSTRG.26666	Chr10(NC_026002.1)	28423935	28433942	-	10008	248	0.492141	class_code "x"	NAT-lncRNA	II
MSTRG.26667	Chr10(NC_026002.1)	28436160	28437783	+	1624	1512	0.867844	class_code "x"	NAT-lncRNA	II
MSTRG.26690	Chr10(NC_026002.1)	28788147	28789831	-	1685	922	0.196782	class_code "x"	NAT-lncRNA	III
MSTRG.26734	Chr10(NC_026002.1)	29506939	29516308	+	9370	9178	1.30727	class_code "x"	NAT-lncRNA	III
MSTRG.26845	Chr10(NC_026002.1)	31139284	31143726	-	4443	212	0.31682	class_code "x"	NAT-lncRNA	III
MSTRG.26849	Chr10(NC_026002.1)	31228507	31230438	-	1932	863	0.210876	class_code "u"	lincRNA	-
MSTRG.26863	Chr10(NC_026002.1)	31483063	31499116	-	16054	870	0.306675	class_code "x"	NAT-lncRNA	II
MSTRG.26905	Chr11(NC_026003.1)	1595267	1598780	+	3514	1882	0.995827	class_code "u"	lincRNA	-
MSTRG.26928	Chr11(NC_026003.1)	2601204	3041453	-	440250	293	2.21356	class_code "x"	NAT-lncRNA	II
MSTRG.26930	Chr11(NC_026003.1)	2696970	2697286	+	317	222	0.144876	class_code "u"	lincRNA	-
MSTRG.26945	Chr11(NC_026003.1)	3188733	3199524	-	10792	811	2.92939	class_code "u"	lincRNA	-
MSTRG.26953	Chr11(NC_026003.1)	3415221	3417715	+	2495	554	33.4777	class_code "u"	lincRNA	-
MSTRG.27003	Chr11(NC_026003.1)	5934676	5956668	-	21993	1277	1.44473	class_code "u"	lincRNA	-
MSTRG.27009	Chr11(NC_026003.1)	6229401	6230667	+	1267	1152	0.371785	class_code "x"	NAT-lncRNA	III
MSTRG.27010	Chr11(NC_026003.1)	6233302	6233787	+	486	432	0.421263	class_code "x"	NAT-lncRNA	III
MSTRG.27077	Chr11(NC_026003.1)	8019653	8020059	-	407	299	0.288996	class_code "u"	lincRNA	-
MSTRG.27078	Chr11(NC_026003.1)	8050098	8058285	-	8188	443	0.685108	class_code "u"	lincRNA	-
MSTRG.27121	Chr11(NC_026003.1)	9159797	9160313	+	517	365	1.75283	class_code "u"	lincRNA	-
MSTRG.27171	Chr11(NC_026003.1)	10207363	10209793	-	2431	2333	0.522484	class_code "u"	lincRNA	-
MSTRG.27225	Chr11(NC_026003.1)	11681261	11684262	+	3002	778	0.486364	class_code "x"	NAT-lncRNA	III
MSTRG.27368	Chr11(NC_026003.1)	15674576	15676235	-	1660	1574	0.620601	class_code "u"	lincRNA	-
MSTRG.27414	Chr11(NC_026003.1)	16783428	16791982	-	8555	903	0.274194	class_code "x"	NAT-lncRNA	III
MSTRG.27426	Chr11(NC_026003.1)	17207548	17210383	-	2836	798	10.2552	class_code "u"	lincRNA	-
MSTRG.27472	Chr11(NC_026003.1)	17871264	17873989	-	2726	2084	3.13982	class_code "x"	NAT-lncRNA	VI
MSTRG.27484	Chr11(NC_026003.1)	18014573	18015756	+	1184	1126	0.156813	class_code "x"	NAT-lncRNA	III
MSTRG.27495	Chr11(NC_026003.1)	18227444	18228512	+	1069	1015	0.349351	class_code "x"	NAT-lncRNA	III
MSTRG.27644	Chr11(NC_026003.1)	20520472	20529014	-	8543	4209	1.02778	class_code "u"	lincRNA	-
MSTRG.27690	Chr11(NC_026003.1)	21176163	21176646	+	484	346	0.31108	class_code "u"	lincRNA	-
MSTRG.27710	Chr11(NC_026003.1)	21481956	21491343	-	9388	208	0.154627	class_code "u"	lincRNA	-
MSTRG.27711	Chr11(NC_026003.1)	21484571	21485400	-	830	727	0.260647	class_code "u"	lincRNA	-
MSTRG.27712	Chr11(NC_026003.1)	21488541	21488965	-	425	346	0.510478	class_code "u"	lincRNA	-
MSTRG.27721	Chr11(NC_026003.1)	21615818	21617537	-	1720	1628	0.473478	class_code "x"	NAT-lncRNA	III
MSTRG.27795	Chr11(NC_026003.1)	22741810	22756783	+	14974	289	0.876584	class_code "x"	NAT-lncRNA	I
MSTRG.27859	Chr11(NC_026003.1)	23575939	23576226	-	288	224	0.443191	class_code "u"	lincRNA	-
MSTRG.27906	Chr11(NC_026003.1)	24094122	24098581	+	4460	1897	4.21204	class_code "x"	NAT-lncRNA	II
MSTRG.27918	Chr11(NC_026003.1)	24191398	24197911	-	6514	932	0.431593	class_code "u"	lincRNA	-
MSTRG.27928	Chr11(NC_026003.1)	24320265	24320833	-	569	533	0.568022	class_code "x"	NAT-lncRNA	III
MSTRG.28205	Chr11(NC_026003.1)	27989088	27991676	-	2589	2219	1.76074	class_code "u"	lincRNA	-
MSTRG.28241	Chr11(NC_026003.1)	28469275	28471122	-	1848	1820	0.832218	class_code "x"	NAT-lncRNA	VI
MSTRG.28259	Chr11(NC_026003.1)	28728659	28731220	-	2562	923	1.25698	class_code "o"	Sense-lncRNA	-
MSTRG.28271	Chr11(NC_026003.1)	28835154	28924760	+	89607	4810	3.08796	class_code "x"	NAT-lncRNA	I
MSTRG.28301	Chr11(NC_026003.1)	29231187	29231469	-	283	229	0.175559	class_code "x"	NAT-lncRNA	III
MSTRG.28405	Chr12(NC_026004.1)	2947825	2956377	-	8553	455	0.147146	class_code "x"	NAT-lncRNA	III
MSTRG.28407	Chr12(NC_026004.1)	2962678	2968346	-	5669	379	1.91688	class_code "x"	NAT-lncRNA	II
MSTRG.28431	Chr12(NC_026004.1)	3748081	3751438	-	3358	3280	0.354179	class_code "u"	lincRNA	-
MSTRG.28440	Chr12(NC_026004.1)	3894858	3895641	-	784	748	0.298334	class_code "x"	NAT-lncRNA	III
MSTRG.28507	Chr12(NC_026004.1)	5732719	5733182	-	464	339	1.3692	class_code "u"	lincRNA	-
MSTRG.28558	Chr12(NC_026004.1)	7186625	7203090	+	16466	4072	1.00789	class_code "x"	NAT-lncRNA	III
MSTRG.28567	Chr12(NC_026004.1)	7664143	7675645	+	11503	718	0.419948	class_code "x"	NAT-lncRNA	II
MSTRG.28593	Chr12(NC_026004.1)	8420935	8449369	+	28435	1014	5.846	class_code "x"	NAT-lncRNA	III
MSTRG.28624	Chr12(NC_026004.1)	9084595	9150160	+	65566	282	2.04471	class_code "x"	NAT-lncRNA	I
MSTRG.28692	Chr12(NC_026004.1)	10749306	10755668	-	6363	5411	9.03258	class_code "u"	lincRNA	-
MSTRG.28732	Chr12(NC_026004.1)	11526571	11529316	+	2746	264	0.229442	class_code "x"	NAT-lncRNA	I
MSTRG.28782	Chr12(NC_026004.1)	12393610	12402936	-	9327	1083	1.89736	class_code "u"	lincRNA	-
MSTRG.28862	Chr12(NC_026004.1)	13716079	13717868	+	1790	300	0.362542	class_code "x"	NAT-lncRNA	I
MSTRG.28916	Chr12(NC_026004.1)	14487459	14488106	-	648	437	0.326286	class_code "x"	NAT-lncRNA	III
MSTRG.28917	Chr12(NC_026004.1)	14517412	14521637	-	4226	1551	2.76479	class_code "o"	Sense-lncRNA	-
MSTRG.28925	Chr12(NC_026004.1)	14607343	14608994	+	1652	1590	0.508632	class_code "x"	NAT-lncRNA	III
MSTRG.28928	Chr12(NC_026004.1)	14636592	14641902	+	5311	746	1.15227	class_code "u"	lincRNA	-
MSTRG.28929	Chr12(NC_026004.1)	14641272	14644908	-	3637	3573	3.11079	class_code "u"	lincRNA	-
MSTRG.28990	Chr12(NC_026004.1)	15650114	15650887	+	774	732	0.501549	class_code "i"	Intronic-lncRNA	-
MSTRG.28993	Chr12(NC_026004.1)	15673018	15683439	-	10422	450	0.430977	class_code "x"	NAT-lncRNA	VI
MSTRG.29003	Chr12(NC_026004.1)	15746315	15746777	-	463	362	0.659243	class_code "x"	NAT-lncRNA	VI
MSTRG.29342	Chr12(NC_026004.1)	20644460	20644822	-	363	291	0.403043	class_code "x"	NAT-lncRNA	III
MSTRG.29343	Chr12(NC_026004.1)	20682899	20683290	-	392	318	0.35382	class_code "x"	NAT-lncRNA	III
MSTRG.29391	Chr12(NC_026004.1)	21309870	21311832	+	1963	990	0.323844	class_code "u"	lincRNA	-
MSTRG.29406	Chr12(NC_026004.1)	21447207	21556194	-	108988	1289	0.636636	class_code "x"	NAT-lncRNA	II
MSTRG.29407	Chr12(NC_026004.1)	21463068	21467298	+	4231	222	0.689802	class_code "x"	NAT-lncRNA	III
MSTRG.29413	Chr12(NC_026004.1)	21582892	21587900	+	5009	530	0.27601	class_code "x"	NAT-lncRNA	VI
MSTRG.29426	Chr12(NC_026004.1)	21863482	21865425	-	1944	1861	1.56363	class_code "u"	lincRNA	-
MSTRG.29432	Chr12(NC_026004.1)	21945550	21955069	+	9520	263	1.61382	class_code "x"	NAT-lncRNA	III
MSTRG.29443	Chr12(NC_026004.1)	22083527	22084620	+	1094	1022	0.619751	class_code "x"	NAT-lncRNA	VI
MSTRG.29517	Chr12(NC_026004.1)	22753807	22756287	+	2481	1758	0.346542	class_code "u"	lincRNA	-
MSTRG.29526	Chr12(NC_026004.1)	22869689	22873398	+	3710	235	0.580064	class_code "u"	lincRNA	-
MSTRG.29594	Chr12(NC_026004.1)	23585072	23585397	+	326	212	0.570235	class_code "x"	NAT-lncRNA	III
MSTRG.29609	Chr12(NC_026004.1)	23793699	23795258	+	1560	803	1.00989	class_code "u"	lincRNA	-
MSTRG.29634	Chr12(NC_026004.1)	24018045	24047845	+	29801	391	0.18632	class_code "x"	NAT-lncRNA	I
MSTRG.29653	Chr12(NC_026004.1)	24179757	24183119	-	3363	932	0.246625	class_code "x"	NAT-lncRNA	VI
MSTRG.29662	Chr12(NC_026004.1)	24270181	24270506	+	326	288	0.21257	class_code "x"	NAT-lncRNA	III
MSTRG.29731	Chr12(NC_026004.1)	24943372	24944016	-	645	351	0.185792	class_code "o"	Sense-lncRNA	-
MSTRG.29800	Chr12(NC_026004.1)	25778931	25779439	+	509	408	0.165232	class_code "u"	lincRNA	-
MSTRG.29869	Chr12(NC_026004.1)	26751998	26752936	+	939	843	2.71063	class_code "x"	NAT-lncRNA	VI
MSTRG.29910	Chr12(NC_026004.1)	27172958	27173548	+	591	418	0.243227	class_code "x"	NAT-lncRNA	VI
MSTRG.30011	Chr12(NC_026004.1)	28502352	28503291	+	940	879	1.00559	class_code "x"	NAT-lncRNA	III
MSTRG.30016	Chr12(NC_026004.1)	28565372	28566702	+	1331	1249	0.140855	class_code "u"	lincRNA	-
MSTRG.30025	Chr12(NC_026004.1)	28594510	28595117	-	608	513	0.34997	class_code "x"	NAT-lncRNA	III
MSTRG.30111	Chr13(NC_026005.1)	1563336	1563993	+	658	448	0.318872	class_code "x"	NAT-lncRNA	V
MSTRG.30150	Chr13(NC_026005.1)	2446972	2455622	-	8651	490	0.229403	class_code "u"	lincRNA	-
MSTRG.30152	Chr13(NC_026005.1)	2522523	2524089	-	1567	604	0.220984	class_code "u"	lincRNA	-
MSTRG.30160	Chr13(NC_026005.1)	2681245	2683492	+	2248	2208	1.17756	class_code "x"	NAT-lncRNA	VI
MSTRG.30188	Chr13(NC_026005.1)	3125303	3129970	+	4668	3207	1.28617	class_code "x"	NAT-lncRNA	I
MSTRG.30272	Chr13(NC_026005.1)	4242857	4245051	+	2195	2043	0.839088	class_code "x"	NAT-lncRNA	V
MSTRG.30363	Chr13(NC_026005.1)	6102983	6108175	+	5193	499	0.261115	class_code "u"	lincRNA	-
MSTRG.30454	Chr13(NC_026005.1)	7718196	7718567	-	372	212	0.303419	class_code "u"	lincRNA	-
MSTRG.30482	Chr13(NC_026005.1)	8217442	8222560	-	5119	5088	0.827921	class_code "u"	lincRNA	-
MSTRG.30524	Chr13(NC_026005.1)	10168779	10221943	-	53165	394	0.65318	class_code "u"	lincRNA	-
MSTRG.30535	Chr13(NC_026005.1)	10735318	10736125	+	808	719	1.08211	class_code "u"	lincRNA	-
MSTRG.30577	Chr13(NC_026005.1)	11516180	11522767	+	6588	3355	12.5042	class_code "u"	lincRNA	-
MSTRG.30580	Chr13(NC_026005.1)	11860912	11861611	+	700	611	0.18371	class_code "u"	lincRNA	-
MSTRG.30600	Chr13(NC_026005.1)	12557270	12561314	-	4045	3095	1.04004	class_code "x"	NAT-lncRNA	V
MSTRG.30615	Chr13(NC_026005.1)	13093164	13111315	-	18152	854	6.04033	class_code "u"	lincRNA	-
MSTRG.30650	Chr13(NC_026005.1)	13983099	13983362	+	264	231	0.515462	class_code "x"	NAT-lncRNA	III
MSTRG.30653	Chr13(NC_026005.1)	14049246	14052538	-	3293	531	0.272462	class_code "u"	lincRNA	-
MSTRG.30654	Chr13(NC_026005.1)	14053573	14054999	-	1427	1355	0.272086	class_code "u"	lincRNA	-
MSTRG.30775	Chr13(NC_026005.1)	16860695	16866804	+	6110	627	0.3807	class_code "x"	NAT-lncRNA	IV
MSTRG.30784	Chr13(NC_026005.1)	16942673	16944530	-	1858	1773	1.02471	class_code "x"	NAT-lncRNA	V
MSTRG.30788	Chr13(NC_026005.1)	16963491	16972062	-	8572	1326	4.7171	class_code "x"	NAT-lncRNA	V
MSTRG.30799	Chr13(NC_026005.1)	17114112	17125442	-	11331	1537	8.54381	class_code "u"	lincRNA	-
MSTRG.30835	Chr13(NC_026005.1)	17945063	17950037	+	4975	2499	2.93668	class_code "x"	NAT-lncRNA	III
MSTRG.30878	Chr13(NC_026005.1)	18785833	18790068	+	4236	1173	4.83072	class_code "x"	NAT-lncRNA	VI
MSTRG.30979	Chr13(NC_026005.1)	20465997	20466435	-	439	259	0.209698	class_code "u"	lincRNA	-
MSTRG.31051	Chr13(NC_026005.1)	21336620	21336921	-	302	205	0.15689	class_code "u"	lincRNA	-
MSTRG.31214	Chr13(NC_026005.1)	23320731	23331220	+	10490	384	0.833096	class_code "u"	lincRNA	-
MSTRG.31229	Chr13(NC_026005.1)	23456136	23461902	-	5767	2691	0.471401	class_code "u"	lincRNA	-
MSTRG.31291	Chr13(NC_026005.1)	24325094	24338082	+	12989	228	0.331499	class_code "x"	NAT-lncRNA	III
MSTRG.31323	Chr13(NC_026005.1)	24901209	24901666	-	458	370	0.513877	class_code "u"	lincRNA	-
MSTRG.31360	Chr13(NC_026005.1)	25482803	25485389	+	2587	540	1.44114	class_code "x"	NAT-lncRNA	II
MSTRG.31501	Chr13(NC_026005.1)	27522514	27523330	-	817	712	0.14815	class_code "u"	lincRNA	-
MSTRG.31597	Chr14(NC_026006.1)	1045470	1047338	+	1869	327	5.90088	class_code "u"	lincRNA	-
MSTRG.31612	Chr14(NC_026006.1)	1218456	1220470	+	2015	1197	0.196682	class_code "x"	NAT-lncRNA	II
MSTRG.31629	Chr14(NC_026006.1)	1408410	1409372	-	963	935	0.870055	class_code "u"	lincRNA	-
MSTRG.31778	Chr14(NC_026006.1)	2911913	2921589	-	9677	317	0.149144	class_code "u"	lincRNA	-
MSTRG.31795	Chr14(NC_026006.1)	3051531	3052054	-	524	229	1.05148	class_code "x"	NAT-lncRNA	III
MSTRG.31835	Chr14(NC_026006.1)	3421303	3421531	+	229	208	0.193533	class_code "x"	NAT-lncRNA	III
MSTRG.31857	Chr14(NC_026006.1)	3581618	3582236	+	619	448	0.50529	class_code "x"	NAT-lncRNA	III
MSTRG.31864	Chr14(NC_026006.1)	3646478	3649055	-	2578	2411	1.14605	class_code "u"	lincRNA	-
MSTRG.31908	Chr14(NC_026006.1)	4088212	4097970	-	9759	4651	1.48403	class_code "u"	lincRNA	-
MSTRG.31920	Chr14(NC_026006.1)	4203974	4211679	-	7706	1183	0.48144	class_code "u"	lincRNA	-
MSTRG.32027	Chr14(NC_026006.1)	5559385	5559696	-	312	224	0.98753	class_code "x"	NAT-lncRNA	III
MSTRG.32080	Chr14(NC_026006.1)	6074141	6074461	+	321	229	1.246	class_code "x"	NAT-lncRNA	III
MSTRG.32081	Chr14(NC_026006.1)	6075372	6075696	+	325	280	0.81593	class_code "x"	NAT-lncRNA	III
MSTRG.32111	Chr14(NC_026006.1)	6436223	6437601	-	1379	1264	0.595879	class_code "x"	NAT-lncRNA	VI
MSTRG.32195	Chr14(NC_026006.1)	7549594	7550926	+	1333	334	4.08453	class_code "u"	lincRNA	-
MSTRG.32222	Chr14(NC_026006.1)	7926456	7933586	+	7131	242	0.759649	class_code "u"	lincRNA	-
MSTRG.32227	Chr14(NC_026006.1)	7954249	7956898	+	2650	372	0.25534	class_code "u"	lincRNA	-
MSTRG.32229	Chr14(NC_026006.1)	7957898	7959144	-	1247	1107	1.54972	class_code "x"	NAT-lncRNA	VI
MSTRG.32331	Chr14(NC_026006.1)	9583252	9583793	+	542	322	0.406228	class_code "x"	NAT-lncRNA	III
MSTRG.32396	Chr14(NC_026006.1)	10826596	10830096	+	3501	2150	1.04104	class_code "u"	lincRNA	-
MSTRG.32402	Chr14(NC_026006.1)	10890553	10891878	+	1326	302	1.31685	class_code "u"	lincRNA	-
MSTRG.32418	Chr14(NC_026006.1)	11104899	11105726	-	828	807	0.563075	class_code "x"	NAT-lncRNA	VI
MSTRG.32440	Chr14(NC_026006.1)	11379326	11403006	+	23681	347	14736.8	class_code "u"	lincRNA	-
MSTRG.32442	Chr14(NC_026006.1)	11403137	11403701	+	565	420	0.155196	class_code "u"	lincRNA	-
MSTRG.32489	Chr14(NC_026006.1)	12091706	12092930	-	1225	349	0.180319	class_code "u"	lincRNA	-
MSTRG.32491	Chr14(NC_026006.1)	12093149	12097965	-	4817	2127	0.758732	class_code "u"	lincRNA	-
MSTRG.32507	Chr14(NC_026006.1)	12249428	12249763	+	336	264	0.182781	class_code "u"	lincRNA	-
MSTRG.32602	Chr14(NC_026006.1)	14369898	14381473	+	11576	248	0.237111	class_code "u"	lincRNA	-
MSTRG.32652	Chr14(NC_026006.1)	15843027	15856006	-	12980	224	0.53604	class_code "u"	lincRNA	-
MSTRG.32780	Chr14(NC_026006.1)	19577737	19580004	-	2268	441	0.145861	class_code "u"	lincRNA	-
MSTRG.32789	Chr14(NC_026006.1)	19959485	19960187	+	703	409	0.157273	class_code "x"	NAT-lncRNA	III
MSTRG.32802	Chr14(NC_026006.1)	20348246	20348548	+	303	227	0.194108	class_code "u"	lincRNA	-
MSTRG.32804	Chr14(NC_026006.1)	20368049	20368632	-	584	485	0.346492	class_code "u"	lincRNA	-
MSTRG.32823	Chr14(NC_026006.1)	20976359	21000161	+	23803	424	0.780873	class_code "u"	lincRNA	-
MSTRG.32834	Chr14(NC_026006.1)	21326862	21327153	-	292	221	0.144561	class_code "u"	lincRNA	-
MSTRG.32843	Chr14(NC_026006.1)	21569800	21592236	-	22437	1404	1.38856	class_code "x"	NAT-lncRNA	VI
MSTRG.32896	Chr14(NC_026006.1)	23003810	23009918	-	6109	588	0.3879	class_code "u"	lincRNA	-
MSTRG.32915	Chr14(NC_026006.1)	23435847	23438948	-	3102	1127	0.849975	class_code "o"	Sense-lncRNA	-
MSTRG.33060	Chr15(NC_026007.1)	5041135	5042237	+	1103	741	1.46769	class_code "x"	NAT-lncRNA	III
MSTRG.33086	Chr15(NC_026007.1)	5412680	5413702	+	1023	907	0.301648	class_code "u"	lincRNA	-
MSTRG.33108	Chr15(NC_026007.1)	6119427	6124852	+	5426	553	0.307084	class_code "x"	NAT-lncRNA	III
MSTRG.33172	Chr15(NC_026007.1)	7978700	7981678	-	2979	2788	0.358681	class_code "o"	Sense-lncRNA	-
MSTRG.33176	Chr15(NC_026007.1)	8034480	8045745	-	11266	1810	0.294112	class_code "u"	lincRNA	-
MSTRG.33179	Chr15(NC_026007.1)	8139159	8139849	-	691	474	47.4179	class_code "x"	NAT-lncRNA	VI
MSTRG.33228	Chr15(NC_026007.1)	9344283	9347536	-	3254	2799	0.583225	class_code "x"	NAT-lncRNA	V
MSTRG.33243	Chr15(NC_026007.1)	9723898	9738764	-	14867	500	0.463568	class_code "x"	NAT-lncRNA	I
MSTRG.33273	Chr15(NC_026007.1)	10175717	10178410	+	2694	1190	0.437526	class_code "u"	lincRNA	-
MSTRG.33284	Chr15(NC_026007.1)	10312520	10316122	+	3603	3523	0.559107	class_code "x"	NAT-lncRNA	III
MSTRG.33330	Chr15(NC_026007.1)	11092162	11093650	-	1489	667	0.205415	class_code "u"	lincRNA	-
MSTRG.33333	Chr15(NC_026007.1)	11138084	11139546	-	1463	1184	0.236465	class_code "u"	lincRNA	-
MSTRG.33465	Chr15(NC_026007.1)	13239018	13247763	+	8746	405	0.410303	class_code "x"	NAT-lncRNA	III
MSTRG.33657	Chr15(NC_026007.1)	16057036	16060318	+	3283	657	1.56774	class_code "u"	lincRNA	-
MSTRG.33718	Chr15(NC_026007.1)	16948574	16950443	+	1870	1846	0.670922	class_code "i"	Intronic-lncRNA	-
MSTRG.33795	Chr15(NC_026007.1)	18049026	18056498	-	7473	937	1.31515	class_code "u"	lincRNA	-
MSTRG.33801	Chr15(NC_026007.1)	18128202	18128966	+	765	593	0.240272	class_code "u"	lincRNA	-
MSTRG.33847	Chr15(NC_026007.1)	18792806	18794426	+	1621	1527	1.76971	class_code "x"	NAT-lncRNA	II
MSTRG.33901	Chr15(NC_026007.1)	19434480	19437803	-	3324	998	0.580998	class_code "x"	NAT-lncRNA	II
MSTRG.33984	Chr15(NC_026007.1)	20355655	20356675	+	1021	989	1.90124	class_code "x"	NAT-lncRNA	VI
MSTRG.34004	Chr15(NC_026007.1)	20571214	20573507	+	2294	374	0.940242	class_code "x"	NAT-lncRNA	II
MSTRG.34011	Chr15(NC_026007.1)	20629932	20636712	-	6781	754	1.26353	class_code "u"	lincRNA	-
MSTRG.34031	Chr15(NC_026007.1)	21024453	21027006	+	2554	2470	0.708317	class_code "u"	lincRNA	-
MSTRG.34038	Chr15(NC_026007.1)	21078567	21083861	-	5295	348	0.231052	class_code "x"	NAT-lncRNA	I
MSTRG.34105	Chr15(NC_026007.1)	21975969	21979578	+	3610	3555	0.551013	class_code "x"	NAT-lncRNA	III
MSTRG.34104	Chr15(NC_026007.1)	22008663	22012163	-	3501	2906	0.399238	class_code "i"	Intronic-lncRNA	-
MSTRG.34109	Chr15(NC_026007.1)	22047184	22049004	-	1821	1455	26.0377	class_code "u"	lincRNA	-
MSTRG.34112	Chr15(NC_026007.1)	22085055	22085765	-	711	684	0.257911	class_code "x"	NAT-lncRNA	VI
MSTRG.34163	Chr15(NC_026007.1)	22654223	22654476	+	254	203	0.159877	class_code "x"	NAT-lncRNA	III
MSTRG.34288	Chr15(NC_026007.1)	23987014	23987432	-	419	270	0.405306	class_code "x"	NAT-lncRNA	VI
MSTRG.34338	Chr16(NC_026008.1)	664759	665554	+	796	731	0.865878	class_code "x"	NAT-lncRNA	III
MSTRG.34364	Chr16(NC_026008.1)	1021949	1022671	+	723	239	0.135468	class_code "u"	lincRNA	-
MSTRG.34504	Chr16(NC_026008.1)	2559246	2593634	+	34389	616	0.782102	class_code "u"	lincRNA	-
MSTRG.34562	Chr16(NC_026008.1)	3177276	3177828	-	553	528	0.761117	class_code "x"	NAT-lncRNA	VI
MSTRG.34587	Chr16(NC_026008.1)	3366308	3368618	-	2311	1961	0.351395	class_code "x"	NAT-lncRNA	III
MSTRG.34658	Chr16(NC_026008.1)	4106789	4114932	+	8144	767	0.910011	class_code "u"	lincRNA	-
MSTRG.34710	Chr16(NC_026008.1)	4767313	4769503	-	2191	1932	2.1683	class_code "x"	NAT-lncRNA	VI
MSTRG.34719	Chr16(NC_026008.1)	4891099	4894619	-	3521	3147	1.04656	class_code "x"	NAT-lncRNA	VI
MSTRG.34798	Chr16(NC_026008.1)	5939181	5939770	+	590	361	0.181897	class_code "u"	lincRNA	-
MSTRG.34860	Chr16(NC_026008.1)	7722020	7723137	+	1118	1029	1.30447	class_code "x"	NAT-lncRNA	III
MSTRG.34907	Chr16(NC_026008.1)	9227316	9228974	-	1659	1439	0.732636	class_code "x"	NAT-lncRNA	II
MSTRG.34917	Chr16(NC_026008.1)	9825585	9825856	+	272	215	0.593727	class_code "x"	NAT-lncRNA	III
MSTRG.34979	Chr16(NC_026008.1)	11095853	11097751	+	1899	1214	0.408212	class_code "x"	NAT-lncRNA	III
MSTRG.34996	Chr16(NC_026008.1)	11455271	11465774	+	10504	1972	0.716234	class_code "x"	NAT-lncRNA	III
MSTRG.35008	Chr16(NC_026008.1)	11962271	11962896	+	626	471	0.294699	class_code "u"	lincRNA	-
MSTRG.35019	Chr16(NC_026008.1)	12105945	12106378	-	434	207	0.392837	class_code "u"	lincRNA	-
MSTRG.35028	Chr16(NC_026008.1)	12397652	12400453	+	2802	206	0.156128	class_code "x"	NAT-lncRNA	VI
MSTRG.35117	Chr16(NC_026008.1)	14679282	14679836	+	555	489	1.58916	class_code "x"	NAT-lncRNA	III
MSTRG.35120	Chr16(NC_026008.1)	14745299	14750767	+	5469	5405	0.97726	class_code "x"	NAT-lncRNA	III
MSTRG.35131	Chr16(NC_026008.1)	14931940	14932432	-	493	265	0.636978	class_code "u"	lincRNA	-
MSTRG.35147	Chr16(NC_026008.1)	15184621	15184904	+	284	210	1.32462	class_code "x"	NAT-lncRNA	III
MSTRG.35281	Chr16(NC_026008.1)	17512988	17513376	+	389	240	0.308155	class_code "x"	NAT-lncRNA	III
MSTRG.35285	Chr16(NC_026008.1)	17577287	17590589	+	13303	371	1.55251	class_code "x"	NAT-lncRNA	I
MSTRG.35307	Chr16(NC_026008.1)	17813357	17816153	-	2797	634	0.224224	class_code "x"	NAT-lncRNA	VI
MSTRG.35315	Chr16(NC_026008.1)	17934490	17938326	+	3837	3775	1.53647	class_code "x"	NAT-lncRNA	II
MSTRG.35318	Chr16(NC_026008.1)	17966341	17967823	+	1483	1362	0.434303	class_code "u"	lincRNA	-
MSTRG.35335	Chr16(NC_026008.1)	18143055	18148196	+	5142	238	0.243921	class_code "u"	lincRNA	-
MSTRG.35365	Chr16(NC_026008.1)	18685850	18701089	-	15240	269	0.179344	class_code "u"	lincRNA	-
MSTRG.35374	Chr16(NC_026008.1)	18751988	18755221	+	3234	3213	0.448235	class_code "i"	Intronic-lncRNA	-
MSTRG.35465	Chr16(NC_026008.1)	19654148	19655296	-	1149	1119	1.1356	class_code "u"	lincRNA	-
MSTRG.35480	Chr16(NC_026008.1)	19842521	19842783	-	263	242	0.509682	class_code "x"	NAT-lncRNA	III
MSTRG.35502	Chr16(NC_026008.1)	20218300	20221243	+	2944	1574	6.25894	class_code "u"	lincRNA	-
MSTRG.35578	Chr16(NC_026008.1)	21260803	21261936	+	1134	936	0.347224	class_code "x"	NAT-lncRNA	III
MSTRG.35597	NW_011550905.1	204286	204735	+	450	328	0.146594	class_code "u"	lincRNA	-
MSTRG.35687	NW_011550905.1	1626381	1628536	+	2156	2035	3.31268	class_code "i"	Intronic-lncRNA	-
MSTRG.35713	NW_011550905.1	1994538	1998478	-	3941	3249	0.282968	class_code "u"	lincRNA	-
MSTRG.35773	NW_011550905.1	3265920	3266629	-	710	582	0.155399	class_code "u"	lincRNA	-
MSTRG.35835	NW_011550905.1	4060340	4061040	+	701	407	0.413291	class_code "x"	NAT-lncRNA	VI
MSTRG.35854	NW_011550905.1	4402958	4405742	+	2785	283	0.173124	class_code "u"	lincRNA	-
MSTRG.35861	NW_011550905.1	4412861	4413308	+	448	326	0.246644	class_code "u"	lincRNA	-
MSTRG.35915	NW_011550905.1	5435939	5495393	-	59455	2108	0.354961	class_code "x"	NAT-lncRNA	II
MSTRG.35920	NW_011550905.1	5554467	5554989	+	523	280	0.329212	class_code "x"	NAT-lncRNA	III
MSTRG.35955	NW_011550905.1	5957946	5958436	-	491	446	0.335085	class_code "u"	lincRNA	-
MSTRG.35956	NW_011550905.1	5958671	5970457	+	11787	313	0.687262	class_code "u"	lincRNA	-
MSTRG.35979	NW_011550905.1	6337109	6339466	-	2358	2233	0.350815	class_code "x"	NAT-lncRNA	III
MSTRG.36033	NW_011550906.1	977388	1022567	+	45180	230	1.50161	class_code "x"	NAT-lncRNA	I
MSTRG.36142	NW_011550906.1	3393995	3406630	+	12636	883	1.19525	class_code "u"	lincRNA	-
MSTRG.36240	NW_011550907.1	390589	391710	-	1122	1085	0.406884	class_code "x"	NAT-lncRNA	III
MSTRG.36248	NW_011550907.1	469524	473146	+	3623	289	0.297697	class_code "u"	lincRNA	-
MSTRG.36276	NW_011550907.1	702581	707914	-	5334	1992	0.678716	class_code "x"	NAT-lncRNA	III
MSTRG.36289	NW_011550907.1	865663	872488	+	6826	1272	42.2637	class_code "x"	NAT-lncRNA	III
MSTRG.36312	NW_011550907.1	1150109	1150453	-	345	214	0.150292	class_code "u"	lincRNA	-
MSTRG.36366	NW_011550907.1	1995690	2024295	-	28606	1033	1.6802	class_code "x"	NAT-lncRNA	I
MSTRG.36391	NW_011550907.1	2276076	2276368	-	293	233	2.79563	class_code "x"	NAT-lncRNA	III
MSTRG.36420	NW_011550907.1	2728912	2729806	+	895	260	0.273381	class_code "x"	NAT-lncRNA	III
MSTRG.36438	NW_011550907.1	2950854	2957108	+	6255	1275	0.611633	class_code "i"	Intronic-lncRNA	-
MSTRG.36443	NW_011550907.1	3093278	3096224	+	2947	2461	1.14731	class_code "o"	Sense-lncRNA	-
MSTRG.36456	NW_011550907.1	3448291	3460611	+	12321	240	0.198782	class_code "u"	lincRNA	-
MSTRG.36464	NW_011550907.1	3508557	3515741	-	7185	890	2.75803	class_code "x"	NAT-lncRNA	II
MSTRG.36507	NW_011550908.1	89172	90725	+	1554	1246	0.526212	class_code "u"	lincRNA	-
MSTRG.36586	NW_011550908.1	1901840	1902180	+	341	296	1.03816	class_code "x"	NAT-lncRNA	III
MSTRG.36678	NW_011550909.1	1936528	1937228	+	701	669	0.287411	class_code "u"	lincRNA	-
MSTRG.36684	NW_011550909.1	2070889	2142487	+	71599	675	0.306218	class_code "i"	Intronic-lncRNA	-
MSTRG.36736	NW_011550910.1	199930	200451	-	522	300	0.349032	class_code "o"	Sense-lncRNA	-
MSTRG.36845	NW_011550910.1	1545075	1545595	-	521	447	0.182757	class_code "x"	NAT-lncRNA	III
MSTRG.36890	NW_011550910.1	2384569	2384897	-	329	240	0.407837	class_code "i"	Intronic-lncRNA	-
MSTRG.36944	NW_011550911.1	752433	755548	+	3116	2990	0.342587	class_code "o"	Sense-lncRNA	-
MSTRG.36991	NW_011550911.1	1897027	2011376	-	114350	2001	0.861454	class_code "u"	lincRNA	-
MSTRG.37087	NW_011550912.1	958714	959079	+	366	280	0.654352	class_code "x"	NAT-lncRNA	III
MSTRG.37088	NW_011550912.1	1004780	1009739	-	4960	4882	1.18106	class_code "o"	Sense-lncRNA	-
MSTRG.37104	NW_011550912.1	1587589	1588336	-	748	286	0.294541	class_code "u"	lincRNA	-
MSTRG.37114	NW_011550912.1	1862667	1862987	-	321	240	0.263553	class_code "x"	NAT-lncRNA	III
MSTRG.37145	NW_011550913.1	159084	342454	+	183371	421	0.936521	class_code "x"	NAT-lncRNA	I
MSTRG.37249	NW_011550914.1	547018	547979	+	962	410	0.336947	class_code "x"	NAT-lncRNA	III
MSTRG.37365	NW_011550915.1	313725	314118	-	394	302	0.424928	class_code "u"	lincRNA	-
MSTRG.37370	NW_011550915.1	336400	339159	-	2760	1694	43.6071	class_code "u"	lincRNA	-
MSTRG.37381	NW_011550915.1	513938	686375	+	172438	317	0.682601	class_code "x"	NAT-lncRNA	II
MSTRG.37393	NW_011550915.1	922934	930969	-	8036	211	0.152429	class_code "u"	lincRNA	-
MSTRG.37406	NW_011550915.1	1102941	1105876	-	2936	365	0.352318	class_code "u"	lincRNA	-
MSTRG.37446	NW_011550915.1	1817289	1818492	+	1204	1120	0.495356	class_code "x"	NAT-lncRNA	II
MSTRG.37565	NW_011550917.1	363307	369464	-	6158	1503	1.52297	class_code "x"	NAT-lncRNA	VI
MSTRG.37576	NW_011550917.1	461386	461696	+	311	272	0.832423	class_code "x"	NAT-lncRNA	III
MSTRG.37579	NW_011550917.1	483640	485062	-	1423	1328	0.351858	class_code "x"	NAT-lncRNA	III
MSTRG.37584	NW_011550917.1	572821	574153	+	1333	1292	0.502268	class_code "x"	NAT-lncRNA	III
MSTRG.37615	NW_011550917.1	1316850	1340935	-	24086	2082	1.52617	class_code "u"	lincRNA	-
MSTRG.37634	NW_011550917.1	1688549	1731921	+	43373	1907	0.522016	class_code "u"	lincRNA	-
MSTRG.37682	NW_011550918.1	795486	802627	+	7142	222	0.922135	class_code "u"	lincRNA	-
MSTRG.37721	NW_011550918.1	1788738	1789550	-	813	533	0.72632	class_code "x"	NAT-lncRNA	III
MSTRG.37775	NW_011550919.1	1556909	1557298	-	390	215	0.51784	class_code "x"	NAT-lncRNA	III
MSTRG.37787	NW_011550919.1	1923787	1924958	+	1172	1150	0.194466	class_code "x"	NAT-lncRNA	III
MSTRG.37853	NW_011550920.1	1654076	1657972	+	3897	1783	0.567367	class_code "u"	lincRNA	-
MSTRG.37859	NW_011550920.1	1826100	1827115	+	1016	482	0.483771	class_code "x"	NAT-lncRNA	III
MSTRG.37896	NW_011550921.1	907768	912921	-	5154	1165	0.229182	class_code "x"	NAT-lncRNA	II
MSTRG.37946	NW_011550921.1	1612299	1614947	+	2649	2571	0.835481	class_code "u"	lincRNA	-
MSTRG.37998	NW_011550922.1	896935	899430	+	2496	1027	0.411608	class_code "u"	lincRNA	-
MSTRG.38015	NW_011550922.1	1286494	1289616	-	3123	3027	0.593806	class_code "x"	NAT-lncRNA	III
MSTRG.38069	NW_011550923.1	1138746	1139425	-	680	615	0.385165	class_code "i"	Intronic-lncRNA	-
MSTRG.38102	NW_011550924.1	319831	334109	+	14279	762	2.21468	class_code "u"	lincRNA	-
MSTRG.38163	NW_011550924.1	1876498	1877007	-	510	421	0.190144	class_code "u"	lincRNA	-
MSTRG.38216	NW_011550926.1	89460	104717	+	15258	1947	0.818173	class_code "u"	lincRNA	-
MSTRG.38228	NW_011550926.1	171860	180075	+	8216	424	0.355127	class_code "u"	lincRNA	-
MSTRG.38229	NW_011550926.1	180258	183889	+	3632	370	0.255996	class_code "u"	lincRNA	-
MSTRG.38283	NW_011550927.1	959977	961309	+	1333	237	0.525862	class_code "x"	NAT-lncRNA	I
MSTRG.38339	NW_011550928.1	1004653	1013285	+	8633	2590	0.531984	class_code "x"	NAT-lncRNA	III
MSTRG.38361	NW_011550928.1	1492181	1492767	+	587	228	0.140593	class_code "u"	lincRNA	-
MSTRG.38388	NW_011550929.1	258016	260834	+	2819	2758	2.76434	class_code "u"	lincRNA	-
MSTRG.38436	NW_011550930.1	594028	595777	+	1750	1694	0.489873	class_code "x"	NAT-lncRNA	III
MSTRG.38688	NW_011550936.1	558359	561092	+	2734	710	1.22684	class_code "u"	lincRNA	-
MSTRG.38746	NW_011550938.1	38983	39456	-	474	453	0.40276	class_code "u"	lincRNA	-
MSTRG.38824	NW_011550940.1	718349	721010	+	2662	2624	0.347384	class_code "i"	Intronic-lncRNA	-
MSTRG.38860	NW_011550941.1	482783	483233	-	451	336	0.239304	class_code "u"	lincRNA	-
MSTRG.38923	NW_011550942.1	240265	241996	+	1732	345	0.172931	class_code "u"	lincRNA	-
MSTRG.38935	NW_011550942.1	395185	401966	+	6782	556	0.435919	class_code "u"	lincRNA	-
MSTRG.38976	NW_011550942.1	825395	829873	-	4479	2163	0.415702	class_code "x"	NAT-lncRNA	VI
MSTRG.38982	NW_011550942.1	872438	964889	-	92452	1577	0.752989	class_code "x"	NAT-lncRNA	IV
MSTRG.39026	NW_011550943.1	403155	424575	-	21421	3001	2.79626	class_code "x"	NAT-lncRNA	II
MSTRG.39027	NW_011550943.1	411648	424990	-	13343	290	1.77023	class_code "x"	NAT-lncRNA	II
MSTRG.39068	NW_011550943.1	1041499	1042022	+	524	416	0.412403	class_code "u"	lincRNA	-
MSTRG.39079	NW_011550944.1	371607	378293	+	6687	428	0.719021	class_code "u"	lincRNA	-
MSTRG.39251	NW_011550947.1	558133	558517	+	385	255	0.315108	class_code "x"	NAT-lncRNA	III
MSTRG.39274	NW_011550948.1	528137	547367	-	19231	1381	1.36141	class_code "u"	lincRNA	-
MSTRG.39285	NW_011550948.1	918542	920519	+	1978	1925	0.305724	class_code "i"	Intronic-lncRNA	-
MSTRG.39325	NW_011550949.1	1139691	1149175	-	9485	404	0.222726	class_code "u"	lincRNA	-
MSTRG.39337	NW_011550949.1	1669711	1744442	-	74732	920	0.369912	class_code "u"	lincRNA	-
MSTRG.39394	NW_011550950.1	1073611	1083394	-	9784	2041	9.25368	class_code "x"	NAT-lncRNA	III
MSTRG.39395	NW_011550950.1	1104733	1104970	+	238	205	0.26096	class_code "i"	Intronic-lncRNA	-
MSTRG.39399	NW_011550950.1	1226255	1227933	+	1679	1576	3.76473	class_code "u"	lincRNA	-
MSTRG.39439	NW_011550952.1	874647	875430	-	784	754	0.207876	class_code "x"	NAT-lncRNA	III
MSTRG.39489	NW_011550953.1	810680	828970	-	18291	1273	1.19899	class_code "u"	lincRNA	-
MSTRG.39502	NW_011550953.1	1085236	1088807	+	3572	1698	2.2742	class_code "u"	lincRNA	-
MSTRG.39578	NW_011550955.1	195888	199529	-	3642	633	0.29605	class_code "x"	NAT-lncRNA	IV
MSTRG.39624	NW_011550955.1	705090	720330	-	15241	959	0.430495	class_code "o"	Sense-lncRNA	-
MSTRG.39646	NW_011550956.1	573288	577188	+	3901	251	0.232569	class_code "u"	lincRNA	-
MSTRG.39726	NW_011550958.1	589935	590318	-	384	305	0.195084	class_code "u"	lincRNA	-
MSTRG.39745	NW_011550959.1	245674	255829	+	10156	1344	0.873077	class_code "x"	NAT-lncRNA	II
MSTRG.39758	NW_011550959.1	465668	469565	+	3898	482	0.373449	class_code "u"	lincRNA	-
MSTRG.39781	NW_011550959.1	796225	798089	+	1865	473	0.589645	class_code "u"	lincRNA	-
MSTRG.39980	NW_011550964.1	1107719	1108273	+	555	428	0.158555	class_code "x"	NAT-lncRNA	III
MSTRG.39993	NW_011550965.1	296912	298745	-	1834	1617	0.610577	class_code "o"	Sense-lncRNA	-
MSTRG.40012	NW_011550967.1	158605	164663	+	6059	253	0.398323	class_code "u"	lincRNA	-
MSTRG.40016	NW_011550967.1	443716	450930	+	7215	1228	0.786512	class_code "u"	lincRNA	-
MSTRG.40145	NW_011550970.1	657862	662116	+	4255	4233	0.14868	class_code "x"	NAT-lncRNA	III
MSTRG.40199	NW_011550971.1	869246	872403	+	3158	288	0.550372	class_code "x"	NAT-lncRNA	III
MSTRG.40254	NW_011550973.1	1064494	1067051	-	2558	1850	0.829385	class_code "x"	NAT-lncRNA	III
MSTRG.40308	NW_011550975.1	608342	612988	-	4647	2672	0.985268	class_code "x"	NAT-lncRNA	VI
MSTRG.40337	NW_011550976.1	401486	402641	-	1156	1124	0.517645	class_code "x"	NAT-lncRNA	III
MSTRG.40401	NW_011550978.1	777407	778267	-	861	734	0.38056	class_code "x"	NAT-lncRNA	III
MSTRG.40439	NW_011550980.1	32022	38180	+	6159	841	0.568037	class_code "x"	NAT-lncRNA	III
MSTRG.40538	NW_011550982.1	801718	807269	-	5552	905	0.40748	class_code "x"	NAT-lncRNA	III
MSTRG.40617	NW_011550986.1	16546	18476	+	1931	1486	0.279854	class_code "u"	lincRNA	-
MSTRG.40740	NW_011550989.1	794276	801699	-	7424	7318	0.22046	class_code "u"	lincRNA	-
MSTRG.40766	NW_011550991.1	141183	143941	-	2759	669	0.533757	class_code "x"	NAT-lncRNA	III
MSTRG.40767	NW_011550991.1	187183	189902	+	2720	2685	0.827446	class_code "u"	lincRNA	-
MSTRG.40792	NW_011550991.1	861096	862007	-	912	865	2.3909	class_code "o"	Sense-lncRNA	-
MSTRG.40838	NW_011550992.1	635042	637070	+	2029	2006	0.303415	class_code "x"	NAT-lncRNA	VI
MSTRG.40844	NW_011550992.1	769983	770472	+	490	365	10.9602	class_code "u"	lincRNA	-
MSTRG.40901	NW_011550995.1	673234	678989	+	5756	343	1.30624	class_code "u"	lincRNA	-
MSTRG.40912	NW_011550995.1	1166234	1168391	-	2158	2033	0.327005	class_code "o"	Sense-lncRNA	-
MSTRG.40925	NW_011550996.1	457518	458756	+	1239	980	0.241273	class_code "u"	lincRNA	-
MSTRG.40949	NW_011550997.1	355681	356077	-	397	292	3.00033	class_code "x"	NAT-lncRNA	III
MSTRG.40980	NW_011550999.1	751000	754419	+	3420	3396	0.558707	class_code "x"	NAT-lncRNA	III
MSTRG.40996	NW_011551001.1	110982	121832	+	10851	270	0.612972	class_code "x"	NAT-lncRNA	III
MSTRG.41008	NW_011551001.1	409962	410445	+	484	417	1.76901	class_code "x"	NAT-lncRNA	I
MSTRG.41087	NW_011551005.1	209067	211260	+	2194	2025	0.338725	class_code "i"	Intronic-lncRNA	-
MSTRG.41099	NW_011551006.1	124028	126730	+	2703	501	1.40152	class_code "i"	Intronic-lncRNA	-
MSTRG.41108	NW_011551006.1	237505	240919	-	3415	2427	0.925425	class_code "u"	lincRNA	-
MSTRG.41128	NW_011551006.1	576441	576748	-	308	258	1.61123	class_code "x"	NAT-lncRNA	III
MSTRG.41131	NW_011551006.1	600332	654435	-	54104	262	0.274976	class_code "x"	NAT-lncRNA	I
MSTRG.41141	NW_011551006.1	743708	749786	+	6079	451	0.428951	class_code "i"	Intronic-lncRNA	-
MSTRG.41163	NW_011551007.1	296207	296661	+	455	268	0.226417	class_code "u"	lincRNA	-
MSTRG.41215	NW_011551008.1	811156	811498	+	343	307	0.336669	class_code "u"	lincRNA	-
MSTRG.41244	NW_011551009.1	519551	527983	-	8433	4319	0.421067	class_code "u"	lincRNA	-
MSTRG.41326	NW_011551012.1	1081038	1084173	-	3136	1152	2.97754	class_code "u"	lincRNA	-
MSTRG.41330	NW_011551013.1	341770	342052	-	283	254	0.379871	class_code "x"	NAT-lncRNA	I
MSTRG.41372	NW_011551014.1	667746	668343	+	598	514	0.289206	class_code "u"	lincRNA	-
MSTRG.41421	NW_011551017.1	376438	381179	+	4742	1802	2.82539	class_code "x"	NAT-lncRNA	V
MSTRG.41420	NW_011551017.1	376438	381179	-	4742	4484	5.43453	class_code "u"	lincRNA	-
MSTRG.41474	NW_011551019.1	357259	367421	+	10163	2595	0.499251	class_code "x"	NAT-lncRNA	III
MSTRG.41529	NW_011551022.1	252970	254506	+	1537	757	0.136807	class_code "x"	NAT-lncRNA	III
MSTRG.41533	NW_011551022.1	370350	370730	-	381	210	0.293546	class_code "u"	lincRNA	-
MSTRG.41564	NW_011551023.1	109722	110806	-	1085	888	0.573675	class_code "x"	NAT-lncRNA	III
MSTRG.41661	NW_011551028.1	90660	91861	-	1202	1126	1.37538	class_code "x"	NAT-lncRNA	III
MSTRG.41666	NW_011551028.1	350120	350547	-	428	214	0.148789	class_code "u"	lincRNA	-
MSTRG.41729	NW_011551030.1	59962	67028	+	7067	968	12.505	class_code "x"	NAT-lncRNA	V
MSTRG.41771	NW_011551031.1	677540	681557	+	4018	2626	3.98565	class_code "x"	NAT-lncRNA	VI
MSTRG.41849	NW_011551037.1	476216	477658	+	1443	1325	2.41085	class_code "u"	lincRNA	-
MSTRG.41876	NW_011551039.1	237545	241962	-	4418	1442	0.707967	class_code "u"	lincRNA	-
MSTRG.41877	NW_011551039.1	262371	265010	+	2640	2483	1.2829	class_code "u"	lincRNA	-
MSTRG.41878	NW_011551039.1	266741	268832	+	2092	1962	21.2104	class_code "u"	lincRNA	-
MSTRG.41977	NW_011551044.1	395492	400192	+	4701	1505	1.30384	class_code "u"	lincRNA	-
MSTRG.42057	NW_011551047.1	191634	197936	+	6303	1000	0.831005	class_code "x"	NAT-lncRNA	III
MSTRG.42075	NW_011551048.1	166339	182791	-	16453	229	0.139979	class_code "u"	lincRNA	-
MSTRG.42109	NW_011551049.1	454198	456124	+	1927	1845	0.507597	class_code "x"	NAT-lncRNA	III
MSTRG.42114	NW_011551050.1	1336	3957	-	2622	2595	0.268897	class_code "u"	lincRNA	-
MSTRG.42134	NW_011551051.1	56875	60206	+	3332	2709	0.776754	class_code "i"	Intronic-lncRNA	-
MSTRG.42149	NW_011551052.1	264686	265078	-	393	279	0.505492	class_code "u"	lincRNA	-
MSTRG.42172	NW_011551054.1	38968	39399	+	432	293	1.71216	class_code "x"	NAT-lncRNA	III
MSTRG.42222	NW_011551056.1	559058	560965	-	1908	1760	0.194741	class_code "u"	lincRNA	-
MSTRG.42243	NW_011551057.1	166421	167045	+	625	571	1.23055	class_code "u"	lincRNA	-
MSTRG.42327	NW_011551060.1	567120	572840	+	5721	2706	5.51662	class_code "u"	lincRNA	-
MSTRG.42373	NW_011551063.1	156940	164280	+	7341	260	0.653042	class_code "u"	lincRNA	-
MSTRG.42406	NW_011551066.1	353116	353788	+	673	604	0.274233	class_code "i"	Intronic-lncRNA	-
MSTRG.42518	NW_011551073.1	169865	172560	+	2696	285	0.141063	class_code "u"	lincRNA	-
MSTRG.42542	NW_011551075.1	803178	809980	-	6803	229	0.166664	class_code "u"	lincRNA	-
MSTRG.42622	NW_011551080.1	429207	429632	+	426	224	15.3335	class_code "x"	NAT-lncRNA	III
MSTRG.42926	NW_011551101.1	139857	140232	+	376	230	0.14069	class_code "x"	NAT-lncRNA	III
MSTRG.43006	NW_011551108.1	149316	149646	+	331	260	0.154009	class_code "x"	NAT-lncRNA	III
MSTRG.43033	NW_011551109.1	392209	392978	-	770	683	0.868412	class_code "u"	lincRNA	-
MSTRG.43087	NW_011551115.1	379210	399054	+	19845	1645	14.9079	class_code "x"	NAT-lncRNA	II
MSTRG.43086	NW_011551115.1	386684	388257	-	1574	410	1.89292	class_code "o"	Sense-lncRNA	-
MSTRG.43136	NW_011551119.1	32271	63402	-	31132	1405	0.22442	class_code "u"	lincRNA	-
MSTRG.43275	NW_011551125.1	377127	377654	+	528	473	0.304058	class_code "u"	lincRNA	-
MSTRG.43293	NW_011551127.1	209521	212711	+	3191	1316	0.794883	class_code "u"	lincRNA	-
MSTRG.43297	NW_011551127.1	273725	312399	-	38675	1104	1.386	class_code "x"	NAT-lncRNA	I
MSTRG.43342	NW_011551132.1	100083	100955	+	873	758	0.388698	class_code "x"	NAT-lncRNA	III
MSTRG.43452	NW_011551138.1	277919	278387	+	469	356	0.332014	class_code "u"	lincRNA	-
MSTRG.43587	NW_011551151.1	365511	373872	-	8362	4781	1.15936	class_code "i"	Intronic-lncRNA	-
MSTRG.43601	NW_011551153.1	514522	543135	-	28614	6495	7.69683	class_code "u"	lincRNA	-
MSTRG.43655	NW_011551157.1	196771	197771	+	1001	216	0.207467	class_code "u"	lincRNA	-
MSTRG.43662	NW_011551159.1	236166	236467	-	302	246	0.17345	class_code "u"	lincRNA	-
MSTRG.43699	NW_011551161.1	334704	336647	-	1944	1837	0.420545	class_code "x"	NAT-lncRNA	VI
MSTRG.43822	NW_011551171.1	223421	227167	+	3747	750	2.35646	class_code "u"	lincRNA	-
MSTRG.43942	NW_011551179.1	71053	74823	-	3771	3750	0.439382	class_code "x"	NAT-lncRNA	III
MSTRG.44084	NW_011551196.1	55996	56633	-	638	376	0.171077	class_code "u"	lincRNA	-
MSTRG.44223	NW_011551216.1	280624	281959	-	1336	1232	0.505192	class_code "o"	Sense-lncRNA	-
MSTRG.44274	NW_011551222.1	227873	247460	+	19588	294	0.677891	class_code "x"	NAT-lncRNA	VI
MSTRG.44312	NW_011551230.1	148027	151361	+	3335	3296	1.48719	class_code "x"	NAT-lncRNA	III
MSTRG.44349	NW_011551234.1	68326	74522	-	6197	2406	0.633334	class_code "x"	NAT-lncRNA	III
MSTRG.44352	NW_011551234.1	385377	386080	+	704	240	0.747888	class_code "u"	lincRNA	-
MSTRG.44372	NW_011551236.1	73170	82545	-	9376	1690	0.728064	class_code "u"	lincRNA	-
MSTRG.44443	NW_011551244.1	96751	111684	-	14934	742	0.269971	class_code "i"	Intronic-lncRNA	-
MSTRG.44444	NW_011551244.1	112880	115010	-	2131	2009	0.492629	class_code "i"	Intronic-lncRNA	-
MSTRG.44442	NW_011551244.1	116508	120854	-	4347	1002	0.438569	class_code "o"	Sense-lncRNA	-
MSTRG.44479	NW_011551249.1	25231	46223	-	20993	480	1.08511	class_code "u"	lincRNA	-
MSTRG.44488	NW_011551249.1	197220	203006	-	5787	471	0.257208	class_code "u"	lincRNA	-
MSTRG.44515	NW_011551251.1	93256	106647	-	13392	237	0.17868	class_code "u"	lincRNA	-
MSTRG.44581	NW_011551261.1	268845	269526	+	682	474	0.407119	class_code "u"	lincRNA	-
MSTRG.44616	NW_011551265.1	217942	224268	-	6327	6160	0.243079	class_code "u"	lincRNA	-
MSTRG.44766	NW_011551290.1	335515	346417	+	10903	298	0.517063	class_code "u"	lincRNA	-
MSTRG.44859	NW_011551298.1	417017	429483	+	12467	252	0.231859	class_code "u"	lincRNA	-
MSTRG.44933	NW_011551310.1	206301	206601	+	301	223	0.252396	class_code "x"	NAT-lncRNA	III
MSTRG.45063	NW_011551329.1	71545	80149	-	8605	477	0.77834	class_code "u"	lincRNA	-
MSTRG.45221	NW_011551346.1	96260	103362	+	7103	652	5.54539	class_code "u"	lincRNA	-
MSTRG.45290	NW_011551358.1	73195	73453	-	259	202	0.228215	class_code "u"	lincRNA	-
MSTRG.45298	NW_011551359.1	266984	278512	+	11529	376	0.148552	class_code "u"	lincRNA	-
MSTRG.45310	NW_011551361.1	135854	139706	-	3853	3789	0.694915	class_code "x"	NAT-lncRNA	III
MSTRG.45329	NW_011551363.1	95603	95982	-	380	263	0.179767	class_code "u"	lincRNA	-
MSTRG.45406	NW_011551372.1	82268	90474	+	8207	556	0.2346	class_code "u"	lincRNA	-
MSTRG.45405	NW_011551372.1	82268	90474	-	8207	556	0.374375	class_code "u"	lincRNA	-
MSTRG.45425	NW_011551377.1	84156	86286	-	2131	1154	0.406257	class_code "x"	NAT-lncRNA	I
MSTRG.45439	NW_011551379.1	423250	423547	-	298	245	0.238301	class_code "u"	lincRNA	-
MSTRG.45462	NW_011551382.1	2858	3909	-	1052	598	0.259146	class_code "u"	lincRNA	-
MSTRG.45485	NW_011551386.1	146517	146915	+	399	277	0.522494	class_code "x"	NAT-lncRNA	III
MSTRG.45520	NW_011551395.1	53890	79206	-	25317	806	0.561845	class_code "x"	NAT-lncRNA	III
MSTRG.45572	NW_011551406.1	6172	7196	+	1025	287	0.923783	class_code "u"	lincRNA	-
MSTRG.45606	NW_011551410.1	222142	251242	-	29101	1784	1.00249	class_code "u"	lincRNA	-
MSTRG.45667	NW_011551426.1	45409	47197	+	1789	1697	0.468633	class_code "o"	Sense-lncRNA	-
MSTRG.45676	NW_011551429.1	56614	57855	+	1242	217	0.327059	class_code "x"	NAT-lncRNA	III
MSTRG.45845	NW_011551468.1	81368	81792	-	425	312	0.560279	class_code "u"	lincRNA	-
MSTRG.45902	NW_011551482.1	26404	31688	+	5285	5178	6.10595	class_code "u"	lincRNA	-
MSTRG.45945	NW_011551493.1	201356	201966	+	611	212	0.405823	class_code "u"	lincRNA	-
MSTRG.45964	NW_011551498.1	251577	261533	+	9957	256	0.449562	class_code "u"	lincRNA	-
MSTRG.45991	NW_011551506.1	419	44024	+	43606	289	0.230739	class_code "u"	lincRNA	-
MSTRG.46032	NW_011551513.1	149483	151251	-	1769	379	1.31097	class_code "u"	lincRNA	-
MSTRG.46110	NW_011551535.1	217989	219824	-	1836	272	0.345273	class_code "u"	lincRNA	-
MSTRG.46169	NW_011551554.1	74773	75342	+	570	294	0.216422	class_code "x"	NAT-lncRNA	III
MSTRG.46259	NW_011551571.1	10940	18057	-	7118	2250	2.08373	class_code "u"	lincRNA	-
MSTRG.46469	NW_011551630.1	168019	168882	-	864	712	0.310858	class_code "u"	lincRNA	-
MSTRG.46510	NW_011551632.1	128914	129856	-	943	704	0.575101	class_code "u"	lincRNA	-
MSTRG.46525	NW_011551639.1	29784	30233	+	450	220	0.201015	class_code "u"	lincRNA	-
MSTRG.46543	NW_011551642.1	194667	199778	+	5112	421	0.515032	class_code "u"	lincRNA	-
MSTRG.46625	NW_011551677.1	94952	103494	-	8543	346	0.370736	class_code "x"	NAT-lncRNA	VI
MSTRG.46930	NW_011551780.1	57926	100981	+	43056	395	0.351887	class_code "u"	lincRNA	-
MSTRG.47134	NW_011551829.1	7123	12983	+	5861	254	0.270131	class_code "u"	lincRNA	-
MSTRG.47162	NW_011551842.1	185751	188107	-	2357	2307	0.860058	class_code "x"	NAT-lncRNA	III
MSTRG.47167	NW_011551843.1	141917	146075	-	4159	219	0.194006	class_code "u"	lincRNA	-
MSTRG.47235	NW_011551874.1	109538	112544	-	3007	642	10.7896	class_code "u"	lincRNA	-
MSTRG.47291	NW_011551897.1	92575	93911	+	1337	1150	0.294216	class_code "i"	Intronic-lncRNA	-
MSTRG.47299	NW_011551901.1	147613	175280	+	27668	2655	1.23117	class_code "u"	lincRNA	-
MSTRG.47542	NW_011552006.1	203420	203747	-	328	256	0.203737	class_code "u"	lincRNA	-
MSTRG.47546	NW_011552008.1	84383	84873	+	491	332	0.279968	class_code "u"	lincRNA	-
MSTRG.47585	NW_011552018.1	68547	69023	-	477	247	0.288012	class_code "u"	lincRNA	-
MSTRG.47591	NW_011552018.1	118793	126171	-	7379	353	0.249798	class_code "u"	lincRNA	-
MSTRG.47599	NW_011552024.1	97758	98735	+	978	414	0.230989	class_code "u"	lincRNA	-
MSTRG.47718	NW_011552065.1	86217	91016	-	4800	4727	0.941354	class_code "x"	NAT-lncRNA	III
MSTRG.47879	NW_011552143.1	21354	22999	+	1646	517	1.64085	class_code "u"	lincRNA	-
MSTRG.48025	NW_011552211.1	68534	69401	-	868	666	0.505053	class_code "u"	lincRNA	-
MSTRG.48096	NW_011552269.1	328	31932	+	31605	301	1.07796	class_code "u"	lincRNA	-
MSTRG.48124	NW_011552286.1	100269	102809	+	2541	623	0.44041	class_code "u"	lincRNA	-
MSTRG.48295	NW_011552357.1	30281	31331	+	1051	856	0.259316	class_code "u"	lincRNA	-
MSTRG.48303	NW_011552362.1	28502	39223	+	10722	224	0.316599	class_code "u"	lincRNA	-
MSTRG.48430	NW_011552414.1	22350	30172	+	7823	341	0.400223	class_code "u"	lincRNA	-
MSTRG.48470	NW_011552430.1	7101	20173	+	13073	580	49.2282	class_code "u"	lincRNA	-
MSTRG.48477	NW_011552434.1	90710	99329	+	8620	2055	0.315255	class_code "u"	lincRNA	-
MSTRG.48487	NW_011552437.1	26753	27899	+	1147	715	0.260973	class_code "x"	NAT-lncRNA	III
MSTRG.48547	NW_011552485.1	11021	75432	+	64412	771	1.4395	class_code "u"	lincRNA	-
MSTRG.48549	NW_011552485.1	45361	56604	-	11244	309	0.17816	class_code "u"	lincRNA	-
MSTRG.48560	NW_011552495.1	13796	59638	+	45843	290	72.7702	class_code "x"	NAT-lncRNA	IV
MSTRG.48566	NW_011552498.1	62964	70614	+	7651	498	0.569893	class_code "u"	lincRNA	-
MSTRG.48593	NW_011552511.1	17137	27759	+	10623	374	0.170558	class_code "u"	lincRNA	-
MSTRG.48598	NW_011552512.1	87029	87699	+	671	243	0.192798	class_code "u"	lincRNA	-
MSTRG.48631	NW_011552527.1	67280	70042	-	2763	785	0.196525	class_code "u"	lincRNA	-
MSTRG.48684	NW_011552589.1	7806	49473	+	41668	227	0.174036	class_code "u"	lincRNA	-
MSTRG.48721	NW_011552598.1	80814	86140	-	5327	427	8.12006	class_code "u"	lincRNA	-
MSTRG.48807	NW_011552667.1	57	1079	+	1023	327	0.295806	class_code "u"	lincRNA	-
MSTRG.48888	NW_011552704.1	7973	9157	-	1185	232	0.454017	class_code "u"	lincRNA	-
MSTRG.48905	NW_011552719.1	35773	50072	+	14300	447	0.197747	class_code "u"	lincRNA	-
MSTRG.48907	NW_011552719.1	73467	74718	-	1252	1083	9.41399	class_code "u"	lincRNA	-
MSTRG.49036	NW_011552805.1	16204	16580	+	377	264	1.12162	class_code "u"	lincRNA	-
MSTRG.49166	NW_011552905.1	21094	30774	+	9681	528	2.82782	class_code "u"	lincRNA	-
MSTRG.49181	NW_011552919.1	10004	10435	-	432	344	0.233427	class_code "u"	lincRNA	-
MSTRG.49193	NW_011552925.1	57512	58143	-	632	234	1.60812	class_code "u"	lincRNA	-
MSTRG.49197	NW_011552932.1	30114	36735	-	6622	224	0.358716	class_code "u"	lincRNA	-
MSTRG.49220	NW_011552942.1	70915	74881	-	3967	971	1.25307	class_code "u"	lincRNA	-
MSTRG.49246	NW_011552966.1	67644	68119	+	476	454	0.55198	class_code "u"	lincRNA	-
MSTRG.49407	NW_011553154.1	38681	45090	-	6410	367	0.453809	class_code "u"	lincRNA	-
MSTRG.49416	NW_011553157.1	14046	51727	-	37682	2293	1.53526	class_code "x"	NAT-lncRNA	IV
MSTRG.49559	NW_011553319.1	25930	27537	-	1608	708	0.249774	class_code "u"	lincRNA	-
MSTRG.49561	NW_011553319.1	31898	41070	-	9173	1417	0.389988	class_code "o"	Sense-lncRNA	-
MSTRG.49629	NW_011553399.1	14397	21157	+	6761	1569	2.37875	class_code "u"	lincRNA	-
MSTRG.49681	NW_011553438.1	7734	14249	+	6516	4186	0.323832	class_code "u"	lincRNA	-
MSTRG.49707	NW_011553475.1	26617	27149	+	533	482	0.432725	class_code "u"	lincRNA	-
MSTRG.49901	NW_011553640.1	1727	2286	-	560	420	0.740374	class_code "u"	lincRNA	-
MSTRG.50054	NW_011553827.1	1743	27185	-	25443	864	0.604845	class_code "u"	lincRNA	-
MSTRG.50055	NW_011553827.1	1743	26830	+	25088	509	0.129534	class_code "u"	lincRNA	-
MSTRG.50130	NW_011553942.1	29008	29407	-	400	287	0.159318	class_code "u"	lincRNA	-
MSTRG.50200	NW_011554053.1	10048	10550	-	503	402	3.69908	class_code "x"	NAT-lncRNA	III
MSTRG.50250	NW_011554151.1	4422	22062	-	17641	234	0.309254	class_code "u"	lincRNA	-
MSTRG.50266	NW_011554163.1	32590	33671	+	1082	746	0.199111	class_code "x"	NAT-lncRNA	VI
MSTRG.50332	NW_011554265.1	22948	24330	-	1383	514	0.224636	class_code "u"	lincRNA	-
MSTRG.50370	NW_011554377.1	32038	48965	+	16928	270	0.232284	class_code "u"	lincRNA	-
MSTRG.50373	NW_011554381.1	1	42504	-	42504	1361	3.45311	class_code "u"	lincRNA	-
MSTRG.50417	NW_011554450.1	20697	21552	+	856	733	0.186188	class_code "u"	lincRNA	-
MSTRG.50472	NW_011554594.1	48908	49277	+	370	257	0.685798	class_code "u"	lincRNA	-
MSTRG.50567	NW_011554793.1	291	733	-	443	215	0.221397	class_code "u"	lincRNA	-
MSTRG.50640	NW_011554942.1	11394	12619	-	1226	314	0.28162	class_code "x"	NAT-lncRNA	II
MSTRG.50658	NW_011554975.1	1181	2869	+	1689	1115	0.62474	class_code "u"	lincRNA	-
MSTRG.50695	NW_011555068.1	582	2682	-	2101	266	0.33835	class_code "u"	lincRNA	-
MSTRG.50726	NW_011555131.1	7433	7769	-	337	225	0.353072	class_code "u"	lincRNA	-
MSTRG.50840	NW_011555387.1	5470	16253	-	10784	996	13.8394	class_code "u"	lincRNA	-
MSTRG.50850	NW_011555417.1	13134	35777	-	22644	339	0.209989	class_code "u"	lincRNA	-
MSTRG.50902	NW_011555520.1	3408	10909	-	7502	435	1.14226	class_code "u"	lincRNA	-
MSTRG.50914	NW_011555563.1	17249	17643	+	395	283	0.311773	class_code "u"	lincRNA	-
MSTRG.51232	NW_011556526.1	12377	12703	+	327	255	0.301161	class_code "u"	lincRNA	-
MSTRG.51243	NW_011556577.1	490	1406	-	917	543	6.26511	class_code "u"	lincRNA	-
MSTRG.51300	NW_011556796.1	4691	9956	-	5266	213	0.168865	class_code "u"	lincRNA	-
MSTRG.51338	NW_011556903.1	1917	9175	+	7259	206	0.153526	class_code "u"	lincRNA	-
MSTRG.51347	NW_011556936.1	775	5799	-	5025	2977	0.621783	class_code "u"	lincRNA	-
MSTRG.51361	NW_011556978.1	3333	12338	-	9006	1251	3.56617	class_code "u"	lincRNA	-
MSTRG.51466	NW_011557346.1	3432	4989	-	1558	697	0.433216	class_code "u"	lincRNA	-
MSTRG.51478	NW_011557393.1	6064	6589	-	526	443	17.01	class_code "u"	lincRNA	-
MSTRG.51509	NW_011557567.1	3862	5167	-	1306	1218	0.297296	class_code "u"	lincRNA	-
MSTRG.51510	NW_011557573.1	1	3120	+	3120	970	0.963294	class_code "u"	lincRNA	-
MSTRG.51558	NW_011557770.1	2531	3333	-	803	763	0.297597	class_code "u"	lincRNA	-
MSTRG.51648	NW_011558147.1	4475	5311	-	837	756	0.573762	class_code "u"	lincRNA	-
MSTRG.51674	NW_011558260.1	2	4750	-	4749	3624	0.648929	class_code "u"	lincRNA	-
MSTRG.51710	NW_011558394.1	499	1743	-	1245	1059	0.435654	class_code "u"	lincRNA	-
MSTRG.51712	NW_011558400.1	757	1483	-	727	649	0.303866	class_code "u"	lincRNA	-
MSTRG.51732	NW_011558481.1	1439	3219	+	1781	651	1.37452	class_code "u"	lincRNA	-
MSTRG.51807	NW_011558760.1	471	5086	-	4616	1443	4.53568	class_code "u"	lincRNA	-
MSTRG.51855	NW_011558966.1	1	2066	-	2066	1220	1.81114	class_code "u"	lincRNA	-
MSTRG.51856	NW_011558967.1	3190	4921	-	1732	1237	7.39232	class_code "u"	lincRNA	-
MSTRG.51980	NW_011559417.1	3596	4012	+	417	324	0.1489	class_code "u"	lincRNA	-
MSTRG.51982	NW_011559422.1	67	732	+	666	237	0.322303	class_code "u"	lincRNA	-
MSTRG.52044	NW_011559654.1	1	2589	+	2589	2464	8.66074	class_code "u"	lincRNA	-
MSTRG.52121	NW_011559922.1	14	3415	+	3402	422	0.241345	class_code "u"	lincRNA	-
MSTRG.52125	NW_011559935.1	1316	2234	-	919	290	26.1257	class_code "u"	lincRNA	-
MSTRG.52167	NW_011560097.1	1	4261	+	4261	4180	0.32684	class_code "u"	lincRNA	-
MSTRG.52205	NW_011560219.1	559	2973	-	2415	2323	0.186689	class_code "u"	lincRNA	-
MSTRG.52244	NW_011560370.1	872	1722	-	851	424	23.1754	class_code "u"	lincRNA	-
MSTRG.52384	NW_011560825.1	1527	2129	+	603	490	1.2208	class_code "u"	lincRNA	-
MSTRG.52426	NW_011561046.1	1	2427	-	2427	2327	1.7783	class_code "u"	lincRNA	-
MSTRG.52451	NW_011561137.1	493	1095	-	603	435	4.89386	class_code "u"	lincRNA	-
MSTRG.52481	NW_011561297.1	4935	6049	+	1115	405	0.372317	class_code "u"	lincRNA	-
MSTRG.52487	NW_011561319.1	33	669	-	637	548	13.2299	class_code "u"	lincRNA	-
MSTRG.52561	NW_011561679.1	7401	8336	-	936	295	12.6144	class_code "u"	lincRNA	-
MSTRG.52625	NW_011561946.1	512	2834	-	2323	2018	0.795136	class_code "u"	lincRNA	-
MSTRG.52798	NW_011562633.1	1164	1514	-	351	206	0.156128	class_code "u"	lincRNA	-
MSTRG.52809	NW_011562683.1	2072	3696	+	1625	891	0.268643	class_code "u"	lincRNA	-
MSTRG.52820	NW_011562719.1	1	2372	-	2372	2259	2.68052	class_code "u"	lincRNA	-
MSTRG.52821	NW_011562719.1	2768	3692	+	925	810	1.55035	class_code "u"	lincRNA	-
MSTRG.52878	NW_011562996.1	1	2436	-	2436	1966	0.399245	class_code "o"	Sense-lncRNA	-
MSTRG.52910	NW_011563152.1	1410	2887	-	1478	689	3.64134	class_code "u"	lincRNA	-
MSTRG.52927	NW_011563290.1	54	1734	-	1681	1562	0.141441	class_code "u"	lincRNA	-
MSTRG.52990	NW_011563579.1	273	1256	+	984	949	0.529149	class_code "x"	NAT-lncRNA	II
MSTRG.53058	NW_011563872.1	46	712	-	667	211	0.171482	class_code "u"	lincRNA	-
MSTRG.53207	NW_011564582.1	35	3352	-	3318	1070	40.2707	class_code "u"	lincRNA	-
MSTRG.53220	NW_011564668.1	2107	3098	-	992	417	0.599864	class_code "u"	lincRNA	-
MSTRG.53238	NW_011564761.1	1783	2208	-	426	314	0.416237	class_code "x"	NAT-lncRNA	I
MSTRG.53247	NW_011564791.1	339	2108	-	1770	644	1.73922	class_code "u"	lincRNA	-
MSTRG.53248	NW_011564798.1	2880	3159	-	280	208	0.245084	class_code "u"	lincRNA	-
MSTRG.53298	NW_011564988.1	1	3327	-	3327	3292	7.48954	class_code "u"	lincRNA	-
MSTRG.53302	NW_011565006.1	2619	2939	-	321	226	0.137094	class_code "u"	lincRNA	-
MSTRG.53370	NW_011565286.1	2195	3289	+	1095	739	18.7317	class_code "u"	lincRNA	-
MSTRG.53431	NW_011565599.1	698	1795	+	1098	1016	1.10569	class_code "u"	lincRNA	-
MSTRG.53442	NW_011565636.1	720	2057	+	1338	464	0.171672	class_code "u"	lincRNA	-
MSTRG.53447	NW_011565672.1	1	1650	+	1650	1079	0.23321	class_code "u"	lincRNA	-
MSTRG.53471	NW_011565788.1	20	360	-	341	225	0.454562	class_code "u"	lincRNA	-
MSTRG.53550	NW_011566153.1	1112	3187	-	2076	1933	0.205629	class_code "u"	lincRNA	-
MSTRG.53605	NW_011566422.1	1805	3143	-	1339	1059	0.351489	class_code "u"	lincRNA	-
MSTRG.53636	NW_011566565.1	2289	2720	-	432	331	0.581709	class_code "x"	NAT-lncRNA	VI
MSTRG.53682	NW_011566769.1	1913	3044	-	1132	1112	3.30576	class_code "u"	lincRNA	-
MSTRG.53690	NW_011566817.1	5057	6737	+	1681	1475	1.30423	class_code "u"	lincRNA	-
MSTRG.53832	NW_011567543.1	797	2498	-	1702	1111	7.39468	class_code "u"	lincRNA	-
MSTRG.53936	NW_011568179.1	1018	2985	-	1968	1132	6.32267	class_code "u"	lincRNA	-
MSTRG.53988	NW_011568477.1	2613	2955	-	343	261	0.815682	class_code "u"	lincRNA	-
MSTRG.54011	NW_011568578.1	49	2634	-	2586	564	1.01905	class_code "u"	lincRNA	-
MSTRG.54105	NW_011569172.1	1	1091	-	1091	969	0.401837	class_code "u"	lincRNA	-
MSTRG.54140	NW_011569354.1	2426	2819	-	394	266	2.07222	class_code "u"	lincRNA	-
MSTRG.54161	NW_011569461.1	1	2858	-	2858	2316	2.16115	class_code "u"	lincRNA	-
MSTRG.54180	NW_011569536.1	1086	2111	+	1026	989	3.37516	class_code "x"	NAT-lncRNA	V
MSTRG.54219	NW_011569706.1	1	2367	-	2367	2028	3.20663	class_code "u"	lincRNA	-
MSTRG.54231	NW_011569753.1	1678	2214	+	537	452	0.450179	class_code "u"	lincRNA	-
MSTRG.54326	NW_011570210.1	1	1943	-	1943	1823	2.35449	class_code "u"	lincRNA	-
MSTRG.54482	NW_011571198.1	458	2747	+	2290	2237	0.943344	class_code "o"	Sense-lncRNA	-
MSTRG.54568	NW_011571629.1	11	1241	+	1231	841	0.202926	class_code "u"	lincRNA	-
MSTRG.54654	NW_011572158.1	58	2675	-	2618	2530	0.24838	class_code "u"	lincRNA	-
MSTRG.54800	NW_011572859.1	110	2609	-	2500	1266	0.361679	class_code "u"	lincRNA	-
MSTRG.54813	NW_011572916.1	968	1912	-	945	330	1.17769	class_code "u"	lincRNA	-
MSTRG.54828	NW_011573106.1	146	1807	-	1662	1413	3.35156	class_code "u"	lincRNA	-
MSTRG.54895	NW_011573548.1	1422	1775	-	354	257	3.24607	class_code "u"	lincRNA	-
MSTRG.54936	NW_011573866.1	61	1786	-	1726	1330	0.745852	class_code "u"	lincRNA	-
MSTRG.54956	NW_011574043.1	1996	2573	+	578	546	1.18297	class_code "x"	NAT-lncRNA	I
MSTRG.55263	NW_011576029.1	51	1082	-	1032	936	2.63808	class_code "u"	lincRNA	-
MSTRG.55408	NW_011577023.1	570	2387	+	1818	238	0.173326	class_code "u"	lincRNA	-
MSTRG.55431	NW_011577158.1	479	795	-	317	247	3.407	class_code "u"	lincRNA	-
MSTRG.55433	NW_011577166.1	1085	1440	-	356	222	0.179163	class_code "u"	lincRNA	-
MSTRG.55434	NW_011577171.1	1	1211	+	1211	958	8.12756	class_code "u"	lincRNA	-
MSTRG.55437	NW_011577201.1	21	716	+	696	579	0.936358	class_code "u"	lincRNA	-
MSTRG.55443	NW_011577301.1	1160	2379	-	1220	787	3.75406	class_code "u"	lincRNA	-
MSTRG.55514	NW_011577674.1	389	862	+	474	209	3.93182	class_code "u"	lincRNA	-
MSTRG.55616	NW_011578303.1	26	1135	-	1110	730	5.02175	class_code "u"	lincRNA	-
MSTRG.55643	NW_011578454.1	1	2369	+	2369	2291	0.635085	class_code "u"	lincRNA	-
MSTRG.55667	NW_011578614.1	767	1376	-	610	327	0.304084	class_code "u"	lincRNA	-
MSTRG.55733	NW_011579190.1	1	2347	-	2347	1572	2.05572	class_code "u"	lincRNA	-
MSTRG.55797	NW_011579716.1	452	1367	-	916	327	0.20163	class_code "u"	lincRNA	-
MSTRG.55871	NW_011580244.1	8	2274	-	2267	1060	0.552526	class_code "u"	lincRNA	-
MSTRG.55883	NW_011580373.1	556	1186	-	631	503	0.724028	class_code "u"	lincRNA	-
MSTRG.55902	NW_011580508.1	1557	2214	-	658	439	0.146526	class_code "u"	lincRNA	-
MSTRG.55906	NW_011580558.1	334	691	-	358	233	2.55436	class_code "u"	lincRNA	-
MSTRG.55985	NW_011581066.1	20	824	+	805	688	0.932401	class_code "u"	lincRNA	-
MSTRG.56006	NW_011581189.1	82	639	-	558	216	0.593863	class_code "u"	lincRNA	-
MSTRG.56031	NW_011581377.1	1064	1690	-	627	396	2.77821	class_code "u"	lincRNA	-
MSTRG.56087	NW_011581801.1	30	290	+	261	224	0.409209	class_code "u"	lincRNA	-
MSTRG.56110	NW_011581943.1	1506	1932	+	427	333	0.207655	class_code "u"	lincRNA	-
MSTRG.56131	NW_011582052.1	43	595	-	553	372	1.77852	class_code "u"	lincRNA	-
MSTRG.56141	NW_011582158.1	22	1142	-	1121	851	0.233722	class_code "u"	lincRNA	-
MSTRG.56153	NW_011582218.1	316	2109	+	1794	898	0.935463	class_code "u"	lincRNA	-
MSTRG.56180	NW_011582348.1	321	829	-	509	417	3.02754	class_code "u"	lincRNA	-
MSTRG.56201	NW_011582500.1	430	2114	-	1685	485	0.256305	class_code "u"	lincRNA	-
MSTRG.56242	NW_011582882.1	1528	2189	-	662	509	0.157969	class_code "u"	lincRNA	-
MSTRG.56357	NW_011583464.1	1	2202	-	2202	2110	1.5346	class_code "u"	lincRNA	-
MSTRG.56421	NW_011584043.1	651	1838	-	1188	1091	0.596569	class_code "u"	lincRNA	-
MSTRG.56507	NW_011584702.1	489	771	-	283	226	0.134722	class_code "u"	lincRNA	-
MSTRG.56533	NW_011584864.1	587	1515	-	929	207	0.231766	class_code "u"	lincRNA	-
MSTRG.56732	NW_011586374.1	593	1377	-	785	322	0.933909	class_code "u"	lincRNA	-
MSTRG.56740	NW_011586457.1	429	802	-	374	296	2.09635	class_code "u"	lincRNA	-
MSTRG.56741	NW_011586457.1	1053	2113	-	1061	261	0.959328	class_code "u"	lincRNA	-
MSTRG.56755	NW_011586552.1	110	562	-	453	222	0.375711	class_code "u"	lincRNA	-
MSTRG.56773	NW_011586652.1	42	1230	-	1189	930	1.76403	class_code "u"	lincRNA	-
MSTRG.56840	NW_011587249.1	1	2094	+	2094	2002	2.89085	class_code "u"	lincRNA	-
MSTRG.57025	NW_011588770.1	1	2054	-	2054	871	1.5495	class_code "u"	lincRNA	-
MSTRG.57118	NW_011589547.1	318	579	-	262	234	0.329871	class_code "u"	lincRNA	-
MSTRG.57223	NW_011590197.1	785	1105	-	321	207	0.4221	class_code "u"	lincRNA	-
MSTRG.57253	NW_011590454.1	18	1984	+	1967	1342	0.469894	class_code "u"	lincRNA	-
MSTRG.57281	NW_011590641.1	1	1993	+	1993	252	0.322277	class_code "u"	lincRNA	-
*FPKM values derived from strand-specific sequencing in this study.
&The length of the longest transcript isoform from the LncRNA loci.
#Class_code “u”, “i”, “o” and “x” results from cuffcompare analysis, which represent novel intergenic, intronic, sense-overlapped and cis-antisense transcripts, respectively
