# Supplementary material for: Genome-wide discovery and characterization of long noncoding RNAs in African oil palm (Elaeis guineensis Jacq.)
Source: PeerJ. 2020 Nov 2;8:e9585. doi: 10.7717/peerj.9585 (PMC7643553; doi:10.7717/peerj.9585)
Supplement: Supplemental Information 6 [file peerj-08-9585-s006.xlsx]

## Sheet: Table S5
Table S5 FPKM values for lncRNAs that excluded intronic-lncRNAs and NAT-lncRNAs whose transcripts overlapped with protein-coding genes in 18 oil palm transcriptomes.
lncRNA name	FPKM values
	DRR053156	DRR053157	ERR1735779	SRR7812013	SRR7812014	SRR5189966	SRR5189969	ERR3385823	ERR3385825	ERR3385821	ERR3385822	ERR3385824	ERR3385826	ERR3385828	ERR1413765	ERR1413767	ERR1413766	ERR1413768
	Leaf	Male flower	Leaf , oil palm seedlings	Root, Juvenile tree (3 months)	Root, Juvenile tree (3 months)	Female inflorescences, +6 leaf stage	Female inflorescences, +15 leaf stage	mesocarp, four months	mesocarp, four months	mesocarp, five months	mesocarp, five months	mesocarp, five months	mesocarp, five months	mesocarp, five months	mesocarp, 100 DAP	mesocarp, 120 DAP	mesocarp, 140 DAP	mesocarp, 160 DAP
MSTRG.105	0	4.30267	0	0	0	0	5.73424	0	0	0	0	0	0	0	0	0	0	0
MSTRG.797	0	0	0	0.400662	0	0	0	0	0	0	0	0	0	0	0	0	0	0
MSTRG.1185	0	0	0	0.322506	0.167477	0.26391	0.157654	0.0278607	0.196884	0.132418	0.100596	0.0772321	0.114399	0.0463653	0	0.143896	0	0.176534
MSTRG.1355	0	0.163372	0	0.336206	0.165612	0	0	0	0.215331	0	0.0544745	0	0.185412	0	0.252808	0.2951	0.215997	0
MSTRG.1474	0	0	0	0	0	0	0	0	0	0	0	0	0	0	0	0	0	0
MSTRG.1475	0.572623	0.895006	2.03512	0	0	0.790865	0	0	0	0.944607	0	0	0	0	0	0.921603	0	0.396557
MSTRG.1743	0	0	0	0	0	0	0	0	0	0	0	0	0	0	0	0	0	0
MSTRG.1915	0	0	0	0	0	0	0	0	0	0	0	0	0	0	0	0	0	0
MSTRG.2125	0	0	0	0	0	0	0.203882	0	0	0	0	0	0	0	0	0.710024	0.314609	0.133955
MSTRG.3057	0	0.220409	0	0.910926	0.586748	0.026642	0.0298752	0.0416635	0.147441	0.720243	0.24448	0.208293	0	0.185116	0.534279	0.623658	0.242484	0.177714
MSTRG.3678	0.27502	0	0	0	0	0	0.204506	0	0.557499	0.100282	0.522708	0	0	0	0	0.212798	0	0
MSTRG.3768	0	0	0	0	0	0	0	0	0	0	0	0	0	0	0	0	0	0
MSTRG.3810	0	0	0	0.411659	0	0	0	0	0	0	0.0873467	0	0	0	0	0	0	0
MSTRG.4389	0.0636249	0.076937	0	0.158853	0	0.150302	0	0.144728	0.102621	0	0	0.128926	0.178184	0.0965919	0	0.175629	0	0.345152
MSTRG.4403	0.108487	0.521648	0	0.47025	0.594975	0	0.515164	0.290932	0.28778	0	0	0.570062	0	0.324714	0	0.924261	0.0848784	0.64574
MSTRG.4533	0	0	0	0	0.111167	0	0	0.0409523	0	0	0	0	0.419977	0	0.58301	0.511874	0.42403	0.179797
MSTRG.4544	3.72773	5.1959	1.15792	1.61875	0	0.53456	0.0639713	0	0.327248	0	0.591767	0.331432	0.413443	0.248973	0	0.819684	0.674479	0
MSTRG.4560	0	0	0	0.304973	0	0	0.454685	0	0	0	0	0	0	0	0	0	0	0
MSTRG.4684	0	0	0	0	0	0	0	0	0.202385	0.144331	0	0	0	0	0	0	0	0
MSTRG.4762	0	0	0	0	0	0	0.0708056	0	0.0867925	0.021184	0.0221237	0	0.0502916	0	0.29167	0.0369649	0.123066	0.630435
MSTRG.4914	0	0	0	0	0	0	0.0808352	0	0	0.0456675	0	0	0.0541016	0	0	0	0.0931465	0.235773
MSTRG.5026	0	0	0	0	0	0	0	0	0	0	0	0	0	0	0	0	0	0
MSTRG.5165	0	0.0881811	0.00728624	0.253429	0.0496881	0	0.0521567	0	0.193211	0.251613	0	0	0	0.157235	0.2943	0.348001	0.109118	0.234458
MSTRG.5276	0.0178627	0.108401	0	0.789297	0.131924	0.0208523	0.0467318	0.0164356	0.154948	0.227266	0.415422	0	0.0843503	0.0547274	0.451005	0.292548	0.542293	0.104508
MSTRG.5289	0	0.106246	0	0	0	0	0.125503	0	0.0927342	0.336055	0.0701209	0.0876201	0.0794863	0.174124	0.334351	0.263377	0.143766	0
MSTRG.5603	0	0.25068	0	0.385627	0	0	0	0	0.544166	0.786778	0.57444	0.20582	0.464807	0.102105	0.598727	0.158675	0.172485	0.214548
MSTRG.6148	0.0122324	0.0297375	0	0.0615105	0	0	0.0636505	0.113064	0.0665435	0.0586178	0.0204112	0.0125277	0.0232148	0.0250765	0.615841	0.149355	0.0369651	0.214136
MSTRG.6481	0	0	0	0	0	0	0	0	0	0	0	0	0	0	0	0	0	0
MSTRG.6593	0.122861	0	0	0	0	0	0.245492	0	0	0.201045	0.268403	0.215765	0.272441	0.123109	0.256975	0	0	0.509747
MSTRG.6695	0	0	0	0	0	0	0	0	0	0	0	0	0	0	0	0	0	0
MSTRG.7396	0	0	0	0	0	0	0	0	0	0	0	0	0	0	0	0	0	0
MSTRG.7861	0	0	0	0	0	0	0	0	0	0	0	0	0	0	0	0	0	0
MSTRG.7968	0	9.48203	0	0	2.59876	0	0	0	0	0	0	0	0	0	0	0	0	0
MSTRG.8018	0	0	0	0	0	0	0	0	0	0	0	0	0	0	0	0	0	0
MSTRG.8109	0	0	0	0	0	0	0	0	0	0	0	0.0774722	0	0	0	0.457635	0	0.314786
MSTRG.8324	0	0	0	0	0	0	0	0	0	0	0	0	0	0	0	0	0	0
MSTRG.9486	0	0.0529026	0	0.245991	0.0804754	0.0511053	0	0.0200099	0.0471993	0	0.018064	0.0889022	0.0616086	0.0222235	0	0	0.199348	0.255757
MSTRG.9637	0	0	0.00650813	0.0271695	0.0177552	0.0332814	0	0.0266959	0.0941731	0.0518937	0.0240952	0.0295413	0.0753809	0.0221857	0.644763	0.106743	0.119029	0.265133
MSTRG.9962	0	0	0	0	0	0	0	0	0	0	0	0	0	0	0	0	0	0
MSTRG.10380	0	0	0	0	0	0	0	0	0	0	0	0	0	0	0.466772	0	0.811472	0
MSTRG.10670	0	0.0417129	0.00775561	0.0431551	0.0105769	0	0.0888768	0.0317823	0.121493	0	0.150604	0	0.179478	0.0616431	0	0	0	0
MSTRG.10671	0	0.028211	0	0	0	0	0.0306118	0.127946	0.176102	0	0.154008	0	0.131305	0.0473775	0	0	0	0.538287
MSTRG.10803	0	0.114016	0	0	0.115552	0	0.135881	0.0830083	0.0993063	0.215697	0.0750039	0.0938589	0	0	0.180297	0.285133	0.4661	0
MSTRG.10818	0.109858	1.58443	0	0	0.133863	0	0.596618	0	0	0	0	0	0.100626	0	0	0	0	0
MSTRG.10941	0	0.37796	0	0.357865	0.0958219	0	0	0	0	0	0	0	0	0	0	0	0	0
MSTRG.10957	0	0	0	0	0	0	0	0	0	0	0	0	0	0	0	0	0	0
MSTRG.11019	0	0.0471602	0	0.268079	0.0239139	0.0227192	0.0254638	0.0714432	0.0421097	0.0771829	0.0322468	0.0594795	0.036664	0.0198292	0.17541	0.0265712	0	0.0379328
MSTRG.11517	0	0.101553	0	0.209482	0.51485	0.100341	0.056426	0.151997	0.224991	0	0.171564	0.127263	0.389734	0	0.53853	0	0.391283	0.083059
MSTRG.11590	0.0113064	0.0962265	0	0.0710915	0.0697113	0	0	0	0	0	0	0	0	0	0.121916	0	0	0
MSTRG.11940	0.0190129	0.0462938	0	0.0638724	0.0313031	0	0.0655759	0	0.145318	0.16272	0.111562	0.0260474	0.120877	0	0.455423	0.128167	0.181067	0.224299
MSTRG.12022	0	0	0	0	0	0	0	0	0	0	0	0	0	0	0	0	0	0
MSTRG.12138	0	0	0.124266	0	0	0	0	0.357205	0.26657	0	0	0	0	0.145434	0.586178	0	0	0.84808
MSTRG.12377	0.0399021	0.0481477	0.0359807	1.34106	0.634664	0	0	0.0360737	0.0426995	0.530341	0.162866	0.0402494	0	0.120527	0	0.16731	0.24675	0.235892
MSTRG.12387	0	0	0	0	0.366103	0	0	0	0.0636288	0	0	0.120074	0	0	0.111039	0	0.0946378	0.119733
MSTRG.12826	0	0	0	0	0	0	0	0	0	0	0	0	0.78182	0	0	0	0.983418	0
MSTRG.12869	0	0	0	0	0	0	0	0	0	0	0	0	0	0	0	0	0	0
MSTRG.13825	0.429228	0.818785	0	0	0	0	0	0	0.0894269	0	0.202978	0	0	0.0839693	0	0	0	0
MSTRG.13880	0	0.340008	0	5.14657	0	1.36892	0	0	0	0.389998	0	0	0	0	0	0	0	0
MSTRG.14235	0	0	0	0	0.26578	0	0	0	0	0	0	0	0	0	0	0	0	0
MSTRG.14426	0	0	0	0.674041	0	0	0	0	0	0	0	0	0	0	0	0	0	0
MSTRG.14615	0.211287	0.507071	0.476557	0.527026	0.308844	0.409558	0.456724	0.578789	0	0	0	0	0	0.817943	0	0.342772	0	0.207718
MSTRG.14713	0	0	0	0.214352	0	0	0	0	0	0.250425	0.382908	0.0551059	0.180838	0	0	0	0	0.281386
MSTRG.15025	0	0	0	0	0	0	0	0	0	0	0	0	0	0	0	0	0	0
MSTRG.15153	0	0	0	0.152459	0	0.0747886	0	0	0	0	0	0	0	0	0.797809	0.0883626	0	0
MSTRG.15557	0	0.058191	0.0870839	0	0.117483	0.0578988	0	0.108005	0.153699	0	0.117076	0.484778	0.155123	0	0	0.613987	0	0.0956262
MSTRG.15963	0	0	0	1.9388	0	0	0	0.425817	0	0	0	0	0	0.402072	0.563749	0.159503	0	0.136311
MSTRG.15968	0	0	0.0998251	0	0	0	0.160928	0	0.229181	0.082765	0.34527	0.108384	0.097758	0	0.845458	0	0	0
MSTRG.16123	0	0.130353	0	0	0	0	0.143731	0	0	0.0564172	0	0	0	0	0.131018	0.20025	0	0
MSTRG.16368	0	0.36582	0	0	0	0	0.601629	0.239344	0	0.622078	0	0.280163	0	0	0	0	0	0
MSTRG.16567	0	0	0	0	0	0	0	0	0	0	0	0	0	0	0	0	0	0
MSTRG.16589	0	0.736353	0	2.81499	2.04183	0.195169	0	0	0.0573482	0.0418004	0.0436347	0.21638	0.0495357	0	0	0	0	0
MSTRG.16595	0	1.01406	0	0	0.293565	0.784893	0	0.520445	0	0.721761	0.47038	0.355199	0.319496	0.821099	0.46634	0	0	0
MSTRG.17004	0	0	0	0	0	0	0.0269629	0	0.0222547	0	0.0681544	0	0	0.0209582	0.111386	0.0562763	0.031275	0.120428
MSTRG.17173	0	0	0	0	0.47415	0	0.0952267	0	0	0.0190846	0.0199321	0.0245375	0.0226576	0.0245297	0.0436392	0	0	0
MSTRG.17217	0	0.228813	0.018944	0.866991	0.128916	0.0981471	0.137536	0	0.794125	0.328457	0	0.192305	0.671431	0.277771	0.62346	0.430606	0.414754	0.605349
MSTRG.17250	0	0	0	0	0	0.11067	0	0	0.197326	0	0	0	0.042686	0	0.423707	0.0651296	0	0
MSTRG.17271	0	0	0	0	0.0254536	0	0.081439	0.0759924	0.134407	0.0328403	0.0343006	0.0210957	0.0194985	0	0	0.0585336	0.125948	0.606194
MSTRG.17302	0	0.278129	0	0	0	0.0552128	0	0	0	0	0	0	0	0.115767	0	0.0649842	0.287054	0
MSTRG.17699	0	0	0	0	0	0	0	0	0	0	0	0	0	0.25848	0	0.98149	0	0
MSTRG.17892	0	0.0199052	0	0.0205785	0	0.0191143	0	0.0453062	0.0355835	0.0130511	0.0136325	0.0335024	0	0.0502754	0	0.0223394	0	0.0638994
MSTRG.18648	0	0	0	1.05611	0.263945	0.112	0.188419	0.218527	0.232053	0	0	0.364274	0.437929	0.121389	0	0.229466	0.582489	0.233366
MSTRG.18766	0	0	0.117018	0.0648357	0.0636544	0.791863	0.375856	0.0473798	0.0838888	0.737225	0.106936	0.0263402	0	0	0.891797	0.0356737	0	0.659479
MSTRG.18822	0.157836	2.73472	0.0712702	3.50483	2.756	0	0	0	0	0	0	0	0	0	0	0	0	0
MSTRG.19567	0	0	0	0	0	0	0	0	0.127118	0	0	0.120305	0	0	0	0	0	0
MSTRG.19883	0	0	0	2.2012	3.35788	0	0	0	0	0.414804	0	0	0	0.107737	0.211933	0	0	0
MSTRG.20128	0	1.07403	0.0333328	0.601331	0.953089	0.150745	0.120665	0	0.0999304	0.0879332	0.0459236	0	0.0174055	0	0.332635	0.125902	0.0280021	0.179844
MSTRG.20300	0	0.275668	0	0.190093	0.0665695	0.0751682	0.126211	0.0998976	0.141065	0.146737	0.0991867	0.0995829	0.0717934	0.132908	0.601264	0.102362	0.342134	0.125902
MSTRG.21045	0	0.314278	0.125894	0.152034	0.0676546	0	0.0726661	0	0	0.20032	0.0883736	0.39845	0.0902568	0.153186	0	0.113585	0	0
MSTRG.21905	0.0109311	0.186083	0	0.467437	0.16177	0.012687	0.156219	0.0101143	0.0773647	0.0611743	0.086729	0.0224061	0.0726879	0.0392488	0.726715	0.222138	0.445467	0.892452
MSTRG.22196	0	0.120496	0	0	0.122113	0	0	0.612377	0	0.151571	0.158103	0.495221	0.0895652	0	0.382616	0.151749	0	0
MSTRG.23137	0	1.54721	0.0379216	0.430421	0.36005	0.300722	0.056369	0.113891	0	0.48996	0.476173	0.296666	0.428307	0.253767	0.845424	0.834866	0.521189	0.571484
MSTRG.23503	0	0	0.965057	0	0.258124	0.621872	0.361675	0	0	0	0	0	0	0	0	0.711614	0	0
MSTRG.23739	0	0	0	0	0	0	0	0	0	0	0	0	0	0	0	0	0	0
MSTRG.23915	0	0.0892508	0	0.0917826	0.180939	0.0914858	0	0	0	0.0568535	0.0593285	0	0.067293	0.0735219	0.138835	0.216891	0.118856	0.747781
MSTRG.23935	0	0	0	0	0	0	0	0	0	0	0	0	0	0	0	0	0	0
MSTRG.23968	0	0.0543706	0	0	0	0	0	0	0.0962707	0.0351373	0	0	0.0416618	0.0452796	0	0	0	0
MSTRG.24063	0	0	0	0	0.0889724	0	0.507757	0.0646303	0	0	0	0.145394	0.331118	0	0.409188	0.532311	0.700337	0.440826
MSTRG.24560	0	0	0	0	0	0.053288	0.240262	0.0203028	0.0240623	0	0.145427	0.0676336	0	0.0226223	0	0.188292	0.277558	0.176469
MSTRG.24696	0.0764832	0	0	0	0	0	0	0	0	0	0	0	0	0	0	0	0.36593	0
MSTRG.24941	0	0.10907	0	1.05978	0.287599	0	0	0	0.194874	0	0	0.0733966	0.152758	0	0.421413	0.392529	0.136427	0.315486
MSTRG.25577	0	0.0209223	0	0.108228	0	0	0	0.0239116	0	0	0	0.0441164	0.0245512	0	0.78691	0.0697176	0.233147	0.317211
MSTRG.25607	0.0898698	0.812229	0	0	0	0	0	0.020153	0	0	0	0	0	0.179676	0	0	0	0
MSTRG.25818	0.0568695	0.478208	0	0.914751	0.277037	0	0	0	0.0602492	0	0	0.511553	0	0.226578	0	0	0.089186	0.9038
MSTRG.26311	0	0	0	0	0	0	0	0	0	0	0	0	0	0	0	0	0	0
MSTRG.26541	0	0.139135	0	0.0957003	0.0470268	0	0	0.0695504	0	0.210506	0.1884	0.0775729	0.107013	0.0774418	0.420363	0.268063	0.415265	0.226975
MSTRG.26667	0	0	0.0781401	0	0	0	0.369825	0	0	0	0	0.28628	0	0.135081	0	0	0	0.459328
MSTRG.26690	0	0.0733241	0	0	0	0	0	0	0.129155	0.0470152	0	0	0	0	0.338441	0.0874335	0	0
MSTRG.26734	0	0	0.00438788	0.042767	0.0538894	0	0	0	0.0794581	0	0	0	0.0370259	0.0399385	0.269113	0.0652467	0.192416	0.18791
MSTRG.26863	0	0.536708	0	0	0	0	0	0	0	0	0	0	0.0298042	0.11409	0	0	0	0
MSTRG.27009	0	0.308829	0	1.26171	0.112799	0.110426	0.124273	0.0830785	0	0	0.0750225	0.0928384	0.127796	0.0463067	0.591898	0	0	0
MSTRG.27010	0	0	0	0.463224	0.230463	0	0	0	0	0	0.142727	0	0	0	0.377393	0	0	0
MSTRG.27225	0	0	0	0.376577	0	0.094068	0	0	0.0802394	0.0194238	0	0	0.0689634	0	0.570639	0.111562	0	0
MSTRG.27414	0	0	0	0.310087	0	0	0	0	0.132569	0.289469	0.151064	0.0625509	0.457145	0.24921	0.464065	0.090002	0	0.250156
MSTRG.27484	0.18995	0	0	0	0.115966	0	0	0	0	0	0	0	0	0	0.226255	0	0	0.0939169
MSTRG.27495	0	0.129932	0	0.669328	0.0658653	0.195169	0.14661	0.43484	0.63083	0.167202	0	0.10819	0.34675	0.107848	0.496922	0.383586	0.169095	0
MSTRG.27721	0	0.0370955	0	0.0382999	0	0	0	0	0.0329987	0	0	0	0.0286559	0.0310616	0.111379	0	0	0
MSTRG.28440	0	0	0	0	0	0	0	0	0	0	0	0	0.0725659	0	0.75486	0	0.129498	0
MSTRG.28558	0	0.0136863	0	0.127404	0.111049	0.0914787	0	0	0	0.0359887	0	0.0115346	0.0855225	0	0	0.122044	0	0.106455
MSTRG.28916	0.190064	0	0	0	0	0	0	0	0	0.268858	0.980104	0.178577	0	0	0.738136	0	0	0
MSTRG.28925	0	0	0	0.11803	0	0	0.0417834	0	0.0677815	0	0.0258938	0	0	0	0.286248	0	0.0967551	0.185557
MSTRG.29343	0	0	0	0	0	0	0	0	0	0.243463	0.181368	0	0	0	0	0	0	0
MSTRG.29406	0	0.145901	0	0	0.34519	0.0479567	0.418376	0	0.344997	0.094515	0	0.331983	0	0.365175	0.274556	0.845459	0	0.317792
MSTRG.30025	0	0	0	0	0	0	0	0	0	0	0	0	0	0	0	0	0	0
MSTRG.30835	0	0	0	0.190566	0.0467466	0	0.0746228	0.0698446	0.246982	0	0.267962	0.0387613	0.197142	0.0387684	0.891194	0.129776	0.548334	0
MSTRG.31857	0	0	0	0.216962	0.215671	0	0	0	0	0	0	0	0	0	0	0	0	0
MSTRG.32789	0	0	0	0	0	0	0	0	0	0	0	0	0	0	0.841185	0	0	0.449352
MSTRG.33108	0	0	0	0	0	0	0	0	0	0	0	0	0	0.121092	0.72503	0.194345	0	0
MSTRG.33284	0	0.0159468	0	0.0494736	0	0.0152581	0.0170853	0.0121203	0.0570774	0.0942588	0.109404	0.0268652	0.0124426	0.0134427	0.0897211	0.106916	0.138892	0.229812
MSTRG.34038	0	0	0	0	0	0	0	0	0	0	0	0	0	0	0	0	0	0
MSTRG.34105	0.0129968	0.0789738	0	0.0326683	0	0.0755527	0	0.0120055	0.0424017	0.145236	0.0541839	0.02661	0.0492994	0.0399456	0.350676	0.141171	0.334048	0.278177
MSTRG.34338	0.0835372	0	0	0	0	0	0	0	0.174274	0	0.0659533	0	0	0	0.312243	0.122581	0.402076	0
MSTRG.34587	0.0248331	0	0	0	0.213562	0.116638	0.163543	0.045443	0.187698	0.432096	0.348715	0.202053	0.279802	0.277715	0	0	0	0.388709
MSTRG.34979	0	0.0522277	0	0.430888	0	0	0	0	0.0925311	0	0.105814	0.130855	0.0400599	0.0870485	0.396044	0	0.0671675	0.0855091
MSTRG.34996	0	0	0	0	0	0.0869207	0	0	0	0	0	0	0	0	0.141059	0	0	0
MSTRG.35120	0	0.152728	0	0.273886	0.10327	0.0678396	0.0650662	0.0698283	0.0912546	0.10055	0.154065	0.0601178	0.0796628	0.0515926	0.480476	0.327871	0.151243	0.422416
MSTRG.35285	0	2.46688	0	0	0	0	0	0	0	0	0	0	0.630283	0	0	0.438794	0	0
MSTRG.35915	0	0	0	0.0286896	0	0	0	0.0629803	0.0495302	0.0544378	0.0663324	0.0233244	0.0646345	0	0.0414273	0	0.139679	0.089567
MSTRG.35979	0	0.0521222	0	0	0	0	0.0282156	0	0	0.102258	0.142405	0.197098	0.0809481	0	0	0.147238	0.032723	0.293912
MSTRG.36240	0	0	0	9.55857	1.09194	0	0	0.178393	0	0.540114	0.0805508	0.0997613	0.137192	0	0.182424	0.140475	0.154988	0
MSTRG.36845	0	0	0	0.435646	0	0	0	0	0	0	0	0.171788	0	0	0	0	0	0
MSTRG.37579	0	0.234768	0	0	0	0.462272	0.0544996	0	0.0454386	0	0.156632	0.0418985	0.121549	0	0.425742	0.278427	0.48678	0.306495
MSTRG.37584	0	0	0	0	0	0	0	0	0	0	0	0	0	0	0.0733707	0.0562007	0	0
MSTRG.37721	0	0	0	0	0	0	0	0	0	0	0	0	0	0	0	0	0	0
MSTRG.37787	0	0	0	0	0	0	0	0	0	0	0	0	0	0	0	0	0	0
MSTRG.38339	0	0	0	0	0.112419	0.106664	0.0478115	0.0336063	0.0396066	0.191126	0.0606734	0.0559407	0.0344941	0.0652806	0.626105	0.174601	0.249654	0.320701
MSTRG.38436	0	0	0	0	0.0719129	0.241768	0	0	0	0	0	0.0297299	0.0548236	0	0.159517	0.202436	0.0898062	0.0574557
MSTRG.38982	0.286312	0.692433	0.200984	0	0	0.751512	0.230399	0	0.218084	0	0.203845	0	0	0	0.346822	0.793325	0.928151	0.249799
MSTRG.39578	0	0	0	0	1.1142	0	0.29392	0	0	0	0	0	0	0	0.194149	0	0	0
MSTRG.40254	0	0.353179	0	0	0	0	0	0	0.0572017	0	0	0	0	0.0269271	0	0	0	0
MSTRG.40401	0	0	0	0	0	0	0	0	0	0	0	0	0.0743791	0.0813825	0.465564	0	0	0
MSTRG.40439	0.20688	0	0.185947	0.849624	0.167417	0	0	0.304709	0.181356	0.105493	0	0.136952	0.0624524	0.408993	0.767166	0.0995442	0	0.137789
MSTRG.40538	0	0.15018	0	1.62337	0.380617	0	0.0856691	0.111195	0.594906	0.304712	0.0502166	0	0.113974	0.155325	0.231341	0.269174	0.197317	0.374121
MSTRG.40766	0	0.112803	0	0	0	0	0	0	0	0.071169	0	0	0.0841403	0	0	0	0	0
MSTRG.40980	0	0	0	0.0171455	0.0168159	0.126987	0	0.0377946	0	0.0653181	0	0	0.0387991	0.0139739	0.3192	0.22248	0	0.132796
MSTRG.41474	0	0	0	0.11434	0	0	0	0	0.0988112	0	0.045411	0.0186082	0.103269	0	0	0.0497795	0.0276803	0.320023
MSTRG.41529	0	0	0	0	0	0	0	0	0.0831814	0.0603796	0.0630031	0	0	0	0.296759	0.116233	0	0.319568
MSTRG.41661	0	0.972165	0.0427846	0.117905	0.0579811	0	0.319933	0	0	0	0	0	0	0.142747	0	0	0.812721	0.751328
MSTRG.42109	0.0531914	0.0322047	0	0	0	0.0312756	0	0.0485998	0.143435	0.147044	0.153567	0.108092	0.0997407	0.0810241	0.481893	0.43967	0.0813258	0
MSTRG.43942	0	0.0597095	0	0.0154382	0	0.0142695	0.047929	0.034052	0.0801657	0	0	0.0125769	0.0116528	0	0	0.0833075	0.0742255	0.143325
MSTRG.44349	0	0.529663	0	0.346307	0.61869	0.43986	0.493024	0	0.0214434	0.0471614	0	0.0605782	0.0373374	0.0403896	0.393186	0.0270779	0.120409	0.463774
MSTRG.45310	0	0.354365	0	0.595555	0.0449257	0	0.0948008	0.224563	0.489006	0	0	0.330037	0	0.224124	0.458633	0.263641	0.146817	0.378011
MSTRG.46169	0	0	0	0	0	0	0	0	0	0	0	0	0	0	0	0	0	0
MSTRG.47718	0	0.378734	0	0.286214	0.0712393	0.0892633	0.0999015	0.151544	0.201054	0.272414	0.120693	0.177672	0.29288	0.266802	0.398653	0.260669	0.391785	0.317845
MSTRG.48487	0	0	0	0	0	0	0.120887	0	0	0	0	0	0	0	0.483886	0.126837	0	0.173614
MSTRG.52990	0	0	0	0	0	0	0	0	0	0	0	0	0	0	0.108555	0	0	0
MSTRG.449	0	0	0.111299	0	0	0	0	0	0	0	0.0335582	0	0	0	0	0	0.0636811	0
MSTRG.1416	0	0.646824	0	0	0.654506	0	0	0.215515	0	0	0	0	0	0	0	0	0	0
MSTRG.1825	0	0.430323	0	0.0986358	0	0	0	0	0	0	0	0	0	0	0.146889	0.0361465	0	0
MSTRG.2400	0	0.462329	0.0577965	0.396571	0.703027	0	0.176201	0.228014	0.0677938	0	0	0	0	0	0.118858	0.0922849	0.202857	0
MSTRG.2810	0.910931	1.25825	0.440816	0.51779	0	0.0855376	0.483168	0	0.0736639	0.160657	0.167664	0	0.190208	0.276864	0	0.101276	0.222274	0
MSTRG.2883	0.814286	1.10172	1.7685	1.98121	2.79088	3.99986	4.04883	0	0.476698	0.258043	0	0.112744	0	0.111757	0	0	0.191445	0
MSTRG.3535	0	0	0	0	0	0	0	0	0	0	0	0	0	0	0	0	0	0
MSTRG.3706	0	0.2247	0	0	0	0	0	0	0	0	0	0	0.47787	0.354612	0	0	0	0
MSTRG.4042	0	0	0	1.35879	3.14198	0	0	0.278695	0	0.378143	0	0	0	0	0	0	0	0
MSTRG.4453	0	0.190817	0	0	0	0	0	0.292786	0	0	0	0	0	0	0.415492	0.378195	0.924141	0.511875
MSTRG.5324	0.575707	0	0.30588	0	0.24378	0.270016	0.306582	0.345038	0.361336	0.853464	0.582379	0.335588	0.803627	0.569823	0.78353	0.919774	0.662422	0.06511
MSTRG.5533	0.102563	0.229514	1.0282	0.905902	0	0.255	0	0.174594	0.19066	0.621733	0.43759	0	0.444705	0.10596	0.15348	0.201523	0.30495	0.134399
MSTRG.6066	0	0.293745	0	3.15797	1.19051	0	0	0	0	0	0	0	0	0	0.236644	0	0	0
MSTRG.6151	0	0	0	0	0	0	0	0	0	0.0395371	0	0	0	0	0	0	0	0.30308
MSTRG.6678	0	0	0	0.426207	0.148804	0	0	0	0	0	0	0	0	0	0.190058	0	0	0.381386
MSTRG.7095	0	0	0	0	0	0	0	0	0	0	0	0	0	0	0	0	0	0
MSTRG.7206	0	0	0	0	0	0.0724269	0.111064	0.40637	0	0	0.484024	0	0	0.669308	0.360672	0	0	0.241498
MSTRG.7564	0	16.0359	0	95.333	86.4134	0	0	0	0	0	0	0	0	0	0	0	0	0
MSTRG.9556	0	0	0	0	0	0	0	0	0	0	0	0	0	0	0	0	0	0
MSTRG.10432	0	0	0	0	0	0	0	0	0	0	0	0	0	0	0	0	0	0
MSTRG.11474	0	0	0	0.223107	0.0548463	0	0	0	0	0	0.0365017	0	0.0829092	0	0	0.0630828	0.139374	0
MSTRG.12384	0	1.25291	0.234981	1.12834	1.27012	0.0794224	0	0.521084	0.550974	0.200429	0.104593	0.130001	0.2967	0.711996	0	0	0	0
MSTRG.12524	0	0	0	0	0.206557	0	0	0	0	0	0	0	0	0	0	0	0	0
MSTRG.12655	0	0	0	53.0471	36.2072	0	0	0.649328	0	0.799943	0	0	0	0	0	0	0	0
MSTRG.12777	0	0	0	0.0548284	0.107623	0	0	0	0	0	0	0	0	0	0.118648	0.0299939	0	0.0855125
MSTRG.13309	0	0.257416	0	0	0	0	0	0	0	0	0	0	0	0	0	0	0	0.18748
MSTRG.13684	0	0	0	0	0	0	0	0	0	0	0	0	0	0	0	0	0	0
MSTRG.14178	0	0	0.099218	1.0647	0.708197	0.161636	0.217658	0	0.0888426	0.130092	0.249079	0	0.411775	0.0278799	0.0995927	0.189395	0.126089	0.0538143
MSTRG.14643	0	0	0	0	0.381051	0	0	0	0	0.0786778	0	0	0	0	0.598727	0.158675	0	0
MSTRG.14862	0	0	0	1.14372	0.383236	0	0	0	0	0	0	0	0.249321	0	0	0	0	0
MSTRG.15044	0	0.10731	0.0401246	0	0	0	0	0.401024	0.190045	0.32945	0.253491	0	0.534655	0.0446938	0	0.813028	0.345473	0.800108
MSTRG.15276	0	0.117423	0	0	0	0.144563	0	0	0	0	0	0	0	0	0	0	0.0603817	0
MSTRG.15551	0	0	0	0	0	0	0	0	0	0	0	0	0	0	0	0	0	0
MSTRG.16541	0	0	0	0	0	0	0	0	0	0	0	0	0	0	0	0	0	0
MSTRG.17400	0	0	0	0	0	0.0902024	0.130351	0	0	0	0	0	0.0563878	0	0	0	0	0
MSTRG.17988	0	4.18168	0	0	0	0	0	0	0.393682	0	0	0.183141	0	0	0	0	0	0
MSTRG.18286	0	0.0653223	0.0243594	0	0.26497	0.0317322	0	0	0	0	0	0	0	0	0	0	0	0
MSTRG.18545	0	0	0	2.18334	0	1.19797	0	0	0	0	0	0	0	0	0	0	0	0
MSTRG.18979	0	0	0	0	0	0	0	0	0	0	0	0	0	0	0	0	0	0
MSTRG.20275	0	0.467841	0.11798	0	0	0	0	0	0	0	0	0	0	0	0	0.407036	0	0
MSTRG.20302	0.235489	0.35342	0.741646	0.582336	0.358296	0.427012	0.321019	0.419491	0.24919	0.181488	0.663028	0.235109	0.268763	0.292826	0.108555	0	0	0
MSTRG.20862	0	0	0	0	0	0	0	0	0	0	0	0	0	0	0	0	0.126519	0
MSTRG.21178	0	0	0	0.208953	0.342764	0.203649	0.229553	0	0.119291	0	0.136093	0	0.257472	0	0	0.32038	0	0.111773
MSTRG.21376	0	0	0	0	0.349015	0	0	0.0856204	0.253752	0	0	0.14357	0	0.190936	0.873144	0.537267	0.518955	0.376927
MSTRG.21939	0	0	0	0	0	0	0	0	0	0	0	0	0	0	0	0	0	0.814627
MSTRG.21976	0	0.111381	0	0	0	0	0	0.0811814	0	0	0	0	0	0	0.175836	0	0	0
MSTRG.22449	0	0	0.134099	3.12078	0	0	0	0	0	0	0	0	0	0	0.833009	0.650673	0	0
MSTRG.22620	0	0	0	0	0	0	0	0	0	0	0	0	0.364003	0	0	0	0	0
MSTRG.23019	0	0.994508	0	0	0.335419	0	0	0	0	0	0	0.256961	0	0	0	0	0	0
MSTRG.23513	0	0	0	0	0	0	0	0	0	0	0	0	0	0	0.15675	0	0	0
MSTRG.23859	0.0155328	0.113183	0.0983108	0.117021	0.0382632	0.108583	0	0	0.0168658	0.049495	0.0904761	0.0158788	0.0293966	0.015887	0.335734	0.0845859	0.0705985	0.426277
MSTRG.24267	0	0	0	0	0	0	0	0	0	0.0381336	0.0932226	0	0	0	0	0	0.0168537	0
MSTRG.24390	0	0	0	0	0	0	0	0	0	0	0	0	0	0	0	0	0	0
MSTRG.24924	0	0.213777	0	0	0	0.111478	0	0	0	0	0	0	0	0	0	0.132583	0	0
MSTRG.26099	0	0	0	0	0	0	0	0	0	0	0.279136	0	0	0	0	0	0	0
MSTRG.27472	0	0	0.0602964	0	0	0.184986	0	0	0	0	0	0	0	0	0	0	0	0
MSTRG.28241	0.0540177	0	0.0243896	0.0337745	0	0	0.213908	0	0.0873762	0	0.0222717	0.109747	0	0	0.342641	0	0	0.0528999
MSTRG.28993	0	0	0	0	0	0.982194	0	0	0	0	0	0	0.150697	0	0	0	0	0
MSTRG.29413	0	0	0	0	0	0	0	0	0	0	0	0	0	0	0	0	0	0.278718
MSTRG.29443	0	0	0.0482365	0	0.0653053	0	0	0.0479161	0	0	0	0.0536418	0.0491269	0	0	0.304064	0	0.106263
MSTRG.29653	0	0.0723236	0	0.984816	0.733205	0	0	0	0	0.0463929	0	0	0	0	0	0.172279	0.0947758	0
MSTRG.29869	0	1.21702	0	0	0	0	0	0	0	0	0	0	0	0	0	0	0	0
MSTRG.30111	0	0	0	0	0	0	0	0	0	0	0	0	0	0	0	0	0	0
MSTRG.30272	0.0894328	0	0	0	0	0	0	0	0	0	0	0	0	0	0.151802	0	0.265597	0.186103
MSTRG.30600	0	0	0	0	0	0	0.153247	0	0	0	0	0	0	0	0	0	0	0
MSTRG.30878	0	0.473599	0	0	0	0	0	0	0	0	0	0	0	0	0	0	0	0
MSTRG.32111	0.978194	0	0.0826111	2.56776	1.7692	0.049135	0	0.492905	0.426567	0.541718	0.0798277	0	0.560514	0	0	0.0577622	0.0638687	0
MSTRG.32229	0	0.467064	0.611613	0.361083	0.29597	0.290502	0.19623	0	0	0	0.0393239	0	0	0	0.889142	0	0.226542	0.0959528
MSTRG.34112	0	0.109314	0	0	0.11079	0	0	0	0	0	0	0	0	0	0	0	0	0
MSTRG.34288	0	0	0	0	0	0	0	0	0	0	0	0	0	0	0	0	0	0
MSTRG.34562	0	0	0	0	0	0	0	0	0	0	0	0	0	0	0	0	0.227944	0
MSTRG.34710	0.0252515	0.183527	0	0.47395	0.496308	0	0	0.0230966	0.027259	0.179687	0.104257	0.0770286	0.0474028	0.153991	0.365765	0.138948	0	0.0988339
MSTRG.34719	0	0	0	0	0	0	0.116359	0	0	0	0	0	0	0	0.316668	0.144506	0	0
MSTRG.35028	0	0	0	0	0	0	0	0	0	0	0	0	0	0	0	0	0	0
MSTRG.35307	0	0.243763	0	0.250057	0	0.387086	0	0	0	0.38307	0.479484	0	0.0905381	0	0	0	0	0.416475
MSTRG.35835	0	0	0	0.25893	0.258124	0.621872	0	0	0	0	0	0	0	0	0.424779	0	0	0
MSTRG.38976	0	0	0	0	0	0	0	0	0	0	0	0	0	0	0	0	0	0
MSTRG.40838	0	0.0410692	0.0874782	0	0.148746	0	0	0.155141	0.130758	0.275733	0	0	0.0227442	0.246239	0.306681	0.299412	0.184717	0.0947137
MSTRG.41421	0	0	0	0	0	0	0	0	0	0	0	0	0	0	0	0	0	0
MSTRG.43699	0	0.032362	0	0	0	0	0	0	0	0.0422149	0	0	0	0	0.0484298	0	0	0.10468
MSTRG.44274	0	1.11709	0	0	0.564198	0	0	0	0	0	0	0	0	0	0	0	0	0
MSTRG.50266	0	0.096921	0	0	0	0	0	0	0	0	0	0	0	0	0.757802	0	0	0
MSTRG.53636	0	0.803749	0	1.27713	2.03205	0	0	0.304544	0.657088	0	0	0	0	0	0.401801	0	0	0
MSTRG.4268	0	0	0	0	0	0	0	0	0.0387097	0	0	0.0364817	0	0	0.262924	0.0502352	0	0.141988
MSTRG.4377	0	2.16603	0.0615633	0	0	0	0	0	0	0	0	0	0	0	0	0	0	0.268201
MSTRG.6629	1.3102	0.834566	0.401279	0.58416	0.409528	0.208145	0.204213	0.366504	0.144096	0.193591	0.183813	0.180945	0.0626899	0.248767	0.321138	0.395836	0.236807	0.433964
MSTRG.7108	0	0	0	0	0	0	5.20747	0	0	0	0	0	0	0	0	0	0	0
MSTRG.8225	0	0.230381	0	0	0	0	0	0	0	0	0	0	0	0	0.640568	0	0	0.344995
MSTRG.9189	0	0	0	0	0.144517	0	0	0.343963	0	0	0.0296942	0	0	0	0	0	0	0
MSTRG.9372	0	0	0	0	0.304977	0.387163	0	0	0	0.175824	0	0	0.412031	0	0	0	0	0
MSTRG.9931	0	0	0	0	0	0	0	0	0	0	0	0	0	0	0	0	0	0
MSTRG.12405	0.209573	0	0	0	0	0	0	0	0	0.440187	0.458337	0	0.344735	0	0	0	0.362046	0.873076
MSTRG.13318	0	0.363139	0	3.47703	2.33073	0	0.14543	0	0	0	0.238183	0	0.0899518	0.197476	0	0	0	0
MSTRG.13346	0	0	0	0	0	0	0.551262	0	0	0	0	0	0	0	0.220316	0.356773	0.630335	0
MSTRG.13556	0	0	0	0	0	0	0	0	0	0.108667	0	0	0	0	0	0	0	0
MSTRG.13658	0	0	0	0	0	0	0	0	0	0	0	0	0.0634992	0.0693229	0	0	0	0
MSTRG.15330	0	0	0	0	0	0.109047	0	0	0	0	0	0	0	0	0	0	0.141585	0
MSTRG.15597	0	0	0	0	0	0	0	0	0	0	0	0	0	0	0	0	0	0
MSTRG.15774	0	0	0	0	0	0	0	0	0.203836	0.14923	0	0.147245	0.270986	0	0.0663488	0.202867	0.0561476	0
MSTRG.17816	0	0	0	0	0	0	0	0	0	0	0	0	0	0	0	0	0	0
MSTRG.17928	0	0	0	0	0	0	0	0	0	0	0.0764125	0	0	0	0	0	0.47625	0
MSTRG.18243	0.0179373	0.172191	0	0	0	0.187969	0	0.101241	0.0695654	0	0.150092	0	0.0520065	0.0869779	0.0767031	0	0	0
MSTRG.18914	0	0	0	0.0700064	0.0689041	0	0	0	0	0	0	0	0	0	0	0	0	0
MSTRG.20757	0.0202702	0.0245863	0	0.105854	0.0748026	0	0	0	0.0438943	0.273554	0	0	0.191052	0	0.512449	0.222499	0.290234	0.197879
MSTRG.21649	0.185606	0	0	0	0	0	0	0	0	0	0.217062	0	0	0	0	0	0	0
MSTRG.22099	0	0	0	0	0	0	0	0	0	0	0	0	0	0	0	0	0	0
MSTRG.22839	0	0	0	0.18736	0	0.408135	0	0	0.070607	0.205421	0	0.266574	0.060812	0.0663526	0	0	0	0
MSTRG.26385	0	0	0.390745	0	0	3.63896	0	0	0	0	0	0	0	0	0	0	0	0
MSTRG.26849	0.133268	0	0	0.164328	0.161873	0	0	0	0	0	0	0	0	0	0	0	0	0
MSTRG.26930	0	0	0	0	0	0	0	0	0	0	0	0	0	0.817281	0	0	0	0
MSTRG.27710	0	0	0	0	0	0	0	0	0	0	0	0	0	0	0	0	0	0
MSTRG.28205	0.131099	0.35477	2.52464	0.432012	0	0	0.482812	0.0975477	0	0	0.189961	0	0.131184	0	0.132878	0.390637	0.279081	0.118197
MSTRG.28431	0	0	0	0.106741	0	0	0	0	0.0615577	0.045173	0	0.0434632	0	0	0.280377	0.0962564	0.0642927	0.165418
MSTRG.28929	2.57252	0.326446	1.00007	0	5.73618	0.0901726	0.119843	0.353189	0.296424	0.536261	0.781816	0.267124	0.4828	0.354018	0.132096	0.417668	0.097718	0.159826
MSTRG.30654	0.341858	0	0	1.0409	1.48794	0	0.70969	0.502833	0.332246	0.222657	0	0	0	0	0	0.428764	0	0
MSTRG.31864	0	0	0	0	0	0.0230971	0.0258885	0	0.0884731	0	0	0	0	0	0.048551	0	0.0402485	0
MSTRG.34658	0.471793	0	0	0.590321	0.677754	0	0.203426	0	0	0	0	0	0	0	0.332916	0.227923	0	0
MSTRG.35465	0	0.0576213	0	0	0	0	0	0	0	0	0	0	0	0	0.526254	0	0.148952	0.0946563
MSTRG.35502	12.2429	12.6838	0.0863248	0	0	0	0.422894	0.49313	0	0.0250798	0	0	0	0	0	0	0	0.0625892
MSTRG.35597	0	0	0	0	0	0	0	0	0	0	0	0	0	0	0	0	0	0
MSTRG.36456	0	0	0	0	0	0	0	0	0	0	0	0	0	0	0	0	0	0
MSTRG.37393	0	0	0	0	0	0	0	0	0	0	0	0	0	0	0	0	0	0
MSTRG.37946	0	0.34969	0	0.160985	0.1389	0	0	0	0	0	0.164456	0	0	0	0.27338	0	0.0932368	0.125468
MSTRG.38361	0	0	0	0	0	0	0	0	0	0	0	0	0	0	0	0	0	0
MSTRG.40767	0	0	0.0158863	0	0	0.184591	0.0229815	0	0.0381788	0.0209999	0	0.0629096	0.0415692	0	0	0	0	0
MSTRG.40925	0	0.067878	0	0	0	0	0	0	0	0	0	0	0	0.0562896	0	0	0	0
MSTRG.43275	0	0	0	0	0	0	0	0	0	0	0	0	0	0	0.317947	0.26048	0	0.681213
MSTRG.48025	0	0	0	0	0	0.119186	0	0	0	0	0	0	0	0	0.17947	0	0	0
MSTRG.48295	0	0	0	0	0.49079	0	0	0	0	0	0	0.0669421	0	0	0.249558	0	0	0
MSTRG.48631	0	0	0	0	0	0.37138	0	0.066538	0.237913	0.403207	0.525941	0.299533	0.204521	0	0	0.20978	0	0.60686
MSTRG.10183	0	0	0	0	0	0	0	0	0	0	0.226067	0	0	0	0	0	0	0
MSTRG.10295	0.10961	1.40251	0	0.870366	0	0	0.20283	0	0	0	0	0.406492	0	0	0	0	0.733534	0
MSTRG.10373	33.3441	68.5878	53.6107	10.2468	12.3398	34.772	10.6305	31.6743	22.593	41.4396	28.5926	6.84962	37.567	9.55938	23.4854	22.9428	41.8466	20.2006
MSTRG.1046	0	0	0	0.0842014	0	0	0.261147	0	0.495575	0.278721	0	0	0	0	0.970357	0	0.0547298	0
MSTRG.10606	0	0	0.0563373	0	0	0	0	0	0	0	0	0	0	0	0.645766	0	0	0
MSTRG.10607	0	0	0	0	0	0	0.448269	0	0	0.553621	0	0	0	0	0	0	0	0
MSTRG.10665	0	0	0	0	0	0	0	0	0	0.523624	0	0	0.599761	0	0	0	1.63867	1.8165
MSTRG.10673	0	0	0	0	0	0	0	0	0	0	0	0	0	0	0	0	0	0
MSTRG.10690	0	0	0	0	0	0	0	0	0.825475	0.565444	0	0	0	0	3.78215	0	1.78971	2.95829
MSTRG.10784	0	0	0	0	0	0	0	0	0	0	0	0	0	0	0	0	0	0
MSTRG.10934	0	0	0	0	0	0	0	0	0	0	0	0	0	0	0	0	0	0
MSTRG.1095	0.581002	2.14456	0.135054	0.286555	1.51466	4.31814	0.990193	1.15197	1.10686	0	0	0.61184	0.970931	1.01765	2.13787	0.526713	1.42668	0.479276
MSTRG.10977	1.03038	4.13208	10.0165	0	0	7.53583	2.91723	2.94863	4.51224	5.88519	2.15622	1.35409	3.93681	6.3164	2.17355	4.652	3.57824	0
MSTRG.10979	0	0	0	0	0	0	0	0	0	0	0	0	0	0	0	0	0	0
MSTRG.10999	0	0	0	0.10367	0.174931	0	1.46617	0.156693	0	0.474327	0.176867	0.043746	0.763339	0	0.238356	1.40228	2.08866	0
MSTRG.11048	0	0	0	0.0893547	0.267301	0	0	0	0	0	0	0	0	0	0.76215	0.248032	0	0.166731
MSTRG.11243	0	0	0	0	0	0	0	0	0	0	0	0	0	0	0.865889	0	0	0
MSTRG.11261	0	0	0	0	0	0	0	0	0	0	0	0	0	0	0	0	0	0
MSTRG.1147	0	0	0	0	0	0	0	0	0	0	0	0	0	0	0	0	0	0
MSTRG.11531	0	0	0.15549	0.170344	0	1.98873	0	0.77855	2.27629	1.15707	5.22745	3.61275	0.341285	0	0.503179	3.44821	1.53338	0.540067
MSTRG.11549	0	0	0	0	0	0	0	0.585724	0	0	0	0	0	0	0	0	0	0
MSTRG.1159	0	0	0	0.420311	0	0	0	0	0	0	0	0.299317	0	0.456106	0	0	0	0
MSTRG.11686	0.039829	0	0	0.378928	0	0	0	0.180048	0.0852461	0.591681	0.260122	0	0	0.040104	0	0	0	0
MSTRG.1182	0	0	0	0	0	0	0	0	0.248932	0.119785	0	0.158504	0.282093	0	0.32296	0	0	0
MSTRG.11838	0	4.38891	0	0	0	0	0	0	0	0	0	0	0	0	0	0	0	0
MSTRG.11943	0.224719	0	0.552723	0	0	12.0789	0.837509	0.998275	2.05234	4.73251	2.3885	0.78616	1.33195	0.76221	3.5386	0.790156	5.66786	1.87239
MSTRG.12064	0	0	1.74059	0	0	1.68959	0	0	0	0.388505	1.21725	1.07951	0.448014	1.03925	1.24766	0	0	0
MSTRG.12171	3.76375	1.1011	0.911079	1.17511	0.682668	0	1.52443	0.787847	0.678171	3.08508	0.918528	0	1.18405	2.23116	0	0	0	0.507149
MSTRG.12173	4.20779	2.1496	3.62355	3.531	0.692693	0	0	8.59252	0	20.2784	6.37925	0	17.5984	3.71799	7.05719	4.11479	5.3748	0
MSTRG.1227	60.1018	7.93742	41.8297	1.8656	9.26616	0.425184	0	5.39772	2.76514	4.02988	0	0	0	7.02733	0	2.58332	11.2753	0
MSTRG.12339	0	0	0	0	0	0	0	0	0	0	0	0	0	0	0.326818	0.536569	0.287226	0
MSTRG.12441	0	0.0686798	0	0	0	0	0	0	0	0	0	0	0	0	0	0	0	0
MSTRG.1248	0.405926	0.180174	1.42683	2.56088	1.31938	7.25451	0.963136	0	0	0.142582	0.148476	0	0.335114	0.373605	2.76587	0.987193	1.7488	0.422412
MSTRG.12480	0	0	3.13042	0	0.888089	0.299972	0	0	0	0.346518	0	0.464729	0	0	0	0	0	0
MSTRG.12543	0	0	0.308266	0	2.5029	0.473179	1.40546	2.64755	1.06225	12.2411	2.79181	3.45669	1.57974	1.67999	0.498467	0	0.433869	0.535047
MSTRG.12563	0.0469517	0.0841727	1.24396	0.141637	0.220034	1.62304	0	0.387157	0.120995	1.18107	1.06218	0.52499	0.629229	0.625	1.30905	1.7236	0	0
MSTRG.1257	1.45363	1.25681	0	0	0	0	0	0	1.13403	0	0.410118	0.550837	0	0	0	0	0	0
MSTRG.12584	1.97083	0.822856	2.09529	2.22603	1.41546	5.03203	7.32045	0	4.25011	0	0	0	0	5.37047	0	0	0	0
MSTRG.12663	8.92836	9.0279	17.715	17.9615	14.4298	0.148853	0.104174	0.142564	0.128612	0	0.0794956	0.166515	0	0	0	7.21654	7.84549	7.71087
MSTRG.12744	0.0855519	0	5.19931	0.922336	0.305236	29.7646	1.40773	0	2.76012	5.09852	2.78465	0	0.842977	2.41276	2.20634	1.26706	0	0
MSTRG.1289	0	0	0	0	0	0	0	0	0	0	0	0	0	0	0	0	0	0
MSTRG.1290	0	0	0	0	0	0	0	0	0	0	0	0	0	0	0	0	0	0
MSTRG.13203	0	0.34982	0	0	0.705596	0.325816	0.267964	0.108896	0.195355	0.166261	0	0	0	0.0916833	0.177031	0	0	0
MSTRG.1321	10.112	46.782	6.6146	10.642	11.0344	1.43304	0	2.1332	0	0	3.36348	3.9206	2.26578	4.14476	4.6279	5.76216	14.6078	6.67778
MSTRG.13232	0	0	0	0.149911	0	0	0	0	0	0	0	0	0	0	0	0	0	0
MSTRG.13255	1.15369	0.0844513	0	1.04714	1.25371	0.383824	0	0	0	0	0	0.363511	0	0.822154	0	0	0.619409	0
MSTRG.13270	0	0	0	0	0	0	0	0	0	0	0	0	0	0	0	0	0	0
MSTRG.13306	0.29349	0	0	0.978735	0.592152	2.93145	0	0.583491	0.851714	4.83236	0.975954	0.658047	2.33378	0.613648	2.68666	1.95979	4.35225	0.720957
MSTRG.13398	0	0	0	0.0640475	0.216909	0	0.120643	0.620698	0.928331	2.69074	2.21339	0.415113	1.25534	0.638954	1.13704	2.28581	3.28273	1.11081
MSTRG.13420	0	0	0.139324	0	0	0.0717453	0	0	0.0614142	0	0.0466949	0	0	0	0.320733	0.165425	0	0.115299
MSTRG.13490	0	0	7.09412	0.367963	0	0	0	1.41561	0	0	1.37716	2.65566	0	2.26181	6.1572	9.36905	0.744753	3.02976
MSTRG.13496	0	0.819717	1.70417	0.461631	0.113949	0	0	0.633677	0.927002	0	0	0	0	0	0	1.24378	1.31219	0.218082
MSTRG.13497	0	0	0	0	0	0	0	0	0	0	0	0	0	0	0	0	0	0
MSTRG.13500	1.19333	1.86181	0.175576	1.37499	0.562728	4.48446	2.40109	9.15305	5.11177	3.73495	4.05229	2.13668	7.25585	4.36484	1.71951	1.28188	1.75462	0.30728
MSTRG.13685	0	0	0	0	0	0	0	0	0	0	0	0	0	0	1.21275	0	0	0
MSTRG.13833	8.06754	0.915613	5.5269	0	1.98585	3.0004	2.4495	4.04744	3.5524	3.82903	2.52298	2.19359	4.63921	0	7.32139	28.1339	14.6501	9.66303
MSTRG.13913	31.1272	7.30265	96.4394	10.9779	24.4015	34.719	27.3413	27.4668	15.4597	16.6583	3.64552	6.69929	14.4318	9.78518	28.1748	12.5281	0	0
MSTRG.14164	96.1942	7936.89	0	0	0	0	0	0.270648	0.151715	0.263868	0	0.91654	0.504861	0.124348	0.315495	0	0	0.338003
MSTRG.14283	0	0.0911756	0	0.0296436	0.0332536	0	0	0	0.0544868	0.0598615	0.041679	0	0	0.0256506	0.228469	0	0	0
MSTRG.14569	42.1881	400.317	27.4018	90.7996	111.185	28.3537	43.9794	37.1932	58.3165	61.4514	78.064	66.5103	59.2788	28.3744	5.81404	10.6493	6.35979	4.67486
MSTRG.1463	0.707124	1.18623	0.552444	3.44974	0	0	1.11841	0	0	0	0.765652	0.871963	0.382262	0	5.07329	3.11147	0	0.984508
MSTRG.14683	0.157833	0	0.673843	0	0.146532	1.41528	1.10735	0.320711	0.330316	0	0	0	0	0.183636	0.20112	0	0	0
MSTRG.14772	0	0.0492626	0	0.673141	0	0.391154	3.02607	0	0	0	0.0441609	0	0	0	0	0.155484	0	0
MSTRG.14860	0.0529001	0	0	0.0311005	0.0697885	2.8939	0.649618	0.145018	0.827438	1.23272	1.26559	0.376281	0.595239	0.214901	0.239608	0.327895	0.283047	0.155375
MSTRG.15136	0	0	0	0.438277	0	2.55322	1.34849	0	0.738368	1.20665	0.953361	0	1.07337	2.14772	0	0	0	2.03954
MSTRG.15225	106.277	2053.44	16.1218	376.339	789.391	0	0	0	0	3.39803	1.859	0	0.111884	0	0.184115	0	67.4854	17.8954
MSTRG.15295	0	0.408377	3.46066	0.984903	0	2.28771	0	0.343491	13.1381	7.98816	20.3302	50.7543	25.0574	0	1.83304	3.28499	0.840129	1.93881
MSTRG.15571	230.546	30.4274	0	164.883	388.826	0.690527	0	17.4173	4.71477	19.9985	61.4971	0	28.2065	14.4749	0	0	0	0
MSTRG.15584	0.0875052	0	0	0.285978	0.244537	2.66019	0.734144	0.094182	0.19693	0	0	0	0.441975	0.328373	0.13128	0.0656693	0.20748	0.255588
MSTRG.15621	0	0	0	0	0	0	0	0	0	0	0	0	0	0	0	0	0	0
MSTRG.15706	5.68563	1.11083	2.94547	2.34064	0.590949	1.44664	8.45734	0.445089	2.66603	0.479566	1.93057	0.403306	0.764801	0	0.585341	1.85921	0	0.209781
MSTRG.15759	0.0316626	0	0.128346	0.183686	0.109656	0.0663796	0	0.058611	0	0	0	0	0	0.0541497	0	0	0	0
MSTRG.15767	0	0	0	0	0	0	0	0	0	0	0	0	0	0	1.00033	0	0.879803	0
MSTRG.1581	0	0	0	0.623758	0.481886	0	1.9755	0	0.5351	1.00897	0	0.656653	1.13394	1.07379	0	0.81622	0.649087	0.279472
MSTRG.1582	0	0	0	0	0	0.361972	0.311222	0	0	0	0	0	0	0	0	0	0	0
MSTRG.15915	0	0.0242172	0	0.215763	0.17071	0.89443	1.03815	0.298393	0	0	0.201444	0	0	0.26142	0.226505	0	0	0.173622
MSTRG.16096	0.153983	0.0202577	0.157683	0.0717054	0.0854492	0.197091	0.098415	0.022619	0	0	0.116874	0.0229206	0.0471419	0.0235604	0.362909	0.140559	0.13175	0.101192
MSTRG.1615	0	0	0	0	0	0.590502	0	0.312162	0	0	0	0	0	0	0	0	0	0
MSTRG.16154	0	0	0	0	0	0	0	0	0	0	0	0	0	0	0	0	0	0
MSTRG.1623	0	0.915034	0	0	0.7044	0	0	0.18001	1.06178	0.0779776	1.6267	0.203947	0.0921393	0.158493	0	1.17819	0.341397	0.212403
MSTRG.1625	0.0826149	0	0.0645158	0.0781468	0.0896928	4.90376	2.21044	0.0792811	0.11358	0	0.499017	0.151135	0	0.0780573	0.234046	0	0	0
MSTRG.16647	0.416961	0.205037	0	0.683816	0.303107	0	0	0.56646	0.436872	0	0.183015	0.20392	0	0.90059	0	0	0.695271	0.247582
MSTRG.16990	0	0	0.796133	0.70046	0.800452	1.87661	0	0	0	0.0985908	0.102783	0	0	0	0	0	0	0
MSTRG.17027	0	0	0.216396	0	0	0	0	0	0.0943877	0	0	0	0	0	0	0	0	0.183425
MSTRG.17032	0	0	2.97949	0.520323	1.00715	0	0	0	0	0	0	0	0	0	0	0	0	0
MSTRG.17049	0.0299286	0	0.0724172	0.0352942	0.0396205	0.22432	0.183588	0	0.0644353	0	0	0.0303541	0.11193	0	0.271628	0.372414	0	0.0586994
MSTRG.17188	6.22882	2.0888	1.77184	0	0.387171	1.32752	0.472172	0	1.73062	0.808697	3.43648	1.00331	1.63064	4.98359	12.0742	7.08282	6.50023	10.8209
MSTRG.17261	0	0	12.7523	0	0	34.0877	6.36518	0	2.58061	1.76581	2.48275	0.832438	2.0173	1.58931	25.6842	52.9155	37.4753	0
MSTRG.17366	5.33324	1.49547	1.94015	1.94511	3.05215	6.01727	6.83507	1.26907	0.659889	0	0.310063	0.709106	0.192221	0.995001	2.2303	0.443046	1.09583	0.806778
MSTRG.17403	0.144233	0	0	0.123863	0	0	0	0	0.113653	0.0887754	0	0.071373	0	0	0	0.290191	0.0402601	0
MSTRG.1742	0	0	54.5796	11.0603	11.1828	0.498309	0	0	0	0	0	0	0.137982	0	0.55038	0.146064	0	0.499192
MSTRG.1756	0	0.0563085	0.466613	0.835169	0.171338	2.70562	1.82696	0.277988	0	0.433012	0.45195	0.18713	0.455895	0.18639	3.36805	2.24311	0.207992	1.49648
MSTRG.17578	0	0	0	0	0	0	0	0	0	0	0	0	0	0	0	0	0	0
MSTRG.17615	0	0	5.69469	0	12.271	31.7529	13.2903	0	0.825475	2.82722	1.19112	3.19345	0	1.52537	11.3464	9.01347	5.36913	3.94439
MSTRG.17638	0	0.292614	0	0	0	0	0	0.142668	0	0.388862	0	0	0	0	0.152153	0	0	0
MSTRG.17727	0.0261566	0	2.57172	1.67366	2.44723	18.3967	5.5081	0.924312	5.21196	0.59924	3.98739	1.81288	4.83165	3.31313	8.01659	5.88906	4.10772	0.789142
MSTRG.17903	5.74093	0.665249	35.6652	4.89956	7.08007	0	0	0	0	0	0	0	0	0	23.73	48.3764	13.3432	19.1455
MSTRG.17949	0	0	0	1.87733	1.86796	0	0	0	0	0	0	0	0.59198	0	1.80666	1.17427	0.29185	0.23868
MSTRG.17958	0.461545	2.605	0.180971	6.51581	13.0789	0	0.366633	0	0	0	0	0	0	0	0.296008	0	0	0
MSTRG.1815	0	0	0	0	0	0	0	0	0	0	0	0	0	0	0.17584	0	0	0
MSTRG.18190	0	0	0	0	0	0	0.298211	0	0	0	0	0	0	0	0	0	0	0
MSTRG.1821	0.0344335	0.0310684	0.124827	0	0.13737	0	0	0	0	0	0.0846876	0.139348	0.0641487	0.104374	0.877165	0.382725	0.264952	1.01518
MSTRG.18217	0	0	0	0	0	0	0	0	0	0	0	0	0	0	0	0	0	0
MSTRG.18499	0	0	0.14586	0.125408	0	0.513001	0	0.232025	0.347632	0.0761908	0.131932	0.511502	0.0745165	0.0495487	0	0.329378	0.152559	0.0391701
MSTRG.18557	0	0	0	0	0	0	0	0	0.0932789	0	0	0	0	0	0	0	0	0
MSTRG.18558	0	0	0	0	0	0.169936	0	0	0.285417	0	0	0	0	0	0	0	0	0
MSTRG.18860	0	4.92465	0	0	0	0	0	0	0	0	0	0	0	4.94759	12.9431	21.3488	12.5378	5.84854
MSTRG.18935	0	0	0.769958	0.649793	0.631473	0	0	0.240655	0.383631	0	0.507362	0.0906323	0.3286	0.180058	0.173493	0.273834	0	0.56
MSTRG.19244	0	0	0	0	0	0	0	0	0	3.29368	0	0	1.76511	4.00786	0	0	0	0
MSTRG.19457	0.0444508	0	0	0	0	0	0.132859	0	0.0340903	0.212355	0	0	0	0.0557265	0.232577	0.136602	0.121401	0
MSTRG.1946	0	0	0	0	0	0	0.207509	0	0	0	0	0	0	0.285688	0.846357	0.815612	1.56932	0.40848
MSTRG.1949	0	0	0	0	0	1.66253	1.71684	0	0	0	0	0	0	0	0	0	0	0
MSTRG.19914	0	0	0.174669	0	0	8.3539	13.2643	0	0	0	0	0	0	0	0	0	0	0
MSTRG.19916	0	0	0	0	0	0	0	0	0	0	0	0	0	0	0	0	0	0
MSTRG.20121	0	0	0	0.141331	0	0	0.284739	0	0	0	0	0	0.0534082	0	0	0	0	0
MSTRG.20123	0	0	0	0	0	2.17745	0	0	1.22339	4.64947	0.577644	0	1.66708	2.36561	0	4.57388	0	0
MSTRG.20397	0	0	0	0	0	0	0	0	0	1.4909	0.606889	0	0	0.296304	0.28863	2.11362	1.4847	0
MSTRG.20460	5.19377	2.58215	1.63998	0	1.09554	7.75157	3.27911	0	0	0	0	0	0	0	2.10862	2.04112	2.62667	0
MSTRG.20624	0	0	0	1.37317	0	0	0	0	0	0	0	0	0	0	0	0	0	0
MSTRG.20630	0	0	0	0.69139	0	0	0	0	0	0	0	0	0	0	0	0	0.756606	0
MSTRG.20631	0.266601	0.258888	1.64733	0.69139	0.986537	0	0	0	0	0	0	0	0	0	2.95955	1.90551	1.4321	2.33839
MSTRG.20632	0	0	0	0	0	0	0	0	0	0	0	0	0	0	4.28763	0	0	2.11038
MSTRG.20813	0	0	0	0	0	0	0	0	0	0	0	0	0.179516	0	0.191776	0	0	0
MSTRG.2088	0	0	0	0	0	0	0	0.865069	0	0	0	0	0.854728	0	0	0	0	0
MSTRG.21000	0.0833574	0	0.67802	0	0.100599	0	0	0	1.09853	0.764338	0.378124	0.203274	0.620826	0.626666	0.55288	0.289404	0.255147	0.0544416
MSTRG.21172	0	0	0	0	0	0	0	0	0	0	0	0	0	0	0	0	0	0
MSTRG.21174	0.139464	0.0767589	0	0.26555	0	0	0	0	0	0	0	0.219628	0	0	0.10115	0.346319	0.21346	0
MSTRG.21195	0.721118	0	3.89484	0	1.06292	1.56234	0.219363	0.695148	0.681482	3.97926	1.64206	0.682614	1.37281	1.49334	1.55232	1.45274	0.686962	0.717379
MSTRG.21260	0	0	0	0	0	0.179966	0	0.71339	0.301641	0.91915	0.33873	0	1.38394	0.423729	0	0	0	0.308364
MSTRG.21311	0	0	0	0	0	0	0	0	0	0	0	0	0	0	0	0	0	0
MSTRG.21478	0.409126	0	0	0	0	0	0.501102	0	0	0	0	0	0	0	0	0	0	0
MSTRG.21486	0	0	0	0	0	0	0	0	0	0.430529	0	0.399467	0	0.295441	0	0.781119	0	0
MSTRG.215	0	0	0	0	0	0	0	0	0	0	0	0	0	0	0	0.0787121	0	0.359074
MSTRG.21504	0	0.026617	0.0357555	0.051407	0.0959613	2.90298	0.543947	0.407283	0.383725	0	0	0.150522	0.0672682	0.0714037	0.238481	0	0.0668485	0.11464
MSTRG.21506	0	0	0.0437359	0	0.0235729	0.248646	0.0221778	0.0331532	0.156283	0	0.0149638	0.0919717	0.238206	0.0735977	0.324978	0.0491906	0.0273542	0.0702838
MSTRG.21651	0.0671487	0	0.038576	0.118098	0.184645	0	0	0	0	0	0	0.0667427	0.0230646	0	0	0	0	0
MSTRG.21856	0	0	0	0	0	0	0	0	0	0	0	0	0.0614982	0	0	0.248171	0	0.129518
MSTRG.21875	0	0	0.0566968	0.112665	0	0.64295	1.03473	0.211595	0.150488	0.878525	0.152864	0.283806	0	0.283094	0.429835	0.132634	0.366091	0.0930841
MSTRG.2199	0.132419	0.195967	0.113503	0.063829	0	0.155167	0	0	0	0	0.29077	0.0563849	0	0	0.22944	0.308487	0.207466	0
MSTRG.2200	0.0902496	0	0	0.0507821	0	0.45409	0.131579	0	0	0	0.451139	0	0	0.149866	0.18167	0.164223	0	0
MSTRG.22217	0.254671	0.199183	0	0	0.626748	0	0.172539	0	0	0	0.489373	0.103002	0	0	0.772566	0.293862	0.676741	0.234693
MSTRG.2224	0	0	0	0	0	0	0	0	0	0	0	0	0	0	2.95494	0	0	0.71645
MSTRG.22749	12.8129	25.8483	5.55378	14.2171	20.7732	0	0	5.2949	4.55916	0	8.10163	1.70286	0	4.2502	2.32175	2.99156	3.1962	1.66883
MSTRG.22861	0.679644	0	4.74055	6.11218	10.4641	5.4913	0.954968	0.957886	1.77288	0	3.41612	1.70648	0	1.64101	64.8224	77.2496	41.7834	12.4853
MSTRG.22944	0	0	0	0.0807138	0	0	0	0	0	0	0	0	0	0	0	0	0	0
MSTRG.2299	0	0.402685	0	0	0	0.177954	0	0	0	0	0	0.127881	0.368392	0.547021	0	0.297671	0	0
MSTRG.23077	5.70954	0	0	0	0	1.20217	1.21008	0	0	0.222666	0.694847	0	0	0	0	3.45453	5.3839	0
MSTRG.23116	0	0	0	0	0	0	0	0	0	0	0	0	0	0	0	0	0	0
MSTRG.2313	0	0	0	0	0	0.0492235	0	0	0	0	0	0	0	0	0	0	0	0
MSTRG.23236	0	0	0.390624	0	0.223106	7.37104	2.23131	0.738744	0.79107	0	0	0	0	0	1.19415	0.514777	0.496827	0.442703
MSTRG.23460	0	0	0	0	1.0287	0	1.58546	0	0.925623	0	0.497027	0.473846	2.38973	0.935402	0	0	0	0
MSTRG.23505	0	0.0225469	0.0927551	0.0574767	0	0	0	0	0	0	0	0	0.0728192	0	0.329118	0.146346	0	0.117505
MSTRG.23580	0	0	0	0	0	0	0	0	0	2.42791	0	0	0	0	0	0	0	0
MSTRG.23599	0.157998	0	1.46711	0.115906	0.12974	0	0	2.30676	0	0	0	0	0	2.97744	2.86844	2.20347	0.987601	0.20883
MSTRG.23652	0.0372677	0	0.585003	0	0.0994003	0.15025	0.22815	0.236337	0.2796	0	0	0	0.450233	0.244051	0	0	0	0
MSTRG.23655	0	0	0	0.238002	0.19874	0.124702	0.104656	0.100289	0	0	0	0	0	0	0	0.212862	0	0
MSTRG.2377	0	0	0.163624	0	0	0	0	0.0603975	0	0.104549	0	0	0.185688	0	0.25322	0	0	0
MSTRG.23771	0	0	0	0.57668	0	0	1.25069	2.4917	0.672709	0	0	0.726527	0	0	0.347759	0	0	0.18708
MSTRG.23989	0	0	0	0	0	0	0	0	0	0	0	0	0	0	0	0	0	0
MSTRG.2420	0	0	0	0	0	0	0	0	0	0	0	0	0	0.108256	0	0	0	0
MSTRG.24681	0	0	5.23973	0	0	4.03846	0	0	0	0	0	0	0	0	0	0	0	0
MSTRG.24858	0	0	11.282	0	0	0	4.38147	0	2.12278	1.08365	3.06828	0.515085	3.69751	1.9599	4.92921	4.79364	5.51492	7.65851
MSTRG.24982	0	0	0.50525	0	0.802101	1.77099	0.893902	0.34962	0.344304	0	0	0	0	0	0	0.638623	0	0
MSTRG.25077	0	0	0	0	0	0.885683	0	0	0	0.400295	0	0	1.38389	0.535749	0	0	0	0
MSTRG.25204	0	0	0	0	0.0588827	0.184389	0.170427	0	0.291253	0	0	0.230239	0.0591302	0.521892	0	0	0	0
MSTRG.25748	0	0	0	0	0	33.3747	27.5801	0.765162	6.56402	10.2438	0	0.90856	3.65034	2.59807	49.7803	27.756	0	0
MSTRG.25824	0	0	0	0	0	0	0.601502	0	0	0	0	0	0	0	0.497894	0	0	0
MSTRG.25843	0	0	0	0	0	7.5375	0	0	0	0	0	0	0	0	0	0	0	0
MSTRG.25956	0	0	0.41754	0	0.278964	0	0.422862	0	0.177044	0.25338	0.395941	0	0	0.331244	4.13499	0	0	0
MSTRG.2635	0	0	0	0	0	0	0	0	0	0	0	0	0	0	0	0	0	0
MSTRG.26418	0	0.0297535	0.71094	0.18694	0.305803	1.02888	0.304574	0	0	0	0.106586	0.0333838	0	0.11027	0.383511	0.584472	0.266207	0
MSTRG.26426	1.71144	0.643721	2.36206	0.842433	0.851757	0	0	1.06996	1.575	1.49584	0.676761	0.661817	0	0.614417	0.755732	1.5077	0.631321	0.465628
MSTRG.26905	0.332115	0.117437	0.791508	0.475383	0.718758	0	0.372543	0.196421	0	0.33101	0.466158	0.264334	0.253209	0.467543	0.649047	0.465469	3.59264	0
MSTRG.26945	0	2.95117	0	3.80225	0	0	4.13278	0	0	0	0	0	0	2.83869	0	0	0	0
MSTRG.26953	134.362	27.0153	132.379	54.6095	59.5017	61.0267	78.6967	75.8837	108.285	129.768	93.306	180.894	168.188	140.574	32.8823	99.9605	69.7722	41.4005
MSTRG.27003	0.60537	0	0.461916	0.310809	0.18774	0	1.03448	1.13709	0	1.35672	2.61647	0.725003	1.92908	0.907975	0.752252	1.02384	0.770875	0.290704
MSTRG.27077	0	1.14244	0	0	0	0	0	1.29056	0	0	0	0	0.323282	0.739046	0	0	0	0
MSTRG.27078	0	0	0	0	0	0	0	0.454414	0	1.07326	0.684456	0	0	0	0	0	0	0
MSTRG.27121	1.37548	0.720967	1.3957	0	0	3.22917	2.26322	0.639821	0.261142	0.739732	1.34691	0.994699	0	0	3.73833	0	4.30647	0
MSTRG.27171	0	0	0	0.0332103	0	0	0	0	0	0	0	0	0	0	0.0934234	0	0.0762214	0
MSTRG.27368	0	0	0.30842	0	0.0422894	0.716394	0.109771	0	0.0342809	0.0250798	0	0	0.0595218	0.0645334	0	0	0.0979208	0
MSTRG.27426	30.0476	20.6098	10.9747	5.07675	5.85535	29.2605	24.9781	12.3424	11.4884	9.87791	9.26737	4.62326	14.3335	11.0751	3.57772	1.23778	3.88674	0.148237
MSTRG.27644	0.0862583	0	0.147133	0.150244	0.319142	0	0	0	#N/A	0	0	0	#N/A	#N/A	0.25928	0	0	0.105657
MSTRG.27690	1.52822	0.269646	5.41259	0	3.5372	3.27205	5.11032	0	1.54792	0.205002	0	1.10737	1.9167	2.48193	20.7336	5.19012	0	0
MSTRG.27711	0	0	0	0	0	0.614593	0	0	0	0	0	0	0	0	0	0	0	0
MSTRG.27712	0	0.539292	0	0	0	1.45424	0	0.236598	0	0	0	0	0	0	0	0	0	0
MSTRG.27859	1.04976	0	17.0031	0	0	45.4503	50.9214	2.10201	6.73826	3.92403	1.24138	0.832438	1.34486	1.58931	0	0	1.87376	2.05828
MSTRG.2848	0	0	0	0	12.5338	41.7156	0	0	1.0788	0	0	0	0	0	0	0	0	0
MSTRG.28507	0.320094	0.141097	0.884087	0	0	2.23483	1.66069	0	0.302758	2.18823	0.777245	0.649796	3.62346	1.12773	1.26078	0	0.853079	0
MSTRG.28692	3.22411	2.133	6.84909	10.0624	10.52	0	0	7.06023	0	0	0	0	0	8.48759	13.4272	43.5344	25.9584	2.39986
MSTRG.28782	3.27994	0.493702	4.34106	0.0610819	0.412754	0.443845	0.622212	2.38507	0	1.68081	0	0	0.65255	0	1.19827	1.901	1.32054	0.403138
MSTRG.28928	0	0	0.312196	0	0	0	0	0	0	0	0	0	0	0	0.503031	0	0.940315	0
MSTRG.2928	0	0	0.465068	0	0	0.71592	0	0.676522	0.20241	0	0.916949	0.382648	0.379337	0	0.453207	1.6032	0.79375	0.198026
MSTRG.29391	0	0	0	0	0	0.430282	0.161339	0	0.103889	0.128914	0	0	0.0870806	0	0.1395	0	0	0
MSTRG.29426	0.404921	0.120489	0.524992	0.0309656	0.234855	4.67773	0	0.237042	0.534695	0.734007	0.527789	0.232297	1.11211	0.435	0.620301	2.16522	1.31121	0.534799
MSTRG.29517	0	0	0	0	0	0	0	0	0	0	0	0	0	0	0	0	0	0
MSTRG.29526	0	0	0	0	0	8.23817	1.48092	0	0	1.2772	0	0	1.75645	0	3.38378	1.59851	0	0
MSTRG.2955	0	1.58339	0.58778	0.292314	0.922769	8.83799	4.54953	0.562412	0.592724	0.492429	0.772417	0.335073	0.561271	0.826453	1.11616	2.67795	4.63431	0.344961
MSTRG.29609	0.496681	2.60647	1.31681	0.19468	0.507757	0	0.790868	0	0	0	0	0	0	0	0	0	0	0
MSTRG.29800	0.866429	0	0.253743	0	0	0	0	0	0	0.755598	0.28375	0.806413	0	0.991032	0	1.76952	0.750272	0.451555
MSTRG.30016	0	0	0	0	0	0	0	0	0.134234	0	0	0	0	0.0420964	0	0	0	0
MSTRG.30150	0.154928	1.65666	0	0.205289	0.23552	0.558204	0	0	0	0	0.232989	0	0.263423	0	0	0	0	0
MSTRG.30152	0	0	0	0	0.159095	0.1342	0	0	0	0	0	0	0.290548	0	0	0	0	0
MSTRG.30363	0	0	0.176747	0	0	0	0	0	0	0	0	0.301797	1.35471	0	0.841931	0	0	0
MSTRG.30454	0	0	0	0	0	0	3.49016	0	0	0	0	0	0.304093	0	1.63871	0	0	0
MSTRG.30482	0.239178	0	0.598711	0.0454511	0.217789	0	0.502973	0.123468	0	0.379643	0	0	0.785724	0.225016	0.321287	0.211349	0.205117	0.373737
MSTRG.30524	0.232109	0	0	0.338046	0	0.275849	0.825919	1.66725	1.13018	0.642882	0.334589	0.214914	0.942853	1.68839	0	0.382314	0.404043	1.61532
MSTRG.30535	0	0	0	0.171951	0.359549	0	0	0	0	0	0	0	0	0	1.73262	1.89595	1.95226	0.820684
MSTRG.30577	2.3691	7.52091	0.488243	1.69662	2.1177	0	0	0	0.470507	0	0	0	0	0	5.27928	4.08483	2.96786	0.648674
MSTRG.30580	0	0	0.128687	0.13717	0	0.79165	0.782435	0	0	0.0806697	0	0	0	0	0	0	0	0
MSTRG.30615	0.613822	0.36784	0.73295	3.07543	1.31423	0.168103	0.331224	20.8665	7.24949	0	8.28013	6.50416	6.98386	14.5015	5.43537	10.2301	0	3.53663
MSTRG.30799	11.8931	3.55377	9.27315	3.05414	1.88183	0	6.96667	0	0	0	0	0	0	0	2.06591	4.87674	7.29425	2.80145
MSTRG.30979	0	1.13076	0	0	0	0	0	0	0	0	0	2.72679	2.26182	0	0	3.48889	0	3.98129
MSTRG.310	1.26872	0.075048	1.50599	1.28861	0.446003	0.274463	0.345931	0	0	0.360409	0	0.12448	0	0	0.68355	1.07705	0.383595	1.20797
MSTRG.31051	0	0	0	0	0	0	0	0	0	0	0	0	0	0	0	0	0	0
MSTRG.31214	2.68982	0	0	1.32834	0	0	0	0	0	0	0	2.0296	0	0	0	0	4.27247	0
MSTRG.31229	0	0	0.0832051	0	0	0	0.184537	0	0	0	0	0	0	0	0.273747	0	0.0797167	0.041125
MSTRG.31323	0.317953	0	0.752411	0	0	1.2335	0.190262	0.434498	0	1.75497	2.42844	1.14813	0	0	1.55546	2.64949	0	0.665785
MSTRG.3141	0	0	0	0	0	0	0	0	0.966844	0	0	0	0	0.299932	9.46405	0	6.7284	0
MSTRG.31501	0	0	0.620075	0.107407	0	0	0	0	0	0	0	0	0	0	0	0	0.139468	0
MSTRG.31629	0	0	0.812896	0	0	0.445015	0	0.85444	0	0	0	0	0	0	0	0	0	0
MSTRG.31778	0	0	0	0	0	0	1.81803	0	0	0	0	0	0	0	0	0	0	0
MSTRG.32222	0	0.698532	5.55872	2.89096	0	33.8854	4.96639	1.66313	1.36621	6.58417	2.95799	0.658887	1.07997	0.631709	0	4.34376	0	0
MSTRG.32396	0.0267879	0	0.0847739	0.0262641	0	0	0.0642711	0.100343	0.349631	0.48503	0.669818	0.355991	0.274249	0.138221	0	0.250877	0	0
MSTRG.32402	75.7876	4370.13	0	367.401	561.804	0	0	0.630844	0.777772	3.97949	53.8759	0.372142	1.86387	1.08376	0.833246	0	166.004	721.391
MSTRG.32440	2432.65	1878.35	26.7711	539.863	391.486	0	0	674.95	655.876	0	45.2988	770.019	123.887	538.408	92.797	48.4004	44.0762	93.876
MSTRG.32489	0	0	0.318455	0	0	0	0	0	0	0	0	0	0	0	0	0	0	0
MSTRG.32491	0	0.190594	0.0434526	0.199923	0.292568	3.507	2.23676	0.0696974	0	0.664866	0.660802	0.887671	0.515118	0	0.490521	0	0.0898348	0
MSTRG.32507	0	0	0	0	0	0.795804	0	0.436803	0.539204	0	0	0	0	0	7.1666	0	0	0
MSTRG.32652	0	0	17.0031	0	0	11.3626	4.24345	0	0	0	0	0	0	0	1.97571	0	3.74753	0
MSTRG.32780	0	0.498299	0	0	0	0	0	0	0	0	0	0	0	0	0	0	0	0
MSTRG.32802	0	0	0	0	0	0	0	0	0	0.565444	0	0	0	0	5.67322	0	0	0
MSTRG.32804	0	0	0	0.172065	0.128768	0	0	0	0	0	0	0	0.159972	0	0	0	0	0
MSTRG.32823	0	6.6869	0	0.896696	0	0	0	0	1.90915	0	0	0	0	0	3.92528	0.325771	0.503434	0.597106
MSTRG.32834	0	0	0	0	0	0	0	0	0	0	0	0	0	0	0	0	0	0
MSTRG.32896	0.115101	0.617675	0	0.292816	0	0	0	0.589739	1.29794	0.166189	0.263352	0	0.402355	0.553281	1.52867	1.04717	0.189262	1.64239
MSTRG.3291	0	0	0	0	0	0	0	0	0	0	0	0	0	0	0	0	0	0
MSTRG.3292	0.0681587	0	0	0.352476	0.402204	0.234518	0	0	0	0	0.451271	0.190242	0	0	0.0784491	0.115518	0.0536232	0.357509
MSTRG.33086	0	0.28074	0	0	0	0	0	0	0.197753	0.44957	0	0.746444	0	0.371752	0.17299	0	0	0
MSTRG.33176	0	0	0	0	0	0	0	0	0	0	0	0	0	0	0	0	0	0
MSTRG.33273	0.0887682	0	0.166437	0	0	1.03688	0.677496	0.0799677	0	0.169832	0	0	0	0	0.524111	0	0.41325	0
MSTRG.33330	0	0	0	0	0	0	0	0	0	0	0	0	0	0	0	0	0	0
MSTRG.33333	0	0	0	0.0533281	0	0	0	0	0	0	0	0	0	0	0	0	0	0
MSTRG.33657	0	0.87246	0.630299	1.58339	0.829403	0	0.87626	0	0	0.145893	0.15219	0.476277	0	0	0.183253	0.145027	0	0
MSTRG.33795	0	0	0	0.310866	0.214239	0	2.17409	0	0	0.314013	0	0	0	0	0.35505	0.492389	0	0
MSTRG.33801	0	0.609734	0	0	0	0	0	0	0	0	0	0	0	0	0.861616	1.03206	0	1.15725
MSTRG.34011	0	0	2.31285	0	0	0	2.79696	0.893742	0	0	0	0	0	0	0	0.93982	0	0
MSTRG.34031	0	0	0.95912	0	0	0	0.335088	0	0	0	0	0.197105	0	0	0	0	0	0
MSTRG.34109	0	0	0	0	0	0	0	0	0	0	0	0	0	0	0	0	0	0
MSTRG.34364	0	0	0	0	0	0	0	5.17365	0	0	0	0	0	2.23162	0	0	0	0
MSTRG.34504	0.877666	0.335807	0	0.676572	1.34609	0	0	0	1.2138	0	0	0	0	0.207033	0	0.886973	0	0
MSTRG.3464	0.0669419	0	0	0	0.0920182	0.0825347	0	0	0	0.0512802	0	0.0665445	0	0.132509	0.123982	0	0	0
MSTRG.34798	0	0	1.03133	0	0	0	0	0	0	0	0	0	0	0	0	0	0.490688	0
MSTRG.35008	0.497915	0	1.36464	1.78107	0.511998	0.947616	2.172	0.822914	0.332007	0.118974	0.123968	0	0.280202	0.155363	0.640871	0	0.562821	0
MSTRG.35019	0	0	11.3478	0	0	4.31169	0	0	0	2.27423	3.22546	0	0	1.02945	5.18925	0	2.49484	5.36725
MSTRG.3505	0.464509	0.432565	0.967539	0.350072	0.737628	0	0	0	0	0	0	0	0	0	0	0	0	0.243756
MSTRG.35131	0	0	0	0	0	0.784432	0	0	0	0	0	0	0	0	0	0	0	0
MSTRG.3528	0.945699	3.40625	1.2637	2.27396	2.06358	2.66937	0.832785	0.846497	1.17187	2.03422	2.63319	0.842142	0.723262	0.997023	1.50495	4.91438	10.7541	4.79119
MSTRG.35318	0	0	0.136742	0	0	0	0	0	0	0.0295649	0	0.0381266	0	0.0380645	0	0	0	0.297282
MSTRG.35335	0	0	1.36221	0	0	0	0	0	0.716664	0.492757	0.517107	0	2.26071	0	1.62582	1.53111	0	0
MSTRG.35365	0	0	0	0	0	1.48403	1.52964	0	0	0	0	0	0	0	0	0	0	0
MSTRG.3550	0.139785	0	0.0800752	0.195826	0	0.165313	0.0405993	0	0	0	0.788264	0.275585	0.509616	0	0	0.137857	0	0
MSTRG.35713	0	0	0.034759	0.0208945	0	0	0	0	0	0	0	0	0	0	0	0	0	0
MSTRG.3574	0	0	0	0	0.324132	0	0	0	0	0	0	0	0	0	0	0	0	0
MSTRG.35773	0	0	0	0	0	0.14183	0	0.797915	0.718641	0	0.901409	0.56657	0.714465	0	0	0.888232	0	0
MSTRG.35854	0	0	0	0	0	3.42502	2.35554	2.62643	0	0	0	0.651598	0	0	0	0	0	0
MSTRG.35861	0	0	0.835417	0	0	0	0	4.27413	0	0	0	0.470658	2.19004	0	0.690831	0	1.11216	0
MSTRG.35955	0	0	0	0	0	0.437382	0	0	0	0	0	0	0	0	0.709824	0.293139	0	0.379821
MSTRG.35956	0	0	0	0	0	0	0	0	0	0.50361	0.523935	0.68619	0.879404	0.33367	2.28657	2.68666	1.38638	0.808332
MSTRG.36142	0.119103	0	1.2054	1.49243	1.24124	0	0	0.384229	0	0.82653	0.413421	0.349946	0	0	0	0	0.510327	0
MSTRG.36248	0	0	0.589607	0	0	2.92049	1.19087	0.349103	0.861564	0.901732	0.625967	0.825611	0.697217	0	3.7328	0.837556	0	3.94708
MSTRG.36312	0	0	0	0	0	0	0	0	0	0	0	0	0	0	0	0	0	0
MSTRG.36507	0	0.378487	0.40505	0.784304	3.1622	0.156663	0	0	0	0	0.702966	0	0	0	0	0.117625	0	6.45476
MSTRG.3657	3.73674	2.79464	6.96235	1.80639	0	6.19515	3.50836	10.9878	6.35997	0	4.46324	1.25943	4.3308	8.1408	2.49532	7.85168	10.0428	4.37576
MSTRG.36678	0	0	0	0	0	0	0	0	0.098282	0	0	0	0	0	0.178242	0	0	0
MSTRG.3673	0	0	13.4437	0	0	0	0	0	0	0.391771	0	0	0	0	0	0	0	0
MSTRG.36991	0.339895	0.811427	0.0294166	0.484409	0.223721	0	0	0.0666712	0	0	0.240758	0	0	0.14815	0	0	0	1.98092
MSTRG.3709	18.9425	30.7975	0.322291	21.2529	37.4134	0.885108	0.476311	0.969596	0.580832	1.03979	0.387381	0.354258	0.874681	0.474694	7.27433	12.6891	14.4673	7.02704
MSTRG.37104	0	0	0	0	1.33212	0.603361	1.23179	0	0	0.307923	0.962076	1.27006	0	0.409764	1.91842	0	0	0
MSTRG.37365	0	0	0	0	0	0	0	0	0	0	0	0	0	0	0	0	0	0
MSTRG.37406	0	0	0	0	2.46989	0	1.61659	0.639821	0	0	0	0	1.08257	0	0	0	0	0
MSTRG.37615	0.139364	0	0.450418	0.544743	0.519262	0.690843	0.970653	0.32208	0	0.640286	0.274411	0.170947	0.282453	0	0	0.218706	0	0.150843
MSTRG.37634	0	0.0925691	0	0	0	0	0	0	0	0	0	0	0	0	0	0	0	0
MSTRG.378	0	0.0529747	0.282736	0	0	0.291168	0.501615	0.209745	0	0.0907438	0.0473591	0.117555	0	0	0	0.084026	0	0
MSTRG.37853	0	0	0.100396	0	0.182567	0.691228	0	0.025237	0.0595989	0	0.227844	0	0	0	0.501178	0.0762541	0	0.108322
MSTRG.37998	0	0	0	0	0	0	0.607509	0.381079	0.113063	0.238288	0	0.266614	0	0	0.685167	0.0755229	0	0
MSTRG.38102	8.90908	1.84557	1.08653	2.66578	1.51038	2.67303	2.86347	2.98787	2.30181	2.15089	2.71436	2.57602	5.59957	4.56355	2.56564	3.51778	4.35832	2.46472
MSTRG.38163	0	0.361957	0.238877	0.286163	0	0	0	0	0	0	0	0.381208	1.68228	0	0	0	0	0
MSTRG.38216	0.356725	0.406991	0	0.264596	0.164894	0	0.156947	0.549625	0.621621	0	0.188269	0.387736	0	0.407153	0	1.22214	0	0
MSTRG.38228	0	0	0	0	0	0	0.477293	0.163009	0.594668	0.848635	0.14729	0.18823	0	0	0	0.651542	1.61648	0
MSTRG.38229	1.2548	0	0.310165	1.60991	0	0	0	2.28651	0.763089	0.360535	0.187574	1.21075	0.211138	0	0	0	1.08265	0
MSTRG.38388	0	0	0.0621427	0.0796233	0.0669079	0.214136	0.126048	0.125681	0	0.0543075	0.0992706	0.0348573	0.0322517	0.0697404	0.892033	0.60497	0.336494	0.299381
MSTRG.38688	2.6623	2.46747	12.8981	5.4517	2.53463	0	2.0685	0	0	0	0	0	0	0.417037	3.12355	2.58014	1.11961	0.231449
MSTRG.38746	0	0	1.04385	0	0.557929	3.19135	0.422862	0.146028	0.354089	0.886829	1.05584	0.167953	0	0	0.689165	0.283976	1.21374	0.737739
MSTRG.38860	0	0	0	0	1.3099	0	0	0.250976	0	0	0.904267	0	0	0	0	0	0	0
MSTRG.38923	0	0	3.40157	1.10846	0	8.31531	4.68045	1.8443	0	0.9573	0	0	2.4472	0.272085	3.78647	0	0	0
MSTRG.38935	0.125686	0.112297	0	0	0	1.36841	0.752399	0	0	0	0	0	0	0.720728	0	1.34737	0	0
MSTRG.39068	0	0	0.488767	0	0	0.993533	0	0.252609	0	4.23754	3.72766	2.14162	1.8883	0	0	0	0	0
MSTRG.39079	0	0	0.463143	0	0	1.64912	0	0.320875	0.585035	0.696033	0.144973	0	0.654556	0	0	0	0	0
MSTRG.39274	0	0	0	0	0.0690077	0	0	0	0	0	0	0	0	0	0.19417	0	0	0
MSTRG.3932	0	0.0295661	0.320578	0	0	0	0	0	0	0	0	0.735044	0	0	1.49244	0.544412	0	0.655285
MSTRG.39325	0	0	0	0	0	0.970649	0	0	0	0	0	0	0	0	0	0	0	0
MSTRG.39337	0.0612793	0	0	0	0	0.113556	0.0745403	0.054478	0.194259	0.0942834	0.22142	0.213854	0.0558414	0.060867	1.24457	0.394636	0.675241	1.82988
MSTRG.39399	3.75662	0.143665	3.73416	1.20332	1.09786	0.119226	0.117111	1.07175	1.81428	0.701232	0.889191	1.22568	1.33733	0.773289	2.83449	1.76428	5.37755	1.31242
MSTRG.39489	4.10468	0.227184	3.45852	0.840461	1.2171	0	3.37138	1.26846	1.65039	0.94067	1.81865	0.978004	0.741714	1.56987	0.656175	0.45281	0.398259	0
MSTRG.39502	0	0	0.14197	0.10613	0.452704	0	0	0	0	0	0	0	0	0	0	0	0	0
MSTRG.39646	0.713952	0	11.2327	0	0	17.651	6.16794	1.00021	1.23375	1.70364	0.445538	0	0	0	2.76575	7.70902	3.87049	0
MSTRG.39726	0	0	0	0	0	0	0	0	0	0	0	0	0	0	0	0	0	0
MSTRG.39758	0	0.141984	0	0	1.21865	0.38251	0	0.132239	0.479705	0.114702	0	0.757836	0	0.449071	0	0	0	0
MSTRG.39781	0	0	0	0	0	0	0	0	0	0.118174	0	0	0	0	0	0	0	0
MSTRG.40012	0	0	0	0	0	0	0	0	0	0	3.92488	0	0	0	0	7.51516	0	0
MSTRG.40016	0	0.154061	0	0.24832	0.757606	0.870385	0	1.29717	1.00693	1.36759	1.1812	0	1.19957	0.658481	2.65289	0.906044	0.832152	1.14368
MSTRG.4002	0.0706581	0	0	0	0.0738935	0	0.351644	0.100746	0.0967007	0.171131	0	0.290969	0	0	0	0	0	0
MSTRG.40617	0	0	0	0	0	1.96416	0	0	0.0365984	0	0.0498709	0	0.189053	0	0	0	0.158727	0
MSTRG.40740	0.00611558	0	0.00744576	0.0777658	0	0.0308198	0	0.0113615	0	0.0539847	0.0780482	0.0502759	0.0408323	0	0.476409	0.140134	0.213351	0.320256
MSTRG.40844	18.5807	18.8531	126.367	89.7315	54.6062	5.50409	44.2944	33.161	33.4261	19.49	61.6693	9.23738	9.16234	34.6337	101.202	157.99	302.488	16.7859
MSTRG.40901	0	0.297924	2.21017	0	0	0	0	0	0	0	0	0	0	6.52517	12.1283	2.32085	30.0293	3.54029
MSTRG.41108	0	0.194968	0.285501	0.0687828	0.462564	0	0.530828	0	0.475686	0.564837	0.287359	0.28263	0	0	1.12353	0.20106	0.442639	1.30146
MSTRG.41163	0	0	0	0	0	0	0	0	0	0	0.375495	0	0	0	0	0	0	0
MSTRG.41215	0.405782	0.356432	4.42132	1.54984	2.83719	17.4021	5.46122	0	3.37238	3.80697	2.04886	1.79199	1.06883	0.34821	8.79547	7.07679	3.64344	4.66082
MSTRG.41244	0	0	0.232621	0	0.2149	0	0.259871	0	0	0	0	0	0	0	0.473331	0.325928	0.267244	0.250423
MSTRG.41326	1.64497	6.48258	2.13709	2.85175	0.41244	0	0	0	0	0.274407	0	0	0	0	0.238634	2.54467	2.28715	0.562902
MSTRG.4136	0.804428	0.322377	0	6.81231	0	15.9773	0	1.94484	0	0	0	0	0	0	0	0	0	0
MSTRG.41372	0	3.69601	0	4.48535	8.12805	1.84109	4.43365	0.119755	0.144435	0	0	0	0	0	0	0	0	0
MSTRG.41533	0	0	18.0511	0	0	46.4115	6.5722	0.868531	4.24555	5.05704	4.60241	3.09051	1.64334	3.91979	27.1107	7.19046	9.45415	5.10568
MSTRG.41666	0	0	0	0	0	0	0	0	0	0	0	0	0	2.75992	0	0	0	0
MSTRG.41849	0.0390069	0.492478	0	0.231779	0.208442	7.59321	1.37965	1.44686	0.835274	0.711995	0	1.52214	0.667923	0.506212	0.703254	0	2.71162	1.61351
MSTRG.41876	0	0	0.0426469	0	0	0.276593	0	0	0	0	0	0	0	0	0	0	0	0
MSTRG.41878	0.460014	0.0847404	1.3811	0	0	0	0	0	0	0	0	0	0	0	2.12938	1.28484	2.74336	2.90358
MSTRG.41977	2.64557	3.23042		3.18698	0	0	0	0	0	0	0	0	0.160099	0	0.666011	0	4.12934	0
MSTRG.42075	0	0	0	0	0	0	0	0	0	0	0	0	0	0	0	0	0	0
MSTRG.42114	0.0182298	0.110618	0	0	0	0.0228679	0	0.0335368	0.0592867	0	0.015137	0.0186082	0.0172115	0.0558388	0.263065	0.149338	0.0276803	0
MSTRG.42149	0	0	0	0	0	0	0	0	0.469002	0.326415	0.340131	0	0	0	2.04988	0	0	1.08215
MSTRG.42222	0	0	0	0.165161	0.185353	0	0	0	0	0.110669	0	0	0	0	0.101746	0	0.0858915	0
MSTRG.42243	3.37386	0.285057	0.215426	1.54077	0	2.33567	3.32159	1.94771	0	0.53309	3.15005	2.56418	2.62228	1.2704	1.83304	1.46918	1.19329	0.246093
MSTRG.42327	0.198496	0.375676	0.0574761	0.0804295	0	0	0	0	0	0	0	0	0	0	0.0964315	0	0	0
MSTRG.42373	0	0	0	0	0	0	0.438545	0	0	0.388505	0	0	0	0	0.623829	0	1.15878	0
MSTRG.4246	0.0219599	0.148334	0.0198415	0.0257236	0.0288419	0.770291	0.132001	0.161112	0	0.643809	0.20733	0.0671093	0	0.156571	0	0	0	0
MSTRG.42518	0	0	0	0	0	0	0	0	0	0.62089	0	0	0	0	0	0	0	0
MSTRG.42542	0	0	0	0	0	0	0	0	0.803638	0	0	0	0	0	0	0	0	0
MSTRG.43033	0.276055	0.328618	0	0	0.129879	0	0	0	0	0	0	0.681302	0.163655	0.347334	3.87098	1.99283	1.33801	0
MSTRG.43136	0	0.735804	0	0	0	0	0	0	0	0	0	0	0	0	0	0	0	0
MSTRG.43293	0.235947	0.94916	0	0.677113	0.127116	8.78002	1.73236	1.63069	0	0	0	1.31432	0	0.549732	0	0.283172	0	0
MSTRG.43452	0	2.36489	0	0	0	0	0	0	0	0	1.21062	0.52261	0	0	0	0	0	0
MSTRG.43601	3.45448	0	0.486785	0.423542	0	0	0	0	0.123618	0	0	0	0	0	0.252033	0	2.4857	0.382469
MSTRG.43655	0	0	0	0	0	0	0	0	0	0	0	0	0	0	0	0	0	0
MSTRG.43662	0	0	0	0	0	1.07679	0	0	0	0	0	0	1.03349	0	0	0	0	0
MSTRG.43822	1.12838	7.0525	0.718532	2.96679	2.18617	6.84148	0	0.346657	0	0	0.48081	1.49008	0.637649	0.771156	1.28578	0	1.65894	0.447127
MSTRG.44084	0	0	8.13106	0	0	0	0	0	0	0.174961	0.728272	0	0	0	0	0	0	0
MSTRG.44352	0	1.29564	0	0	0	4.88165	1.3017	0	2.0986	0	0	0	0	1.94045	4.75222	4.46581	4.46057	0
MSTRG.44372	0.0293824	0	0	0	0	0.220548	0.275555	0.0420446	0	0	0	0	0	0.0402979	0.200846	0.0488257	0	0
MSTRG.44479	3.85334	3.77405	0.429003	1.49847	2.45873	2.50377	2.67591	2.79523	3.21956	2.30912	3.12813	0.915571	2.31198	4.82212	0	0	2.17181	0
MSTRG.44488	0	0.584846	0	0	0	0	0	0	0	0.594871	0	0.157397	0.140101	0	6.08827	1.83867	1.68846	1.02975
MSTRG.44515	0	0	0	0	0	7.84573	0	0	0.725504	0	0	0	0	0	0	6.2123	0	0
MSTRG.44581	0	0	0.146138	0.219703	0	0	0	0	0	0	0	0	0	0	0	0	0	0
MSTRG.44616	0.175343	0.569102	0.0132239	0.304345	0.463459	2.82463	1.05523	0.488154	0.773334	0.861054	0.801644	0.615228	0.57781	0.465791	1.41867	0.857364	0.747633	0.486559
MSTRG.44766	0	3.21575	0	1.76471	0	9.59483	7.85134	2.2758	4.81147	0.560739	2.04268	1.15155	0.325658	0	6.89577	2.30428	1.57613	1.82509
MSTRG.44859	0	0	0	0	2.83057	0	0	0	1.22042	2.1072	0	0	0	0	6.83342	1.26852	2.54879	2.87077
MSTRG.45063	2.80037	0.254963	1.94681	4.6163	2.49158	1.92995	0	1.81358	0	0.116605	0.785408	0	0	0	2.30828	0	2.69763	3.70133
MSTRG.45221	0.590817	1.28741	0.264666	4.56213	5.73857	2.28196	1.54194	5.74407	7.12977	4.49653	4.19071	3.3216	3.57237	5.01826	5.5627	2.4962	1.91892	0.797698
MSTRG.45290	0	8.9038	0	0	0	12.4634	16.7647	0.998028	1.21546	3.7106	0	1.77283	2.80583	0	17.9678	13.9275	0	0
MSTRG.45298	0	0	0	0	0	0	0	0	0	0	0	0	0	0	0	0	0	0
MSTRG.45329	0.618963	0	0	0	0	19.3803	21.7405	0.882297	0	0	0.393896	0	0	0	0	0	0	0
MSTRG.45405	0	4.95062	0.449187	0	0	0	0	0.319647	0	0	0	0	0	0	15.9264	3.17594	1.66544	6.04291
MSTRG.45406	0	0	0	0	0	0	0	0.319647	0	0	0	0	0	0	0	0	0	0
MSTRG.45439	0	4.6183	0	0	0	10.9833	2.32234	0	0	0.909237	0.476202	0.635988	1.04477	0.915274	2.97405	0	0	0
MSTRG.45462	0	0	0	0	0	0	0	0	0	0.0831577	0.346905	0.10891	0.0982187	0	0.212504	0	0	16.3112
MSTRG.45572	0	2.41208	0	0	0	1.7904	0.608923	0	0	0.916314	0	0	0	0	1.90081	0	0	0
MSTRG.45606	0.44203	0.0668885	0.0748379	0.162582	0.109468	2.41778	2.88944	0.807081	0.71474	0.261641	0.159392	0.336659	0.310557	1.59808	0.150256	0.304817	0.0845512	0
MSTRG.4577	1.38642	1.07084	0	0.986636	0.987688	0	0	0	0	0	0	0	0	0	10.8364	0	6.19743	7.54166
MSTRG.4578	0	0.986811	0.341061	0.683646	0	5.9913	2.61586	1.01107	0	5.87086	4.95021	1.80021	3.57573	1.18518	5.66568	0	0	4.0874
MSTRG.45845	0.389781	10.7986	1.02777	0	2.6426	51.1477	27.2875	4.9883	9.39789	18.7618	9.49592	5.87454	11.8044	3.69616	70.6754	10.1618	20.967	21.9949
MSTRG.45902	2.18296	0	2.38408	0.107613	2.31551	0	0	0	0	0	0	0	0	0	0	1.17932	0.783137	0
MSTRG.45945	0	0	0	0	0	0	3.84521	0.840539	1.02796	2.10072	0.74266	0	0.796951	0.949152	2.38359	2.31247	0	4.94237
MSTRG.45964	0	3.72581	0	0	0	13.5031	3.75322	0	0	0.808739	0	0	0	0.541324	3.91481	0	1.21435	4.1154
MSTRG.45991	0	0	0	0	0	0	0	0	0	0	0	0	0	0	0	0	0	0
MSTRG.46032	1.00488	0	0	0	1.05745	0	7.65026	0	0	0	0.516561	0	1.41461	0	0	0	0	1.5756
MSTRG.46110	0	0	0	0	0	0	0	0	0	0	0	0	0	0	0	0	0	0
MSTRG.46259	0	1.88788	0	0.602222	0.417891	0	0	0	#N/A	0	0	0	#N/A	#N/A	0.443974	0.83268	0.319699	0.352634
MSTRG.46469	0	0	0	0	0	0.955473	0	0.453517	0	0	0	0	0	0	0.973819	0	0.139468	0
MSTRG.46510	0	0.209967	0	0	0	0.215665	0.638427	0.306918	0.183327	0.132893	0	0.173208	0.157174	0	1.65053	0.129935	0.283785	0.710543
MSTRG.46525	0	0	0	0	0	0	0	0	0	0.622178	0	0	0	0	0	0	0	0
MSTRG.46543	0	0	0	0	0	0	0	0	0	0	0	0	0	0	0	0	0	0
MSTRG.469	0	0	0	0	0	17.2197	0	0	0	0	0	0	0	0	0	0	0	0
MSTRG.46930	0	0	0.40922	0	0	0	0	0	0	0.319991	0.166542	0	0	0	0.985476	0	1.60739	1.44628
MSTRG.47134	0	4.18328	0.299839	0	0	20.7864	5.34728	0.24204	0.597257	0.825492	1.51029	0.574974	1.18828	0.276394	9.34656	2.47371	1.24378	5.61199
MSTRG.47167	0	2.64769	0	0	8.26991	13.7153	0	2.26116	0.923984	0	0.666949	0	0	1.70675	2.13096	0	0	0
MSTRG.47235	12.3918	3.71007	19.8529	16.8267	9.97889	5.95533	6.42818	4.69369	4.16315	12.424	8.87634	4.62442	3.91562	2.53928	9.30597	20.3292	114.565	58.6136
MSTRG.47542	0	0.931453	0	0	0	0	0.938305	0	0	0	0	1.12559	0	0	1.30494	0	2.4287	1.3718
MSTRG.47546	0	4.35708	0	0.571398	0	0	0	0.25721	0	0	0	0	0	0	0	0	0.598212	0
MSTRG.47585	0	1.10639	0	2.51025	0	15.8411	7.79171	0	5.15884	0.889351	0.931136	0	0.511215	1.78962	7.25455	1.35354	5.42611	1.522
MSTRG.47591	0	0.344427	0	1.39361	3.30333	0.347449	0.348463	0	0	0.19714	0	0	0	0	0	0.494132	0	0
MSTRG.47599	0	0	0	0	3.461	0	0	0	0	0	0	0.603541	0	0.386314	0	0	0	0
MSTRG.4763	28.793	0	10.6303	2.38202	3.65987	0	0	0.994066	0.0990997	0	7.13536	0	0.678603	1.58121	4.67694	1.84888	11.47	14.4671
MSTRG.47879	0	0	0	0	0	0	0	0	0	0	0	0	0	0	0	0	0.762534	0
MSTRG.48096	0	0	0	0	0	0	0	0.317794	0	0.54837	0	0	0	0.363972	10.2233	1.12055	3.83695	4.44952
MSTRG.48124	0.182381	0	0	0.375987	0	0	0	0.716843	0	0.760365	0.768739	0	0	0	0	0	0	0
MSTRG.48303	0	4.25077	0	0	0	0	0	0	0	0	0	0	0	0	7.90283	0	3.74753	2.05828
MSTRG.48430	0.315839	0.373554	0	0	0	1.50406	1.13355	0	0.897353	0	0	0.285285	0.246464	0	3.7315	0	2.80376	4.62954
MSTRG.48470	5.70514	0	19.0511	0	0	2.1385	1.12806	7.42148	7.53215	5.47262	1.72115	10.3945	6.13067	7.26484	20.3702	1.25334	3.38932	20.5965
MSTRG.48477	0.302049	0.519405	0	0	0.546085	7.57701	0	0	1.2463	0	0	0	0	0	0	0	0	0
MSTRG.48547	1.25013	2.61343	0.878778	0.99258	2.27021	0.579144	0.367197	0	0.307779	0	0	0	0	4.4773	2.03538	6.96383	1.97574	2.66571
MSTRG.48549	0	0	0	0	0	0	0	0	0	0.258874	0	0.35316	0.301193	0	0	0	0	0
MSTRG.48566	0	0.236451	0	0	0.607581	0.603848	0.179641	0	0.227668	0.659478	0.568046	0.93478	1.03419	0.284269	2.48023	0.942981	0.760347	0.310552
MSTRG.48593	0	0	0	0	0	0	0	0	0.498356	0	0.367736	0	0.414041	0	1.01323	0	0.452937	1.08026
MSTRG.48598	0	0	0	0	0	0	0	0	3.37571	1.85986	2.92369	1.95329	0	0	0	0	0	0
MSTRG.48684	0	1.89823	0.434009	0	0	5.14911	0	0	0.825475	1.13089	2.38223	0.798363	1.93965	0.762687	13.2375	3.60539	26.8457	38.4578
MSTRG.48721	4.36658	0	8.62012	2.63443	5.16867	0	0	56.6976	34.7754	78.0593	82.4973	16.9742	57.8797	47.833	9.81636	5.68756	22.431	11.484
MSTRG.48807	0	4.55887	0	0	0	12.8931	2.93357	1.59261	2.2853	2.52664	3.10609	1.87025	1.33941	1.51897	2.92562	1.19728	6.83034	14.5678
MSTRG.48905	0	0	0	0	0	0	0	0	0	0	0	0	0	0	0	0	0.311498	2.56698
MSTRG.48907	0.113909	1.65922	0.430794	0	1.60728	0	0	0	0	0	0	0	0	0	0	1.21631	1.59988	0.774797
MSTRG.49036	0	1.63334	0	1.64884	0	4.77482	4.11685	0.436803	1.07841	0.747456	1.56034	0	1.72541	1.99774	9.55547	3.28756	0	1.25775
MSTRG.49166	0	2.1757	1.6466	2.48642	2.0302	7.00537	3.67369	2.07007	8.31393	11.8159	10.8107	22.4369	6.58618	2.46683	11.1118	4.75467	7.2942	4.90945
MSTRG.49181	12.3859	19.9446	0.273124	2.5267	0.601629	0	0	5.10607	0	1.24416	7.76529	0	0	0	0.609573	0	2.19664	0
MSTRG.49193	0	3.03641	0	0	0	1.40825	1.52284	0	2.25959	3.10309	1.6302	0.72751	2.37018	0.696176	10.2893	4.86604	3.23097	3.58497
MSTRG.49197	0	10.6269	0	0	6.83842	17.0439	4.24345	2.10201	2.58061	1.76581	2.48275	0.832438	4.70703	1.58931	15.8057	1.88984	11.2426	12.3497
MSTRG.49220	0.519775	1.38689	0	0	0.311915	3.90168	3.06319	0	0.587782	0	0	0	0	0	0.688063	1.84455	0.089678	0
MSTRG.49246	0	0	0	0	0	0.211935	0	0	0	0.252471	0.131508	0	0	0	2.40207	0.56542	0	1.10206
MSTRG.49407	0	1.26283	0	0	0	1.27665	0.319475	0.633232	0.258389	0.549117	0.571351	0.738074	1.92899	0.48195	4.22178	0	0.945199	0.56236
MSTRG.49559	0	0	0	0	0	0.106991	0	0	0	0.0659464	0	0	0	0	0	0	0	0
MSTRG.49629	2.44765	5.31386	0	1.80729	0	0	0.732296	0	0.644861	0	0	0.703722	0	0	0.42658	0	0	3.47348
MSTRG.49681	0	0	0	0	0	0	0	0	0	0	0	0	0	0	0	0	0	0
MSTRG.49707	0	0	0	0	0	0	0	0	0	0	0	0	0	0	0	0.251043	0.269356	0.987532
MSTRG.50054	0.0665321	0	0	0.080966	0	0.369185	0	0.0589069	0.280351	0.101964	0	0	0.301858	0.175643	1.35515	1.19722	1.15723	1.46062
MSTRG.50055	0	0	0	0	0	0.349615	0	0	0.146653	0.210807	0	0	0	0.183153	1.67205	0	0.973993	1.3449
MSTRG.50130	0	3.91963	0.211769	0	0	15.2184	6.69815	0.354889	0.437965	0.458157	0.318083	0.209892	0.354122	0.406386	3.32641	0	2.18133	3.01402
MSTRG.50250	0	0	0	0	0	0	0	0	0	0	0	0	0	0	0	0	0	0
MSTRG.50332	0.285747	0	0	0	0	0	0	0	0	0	0.21649	0	0	0	0	0.222097	0	0.293827
MSTRG.5036	0.442891	1.1112	0.0780355	1.87875	1.16257	5.73487	7.73293	1.22547	0.43531	1.54452	0.972996	1.18363	3.07353	1.58998	0.629034	1.31606	1.53166	0.225337
MSTRG.50370	0	8.22334	0	0	0	12.4461	9.04911	0	0.508995	1.41355	0.737141	0	0	0	10.0923	1.02313	4.14687	3.54645
MSTRG.50373	0.850187	3.01092	0.272646	0.807451	0.403342	3.15372	2.98365	2.63479	1.35628	5.267	1.48304	0.705942	3.1941	0.742888	0.654357	1.92321	0.758066	0.818248
MSTRG.50417	0	0	0	0	0	0	0	0	0	0	0	0	0	0	0.466494	0.244137	0	0
MSTRG.50472	0	0	0	0	0	1.77137	0	0	0	0	0	0	0	1.0715	2.58043	0	1.20006	1.35662
MSTRG.50567	0	16.3586	0	0	0	16.3926	6.44701	0.801339	6.86753	10.3707	3.54238	1.90236	3.04892	4.52978	4.53951	0	4.33509	0
MSTRG.50658	0	0.231492	0	0	0	1.73006	1.34957	0	0	0	0	0	0	0	0	0	0	0
MSTRG.50695	0	0	0	0	0	0	0	0	0	0	0	2.03269	3.81097	2.93917	0	0	0	0
MSTRG.5070	0	0	0	0	0	0	0	0	0	0	0	0	0	0	0	0	0	0
MSTRG.50726	0	0	0	0	0	0	0	0	0	0	0	0	0	0	0	0	0	0
MSTRG.5073	0	0	0	0	0	0	0.0579186	0	0	0.487822	0.225708	0	0	0	0.130385	0.483046	0.17726	0
MSTRG.50840	26.18	7.58273	19.586	3.33528	19.5985	5.99555	7.7213	22.0969	6.36792	13.451	27.8141	17.2738	11.251	25.4118	5.55146	6.3737	5.76482	2.63698
MSTRG.50850	0	0.378894	0	0	0	0	0	0	0	0	0	0	0	0	1.89118	0	0.56872	2.68104
MSTRG.50902	0	0.56175	0	0	1.22571	3.43074	0.227537	0.312251	0.758521	0.270925	0	0.539995	0.15929	0.354612	1.86178	0.926024	0.328856	0.398306
MSTRG.50914	0.502243	0.315882	0.879477	0	0	9.35904	2.55125	0	0	0	0	0.651599	0	0	10.1936	4.44906	2.72123	2.08438
MSTRG.5119	0	1.31478	0	0	0.599817	0.167645	0.0411162	0	0.036233	0.066443	0.124924	0	0.0157838	0	0	0	0	0
MSTRG.5121	0	0.964545	0	0.432512	0.220806	0.0829687	0	0	0	0	0	0	0	0	0	0	0	0.0653124
MSTRG.51232	0	1.42216	8.88802	0	0	16.4739	0.954968	0	0	0.817038	0.427015	1.13765	0	0	0	1.22149	0	0
MSTRG.51243	1.02268	4.54693	0	0.168622	0	18.2519	6.24647	1.13992	1.12864	1.27511	1.34605	1.08938	0.733449	5.53776	7.64316	4.78608	2.82015	2.18477
MSTRG.51300	0	27.6757	0	0	0	45.3142	25.3174	2.48134	3.03575	4.48226	1.46191	0.981506	0.785075	1.86874	42.2038	6.81592	2.24276	14.5914
MSTRG.51338	0	0	0	0	0	0	0	0	0	0	0	0	0	0	0	0	0	0
MSTRG.51347	0	0	0	0	0	0	0	0	0	0	0.0965458	0	0.0750613	0	0.0985801	0.0799438	0.0622693	0.177711
MSTRG.51361	1.70887	5.21361	0	0.909644	0	0	0	0	0	0	0	0	0	0	0	0	0	0
MSTRG.51466	0.446863	0	0	0	0	0	0	0	0	0.0673402	0	0	0	0.69785	0	0	0	0
MSTRG.51478	7.04273	10.2145	3.13008	5.84812	12.6242	130.146	116.425	7.42209	7.44497	11.2364	3.08005	8.28599	7.11116	16.4183	5.93203	6.83636	2.53675	1.92351
MSTRG.51509	0.129451	0	0	0.205847	0.0578875	0.375553	0	0	1.3826	0	0.562174	0	0	0.216781	0.709983	1.2105	1.20404	0.596138
MSTRG.51510	0.802111	0	0	0.657835	0	0	0	1.95262	1.39639	0	2.46003	0	0.731718	2.58234	0	1.36958	0	0
MSTRG.51558	0	4.04196	0	0	0	1.06294	0.381117	0	0	0	0.0623594	0	0	0.309277	0	0.689158	1.00598	0
MSTRG.51648	0	0.475903	0	0	0	0.682766	0.192952	0	0.0833269	0.0604838	0.126223	0	0.0715689	0	0	0.582328	0.637354	0.809605
MSTRG.51674	0.0792059	0.371437	0.0575876	0	0.0662938	1.11238	0.596471	0.370609	0.318558	0.426987	0.0743395	0.176012	0.452939	0.11091	0.0687077	0	0.0192485	0
MSTRG.51710	0	0	0.0632111	0	0.207913	0.0952865	0	0	0.0741733	0.0397163	0.0207309	0	0	0	0	0	0	0
MSTRG.51712	0	0	0	0	0	0.120897	0	0	0.102511	0	0	0.0969029	0	0	0	1.18353	0	0.803369
MSTRG.51732	0	0	0.442098	0	0.280633	0	0	0	0	0	1.68099	0	0	0	0	0	0.1603	0
MSTRG.51807	0.940722	3.95467	0.721724	1.63982	1.00576	2.54544	1.15846	0.422412	1.27595	0	1.37991	0	0.66177	1.14651	1.43328	4.46379	5.0308	1.06502
MSTRG.51855	0	0.207683	0	0	0	0.568287	0.277538	0	0.111887	0	0	0	0	0.0600696	2.35452	0	0	1.71603
MSTRG.51856	1.45314	1.32436	0	0	1.71859	0	0	3.89941	0	0	2.3493	0	1.22449	0	0	0	0	0
MSTRG.51980	0	0	0	0.624979	0	0	0	0	0	0	0	0	0	0	0	0	0	0
MSTRG.51982	0	1.39813	0	0	0	0	0	0	0	0.49867	0.523465	0	0.571805	0	0	0	0	0
MSTRG.52044	0.395437	4.57684	0.645468	1.33084	1.64306	10.9389	2.27517	2.16209	0	13.5202	8.60775	2.46902	2.65549	2.37804	9.92675	6.57165	3.81384	3.01237
MSTRG.52121	0	0	0	0	0	0	0	0	0	0.427746	0	0	0	0	0.790249	0	1.04928	0
MSTRG.52125	34.7938	19.243	28.4332	61.0725	66.9852	8.66923	7.06698	38.0904	24.7817	30.7146	39.1218	18.4228	35.6288	53.1383	36.0671	53.0775	78.0195	17.6044
MSTRG.52167	0	0.141716	0	0.0254191	0.0569081	0.289218	0.0945316	0.293826	0.512694	0.298022	0.384104	0.134672	0.19764	0.15727	0.787031	0.222534	0.148753	0.319298
MSTRG.52205	0	0	0.0237498	0.0609863	0.0754111	0.275208	0.204002	0.324484	0	0.313756	0	0	0	0	0.684923	0.74112	0.42549	0.291681
MSTRG.52244	24.3388	21.4478	32.8597	23.9151	42.8071	6.23232	1.90917	15.1598	15.2632	38.6129	51.4042	25.9757	13.7971	22.9744	61.9022	71.9954	347.428	156.112
MSTRG.52384	0	4.6465	0.0690273	0	0	11.4432	4.98352	0.902164	2.1803	2.29151	1.04845	0.66415	0.79027	0.65617	7.60363	0.486342	1.43647	1.91765
MSTRG.52426	3.37833	0.557988	4.29941	0.932218	0.809651	0	0	0	0	0	0	0	0	0	2.12098	2.43021	2.26769	1.84529
MSTRG.52451	11.8849	1.3482	4.93896	9.2755	9.49922	2.74459	3.18552	27.9464	12.1363	19.6421	17.6359	12.5999	10.5131	19.8583	56.5982	63.8957	73.3349	31.8645
MSTRG.52481	0	0.77232	0	0	0	1.30698	0.521253	2.29361	0.86	0.918487	0.15937	0	0	0.803315	0.429043	0.719337	0.381011	0.916568
MSTRG.52487	0	0	0	0	0	0	0	0	0	0	0	0	0	0	4.6038	1.25528	1.32169	0
MSTRG.5256	0.104982	0.0802593	0.0167306	0.10406	0	0	0	0	0	0	0	0	0	0	0.036434	0.173105	0.0269409	0.0254023
MSTRG.52561	2.24719	4.42178	4.72993	0	3.41839	1.09808	1.11668	3.32758	0.410468	0	0	2.35848	0.665975	0.381105	0	0	0	0.936193
MSTRG.52625	0.408848	0.320558	0.195523	0.197548	0.126609	0.692439	0.325082	1.14497	0.701475	0.742279	1.05353	0.538352	0.542308	0.733888	0.652754	0.627786	0.477011	0.141117
MSTRG.52798	0	0	0	0	0	0	0	0	0	0	0	0	0	0	0	0	0	0
MSTRG.52809	0	0.459656	0	0	0	0.296808	0.243757	0	0	0	0	0	0	0	0	0	0	0
MSTRG.52820	0.184406	0.900626	0.0263257	0.298165	0.566622	0	0	0.428388	0.164716	0.475151	0.188155	0.506375	0.0359975	0.465614	0.814092	0.682393	3.00573	0.597017
MSTRG.52821	0.435162	0.694137	0.130325	0.532354	0.701929	0.981699	0.351814	1.40619	1.14204	1.65983	1.15477	0.575047	0.654951	1.50215	1.07791	1.68187	2.88186	1.59682
MSTRG.52910	2.08991	2.27216	27.7831	2.59877	2.04948	9.11077	8.22448	5.4489	7.45663	8.13858	9.27556	6.60001	4.69073	8.41777	5.28435	7.7956	8.94674	2.75137
MSTRG.52927	0	0	0	0.0973433	0.478375	0	0	0.33546	0	0	0	0	0	0.386372	1.04506	0	0.39684	0
MSTRG.53058	0	4.20767	0	0	0	3.36904	0	0	3.65557	7.46747	2.26408	2.53376	0.809145	0	0	0	0	2.51149
MSTRG.53207	1.06223	21.9108	2.45704	3.66529	9.06383	45.9569	12.3628	19.4811	33.0069	79.2583	16.9654	32.4971	38.0015	20.263	40.4301	35.9092	33.3257	20.2439
MSTRG.53220	0.207643	0.486524	0.0921335	0	0	1.23632	0	0.335424	0.816392	0.43656	1.96982	1.55089	0.512897	0	3.64119	1.68783	5.0184	6.91863
MSTRG.53247	1.25888	0	0	0	0	0	1.16988	5.14969	1.8198	4.05484	1.22209	3.0858	0	2.88438	2.01739	0	0	1.99213
MSTRG.53248	0	0	0	0	0	4.03846	0	0	0	0	0	0	0	0	2.55009	0	0	0
MSTRG.53298	0.112849	3.25619	0.0765392	0.870019	0.845661	9.55177	2.65934	2.66881	3.60255	11.2385	6.71003	3.10283	3.04707	3.13375	13.8115	14.1513	5.93432	5.84932
MSTRG.53302	0	0	0	0	0	0	0	0	0	0	0	0	0	0	0	0	0	0
MSTRG.53370	4.89121	0.981776	27.3148	84.5323	72.6374	12.3899	0	3.82738	2.26008	8.11294	1.65128	4.76209	2.23499	6.04329	86.4077	24.8802	49.9592	56.7924
MSTRG.53431	0.269871	0.259547	0.0485937	0.0649717	0	0.267405	0.789417	0.193032	0	0	0	0	0	0.0538594	0.0992574	0	0.168875	0
MSTRG.53442	0	0	0	0.229783	0	0.204055	0.202664	0	0	0	0	0	0	0	0	0	0	0
MSTRG.53447	0.0628743	0	0	0	0	0	0	0	0	0.331018	0	0.117828	0.382847	0.301951	0.109492	0	0	0
MSTRG.53471	0	8.1759	0	0	0	0	0	0	0	0	0	0	0	0	0	0	0	0
MSTRG.53550	0.277605	0.183421	0.136763	0.207505	0.199522	1.84858	0.527023	0.138501	0.24519	0.738292	0.45847	0.307938	0.236879	0.256506	0.853666	0	0	0.444491
MSTRG.53605	0.56362	0.184926	0.0922891	0.430731	0.48513	0.31762	0.249987	0.183641	0.108927	0.476595	0.207305	0.256835	0.0941475	0.102436	0.376343	0.435075	0.079972	0.101515
MSTRG.53682	4.53317	14.3416	0.434456	7.22059	8.12865	4.78819	11.774	7.36319	6.21361	6.21937	8.9962	4.30986	2.62047	5.98904	3.09428	2.31273	1.50156	1.33572
MSTRG.53690	0.756338	0.997052	1.33384	0.244173	0.36572	1.97239	2.10631	0.811641	1.95624	2.56424	2.98769	1.53045	1.5372	0.972651	1.37618	6.54342	1.58712	1.55411
MSTRG.53832	2.53148	1.89557	0.295532	2.02763	1.05308	9.4266	6.4456	4.29485	4.86059	3.80865	4.22471	4.17356	2.20227	2.56871	3.52253	5.26106	2.68636	1.12519
MSTRG.5384	0.629972	2.06147	0.991262	1.0944	0.824289	0	0	1.78409	1.20678	2.43838	1.49567	0.654983	1.71906	1.15256	2.58136	3.60739	3.74001	0.359518
MSTRG.53936	0	0	0	0	0	0	0	0	0	0	0	0	0	0	0	0.547517	0	0
MSTRG.53988	2.74655	2.94983	7.71622	0	0	0	0	2.88297	0	3.27006	0	1.60276	0	0	0	0	0	0
MSTRG.54011	0	0	0	0	0	0	0	0	0	0	0	0	0.831376	0	2.27516	0	0	0
MSTRG.54105	2.0635	0.757326	0.619037	0.415191	0.468081	1.70186	1.04698	3.22026	2.36768	3.53815	3.64704	3.15013	2.09604	2.51137	0.633613	0.816683	1.07911	0.569467
MSTRG.54140	7.1829	1.18839	25.877	6.31157	12.0199	36.4495	43.9398	5.1401	8.19619	13.2018	7.84457	7.36851	4.23442	9.79724	1.16922	4.28288	5.41445	3.69504
MSTRG.54161	0	0	0	0	0	0	0	0	0	0	0	0	0	0	0.105753	0	0	0.113636
MSTRG.54219	0	0.414829	0	0	2.64801	2.78984	0	0.21221	0.189522	1.57112	0.830259	0	0.534043	0	0.787348	1.44549	1.94214	0.661873
MSTRG.54231	0	0	0	0	0	0	0	0	0	0.4371	0	0.168619	0	0.548606	0	0	0	0
MSTRG.54326	2.31844	0.261128	0.55992	1.52218	1.38774	0.707957	0.529613	2.09307	1.27917	2.7673	2.44543	1.53364	1.33919	1.94328	6.83989	10.886	10.926	8.23684
MSTRG.5434	0.125586	0.451626	0.324008	0.171856	0.579407	0.482403	0	0.782423	0	0.568119	1.5966	0.62484	0.45728	0.254067	0.519004	1.05048	1.28023	1.38449
MSTRG.54568	0.551679	0.330307	0.247929	0.588691	0.188316	0	0.167417	0	0.797964	0.474719	0	0.54781	0.374715	0.681654	0.564935	0	0	0.826736
MSTRG.54654	0	0	0	0.197041	0	0.235045	0.115312	0	0	0	0	0	0	0	0.439581	0.314513	0	0.292507
MSTRG.54800	0.0411877	0.596185	0.0371347	0.147116	0.386015	0.563704	0	0.111594	0.308291	0.611232	0	0.249103	0.190764	0.165744	0.852479	0	0.764922	0.406067
MSTRG.54813	0	1.61978	0	1.16797	0.700932	9.35323	2.86654	1.04176	1.92134	1.80342	0.234489	0.611338	0	1.19214	18.7932	4.0931	6.6784	7.13047
MSTRG.54828	0	0.480323	0	1.62863	1.83	1.08652	0.531326	0	0.280127	0	0	0.264962	0	0	0	0	0.398438	0
MSTRG.54895	6.08063	0.67703	1.73604	10.0974	4.972	10.1559	7.09486	5.54234	8.90191	5.89431	1.28091	1.25614	3.94496	6.24564	0	5.36565	4.2665	2.03614
MSTRG.54936	0.419753	0.130622	0	0.0461419	0.222503	0	0	0	0	0	0	0.711683	0.499877	0.311864	0.424965	0.216592	0.506846	0.679834
MSTRG.55263	7.15161	0	0.458302	0.879542	1.12787	1.37028	0	4.14781	3.29082	3.0456	5.08276	0	3.34698	2.69977	3.53852	3.44296	4.45315	0
MSTRG.55408	0	70.5255	0	0	0	0	0	0	0	0	0	0	0	0	0	0	0	0
MSTRG.55431	2.25398	3.31917	5.5604	5.0205	6.49581	9.50463	5.56551	11.2445	19.3456	19.121	10.1649	4.97184	7.92384	20.1333	18.1364	8.798	23.7392	6.088
MSTRG.55433	3.25485	76.1847	0	0	0	0	0	4.32655	0	0.604985	0	0	0	0	0	0	0	0
MSTRG.55434	0	0	0	0	0	0	0	0	0	0	0	0	0	0	0	0	0	0.939162
MSTRG.55437	0	0.147367	0.363889	0.693763	0	0	0.141379	0.200961	0.0711569	1.20109	0.186434	0	0.19168	0.540035	0	0.0702	2.21035	0.763286
MSTRG.55443	8.37179	6.31132	3.31933	2.86755	4.07913	4.82107	6.03189	9.48383	10.2754	6.0283	8.50735	14.1058	6.31948	13.291	7.99939	21.2762	15.3823	8.61667
MSTRG.55514	49.3257	29.1294	33.186	95.8076	100.271	11.377	56.3668	36.2082	5.39399	16.1478	18.7151	17.8041	4.17266	45.8156	25.0677	19.526	62.558	12.9764
MSTRG.55616	0.947222	0.199684	0.22532	1.24089	1.87339	1.33942	1.5815	1.84264	2.88862	1.44354	1.46082	2.65082	1.14713	2.39525	6.88316	6.02627	4.56624	0.841257
MSTRG.55643	0.355194	0.17737	0.0188804	0.523908	0.235322	0.534291	0.33406	0.527261	0.857434	0.732604	0.234034	1.1074	0.231947	0.636634	2.15822	1.04071	0.422267	1.14946
MSTRG.55667	0	0	0	0	0	0	0	0	0	0	0	0	0	0	0	0	0	0
MSTRG.5568	0.1757	0.306155	1.3458	1.21052	0.702736	20.6017	3.53272	1.33548	3.80319	8.88107	3.87326	5.42706	4.12974	0	8.43373	0	3.47898	2.13515
MSTRG.55733	0	0	0.0527011	0.244787	0.412118	0.489961	0.144907	0	0.451192	0.324862	0.293511	0	0	0	0.991001	0.363689	0.281919	0.244747
MSTRG.55797	0	0.414443	0	0	0	4.15907	0	0.265435	0.326472	0.229695	1.19465	0	0.535765	0.303794	0	0	1.24188	0.728391
MSTRG.55871	0.102356	0.0615703	0.0460905	0.614573	0.761403	1.01521	0.499393	0.934966	1.19683	0.158685	0.786868	0.359158	0.564247	0.562757	1.22163	1.23118	0.221533	0.405569
MSTRG.55883	0	0	0.396313	0	0	0.356427	0	0.495087	0	0	0	0	0	0	0.284568	0	0.497666	0
MSTRG.55902	0	0	0	0	0	1.79973	0	0.46129	0	0.266822	0.138958	0.177177	0	0	0	0	0	0
MSTRG.55906	0.912553	5.47029	0	3.81649	0	11.8516	8.35843	2.06681	0.762838	6.41439	1.00897	2.02663	2.21911	1.41009	0	0	0.819334	0
MSTRG.55985	1.92008	0.867353	0.571509	0.226492	0.633624	1.98091	2.47294	0	0	2.77473	0.329017	0.645396	0	1.8348	0	0.441456	4.72011	0.735296
MSTRG.56006	0	0	0	0	0	0	3.05376	2.36688	0	0	0	0	0	0	0	0	0	0
MSTRG.56031	5.05488	8.88945	1.35321	6.67154	0	5.46207	0	4.40598	4.47897	7.63729	5.3055	3.61946	2.4297	5.0188	0	5.67015	5.59541	0
MSTRG.56110	0	0.395872	0	0	0	0	0	0	0	1.32785	0	0	0	0	0	0	0	0
MSTRG.56131	0	1.83946	0.23098	1.98107	2.79496	0	2.1718	0	0	0.729948	3.62121	0.95852	0.62718	1.409	3.58741	1.96217	0.916811	2.73159
MSTRG.56141	0	0.659336	0	0	0	0	0.576977	0	0	0	0	0	0	0	0	0	0	0
MSTRG.56153	0.760254	1.15389	0.50665	0.524487	2.72802	1.43657	1.57939	2.01416	1.49818	1.72776	2.24727	2.3215	2.11647	2.463	0	1.22296	1.30337	0.394822
MSTRG.56180	1.86879	7.29786	0.552801	4.68534	5.43716	12.6105	5.41858	4.02508	2.44918	3.638	1.51525	2.90792	2.05159	4.19595	0.809153	2.70053	3.58457	1.29724
MSTRG.56201	0	0	0	0	0	0	0	0	0	0	0	0	0	0	0	0	0	0
MSTRG.56242	0	0	0	0	0	0	0	0	0	0	0	0	0	0	0	0	0	0
MSTRG.56357	0.0560373	0.0547791	0.121915	0	0.814471	0.717487	0	0	0.342388	0.855758	0	0.444469	0.260462	0.921095	0.257129	1.00057	0.402777	0.178943
MSTRG.56421	0	0	0	0.132351	0	0	0	0	0	0.21446	0.309894	0.234601	0	0	0	0	0	0
MSTRG.56507	0	0	0	0	0	0	0	0	0.836779	0	0	0	0	0.773091	1.91863	0	0	0
MSTRG.56533	0	17.0217	0	0	0	12.9351	0	0	1.1151	0	0	0	0	0	5.18925	2.53236	0	0
MSTRG.56732	0	0	0	0.639827	0	1.72914	0	0	0.674817	1.6601	0.246699	0	0.276413	0.31387	0.711505	0	1.93559	0.755291
MSTRG.56740	0.890967	1.09404	0.195373	0.90974	2.24175	4.34884	3.86821	1.04555	3.80102	3.89006	3.06156	1.75481	2.91951	5.07348	6.72349	3.52209	1.20356	0.928194
MSTRG.56741	0	0.856238	1.10521	0	0	3.74395	1.72603	0	1.6666	1.15414	0	0	0	2.05777	4.93595	1.13535	0	1.29862
MSTRG.56755	1.08495	16.1604	0.94055	0	0	34.5718	18.4051	10.0953	5.30869	4.83988	1.91549	0.856564	2.07218	12.2592	16.2845	1.9516	3.86673	2.11907
MSTRG.56773	0.0604274	58.7424	0	0	0	0	0	0	0	0	0	0	0	0	0	0	0	0
MSTRG.56840	0	0	0.0824274	0.315231	0	0.868215	0	0	0	1.25706	0.433006	0.151648	0.27831	0	0	4.75116	1.68114	1.53917
MSTRG.5687	0	0	0.0839274	0.167115	0	0.455115	1.13754	0.251294	0.04964	0.601097	0.189106	0.187228	0.30065	0.0933837	0	0	0	0.184129
MSTRG.57025	1.40812	1.99363	3.37365	1.04076	1.898	3.37987	3.22561	6.7353	2.22619	2.78209	4.54447	2.28638	4.16055	5.47653	1.26318	1.92218	1.55256	1.79054
MSTRG.57118	0	0	0.781137	0	0	0	0	0	0	0	0	0	0	0	0	0	1.61549	0
MSTRG.57223	0	0	0	0	0	4.31169	2.72462	0	0	0	1.61273	0	0.861334	0	11.6758	7.59709	0	0
MSTRG.57253	0	0.139135	0	0	0	0.574202	0	0	0.534956	0.147282	0.232744	0	0.178354	0.271046	0	0.321676	0.593236	0
MSTRG.57281	0	0	4.91541	0	0	0	0	0	0	0	0	0	0	0	0	0	0	0
MSTRG.5737	0	0	0	0	0.859736	0	0	0	0.139762	0	0	0.244443	0	0	0.648279	0	0	0
MSTRG.5939	0	0	0	0.725666	0	0	0	0	0	0	0	0	0	0	0	0	0	0
MSTRG.595	0	0	0.0449697	0	0.47511	2.53282	0	0	0	1.53272	0.550736	0.0820214	0.151331	0.107355	0.373224	0.461102	0.579331	0
MSTRG.6041	0	0.0777328	0.0583101	0	0	0.080008	0	0	0.0683776	0.0497515	0.155777	0	0.235682	0	0	0.0931712	0	0
MSTRG.6137	0	0	0	0	0	0	0	0	0	0	0	0	0	0	0	0	0	0
MSTRG.6143	0	0	0	0	0	0	0	0	1.3272	0.283036	0.032836	0.121732	0.529994	0	0.0734401	0.22502	0	0
MSTRG.6167	0.453456	2.51346	0	0	1.15857	3.60484	2.82099	0	2.27552	11.5612	7.82285	0.396248	4.52925	0	23.6496	7.97745	4.08564	5.66587
MSTRG.6292	0.0796475	0.236269	0	0.0821326	0.125687	0.985989	0	0.282697	0	0	0	0	0	0.404194	0.22817	1.55957	0.458404	0.592327
MSTRG.6355	0	0	0	0	0	0	0	0.189662	0.376469	0	0.0893292	0	0	0.28297	0	0	0	0
MSTRG.6361	0	0	0	0	0	2.03169	0	0	0	1.40463	0	0.836482	0	0	0.275231	0	0	0.120314
MSTRG.6726	0	1.35136	7.09598	4.07064	9.63532	1.02292	0.683633	0	1.23414	1.16367	1.21062	0.52261	0.90754	0.25563	10.1567	1.93636	1.52014	4.20555
MSTRG.6822	0	0.757114	0.38059	0.967397	0.580297	0.864488	0.725489	1.51427	2.05059	0	3.52455	0	0	0	5.85823	4.44873	2.01628	3.00254
MSTRG.6825	0	0	0	0.115481	0	0	0	0	0	0	0	0	0	0	0	0	0	0
MSTRG.6870	0.126256	1.46099	0.0252545	0.539879	1.19606	0	0	0	0	0	0	0	0	0	0	1.77526	0	2.20783
MSTRG.6954	0	0	0	0	0	0	0	0	0	0	0	0	0	0	0	0	0	0
MSTRG.6987	8.96585	1.21607	1.31397	2.25617	2.95343	1.29644	0.160892	0	0	0	0	0	0	0.361287	3.39958	1.7242	0	2.40013
MSTRG.7047	0	0	0.217842	0.923285	0.270794	0	0	0.104565	0	0.22547	0.104284	0	0	0.079369	0	0.118356	0	0
MSTRG.7125	0.348657	13.927	1.55202	3.44229	5.5392	3.26979	7.46616	0.372109	0	0.359568	1.56866	0.214552	0.168635	0	3.81975	13.8625	6.20746	1.49418
MSTRG.7199	0.117337	0	1.49941	1.13305	0.986961	0	0	0	#N/A	0	0	0	#N/A	#N/A	0	0	0.543836	0
MSTRG.7317	8.16748	1.79375	14.8313	20.9386	11.9022	8.41188	0	0	1.87669	15.2511	0	6.09685	0.986081	6.67147	3.55503	5.75351	25.1423	9.19914
MSTRG.734	0	0	0	0.226247	0.449953	0.515772	0.590295	1.42848	3.5524	0.687044	0.146369	3.8314	1.73594	0	0	0.25008	0.175253	0
MSTRG.7343	0	0	0	0	0	1.52565	0	0	0	0	0	0	0	0	0	0	0	0
MSTRG.7397	0	16.098	0	3.42945	2.42208	0	0	0	19.352	0	0	0	38.9689	8.19671	14.3153	0	0	0
MSTRG.7438	8.18289	4.66507	4.80562	5.02903	4.88104	0	0	0	0	0	0	0	0	0	0.475945	2.45804	3.22018	1.27757
MSTRG.7552	0.0631681	12.141	0	6.78767	0	29.0391	12.4193	2.66514	0	0.85525	1.09332	0	0	0	0	0	0	0
MSTRG.7697	0.37203	19.6511	0.284075	2.95247	2.73505	17.7255	8.1439	3.28635	5.38113	2.78865	0.506541	0.662473	1.87187	6.23918	10.3156	1.10039	2.54148	3.37394
MSTRG.7698	0	7.95825	1.05232	0	0	8.66875	1.94989	0	0	0.258874	1.88541	0.70632	1.20477	0.343235	3.1471	0.695322	1.43304	4.17017
MSTRG.7700	0	0	0.131716	0	0.293072	0	0	0	0	0	0	0	0	0	0	0	0	0
MSTRG.7727	48.4284	35.8276	9.14795	20.4979	8.34696	23.332	13.5014	9.3685	11.415	14.3529	7.65883	10.8838	7.57365	9.87608	6.05337	10.1578	9.36902	5.71252
MSTRG.7803	0	2.49078	0.804798	0	0.426303	0.243403	0.480807	0.923865	0.722241	0	0.233625	0.487677	0	1.95446	0	0	0	0
MSTRG.7994	0	0.438437	0	0	0	2.63523	0.443266	0	1.36791	0.490772	0	2.28692	1.11988	1.90846	0	0	2.62144	0
MSTRG.8044	0	0	0	0	0	0.963402	0	0	0	0	0	0	0.485094	0	1.36668	0	0	0
MSTRG.8080	0	0	0	0	1.13235	0	0	0	0	0	0	0	0	0	0	0.100084	0.417686	0
MSTRG.8091	0	0.269986	0.0248035	0.14749	0.369738	9.06915	1.24608	0.444792	1.01278	2.04418	1.57244	0.980576	1.28988	0.594443	1.85968	1.24979	1.23423	1.09516
MSTRG.8199	0	0.939072	0.367936	0.511106	0.722427	0.925675	0	0.368838	0.103836	0.328719	0	0.284665	0.197428	0	0	4.42918	0.980552	0.170981
MSTRG.8215	0	0.382103	0.0380203	0.0651917	0	0.0878408	0.135538	0	0	0	0	0	0	0	0	0	0	0.204505
MSTRG.8352	0	0.750728	0	0	0	0	0	0	0	0	0	0	0	0	1.17962	0	1.20625	0.598254
MSTRG.8402	0	0	0.277058	0.259396	1.32613	1.88401	0.992685	0	0	0.511542	0.160529	0.301801	0.181866	0.798683	0	0	0	0
MSTRG.8403	0	0	0	0	0.122959	0	0	0	0	0.0730442	0.0508527	0.0313521	0	0	0	0	0.094919	0
MSTRG.8426	4.22961	1.79472	0	3.35494	3.05931	3.13972	1.48475	8.25664	1.7236	4.79204	4.29667	0.749552	2.68329	0.990839	3.30117	2.34421	7.34099	1.76118
MSTRG.8438	107.523	40.2654	46.3683	295.425	494.722	5.60256	1.8041	78.3261	32.3683	178.336	96.6329	36.0681	40.1239	68.5616	78.182	32.4403	162.594	63.4244
MSTRG.853	0	0.59869	0.122116	0	0	0	0	0	0	0.699757	0	0	0.713159	0	0	0.767666	0	0
MSTRG.8540	0	0.207951	0.157637	0.240829	0	2.33128	0.631808	0	0.881966	0.252471	0	0	0.445676	0.330034	3.08837	1.41355	0.906389	0.367353
MSTRG.8641	0	0.319361	0	0	0	0.246492	0	0	0.0701909	0.357393	0.0532856	0	0.0604592	0	0.246782	0.19187	0.105373	0
MSTRG.8732	0	1.17014	0	0	0	0	0	0	0	0	0	0	0	0	0	0	0	0
MSTRG.8827	0	0	0.670309	0	0	0	0.355476	0	0	0	0.330298	0.150969	0.21556	0	0	0.225128	0.499979	0.97544
MSTRG.9052	0	0.44928	0.217564	0.368642	0	0.502105	1.62812	0.330522	0	0.4297	0	0.14814	0	1.7424	0.419505	0.437038	0.119732	0
MSTRG.9108	0	0.224515	0.183953	0.129657	0.460116	0.531311	0.193541	0.422027	0.842242	1.27176	1.57359	0.6194	0.698556	0.849911	1.90254	1.51607	1.09586	0.541387
MSTRG.9212	0	0	0	2.79949	0	0	0	0.681495	0	0.587098	0	0	0	0.962589	0	0	0	0
MSTRG.9213	0	0	0	0	0	0	0	0	0	0	0	0	0	0	0	0	0	0
MSTRG.9229	0	0	0.442044	0	0.140091	0	0	0	0	0	0	0	0	0	0.748822	0.36434	0.672798	0.022309
MSTRG.9346	0	0.175256	0	0.358722	0	0	0.0888254	0	0.153746	0	0	0.145159	0.0661186	0.0722214	0	0	0	0
MSTRG.9427	0	0	0	0	0	0	0	0	2.19339	2.98347	2.37867	0	1.6955	0	0	4.97183	7.34948	0
MSTRG.9719	0	0	0	0.676137	0	7.25631	3.78867	1.22897	1.91769	0.833276	0.879468	1.78514	0.861444	1.36275	0	0	0	3.33506
MSTRG.9753	0	0	0.417552	0	0	0	0	0	0	0.65174	0.607951	0	0	0	0	0	0	0
MSTRG.9777	0	0.143882	0	0	0.09935	0	0	0.232345	0	0	0.29386	0.318212	0.705175	0	2.16332	4.09887	2.55115	1.30024
