# Supplementary material for: Genome-wide discovery and characterization of long noncoding RNAs in African oil palm (Elaeis guineensis Jacq.)
Source: PeerJ. 2020 Nov 2;8:e9585. doi: 10.7717/peerj.9585 (PMC7643553; doi:10.7717/peerj.9585)
Supplement: Supplemental Information 7 [file peerj-08-9585-s007.xlsx]

## Sheet: Table S6
Table S6 A detailed List for predicted target genes of lncRNAs with genomic location and annotation.
LncRNA	LncRNA class		Contig	lncRNA genomic position			target gene	Sequence character		Target gene potistion				Target gene description
				start	end	strand		genomic loci	Transcript	Contig	start	end	strand	Protein_ID or ncRNA or pseudogene	Gene annotation
MSTRG.105	NAT-lncRNA	II	NC_025993.1	658546	666202	-	LOC105044920	antisense-overlapped	not overlapped	NC_025993.1	653093	658548	+	XP_010921356.1	PREDICTED: uncharacterized protein LOC105044920 isoform X1 [Elaeis guineensis]
MSTRG.172	NAT-lncRNA	II	NC_025993.1	1418226	1427151	-	LOC105041130	antisense-overlapped	antisense-overlapped	NC_025993.1	1413725	1426330	+	XP_019708972.1	PREDICTED: ABC transporter G family member 39-like [Elaeis guineensis]
MSTRG.339	NAT-lncRNA	II	NC_025993.1	3352295	3355625	-	LOC105053414	antisense-overlapped	antisense-overlapped	NC_025993.1	3351099	3352857	+	XP_010932889.1	PREDICTED: inactive protein RESTRICTED TEV MOVEMENT 2-like [Elaeis guineensis]
MSTRG.591	NAT-lncRNA	II	NC_025993.1	6328094	6336017	+	LOC105038263	antisense-overlapped	not overlapped	NC_025993.1	6332418	6339459	-	XP_010912311.1	PREDICTED: uncharacterized protein LOC105038263 [Elaeis guineensis]
MSTRG.706	NAT-lncRNA	II	NC_025993.1	8507588	8508713	+	LOC105039486	antisense-overlapped	antisense-overlapped	NC_025993.1	8508522	8510781	-	XP_010913954.1	PREDICTED: probable WRKY transcription factor 53 [Elaeis guineensis]
MSTRG.797	NAT-lncRNA	III	NC_025993.1	9626135	9626651	-	LOC105041822	antisense-overlapped	not overlapped	NC_025993.1	9612992	9631019	+	XP_019703672.1	PREDICTED: protein timeless homolog isoform X2 [Elaeis guineensis]
MSTRG.892	NAT-lncRNA	III	NC_025993.1	10834826	10835152	+	LOC105041373	antisense-overlapped	not overlapped	NC_025993.1	10817060	10841076	-	XP_010916647.1	PREDICTED: uncharacterized protein LOC105041373 isoform X2 [Elaeis guineensis]
MSTRG.923	NAT-lncRNA	III	NC_025993.1	11369894	11370218	-	LOC105041028	antisense-overlapped	antisense-overlapped	NC_025993.1	11369327	11370648	+	XP_010916124.1	PREDICTED: LOW QUALITY PROTEIN: early nodulin-like protein 1 [Elaeis guineensis]
MSTRG.992	NAT-lncRNA	III	NC_025993.1	12036196	12036496	-	LOC105040708	antisense-overlapped	not overlapped	NC_025993.1	12029847	12039676	+	XP_010915669.1	PREDICTED: uncharacterized protein LOC105040708 [Elaeis guineensis]
MSTRG.1131	NAT-lncRNA	III	NC_025993.1	13809936	13812508	+	LOC105042742	antisense-overlapped	not overlapped	NC_025993.1	13802578	13815193	-	XP_010918347.1	PREDICTED: probable inactive ATP-dependent zinc metalloprotease FTSHI 1, chloroplastic [Elaeis guineensis]
MSTRG.1185	NAT-lncRNA	III	NC_025993.1	14438221	14441551	+	LOC105042400	antisense-overlapped	not overlapped	NC_025993.1	14434502	14443316	-	XP_010917894.1	PREDICTED: putative ubiquitin-conjugating enzyme E2 38 [Elaeis guineensis]
MSTRG.1355	NAT-lncRNA	III	NC_025993.1	17126292	17128436	-	LOC105043751	antisense-overlapped	not overlapped	NC_025993.1	17120153	17146664	+	XP_010919742.1	PREDICTED: putative methyltransferase NSUN6 [Elaeis guineensis]
MSTRG.1427	NAT-lncRNA	III	NC_025993.1	17998166	17998477	+	LOC105043206	antisense-overlapped	antisense-overlapped	NC_025993.1	17996981	17998800	-	XP_010918971.1	PREDICTED: ethylene-responsive transcription factor 1B [Elaeis guineensis]
MSTRG.1469	NAT-lncRNA	II	NC_025993.1	18387135	18394382	-	LOC105049023	antisense-overlapped	antisense-overlapped	NC_025993.1	18384238	18387465	+	XP_010926866.1	PREDICTED: cytochrome P450 72A15-like isoform X1 [Elaeis guineensis]
MSTRG.1474	NAT-lncRNA	III	NC_025993.1	18448567	18472630	-	LOC105048975	antisense-overlapped	not overlapped	NC_025993.1	18447990	18474797	+	XP_010926808.1	PREDICTED: cytochrome P450 72A15 isoform X1 [Elaeis guineensis]
MSTRG.1475	NAT-lncRNA	III	NC_025993.1	18452829	18453298	-	LOC105048975	antisense-overlapped	not overlapped	NC_025993.1	18447990	18474797	+	XP_010926808.1	PREDICTED: cytochrome P450 72A15 isoform X1 [Elaeis guineensis]
MSTRG.1622	NAT-lncRNA	III	NC_025993.1	20107077	20107525	+	LOC105048083	antisense-overlapped	antisense-overlapped	NC_025993.1	20100684	20118371	-	XP_010925626.1	PREDICTED: AMSH-like ubiquitin thioesterase 1 isoform X3 [Elaeis guineensis]
MSTRG.1639	NAT-lncRNA	III	NC_025993.1	20271315	20274482	+	LOC105047991	antisense-overlapped	antisense-overlapped	NC_025993.1	20259099	20275774	-	XP_019701967.1	PREDICTED: protein farnesyltransferase subunit beta isoform X3 [Elaeis guineensis]
MSTRG.1743	NAT-lncRNA	II	NC_025993.1	21373260	21374276	+	LOC105047393	antisense-overlapped	not overlapped	NC_025993.1	21374276	21379263	-	XP_010924617.1	PREDICTED: sm-like protein LSM8 [Elaeis guineensis]
MSTRG.1746	NAT-lncRNA	II	NC_025993.1	21388942	21397396	+	LOC109505909	antisense-overlapped	antisense-overlapped	NC_025993.1	21397302	21397715	-	XP_019706426.1	PREDICTED: uncharacterized protein LOC109505909, partial [Elaeis guineensis]
MSTRG.1761	NAT-lncRNA	III	NC_025993.1	21576046	21576564	+	LOC105047324	antisense-overlapped	antisense-overlapped	NC_025993.1	21562366	21576731	-	XP_010924520.1	PREDICTED: probable protein phosphatase 2C 67 [Elaeis guineensis]
MSTRG.1798	NAT-lncRNA	III	NC_025993.1	21907240	21908644	-	LOC105046957	antisense-overlapped	not overlapped	NC_025993.1	21901243	21912177	+	XP_019701652.1	PREDICTED: protein-lysine N-methyltransferase Mettl10-like isoform X3 [Elaeis guineensis]
MSTRG.1841	NAT-lncRNA	III	NC_025993.1	22326699	22326939	-	LOC105046609	antisense-overlapped	antisense-overlapped	NC_025993.1	22306111	22327360	+	XP_010923559.1	PREDICTED: mediator of RNA polymerase II transcription subunit 25 isoform X2 [Elaeis guineensis]
MSTRG.1915	NAT-lncRNA	III	NC_025993.1	23282918	23285902	+	LOC105046044	antisense-overlapped	not overlapped	NC_025993.1	23275908	23289707	-	XP_010922862.1	PREDICTED: chaperone protein dnaJ 10 [Elaeis guineensis]
MSTRG.1977	NAT-lncRNA	II	NC_025993.1	23845698	23854301	+	LOC105045652	antisense-overlapped	not overlapped	NC_025993.1	23849808	23872897	-	XP_010922312.2	PREDICTED: LEAF RUST 10 DISEASE-RESISTANCE LOCUS RECEPTOR-LIKE PROTEIN KINASE-like 2.1 [Elaeis guineensis]
MSTRG.2123	NAT-lncRNA	II	NC_025993.1	26345311	26351718	-	LOC109505525	antisense-overlapped	antisense-overlapped	NC_025993.1	26343927	26350307	+	XP_019704045.1	PREDICTED: receptor-like serine/threonine-protein kinase SD1-8 [Elaeis guineensis]
MSTRG.2125	NAT-lncRNA	I	NC_025993.1	26452137	26475672	+	LOC109505916	antisense-overlapped	not overlapped	NC_025993.1	26449967	26456212	-	XP_019706497.1	PREDICTED: LOW QUALITY PROTEIN: receptor-like serine/threonine-protein kinase SD1-8 [Elaeis guineensis]
MSTRG.2125	NAT-lncRNA	II	NC_025993.1	26452137	26475672	+	LOC105049973	antisense-overlapped	not overlapped	NC_025993.1	26472455	26480650	-	XP_019701854.1	PREDICTED: receptor-like serine/threonine-protein kinase SD1-8 [Elaeis guineensis]
MSTRG.2168	NAT-lncRNA	III	NC_025993.1	27359137	27366321	+	LOC105050084	antisense-overlapped	not overlapped	NC_025993.1	27352324	27368526	-	XP_019706557.1	PREDICTED: LOW QUALITY PROTEIN: G-type lectin S-receptor-like serine/threonine-protein kinase At2g19130 [Elaeis guineensis]
MSTRG.2279	NAT-lncRNA	III	NC_025993.1	28889454	28889857	+	LOC105052254	antisense-overlapped	antisense-overlapped	NC_025993.1	28888757	28922540	-	XP_019707399.1	PREDICTED: cysteine-rich receptor-like protein kinase 6 [Elaeis guineensis]
MSTRG.2280	NAT-lncRNA	I	NC_025993.1	28892772	28943369	+	LOC105052254	antisense-overlapped	antisense-overlapped	NC_025993.1	28888757	28922540	-	XP_019707399.1	PREDICTED: cysteine-rich receptor-like protein kinase 6 [Elaeis guineensis]
MSTRG.2280	NAT-lncRNA	I	NC_025993.1	28892772	28943369	+	LOC109506114	antisense-overlapped	antisense-overlapped	NC_025993.1	28891940	28893325	-	XP_019707410.1	PREDICTED: cysteine-rich repeat secretory protein 38-like [Elaeis guineensis]
MSTRG.2280	NAT-lncRNA	IV	NC_025993.1	28892772	28943369	+	LOC105052857	antisense-overlapped	antisense-overlapped	NC_025993.1	28911576	28919346	-	XP_019707416.1	PREDICTED: cysteine-rich receptor-like protein kinase 6 [Elaeis guineensis]
MSTRG.2280	NAT-lncRNA	II	NC_025993.1	28892772	28943369	+	LOC105052848	antisense-overlapped	not overlapped	NC_025993.1	28939736	28943550	-	pseudogene	cysteine-rich repeat secretory protein 38-like [ Elaeis guineensis (African oil palm) ]
MSTRG.2464	NAT-lncRNA	I	NC_025993.1	31296743	31343341	+	LOC105051394	antisense-overlapped	antisense-overlapped	NC_025993.1	31290784	31297909	-	XP_019706670.1	PREDICTED: protein DETOXIFICATION 40 isoform X2 [Elaeis guineensis]
MSTRG.2464	NAT-lncRNA	II	NC_025993.1	31296743	31343341	+	LOC105051389	antisense-overlapped	antisense-overlapped	NC_025993.1	31318066	31344037	-	XP_010930122.1	PREDICTED: protein DETOXIFICATION 40-like [Elaeis guineensis]
MSTRG.2465	NAT-lncRNA	III	NC_025993.1	31297374	31297667	+	LOC105051394	antisense-overlapped	antisense-overlapped	NC_025993.1	31290784	31297909	-	XP_019706670.1	PREDICTED: protein DETOXIFICATION 40 isoform X2 [Elaeis guineensis]
MSTRG.2824	NAT-lncRNA	III	NC_025993.1	36980635	36980940	-	LOC105054619	antisense-overlapped	antisense-overlapped	NC_025993.1	36980607	36992520	+	XP_019709691.1	PREDICTED: serine/threonine-protein phosphatase PP2A-2 catalytic subunit [Elaeis guineensis]
MSTRG.2876	NAT-lncRNA	III	NC_025993.1	37614906	37621465	+	LOC105054968	antisense-overlapped	antisense-overlapped	NC_025993.1	37614139	37622681	-	XP_010934941.1	PREDICTED: uncharacterized protein LOC105054968 [Elaeis guineensis]
MSTRG.3057	NAT-lncRNA	III	NC_025993.1	40526894	40529320	-	LOC105055781	antisense-overlapped	not overlapped	NC_025993.1	40508790	40533603	+	XP_010936073.1	PREDICTED: tryptophan synthase alpha chain [Elaeis guineensis]
MSTRG.3227	NAT-lncRNA	II	NC_025993.1	44118258	44131201	-	LOC105056986	antisense-overlapped	antisense-overlapped	NC_025993.1	44118129	44125881	+	XP_010937703.1	PREDICTED: eukaryotic translation initiation factor 3 subunit M [Elaeis guineensis]
MSTRG.3383	NAT-lncRNA	IV	NC_025993.1	47150618	47176054	-	LOC105058483	antisense-overlapped	not overlapped	NC_025993.1	47153703	47157383	+	XP_010939737.1	PREDICTED: uncharacterized protein LOC105058483 [Elaeis guineensis]
MSTRG.3444	NAT-lncRNA	III	NC_025993.1	49046838	49047359	+	LOC105058873	antisense-overlapped	not overlapped	NC_025993.1	49044026	49048191	-	pseudogene	oxysterol-binding protein-related protein 2A-like
MSTRG.3599	NAT-lncRNA	IV	NC_025993.1	52593672	52631274	-	LOC105059614	antisense-overlapped	not overlapped	NC_025993.1	52594451	52598203	+	XP_010941288.1	PREDICTED: 9-cis-epoxycarotenoid dioxygenase, chloroplastic [Elaeis guineensis]
MSTRG.3678	NAT-lncRNA	III	NC_025993.1	54364808	54365391	+	LOC105059937	antisense-overlapped	not overlapped	NC_025993.1	54363067	54367710	-	XP_010941766.1	PREDICTED: BEL1-like homeodomain protein 4 [Elaeis guineensis]
MSTRG.3768	NAT-lncRNA	II	NC_025993.1	57093145	57093712	-	LOC105061149	antisense-overlapped	not overlapped	NC_025993.1	57091582	57093165	+	XP_010943413.1	PREDICTED: homeobox-leucine zipper protein HAT22 [Elaeis guineensis]
MSTRG.3810	NAT-lncRNA	III	NC_025993.1	58375192	58375870	+	LOC105060976	antisense-overlapped	not overlapped	NC_025993.1	58374592	58386949	-	XP_010943189.1	PREDICTED: COMPASS-like H3K4 histone methylase component WDR5A [Elaeis guineensis]
MSTRG.3874	NAT-lncRNA	III	NC_025993.1	59795950	59796335	-	LOC105061385	antisense-overlapped	antisense-overlapped	NC_025993.1	59793653	59797839	+	XP_019707212.1	PREDICTED: protein argonaute 2-like [Elaeis guineensis]
MSTRG.3875	NAT-lncRNA	II	NC_025993.1	59797528	59800849	-	LOC105061385	antisense-overlapped	antisense-overlapped	NC_025993.1	59793653	59797839	+	XP_019707212.1	PREDICTED: protein argonaute 2-like [Elaeis guineensis]
MSTRG.3934	NAT-lncRNA	I	NC_025993.1	60939856	60989949	+	LOC105032054	antisense-overlapped	not overlapped	NC_025993.1	60939545	60941642	-	pseudogene	uncharacterized LOC105032054
MSTRG.3934	NAT-lncRNA	IV	NC_025993.1	60939856	60989949	+	LOC105032062	antisense-overlapped	antisense-overlapped	NC_025993.1	60972735	60986235	-	XP_019708845.1	PREDICTED: uncharacterized protein LOC105032062 isoform X3 [Elaeis guineensis]
MSTRG.3934	NAT-lncRNA	II	NC_025993.1	60939856	60989949	+	LOC105032071	antisense-overlapped	antisense-overlapped	NC_025993.1	60989329	60991832	-	XP_010904720.1	PREDICTED: uncharacterized protein LOC105032071 isoform X1 [Elaeis guineensis]
MSTRG.4060	NAT-lncRNA	I	NC_025993.1	62266529	62267507	+	LOC105032700	antisense-overlapped	not overlapped	NC_025993.1	62262119	62266626	-	XP_010905518.1	PREDICTED: jasmonic acid-amido synthetase JAR1-like [Elaeis guineensis]
MSTRG.4063	NAT-lncRNA	III	NC_025993.1	62286109	62292971	-	LOC105032715	antisense-overlapped	not overlapped	NC_025993.1	62284972	62307919	+	XP_010905621.1	PREDICTED: uncharacterized protein LOC105032715 isoform X2 [Elaeis guineensis]
MSTRG.4389	NAT-lncRNA	III	NC_025994.1	2147558	2149199	+	LOC105034993	antisense-overlapped	not overlapped	NC_025994.1	2141642	2149414	-	XP_010908694.1	PREDICTED: BTB/POZ and TAZ domain-containing protein 3 isoform X2 [Elaeis guineensis]
MSTRG.4403	NAT-lncRNA	III	NC_025994.1	2447916	2451521	-	LOC105034901	antisense-overlapped	not overlapped	NC_025994.1	2440655	2453153	+	XP_010908526.1	PREDICTED: ankyrin repeat-containing protein At5g02620-like [Elaeis guineensis]
MSTRG.4483	NAT-lncRNA	III	NC_025994.1	3701722	3704962	+	LOC105036407	antisense-overlapped	antisense-overlapped	NC_025994.1	3698587	3736285	-	XP_010910485.1	PREDICTED: non-lysosomal glucosylceramidase isoform X1 [Elaeis guineensis]
MSTRG.4499	NAT-lncRNA	III	NC_025994.1	3928353	3991918	-	LOC105036523	antisense-overlapped	not overlapped	NC_025994.1	3905888	4023136	+	XP_010910589.1	PREDICTED: LOW QUALITY PROTEIN: DNA (cytosine-5)-methyltransferase 1B-like [Elaeis guineensis]
MSTRG.4533	NAT-lncRNA	III	NC_025994.1	4392366	4393663	+	LOC105036063	antisense-overlapped	not overlapped	NC_025994.1	4388859	4400699	-	XP_010910114.1	PREDICTED: uncharacterized protein LOC105036063 isoform X1 [Elaeis guineensis]
MSTRG.4544	NAT-lncRNA	II	NC_025994.1	4527751	4538161	+	LOC105037900	antisense-overlapped	not overlapped	NC_025994.1	4530985	4538680	-	XP_010911831.1	PREDICTED: amino acid permease 8 [Elaeis guineensis]
MSTRG.4560	NAT-lncRNA	III	NC_025994.1	4733207	4736951	-	LOC105037891	antisense-overlapped	not overlapped	NC_025994.1	4712653	4758089	+	XP_010911815.1	PREDICTED: ran-binding protein 10 isoform X1 [Elaeis guineensis]
MSTRG.4684	NAT-lncRNA	III	NC_025994.1	6837380	6837850	-	LOC105037249	antisense-overlapped	not overlapped	NC_025994.1	6832375	6857744	+	XP_010911241.1	PREDICTED: LOW QUALITY PROTEIN: ubinuclein-1 [Elaeis guineensis]
MSTRG.4697	NAT-lncRNA	III	NC_025994.1	7041403	7041709	-	LOC105037157	antisense-overlapped	antisense-overlapped	NC_025994.1	7022274	7042198	+	XP_010911156.1	PREDICTED: PHD finger protein EHD3-like [Elaeis guineensis]
MSTRG.4762	NAT-lncRNA	III	NC_025994.1	8276134	8278055	+	LOC105036608	antisense-overlapped	not overlapped	NC_025994.1	8269715	8281814	-	XP_010910665.1	PREDICTED: receptor homology region, transmembrane domain- and RING domain-containing protein 1 [Elaeis guineensis]
MSTRG.4816	NAT-lncRNA	I	NC_025994.1	10654075	10956603	+	LOC105038073	antisense-overlapped	antisense-overlapped	NC_025994.1	10653869	10654570	-	XP_019703708.1	PREDICTED: uncharacterized protein LOC105038073 [Elaeis guineensis]
MSTRG.4816	NAT-lncRNA	IV	NC_025994.1	10654075	10956603	+	LOC105037972	antisense-overlapped	antisense-overlapped	NC_025994.1	10690120	10691092	-	XP_019703890.1	PREDICTED: probable disease resistance protein RPP1 [Elaeis guineensis]
MSTRG.4816	NAT-lncRNA	IV	NC_025994.1	10654075	10956603	+	LOC109505455	antisense-overlapped	not overlapped	NC_025994.1	10691064	10693413	-	XP_019703709.1	PREDICTED: putative disease resistance protein RGA1 [Elaeis guineensis]
MSTRG.4816	NAT-lncRNA	IV	NC_025994.1	10654075	10956603	+	LOC105037973	antisense-overlapped	antisense-overlapped	NC_025994.1	10792938	10796699	-	XP_010911917.1	PREDICTED: putative disease resistance protein RGA3 [Elaeis guineensis]
MSTRG.4816	NAT-lncRNA	IV	NC_025994.1	10654075	10956603	+	LOC105038074	antisense-overlapped	not overlapped	NC_025994.1	10842619	10843493	-	pseudogene	uncharacterized LOC105038074
MSTRG.4816	NAT-lncRNA	IV	NC_025994.1	10654075	10956603	+	LOC105038075	antisense-overlapped	not overlapped	NC_025994.1	10843610	10845928	-	XP_010912067.1	PREDICTED: putative disease resistance protein RGA3 [Elaeis guineensis]
MSTRG.4816	NAT-lncRNA	II	NC_025994.1	10654075	10956603	+	LOC105037974	antisense-overlapped	antisense-overlapped	NC_025994.1	10955725	10959602	-	XP_010911918.1	PREDICTED: putative disease resistance protein RGA4 [Elaeis guineensis]
MSTRG.4914	NAT-lncRNA	III	NC_025994.1	13332632	13333597	-	LOC105038026	antisense-overlapped	not overlapped	NC_025994.1	13328631	13354110	+	XP_010912004.2	PREDICTED: LOW QUALITY PROTEIN: sterol 3-beta-glucosyltransferase UGT80B1 [Elaeis guineensis]
MSTRG.5026	NAT-lncRNA	III	NC_025994.1	16067783	16076887	+	LOC105038107	antisense-overlapped	not overlapped	NC_025994.1	16039652	16079021	-	XP_010912097.1	PREDICTED: sugar transporter ERD6-like 5 isoform X1 [Elaeis guineensis]
MSTRG.5028	NAT-lncRNA	III	NC_025994.1	16088355	16089096	+	LOC105038105	antisense-overlapped	antisense-overlapped	NC_025994.1	16083529	16091307	-	XP_019704001.1	PREDICTED: sugar transporter ERD6-like 16 isoform X2 [Elaeis guineensis]
MSTRG.5165	NAT-lncRNA	III	NC_025994.1	20060114	20065969	+	LOC105038176	antisense-overlapped	not overlapped	NC_025994.1	20059282	20066427	-	XP_010912191.1	PREDICTED: small nuclear ribonucleoprotein Sm D1 [Elaeis guineensis]
MSTRG.5276	NAT-lncRNA	III	NC_025994.1	21909210	21911875	+	LOC105038239	antisense-overlapped	not overlapped	NC_025994.1	21905616	21914882	-	XP_019704078.1	PREDICTED: pentatricopeptide repeat-containing protein At1g22960, mitochondrial [Elaeis guineensis]
MSTRG.5289	NAT-lncRNA	III	NC_025994.1	22090346	22091177	-	LOC105038248	antisense-overlapped	not overlapped	NC_025994.1	22087572	22094010	+	XP_010912291.1	PREDICTED: cell division protein FtsZ homolog 2-2, chloroplastic [Elaeis guineensis]
MSTRG.5557	NAT-lncRNA	IV	NC_025994.1	26099212	26114360	-	LOC105038466	antisense-overlapped	not overlapped	NC_025994.1	26100959	26103423	+	XP_010912574.1	PREDICTED: amino acid permease 3 [Elaeis guineensis]
MSTRG.5593	NAT-lncRNA	III	NC_025994.1	26585578	26585949	+	LOC105038490	antisense-overlapped	antisense-overlapped	NC_025994.1	26585450	26599062	-	XP_010912605.2	PREDICTED: small RNA degrading nuclease 5 [Elaeis guineensis]
MSTRG.5603	NAT-lncRNA	III	NC_025994.1	26726996	26727660	+	LOC105038500	antisense-overlapped	not overlapped	NC_025994.1	26724942	26750157	-	XP_010912624.1	PREDICTED: phosphatidylinositol 4-kinase beta 1-like isoform X1 [Elaeis guineensis]
MSTRG.5607	NAT-lncRNA	IV	NC_025994.1	26823483	26844470	+	LOC105038502	antisense-overlapped	antisense-overlapped	NC_025994.1	26832301	26841761	-	XP_019703883.1	PREDICTED: alcohol dehydrogenase 3-like [Elaeis guineensis]
MSTRG.5607	NAT-lncRNA	I	NC_025994.1	26823483	26844470	+	LOC105038504	antisense-overlapped	antisense-overlapped	NC_025994.1	26823283	26828211	-	XP_010912629.1	PREDICTED: alcohol dehydrogenase 3-like [Elaeis guineensis]
MSTRG.5607	NAT-lncRNA	II	NC_025994.1	26823483	26844470	+	LOC105038505	antisense-overlapped	antisense-overlapped	NC_025994.1	26843793	26847977	-	XP_010912630.1	PREDICTED: alcohol dehydrogenase 1 [Elaeis guineensis]
MSTRG.5756	NAT-lncRNA	I	NC_025994.1	29178284	29179661	+	LOC105038595	antisense-overlapped	antisense-overlapped	NC_025994.1	29177705	29178458	-	XP_010912746.1	PREDICTED: preprotein translocase subunit SECE1 [Elaeis guineensis]
MSTRG.6148	NAT-lncRNA	III	NC_025994.1	37418330	37422114	+	LOC105038883	antisense-overlapped	not overlapped	NC_025994.1	37415439	37434282	-	XP_010913105.1	PREDICTED: U1 small nuclear ribonucleoprotein C [Elaeis guineensis]
MSTRG.6481	NAT-lncRNA	III	NC_025994.1	43561088	43561545	-	LOC105039122	antisense-overlapped	not overlapped	NC_025994.1	43559243	43567293	+	XP_010913432.1	PREDICTED: uncharacterized protein LOC105039122 [Elaeis guineensis]
MSTRG.6536	NAT-lncRNA	III	NC_025994.1	44252333	44252661	+	LOC105039390	antisense-overlapped	antisense-overlapped	NC_025994.1	44251401	44337345	-	XP_019703741.1	PREDICTED: LOW QUALITY PROTEIN: nuclear-pore anchor-like [Elaeis guineensis]
MSTRG.6593	NAT-lncRNA	III	NC_025994.1	44806987	44809227	+	LOC105039183	antisense-overlapped	not overlapped	NC_025994.1	44806269	44827732	-	XP_019702825.1	PREDICTED: CST complex subunit CTC1 isoform X2 [Elaeis guineensis]
MSTRG.6695	NAT-lncRNA	III	NC_025994.1	46233099	46235036	-	LOC105039238	antisense-overlapped	not overlapped	NC_025994.1	46227977	46241068	+	XP_010913618.1	PREDICTED: histidine kinase 5-like [Elaeis guineensis]
MSTRG.6852	NAT-lncRNA	II	NC_025994.1	48397446	48401722	-	LOC105039327	antisense-overlapped	antisense-overlapped	NC_025994.1	48392163	48401689	+	XP_010913748.1	PREDICTED: 30S ribosomal protein S16-2, chloroplastic/mitochondrial isoform X2 [Elaeis guineensis]
MSTRG.6895	NAT-lncRNA	III	NC_025994.1	49164200	49164517	+	LOC105039418	antisense-overlapped	antisense-overlapped	NC_025994.1	49161213	49167041	-	XP_010913853.1	PREDICTED: U-box domain-containing protein 35-like [Elaeis guineensis]
MSTRG.7354	NAT-lncRNA	III	NC_025994.1	56042793	56047879	-	LOC105039697	antisense-overlapped	not overlapped	NC_025994.1	56041556	56059712	+	XP_010914251.1	PREDICTED: uncharacterized protein LOC105039697 [Elaeis guineensis]
MSTRG.7370	NAT-lncRNA	III	NC_025994.1	56394454	56394768	+	LOC105039707	antisense-overlapped	antisense-overlapped	NC_025994.1	56393984	56394820	-	XP_010914263.1	PREDICTED: 36.4 kDa proline-rich protein [Elaeis guineensis]
MSTRG.7396	NAT-lncRNA	IV	NC_025994.1	56756531	56835337	+	LOC105039758	antisense-overlapped	not overlapped	NC_025994.1	56763682	56765438	-	XP_010914319.1	PREDICTED: protein ECERIFERUM 26-like [Elaeis guineensis]
MSTRG.7396	NAT-lncRNA	IV	NC_025994.1	56756531	56835337	+	LOC105039825	antisense-overlapped	not overlapped	NC_025994.1	56792650	56793528	-	pseudogene	protein ECERIFERUM 26-like
MSTRG.7703	NAT-lncRNA	I	NC_025994.1	61410496	61430625	+	LOC105039969	antisense-overlapped	antisense-overlapped	NC_025994.1	61401297	61412102	-	XP_010914614.1	PREDICTED: cell division cycle 5-like protein [Elaeis guineensis]
MSTRG.7703	NAT-lncRNA	II	NC_025994.1	61410496	61430625	+	LOC105039972	antisense-overlapped	antisense-overlapped	NC_025994.1	61422309	61431971	-	XP_010914622.1	PREDICTED: cell division cycle 5-like protein [Elaeis guineensis]
MSTRG.7838	NAT-lncRNA	III	NC_025994.1	63906248	63907660	+	LOC105040085	antisense-overlapped	antisense-overlapped	NC_025994.1	63892151	63907727	-	XP_010914761.1	PREDICTED: ABC transporter G family member 41-like [Elaeis guineensis]
MSTRG.7841	NAT-lncRNA	III	NC_025994.1	63925102	63925486	+	LOC105040086	antisense-overlapped	antisense-overlapped	NC_025994.1	63911343	63925669	-	XP_019704144.1	PREDICTED: pleiotropic drug resistance protein 3-like [Elaeis guineensis]
MSTRG.7861	NAT-lncRNA	III	NC_025994.1	64164313	64166274	-	LOC105040096	antisense-overlapped	not overlapped	NC_025994.1	64156125	64167800	+	XP_010914777.1	PREDICTED: suppressor of mec-8 and unc-52 protein homolog 1 [Elaeis guineensis]
MSTRG.7886	NAT-lncRNA	II	NC_025994.1	64505966	64512219	+	LOC105040112	antisense-overlapped	antisense-overlapped	NC_025994.1	64511837	64513721	-	XP_010914795.1	PREDICTED: auxin-responsive protein IAA31 isoform X2 [Elaeis guineensis]
MSTRG.7902	NAT-lncRNA	I	NC_025994.1	64663702	64670684	+	LOC105040120	antisense-overlapped	antisense-overlapped	NC_025994.1	64658227	64664092	-	XP_010914805.1	PREDICTED: pectin acetylesterase 10-like [Elaeis guineensis]
MSTRG.7902	NAT-lncRNA	II	NC_025994.1	64663702	64670684	+	LOC105040119	antisense-overlapped	antisense-overlapped	NC_025994.1	64665615	64670827	-	XP_010914803.1	PREDICTED: pectin acetylesterase 10 isoform X1 [Elaeis guineensis]
MSTRG.7968	NAT-lncRNA	II	NC_025995.1	269440	270321	+	LOC105040167	antisense-overlapped	not overlapped	NC_025995.1	269942	274797	-	pseudogene	chaperone protein dnaJ 49-like
MSTRG.7982	NAT-lncRNA	III	NC_025995.1	386058	386352	+	LOC105040175	antisense-overlapped	antisense-overlapped	NC_025995.1	385144	394890	-	XP_019704459.1	PREDICTED: uncharacterized protein LOC105040175 isoform X1 [Elaeis guineensis]
MSTRG.8018	NAT-lncRNA	III	NC_025995.1	812796	813513	+	LOC105040198	antisense-overlapped	not overlapped	NC_025995.1	807354	825837	-	XP_010914920.1	PREDICTED: peptidyl-prolyl cis-trans isomerase CYP95 isoform X1 [Elaeis guineensis]
MSTRG.8102	NAT-lncRNA	III	NC_025995.1	2045291	2045676	+	LOC105040268	antisense-overlapped	antisense-overlapped	NC_025995.1	2045202	2046993	-	XP_010915027.1	PREDICTED: F-box/kelch-repeat protein At1g80440-like [Elaeis guineensis]
MSTRG.8109	NAT-lncRNA	III	NC_025995.1	2150546	2151544	+	LOC105040272	antisense-overlapped	not overlapped	NC_025995.1	2143260	2164551	-	XP_010915030.1	PREDICTED: 3-hydroxyisobutyryl-CoA hydrolase-like protein 3, mitochondrial isoform X2 [Elaeis guineensis]
MSTRG.8192	NAT-lncRNA	III	NC_025995.1	3343145	3347002	+	LOC105040320	antisense-overlapped	antisense-overlapped	NC_025995.1	3334837	3347002	-	XP_010915109.1	PREDICTED: uncharacterized protein LOC105040320 isoform X2 [Elaeis guineensis]
MSTRG.8324	NAT-lncRNA	III	NC_025995.1	5380091	5382501	-	LOC105040426	antisense-overlapped	not overlapped	NC_025995.1	5371726	5386989	+	XP_019705104.1	PREDICTED: ent-kaurene oxidase 2 isoform X2 [Elaeis guineensis]
MSTRG.8477	NAT-lncRNA	II	NC_025995.1	7385998	7393358	+	LOC105040532	antisense-overlapped	antisense-overlapped	NC_025995.1	7392806	7393821	-	XP_010915396.1	PREDICTED: uncharacterized protein LOC105040532 [Elaeis guineensis]
MSTRG.8560	NAT-lncRNA	I	NC_025995.1	8510915	8515553	+	LOC105041468	antisense-overlapped	antisense-overlapped	NC_025995.1	8509863	8511043	-	XP_010916741.2	PREDICTED: transcription repressor OFP7-like [Elaeis guineensis]
MSTRG.8627	NAT-lncRNA	II	NC_025995.1	9317101	9324291	+	LOC105040621	antisense-overlapped	not overlapped	NC_025995.1	9324289	9350552	-	XP_019705019.1	PREDICTED: polyadenylate-binding protein-interacting protein 9 isoform X1 [Elaeis guineensis]
MSTRG.8710	NAT-lncRNA	I	NC_025995.1	10310920	10311356	+	LOC105040667	antisense-overlapped	antisense-overlapped	NC_025995.1	10308974	10311063	-	XP_010915616.1	PREDICTED: embryonic protein DC-8 [Elaeis guineensis]
MSTRG.8771	NAT-lncRNA	II	NC_025995.1	11472372	11474870	+	LOC105040718	antisense-overlapped	antisense-overlapped	NC_025995.1	11474455	11478183	-	XP_010915676.1	PREDICTED: bidirectional sugar transporter SWEET3b [Elaeis guineensis]
MSTRG.8818	NAT-lncRNA	III	NC_025995.1	12209996	12210859	-	LOC105041500	antisense-overlapped	not overlapped	NC_025995.1	12198238	12216582	+	XP_019704678.1	PREDICTED: ABC transporter C family member 10-like [Elaeis guineensis]
MSTRG.8873	NAT-lncRNA	III	NC_025995.1	12946168	12947422	+	LOC105040795	antisense-overlapped	antisense-overlapped	NC_025995.1	12944667	12952060	-	XP_010915792.1	PREDICTED: uncharacterized protein LOC105040795 isoform X1 [Elaeis guineensis]
MSTRG.9232	NAT-lncRNA	II	NC_025995.1	17388673	17411346	-	LOC105041048	antisense-overlapped	not overlapped	NC_025995.1	17378227	17405003	+	XP_010916144.1	PREDICTED: MADS-box transcription factor 23-like isoform X3 [Elaeis guineensis]
MSTRG.9364	NAT-lncRNA	III	NC_025995.1	19215266	19216005	+	LOC105041135	antisense-overlapped	antisense-overlapped	NC_025995.1	19214265	19216434	-	XP_010916267.2	PREDICTED: protein O-linked-mannose beta-1,4-N-acetylglucosaminyltransferase 2-like [Elaeis guineensis]
MSTRG.9422	NAT-lncRNA	III	NC_025995.1	19814258	19822127	-	LOC105041176	antisense-overlapped	not overlapped	NC_025995.1	19813211	19823852	+	XP_010916335.1	PREDICTED: beta-glucuronosyltransferase GlcAT14A [Elaeis guineensis]
MSTRG.9486	NAT-lncRNA	III	NC_025995.1	20768047	20770375	+	LOC105041219	antisense-overlapped	not overlapped	NC_025995.1	20757113	20775574	-	XP_010916388.1	PREDICTED: uncharacterized protein LOC105041219 [Elaeis guineensis]
MSTRG.9572	NAT-lncRNA	III	NC_025995.1	21810543	21810844	+	LOC105041276	antisense-overlapped	antisense-overlapped	NC_025995.1	21810276	21811124	-	XP_010916473.1	PREDICTED: 60S ribosomal protein L26-2-like [Elaeis guineensis]
MSTRG.9637	NAT-lncRNA	III	NC_025995.1	23034324	23041147	+	LOC105041327	antisense-overlapped	not overlapped	NC_025995.1	23027849	23043615	-	XP_010916555.1	PREDICTED: uncharacterized protein LOC105041327 [Elaeis guineensis]
MSTRG.9962	NAT-lncRNA	I	NC_025995.1	27423823	27548876	+	LOC105041672	antisense-overlapped	not overlapped	NC_025995.1	27408684	27430294	-	XP_010916964.1	PREDICTED: laccase-14-like [Elaeis guineensis]
MSTRG.9962	NAT-lncRNA	I	NC_025995.1	27423823	27548876	+	LOC105041670	antisense-overlapped	not overlapped	NC_025995.1	27408769	27426817	-	XP_019704730.1	PREDICTED: uncharacterized protein LOC105041670 isoform X7 [Elaeis guineensis]
MSTRG.9962	NAT-lncRNA	IV	NC_025995.1	27423823	27548876	+	LOC105041674	antisense-overlapped	not overlapped	NC_025995.1	27486270	27497764	-	XP_019704722.1	PREDICTED: laccase-14-like [Elaeis guineensis]
MSTRG.9962	NAT-lncRNA	IV	NC_025995.1	27423823	27548876	+	LOC109505633	antisense-overlapped	not overlapped	NC_025995.1	27505903	27506512	-	XP_019704732.1	PREDICTED: 4-alpha-glucanotransferase DPE1, chloroplastic/amyloplastic-like [Elaeis guineensis]
MSTRG.9962	NAT-lncRNA	II	NC_025995.1	27423823	27548876	+	LOC105041676	antisense-overlapped	not overlapped	NC_025995.1	27545779	27563049	-	XP_019704724.1	PREDICTED: 4-alpha-glucanotransferase DPE1, chloroplastic/amyloplastic isoform X3 [Elaeis guineensis]
MSTRG.10011	NAT-lncRNA	II	NC_025995.1	28270338	28272014	+	LOC105041712	antisense-overlapped	antisense-overlapped	NC_025995.1	28271885	28282411	-	XP_019704530.1	PREDICTED: peptidyl-prolyl cis-trans isomerase CYP23 isoform X2 [Elaeis guineensis]
MSTRG.10064	NAT-lncRNA	II	NC_025995.1	29146008	29152372	-	LOC105041743	antisense-overlapped	not overlapped	NC_025995.1	29145193	29146009	+	XP_010917060.1	PREDICTED: uncharacterized protein LOC105041743 [Elaeis guineensis]
MSTRG.10122	NAT-lncRNA	III	NC_025995.1	30363559	30363905	+	LOC105041814	antisense-overlapped	antisense-overlapped	NC_025995.1	30362843	30363990	-	XP_019704493.1	PREDICTED: omega-amidase, chloroplastic-like isoform X4 [Elaeis guineensis]
MSTRG.10328	NAT-lncRNA	III	NC_025995.1	36084012	36088068	-	LOC105041936	antisense-overlapped	not overlapped	NC_025995.1	36080887	36088959	+	XP_010917314.1	PREDICTED: polyadenylate-binding protein 2 isoform X1 [Elaeis guineensis]
MSTRG.10334	NAT-lncRNA	I	NC_025995.1	36146592	36185744	+	LOC105041939	antisense-overlapped	antisense-overlapped	NC_025995.1	36145857	36147649	-	XP_019704990.1	PREDICTED: 7-deoxyloganetin glucosyltransferase-like [Elaeis guineensis]
MSTRG.10334	NAT-lncRNA	II	NC_025995.1	36146592	36185744	+	LOC105041940	antisense-overlapped	not overlapped	NC_025995.1	36184773	36186440	-	pseudogene	7-deoxyloganetin glucosyltransferase-like
MSTRG.10380	NAT-lncRNA	II	NC_025995.1	37157160	37200166	-	LOC105041973	antisense-overlapped	not overlapped	NC_025995.1	37157140	37166440	+	XP_010917355.1	PREDICTED: uncharacterized protein LOC105041973 [Elaeis guineensis]
MSTRG.10554	NAT-lncRNA	II	NC_025995.1	41450123	41450599	+	LOC105042102	antisense-overlapped	antisense-overlapped	NC_025995.1	41450308	41496947	-	XP_010917502.1	PREDICTED: uncharacterized protein LOC105042102 [Elaeis guineensis]
MSTRG.10593	NAT-lncRNA	II	NC_025995.1	42551034	42555328	-	LOC109505593	antisense-overlapped	not overlapped	NC_025995.1	42550372	42551037	+	XP_019704652.1	PREDICTED: uncharacterized protein LOC109505593 [Elaeis guineensis]
MSTRG.10670	NAT-lncRNA	III	NC_025995.1	44718610	44726323	-	LOC105042163	antisense-overlapped	not overlapped	NC_025995.1	44680723	44738728	+	XP_010917574.1	PREDICTED: phospholipid-transporting ATPase 3 [Elaeis guineensis]
MSTRG.10671	NAT-lncRNA	III	NC_025995.1	44726405	44730444	-	LOC105042163	antisense-overlapped	not overlapped	NC_025995.1	44680723	44738728	+	XP_010917574.1	PREDICTED: phospholipid-transporting ATPase 3 [Elaeis guineensis]
MSTRG.10803	NAT-lncRNA	III	NC_025995.1	48223223	48223906	-	LOC105042208	antisense-overlapped	not overlapped	NC_025995.1	48212984	48224527	+	XP_010917632.1	PREDICTED: ADP-ribosylation factor-like protein 5 [Elaeis guineensis]
MSTRG.10818	NAT-lncRNA	III	NC_025995.1	48858750	48872189	-	LOC105042205	antisense-overlapped	not overlapped	NC_025995.1	48849474	48873244	+	XP_019705169.1	PREDICTED: protein argonaute 10-like isoform X1 [Elaeis guineensis]
MSTRG.10941	NAT-lncRNA	III	NC_025995.1	52684163	52686064	+	LOC105042335	antisense-overlapped	not overlapped	NC_025995.1	52681929	52686649	-	XP_010917798.1	PREDICTED: LOW QUALITY PROTEIN: protein ECERIFERUM 26-like [Elaeis guineensis]
MSTRG.10950	NAT-lncRNA	I	NC_025995.1	52961425	52962866	-	LOC105042331	antisense-overlapped	antisense-overlapped	NC_025995.1	52962797	52965957	+	XP_010917795.1	PREDICTED: protein IQ-DOMAIN 14-like [Elaeis guineensis]
MSTRG.10957	NAT-lncRNA	II	NC_025995.1	53116163	53167989	-	LOC105042328	antisense-overlapped	not overlapped	NC_025995.1	53113307	53121241	+	XP_010917792.1	PREDICTED: sulfate transporter 3.1 [Elaeis guineensis]
MSTRG.11019	NAT-lncRNA	III	NC_025995.1	54754206	54756701	+	LOC105042309	antisense-overlapped	not overlapped	NC_025995.1	54752614	54773963	-	XP_019705205.1	PREDICTED: tRNA (guanine-N(7)-)-methyltransferase non-catalytic subunit WDR4 isoform X2 [Elaeis guineensis]
MSTRG.11061	NAT-lncRNA	III	NC_025995.1	55627306	55629858	-	LOC105042286	antisense-overlapped	antisense-overlapped	NC_025995.1	55618853	55630118	+	XP_010917722.2	PREDICTED: myosin-12 isoform X1 [Elaeis guineensis]
MSTRG.11069	NAT-lncRNA	III	NC_025995.1	55738177	55738572	+	LOC105042281	antisense-overlapped	antisense-overlapped	NC_025995.1	55735832	55741377	-	XP_019704365.1	PREDICTED: putative disease resistance protein RGA1 [Elaeis guineensis]
MSTRG.11109	NAT-lncRNA	III	NC_025995.1	56764259	56764623	+	LOC105042340	antisense-overlapped	antisense-overlapped	NC_025995.1	56753266	56768361	-	XP_019704647.1	PREDICTED: putative disease resistance protein RGA3 [Elaeis guineensis]
MSTRG.11128	NAT-lncRNA	I	NC_025995.1	57160123	57163812	-	LOC105042423	antisense-overlapped	antisense-overlapped	NC_025995.1	57163266	57166967	+	XP_010917926.1	PREDICTED: uncharacterized protein LOC105042423 [Elaeis guineensis]
MSTRG.11156	NAT-lncRNA	II	NC_025995.1	57776320	57793714	-	LOC105042388	antisense-overlapped	not overlapped	NC_025995.1	57774435	57784271	+	pseudogene	beta-glucosidase BoGH3B-like
MSTRG.11163	NAT-lncRNA	III	NC_025995.1	57991094	57997244	+	LOC105042392	antisense-overlapped	not overlapped	NC_025995.1	57984053	58010562	-	XP_019704559.1	PREDICTED: probable glycosyltransferase At5g03795 [Elaeis guineensis]
MSTRG.11331	NAT-lncRNA	I	NC_025996.1	2276108	2703052	+	LOC105042484	antisense-overlapped	antisense-overlapped	NC_025996.1	2274168	2276468	-	XP_019705424.1	PREDICTED: putative disease resistance protein RGA3 [Elaeis guineensis]
MSTRG.11331	NAT-lncRNA	IV	NC_025996.1	2276108	2703052	+	LOC105042486	antisense-overlapped	antisense-overlapped	NC_025996.1	2530069	2535425	-	XP_010918020.1	PREDICTED: putative disease resistance protein RGA3 [Elaeis guineensis]
MSTRG.11331	NAT-lncRNA	IV	NC_025996.1	2276108	2703052	+	LOC105042487	antisense-overlapped	not overlapped	NC_025996.1	2588209	2593551	-	XP_010918021.1	PREDICTED: putative disease resistance protein RGA1 [Elaeis guineensis]
MSTRG.11331	NAT-lncRNA	IV	NC_025996.1	2276108	2703052	+	LOC105042488	antisense-overlapped	not overlapped	NC_025996.1	2648443	2655490	-	XP_019705631.1	PREDICTED: putative disease resistance protein RGA3 isoform X2 [Elaeis guineensis]
MSTRG.11331	NAT-lncRNA	IV	NC_025996.1	2276108	2703052	+	LOC105042480	antisense-overlapped	not overlapped	NC_025996.1	2691759	2695347	-	XP_010918015.1	PREDICTED: putative disease resistance protein RGA1 [Elaeis guineensis]
MSTRG.11378	NAT-lncRNA	II	NC_025996.1	4073344	4164778	-	LOC105042510	antisense-overlapped	not overlapped	NC_025996.1	4060612	4079857	+	XP_010918065.1	PREDICTED: 3-isopropylmalate dehydratase large subunit, chloroplastic [Elaeis guineensis]
MSTRG.11378	NAT-lncRNA	I	NC_025996.1	4073344	4164778	-	LOC105042511	antisense-overlapped	not overlapped	NC_025996.1	4134849	4171064	+	XP_010918067.2	PREDICTED: 3-isopropylmalate dehydratase large subunit, chloroplastic-like [Elaeis guineensis]
MSTRG.11517	NAT-lncRNA	III	NC_025996.1	7910343	7917372	+	LOC105042588	antisense-overlapped	not overlapped	NC_025996.1	7905412	7952635	-	XP_010918180.1	PREDICTED: putative tRNA pseudouridine synthase Pus10 isoform X2 [Elaeis guineensis]
MSTRG.11590	NAT-lncRNA	III	NC_025996.1	10375509	10379586	+	LOC105042658	antisense-overlapped	not overlapped	NC_025996.1	10348922	10513375	-	XP_010918252.2	PREDICTED: Niemann-Pick C1 protein-like isoform X3 [Elaeis guineensis]
MSTRG.11624	NAT-lncRNA	I	NC_025996.1	11523192	11523648	-	LOC105042673	antisense-overlapped	antisense-overlapped	NC_025996.1	11523328	11525947	+	XP_010918273.1	PREDICTED: L-type lectin-domain containing receptor kinase IV.2-like [Elaeis guineensis]
MSTRG.11762	NAT-lncRNA	II	NC_025996.1	16594957	16596321	-	LOC105042744	antisense-overlapped	antisense-overlapped	NC_025996.1	16591007	16595039	+	XP_010918346.1	PREDICTED: protein PIN-LIKES 7 [Elaeis guineensis]
MSTRG.11876	NAT-lncRNA	II	NC_025996.1	20933280	20934288	-	LOC105042795	antisense-overlapped	antisense-overlapped	NC_025996.1	20927765	20933510	+	XP_010918416.2	PREDICTED: F-box/LRR-repeat protein 4 [Elaeis guineensis]
MSTRG.11940	NAT-lncRNA	III	NC_025996.1	22880756	22888501	+	LOC105042830	antisense-overlapped	not overlapped	NC_025996.1	22864147	22889113	-	XP_010918468.1	PREDICTED: E3 ubiquitin-protein ligase Hakai-like isoform X1 [Elaeis guineensis]
MSTRG.12021	NAT-lncRNA	III	NC_025996.1	25373833	25375167	+	LOC105042882	antisense-overlapped	not overlapped	NC_025996.1	25320207	25419112	-	XP_010918543.1	PREDICTED: tripeptidyl-peptidase 2 [Elaeis guineensis]
MSTRG.12022	NAT-lncRNA	III	NC_025996.1	25401373	25403733	+	LOC105042882	antisense-overlapped	not overlapped	NC_025996.1	25320207	25419112	-	XP_010918543.1	PREDICTED: tripeptidyl-peptidase 2 [Elaeis guineensis]
MSTRG.12042	NAT-lncRNA	III	NC_025996.1	26004399	26007508	+	LOC105042903	antisense-overlapped	antisense-overlapped	NC_025996.1	25996743	26008678	-	XP_019705666.1	PREDICTED: uncharacterized protein LOC105042903 [Elaeis guineensis]
MSTRG.12125	NAT-lncRNA	III	NC_025996.1	27970906	27971221	+	LOC105042969	antisense-overlapped	antisense-overlapped	NC_025996.1	27970671	27975344	-	XP_010918655.1	PREDICTED: ABC transporter G family member 14-like [Elaeis guineensis]
MSTRG.12138	NAT-lncRNA	III	NC_025996.1	28559681	28561704	+	LOC109505726	antisense-overlapped	not overlapped	NC_025996.1	28539820	28568286	-	XP_019705384.1	PREDICTED: uncharacterized protein LOC109505726 [Elaeis guineensis]
MSTRG.12359	NAT-lncRNA	III	NC_025996.1	33728833	33729177	+	LOC105043139	antisense-overlapped	antisense-overlapped	NC_025996.1	33727487	33729262	-	XP_010918857.1	PREDICTED: UDP-glycosyltransferase 92A1-like [Elaeis guineensis]
MSTRG.12377	NAT-lncRNA	III	NC_025996.1	33950257	33951577	+	LOC105043129	antisense-overlapped	not overlapped	NC_025996.1	33949724	33956175	-	XP_010918847.1	PREDICTED: probable leucine-rich repeat receptor-like protein kinase At5g63930 [Elaeis guineensis]
MSTRG.12387	NAT-lncRNA	III	NC_025996.1	34233028	34233986	+	LOC105043124	antisense-overlapped	not overlapped	NC_025996.1	34142740	34244347	-	XP_010918844.1	PREDICTED: DNA mismatch repair protein MSH1, mitochondrial isoform X1 [Elaeis guineensis]
MSTRG.12756	NAT-lncRNA	III	NC_025996.1	40006449	40007903	+	LOC105043404	antisense-overlapped	not overlapped	NC_025996.1	39999433	40009711	-	XP_010919238.1	PREDICTED: uncharacterized protein LOC105043404 isoform X2 [Elaeis guineensis]
MSTRG.12826	NAT-lncRNA	III	NC_025996.1	41233776	41234087	-	LOC105043458	antisense-overlapped	not overlapped	NC_025996.1	41233598	41247281	+	XP_010919308.1	PREDICTED: RNA-binding protein 1 isoform X1 [Elaeis guineensis]
MSTRG.12869	NAT-lncRNA	II	NC_025996.1	41706805	41710679	+	LOC105043487	antisense-overlapped	not overlapped	NC_025996.1	41710679	41711883	-	XP_010919351.1	PREDICTED: homeobox-leucine zipper protein HOX6-like [Elaeis guineensis]
MSTRG.12938	NAT-lncRNA	I	NC_025996.1	42690819	42693179	+	LOC105043526	antisense-overlapped	antisense-overlapped	NC_025996.1	42685699	42691087	-	XP_010919410.1	PREDICTED: probable methyltransferase PMT17 isoform X3 [Elaeis guineensis]
MSTRG.12975	NAT-lncRNA	III	NC_025996.1	43434143	43434526	+	LOC105043601	antisense-overlapped	antisense-overlapped	NC_025996.1	43434034	43441066	-	XP_010919491.1	PREDICTED: probable trehalose-phosphate phosphatase F [Elaeis guineensis]
MSTRG.13094	NAT-lncRNA	III	NC_025996.1	45011527	45014328	-	LOC105043674	antisense-overlapped	not overlapped	NC_025996.1	45009961	45015848	+	XP_010919618.1	PREDICTED: transcription factor GHD7-like [Elaeis guineensis]
MSTRG.13469	NAT-lncRNA	III	NC_025996.1	50099798	50102542	-	LOC105043970	antisense-overlapped	not overlapped	NC_025996.1	50095026	50107186	+	XP_010920029.2	PREDICTED: DEAD-box ATP-dependent RNA helicase 5 [Elaeis guineensis]
MSTRG.13525	NAT-lncRNA	II	NC_025996.1	50670571	50710734	-	LOC105044006	antisense-overlapped	antisense-overlapped	NC_025996.1	50661988	50680665	+	XP_019705474.1	PREDICTED: wall-associated receptor kinase 2-like [Elaeis guineensis]
MSTRG.13525	NAT-lncRNA	I	NC_025996.1	50670571	50710734	-	LOC105044008	antisense-overlapped	antisense-overlapped	NC_025996.1	50710567	50718088	+	XP_010920076.1	PREDICTED: wall-associated receptor kinase 5-like [Elaeis guineensis]
MSTRG.13612	NAT-lncRNA	II	NC_025996.1	52086294	52086695	-	LOC105044072	antisense-overlapped	antisense-overlapped	NC_025996.1	52083848	52086451	+	XP_010920170.1	PREDICTED: trans-resveratrol di-O-methyltransferase-like [Elaeis guineensis]
MSTRG.13617	NAT-lncRNA	III	NC_025996.1	52217618	52235246	-	LOC105044073	antisense-overlapped	antisense-overlapped	NC_025996.1	52198637	52278212	+	XP_019705596.1	PREDICTED: trans-resveratrol di-O-methyltransferase-like isoform X1 [Elaeis guineensis]
MSTRG.13617	NAT-lncRNA	II	NC_025996.1	52217618	52235246	-	LOC105044117	antisense-overlapped	antisense-overlapped	NC_025996.1	52215139	52217953	+	XP_019705598.1	PREDICTED: trans-resveratrol di-O-methyltransferase-like [Elaeis guineensis]
MSTRG.13617	NAT-lncRNA	I	NC_025996.1	52217618	52235246	-	LOC105044074	antisense-overlapped	antisense-overlapped	NC_025996.1	52232087	52235295	+	XP_010920172.1	PREDICTED: trans-resveratrol di-O-methyltransferase-like [Elaeis guineensis]
MSTRG.13788	NAT-lncRNA	III	NC_025996.1	54789763	54790054	+	LOC105044208	antisense-overlapped	antisense-overlapped	NC_025996.1	54785203	54804060	-	XP_019705500.1	PREDICTED: tetratricopeptide repeat protein 7A isoform X1 [Elaeis guineensis]
MSTRG.13818	NAT-lncRNA	I	NC_025996.1	55312251	55374350	+	LOC105044226	antisense-overlapped	not overlapped	NC_025996.1	55311196	55314260	-	XP_010920354.1	PREDICTED: beta-glucosidase 18-like, partial [Elaeis guineensis]
MSTRG.13818	NAT-lncRNA	II	NC_025996.1	55312251	55374350	+	LOC105044265	antisense-overlapped	not overlapped	NC_025996.1	55366734	55375230	-	XP_010920385.2	PREDICTED: beta-glucosidase 18-like [Elaeis guineensis]
MSTRG.13825	NAT-lncRNA	III	NC_025996.1	55624607	55625404	+	LOC105044229	antisense-overlapped	not overlapped	NC_025996.1	55530914	55634454	-	XP_019705767.1	PREDICTED: beta-glucosidase 18 isoform X1 [Elaeis guineensis]
MSTRG.13832	NAT-lncRNA	I	NC_025996.1	55720465	55756610	-	LOC105044235	antisense-overlapped	not overlapped	NC_025996.1	55750372	55760730	+	XP_019705422.1	PREDICTED: uncharacterized protein LOC105044235 [Elaeis guineensis]
MSTRG.13880	NAT-lncRNA	III	NC_025996.1	56323462	56327500	+	LOC105044289	antisense-overlapped	not overlapped	NC_025996.1	56320009	56330392	-	XP_019705828.1	PREDICTED: uncharacterized protein LOC105044289 [Elaeis guineensis]
MSTRG.13883	NAT-lncRNA	III	NC_025996.1	56329071	56329558	+	LOC105044289	antisense-overlapped	antisense-overlapped	NC_025996.1	56320009	56330392	-	XP_019705828.1	PREDICTED: uncharacterized protein LOC105044289 [Elaeis guineensis]
MSTRG.14235	NAT-lncRNA	III	NC_025997.1	3318105	3318527	+	LOC105044672	antisense-overlapped	not overlapped	NC_025997.1	3317442	3326542	-	XP_010920951.1	PREDICTED: uncharacterized protein YKR070W [Elaeis guineensis]
MSTRG.14263	NAT-lncRNA	II	NC_025997.1	3652860	3658400	+	LOC105044651	antisense-overlapped	antisense-overlapped	NC_025997.1	3653292	3658719	-	XP_010920921.1	PREDICTED: phosphatidylinositol transfer protein 2-like [Elaeis guineensis]
MSTRG.14426	NAT-lncRNA	III	NC_025997.1	5631420	5632204	-	LOC105044733	antisense-overlapped	not overlapped	NC_025997.1	5630794	5633835	+	XP_010921023.1	PREDICTED: protein trichome birefringence-like 33 [Elaeis guineensis]
MSTRG.14615	NAT-lncRNA	IV	NC_025997.1	8376338	8393813	+	LOC105044864	antisense-overlapped	not overlapped	NC_025997.1	8377164	8384054	-	XP_010921210.1	PREDICTED: uncharacterized protein LOC105044864 isoform X2 [Elaeis guineensis]
MSTRG.14673	NAT-lncRNA	III	NC_025997.1	9229102	9230565	+	LOC105044902	antisense-overlapped	antisense-overlapped	NC_025997.1	9226596	9257805	-	XP_010921287.1	PREDICTED: guanine nucleotide exchange factor SPIKE 1 isoform X2 [Elaeis guineensis]
MSTRG.14713	NAT-lncRNA	IV	NC_025997.1	10024052	10040468	+	LOC105044933	antisense-overlapped	not overlapped	NC_025997.1	10030659	10031161	-	XP_010921339.1	PREDICTED: LOW QUALITY PROTEIN: uncharacterized protein LOC105044933 [Elaeis guineensis]
MSTRG.14744	NAT-lncRNA	II	NC_025997.1	10541614	10542888	-	LOC105044954	antisense-overlapped	antisense-overlapped	NC_025997.1	10529396	10541921	+	XP_010921365.1	PREDICTED: glucose-6-phosphate 1-dehydrogenase 4, chloroplastic [Elaeis guineensis]
MSTRG.15025	NAT-lncRNA	III	NC_025997.1	17397087	17397492	+	LOC105045190	antisense-overlapped	not overlapped	NC_025997.1	17396645	17397766	-	XP_010921668.1	PREDICTED: uncharacterized protein LOC105045190 [Elaeis guineensis]
MSTRG.15153	NAT-lncRNA	III	NC_025997.1	20736097	20741122	-	LOC105045252	antisense-overlapped	not overlapped	NC_025997.1	20724525	20747099	+	XP_010921774.1	PREDICTED: uncharacterized protein LOC105045252 [Elaeis guineensis]
MSTRG.15280	NAT-lncRNA	III	NC_025997.1	25014621	25014975	+	LOC105045319	antisense-overlapped	antisense-overlapped	NC_025997.1	25009986	25021944	-	XP_010921859.1	PREDICTED: uncharacterized protein LOC105045319 [Elaeis guineensis]
MSTRG.15557	NAT-lncRNA	III	NC_025997.1	33215036	33216228	+	LOC105045462	antisense-overlapped	not overlapped	NC_025997.1	33214681	33223077	-	XP_010922051.1	PREDICTED: 10 kDa chaperonin, mitochondrial [Elaeis guineensis]
MSTRG.15861	NAT-lncRNA	II	NC_025997.1	40134054	40143415	-	LOC105046219	antisense-overlapped	antisense-overlapped	NC_025997.1	40131997	40135494	+	XP_010923033.1	PREDICTED: uncharacterized protein LOC105046219 [Elaeis guineensis]
MSTRG.15864	NAT-lncRNA	III	NC_025997.1	40171385	40171714	-	LOC105046107	antisense-overlapped	antisense-overlapped	NC_025997.1	40169601	40173978	+	XP_010922911.1	PREDICTED: pentatricopeptide repeat-containing protein At2g02980, chloroplastic-like [Elaeis guineensis]
MSTRG.15957	NAT-lncRNA	I	NC_025997.1	41552898	41555185	-	LOC105046048	antisense-overlapped	antisense-overlapped	NC_025997.1	41554825	41564032	+	XP_010922836.1	PREDICTED: probable serine/threonine-protein kinase PBL8 [Elaeis guineensis]
MSTRG.15963	NAT-lncRNA	III	NC_025997.1	41700747	41703225	-	LOC105046043	antisense-overlapped	not overlapped	NC_025997.1	41696926	41704323	+	XP_010922829.1	PREDICTED: uncharacterized protein LOC105046043 [Elaeis guineensis]
MSTRG.15968	NAT-lncRNA	III	NC_025997.1	41734145	41734920	-	LOC105046041	antisense-overlapped	not overlapped	NC_025997.1	41729296	41739829	+	XP_010922826.1	PREDICTED: 2,3-bisphosphoglycerate-independent phosphoglycerate mutase [Elaeis guineensis]
MSTRG.16071	NAT-lncRNA	III	NC_025997.1	43158070	43158375	+	LOC105045973	antisense-overlapped	antisense-overlapped	NC_025997.1	43157248	43158403	-	XP_010922734.1	PREDICTED: non-specific lipid-transfer protein 1 [Elaeis guineensis]
MSTRG.16123	NAT-lncRNA	III	NC_025997.1	43849983	43851532	-	LOC105045939	antisense-overlapped	not overlapped	NC_025997.1	43847193	43853876	+	XP_010922686.1	PREDICTED: BTB/POZ domain-containing protein At1g01640 [Elaeis guineensis]
MSTRG.16214	NAT-lncRNA	III	NC_025997.1	45009382	45009715	-	LOC105045886	antisense-overlapped	antisense-overlapped	NC_025997.1	45009355	45013226	+	XP_010922618.1	PREDICTED: protein FLC EXPRESSOR [Elaeis guineensis]
MSTRG.16216	NAT-lncRNA	II	NC_025997.1	45020664	45028998	+	LOC105045885	antisense-overlapped	antisense-overlapped	NC_025997.1	45028285	45044857	-	XP_010922617.1	PREDICTED: transcription initiation factor TFIID subunit 15b [Elaeis guineensis]
MSTRG.16321	NAT-lncRNA	III	NC_025997.1	46488443	46488758	+	LOC105045817	antisense-overlapped	antisense-overlapped	NC_025997.1	46488368	46500749	-	XP_010922532.1	PREDICTED: elongation factor 1-alpha isoform X2 [Elaeis guineensis]
MSTRG.16341	NAT-lncRNA	I	NC_025997.1	46738008	46834052	+	LOC105045804	antisense-overlapped	not overlapped	NC_025997.1	46734432	46809803	-	XP_010922505.2	PREDICTED: pentatricopeptide repeat-containing protein At3g09650, chloroplastic-like [Elaeis guineensis]
MSTRG.16341	NAT-lncRNA	I	NC_025997.1	46738008	46834052	+	LOC105045801	antisense-overlapped	not overlapped	NC_025997.1	46737166	46743459	-	pseudogene	40S ribosomal protein S23-like
MSTRG.16341	NAT-lncRNA	IV	NC_025997.1	46738008	46834052	+	LOC105045802	antisense-overlapped	not overlapped	NC_025997.1	46775905	46794432	-	pseudogene	40S ribosomal protein S23-like
MSTRG.16341	NAT-lncRNA	IV	NC_025997.1	46738008	46834052	+	LOC105045803	antisense-overlapped	antisense-overlapped	NC_025997.1	46788996	46805026	-	XP_019706241.1	PREDICTED: pentatricopeptide repeat-containing protein At3g09650, chloroplastic-like [Elaeis guineensis]
MSTRG.16342	NAT-lncRNA	III	NC_025997.1	46738131	46793139	+	LOC105045804	antisense-overlapped	not overlapped	NC_025997.1	46734432	46809803	-	XP_010922505.2	PREDICTED: pentatricopeptide repeat-containing protein At3g09650, chloroplastic-like [Elaeis guineensis]
MSTRG.16342	NAT-lncRNA	I	NC_025997.1	46738131	46793139	+	LOC105045801	antisense-overlapped	not overlapped	NC_025997.1	46737166	46743459	-	pseudogene	40S ribosomal protein S23-like
MSTRG.16342	NAT-lncRNA	II	NC_025997.1	46738131	46793139	+	LOC105045802	antisense-overlapped	not overlapped	NC_025997.1	46775905	46794432	-	pseudogene	40S ribosomal protein S23-like
MSTRG.16342	NAT-lncRNA	II	NC_025997.1	46738131	46793139	+	LOC105045803	antisense-overlapped	antisense-overlapped	NC_025997.1	46788996	46805026	-	XP_019706241.1	PREDICTED: pentatricopeptide repeat-containing protein At3g09650, chloroplastic-like [Elaeis guineensis]
MSTRG.16344	NAT-lncRNA	I	NC_025997.1	46792855	46835887	+	LOC105045804	antisense-overlapped	not overlapped	NC_025997.1	46734432	46809803	-	XP_010922505.2	PREDICTED: pentatricopeptide repeat-containing protein At3g09650, chloroplastic-like [Elaeis guineensis]
MSTRG.16344	NAT-lncRNA	I	NC_025997.1	46792855	46835887	+	LOC105045802	antisense-overlapped	not overlapped	NC_025997.1	46775905	46794432	-	pseudogene	40S ribosomal protein S23-like
MSTRG.16344	NAT-lncRNA	I	NC_025997.1	46792855	46835887	+	LOC105045803	antisense-overlapped	antisense-overlapped	NC_025997.1	46788996	46805026	-	XP_019706241.1	PREDICTED: pentatricopeptide repeat-containing protein At3g09650, chloroplastic-like [Elaeis guineensis]
MSTRG.16345	NAT-lncRNA	III	NC_025997.1	46794298	46804271	+	LOC105045804	antisense-overlapped	not overlapped	NC_025997.1	46734432	46809803	-	XP_010922505.2	PREDICTED: pentatricopeptide repeat-containing protein At3g09650, chloroplastic-like [Elaeis guineensis]
MSTRG.16345	NAT-lncRNA	I	NC_025997.1	46794298	46804271	+	LOC105045802	antisense-overlapped	not overlapped	NC_025997.1	46775905	46794432	-	pseudogene	40S ribosomal protein S23-like
MSTRG.16345	NAT-lncRNA	III	NC_025997.1	46794298	46804271	+	LOC105045803	antisense-overlapped	antisense-overlapped	NC_025997.1	46788996	46805026	-	XP_019706241.1	PREDICTED: pentatricopeptide repeat-containing protein At3g09650, chloroplastic-like [Elaeis guineensis]
MSTRG.16355	NAT-lncRNA	II	NC_025997.1	46916376	46916926	-	LOC105045794	antisense-overlapped	antisense-overlapped	NC_025997.1	46906609	46916715	+	XP_010922499.1	PREDICTED: probable LRR receptor-like serine/threonine-protein kinase At1g67720 [Elaeis guineensis]
MSTRG.16368	NAT-lncRNA	III	NC_025997.1	47067348	47068355	-	LOC105045788	antisense-overlapped	not overlapped	NC_025997.1	47060753	47069027	+	XP_010922492.1	PREDICTED: probable trans-2-enoyl-CoA reductase, mitochondrial [Elaeis guineensis]
MSTRG.16567	NAT-lncRNA	III	NC_025997.1	49118330	49118691	-	LOC105045627	antisense-overlapped	not overlapped	NC_025997.1	49114669	49119560	+	XP_010922283.1	PREDICTED: uncharacterized protein LOC105045627 [Elaeis guineensis]
MSTRG.16580	NAT-lncRNA	II	NC_025997.1	49299931	49304061	-	LOC105046360	antisense-overlapped	antisense-overlapped	NC_025997.1	49292916	49301298	+	XP_019706244.1	PREDICTED: ultraviolet-B receptor UVR8-like isoform X1 [Elaeis guineensis]
MSTRG.16589	NAT-lncRNA	III	NC_025997.1	49421611	49422738	-	LOC105046352	antisense-overlapped	not overlapped	NC_025997.1	49418597	49426661	+	XP_010923219.2	PREDICTED: uncharacterized protein At2g39795, mitochondrial [Elaeis guineensis]
MSTRG.16594	NAT-lncRNA	I	NC_025997.1	49439811	49440369	-	LOC105046350	antisense-overlapped	antisense-overlapped	NC_025997.1	49440224	49446207	+	XP_010923216.1	PREDICTED: uracil phosphoribosyltransferase [Elaeis guineensis]
MSTRG.16595	NAT-lncRNA	III	NC_025997.1	49440564	49441194	-	LOC105046350	antisense-overlapped	not overlapped	NC_025997.1	49440224	49446207	+	XP_010923216.1	PREDICTED: uracil phosphoribosyltransferase [Elaeis guineensis]
MSTRG.16616	NAT-lncRNA	III	NC_025997.1	49671474	49671721	+	LOC105046331	antisense-overlapped	antisense-overlapped	NC_025997.1	49671360	49681511	-	XP_010923192.1	PREDICTED: universal stress protein PHOS32 [Elaeis guineensis]
MSTRG.16618	NAT-lncRNA	I	NC_025997.1	49704590	49705006	-	LOC105046330	antisense-overlapped	antisense-overlapped	NC_025997.1	49704888	49707085	+	XP_010923190.1	PREDICTED: uncharacterized protein LOC105046330 [Elaeis guineensis]
MSTRG.16625	NAT-lncRNA	III	NC_025997.1	49750582	49751137	+	LOC105046324	antisense-overlapped	not overlapped	NC_025997.1	49748215	49751781	-	XP_010923185.1	PREDICTED: 7-deoxyloganetic acid glucosyltransferase-like [Elaeis guineensis]
MSTRG.16997	NAT-lncRNA	II	NC_025998.1	3209368	3209817	-	LOC105046555	antisense-overlapped	antisense-overlapped	NC_025998.1	3203158	3209545	+	XP_010923476.1	PREDICTED: F-box/LRR-repeat protein 17 isoform X1 [Elaeis guineensis]
MSTRG.17004	NAT-lncRNA	III	NC_025998.1	3252628	3255053	-	LOC105046559	antisense-overlapped	not overlapped	NC_025998.1	3251302	3261343	+	XP_010923483.1	PREDICTED: NADH dehydrogenase [ubiquinone] flavoprotein 2, mitochondrial [Elaeis guineensis]
MSTRG.17067	NAT-lncRNA	II	NC_025998.1	4174601	4192838	+	LOC105046616	antisense-overlapped	not overlapped	NC_025998.1	4183452	4196229	-	XP_010923558.1	PREDICTED: transcription factor bHLH113-like isoform X2 [Elaeis guineensis]
MSTRG.17117	NAT-lncRNA	I	NC_025998.1	4962018	5088221	+	LOC105046642	antisense-overlapped	antisense-overlapped	NC_025998.1	4961428	4974587	-	XP_010923596.2	PREDICTED: uncharacterized protein LOC105046642 [Elaeis guineensis]
MSTRG.17117	NAT-lncRNA	IV	NC_025998.1	4962018	5088221	+	LOC105046690	antisense-overlapped	not overlapped	NC_025998.1	4991582	4992403	-	XP_010923650.2	PREDICTED: UDP-glycosyltransferase 83A1-like [Elaeis guineensis]
MSTRG.17117	NAT-lncRNA	IV	NC_025998.1	4962018	5088221	+	LOC105046644	antisense-overlapped	antisense-overlapped	NC_025998.1	4998032	4999413	-	XP_010923599.1	PREDICTED: UDP-glycosyltransferase 83A1-like [Elaeis guineensis]
MSTRG.17117	NAT-lncRNA	IV	NC_025998.1	4962018	5088221	+	LOC105046645	antisense-overlapped	antisense-overlapped	NC_025998.1	5017641	5019905	-	XP_010923600.1	PREDICTED: UDP-glycosyltransferase 83A1-like isoform X1 [Elaeis guineensis]
MSTRG.17117	NAT-lncRNA	IV	NC_025998.1	4962018	5088221	+	LOC105046691	antisense-overlapped	not overlapped	NC_025998.1	5061108	5080421	-	pseudogene	UDP-glycosyltransferase 83A1-like
MSTRG.17117	NAT-lncRNA	II	NC_025998.1	4962018	5088221	+	LOC105046646	antisense-overlapped	antisense-overlapped	NC_025998.1	5087119	5089567	-	XP_010923602.2	PREDICTED: UDP-glycosyltransferase 83A1-like [Elaeis guineensis]
MSTRG.17118	NAT-lncRNA	I	NC_025998.1	4973261	5089036	+	LOC105046642	antisense-overlapped	antisense-overlapped	NC_025998.1	4961428	4974587	-	XP_010923596.2	PREDICTED: uncharacterized protein LOC105046642 [Elaeis guineensis]
MSTRG.17118	NAT-lncRNA	IV	NC_025998.1	4973261	5089036	+	LOC105046690	antisense-overlapped	not overlapped	NC_025998.1	4991582	4992403	-	XP_010923650.2	PREDICTED: UDP-glycosyltransferase 83A1-like [Elaeis guineensis]
MSTRG.17118	NAT-lncRNA	IV	NC_025998.1	4973261	5089036	+	LOC105046644	antisense-overlapped	antisense-overlapped	NC_025998.1	4998032	4999413	-	XP_010923599.1	PREDICTED: UDP-glycosyltransferase 83A1-like [Elaeis guineensis]
MSTRG.17118	NAT-lncRNA	IV	NC_025998.1	4973261	5089036	+	LOC105046645	antisense-overlapped	antisense-overlapped	NC_025998.1	5017641	5019905	-	XP_010923600.1	PREDICTED: UDP-glycosyltransferase 83A1-like isoform X1 [Elaeis guineensis]
MSTRG.17118	NAT-lncRNA	IV	NC_025998.1	4973261	5089036	+	LOC105046691	antisense-overlapped	not overlapped	NC_025998.1	5061108	5080421	-	pseudogene	UDP-glycosyltransferase 83A1-like
MSTRG.17118	NAT-lncRNA	II	NC_025998.1	4973261	5089036	+	LOC105046646	antisense-overlapped	antisense-overlapped	NC_025998.1	5087119	5089567	-	XP_010923602.2	PREDICTED: UDP-glycosyltransferase 83A1-like [Elaeis guineensis]
MSTRG.17173	NAT-lncRNA	III	NC_025998.1	5863877	5865920	-	LOC105046677	antisense-overlapped	not overlapped	NC_025998.1	5862830	5878311	+	XP_010923638.1	PREDICTED: MADS-box protein CMB1 [Elaeis guineensis]
MSTRG.17217	NAT-lncRNA	III	NC_025998.1	6878022	6880608	-	LOC105046707	antisense-overlapped	not overlapped	NC_025998.1	6856308	6886957	+	XP_010923674.1	PREDICTED: nuclear transcription factor Y subunit A-7 isoform X1 [Elaeis guineensis]
MSTRG.17250	NAT-lncRNA	III	NC_025998.1	8001017	8002252	+	LOC105046733	antisense-overlapped	not overlapped	NC_025998.1	7967648	8008186	-	XP_019706705.1	PREDICTED: ABC transporter I family member 10, chloroplastic [Elaeis guineensis]
MSTRG.17271	NAT-lncRNA	III	NC_025998.1	9007412	9009992	+	LOC105046734	antisense-overlapped	not overlapped	NC_025998.1	8950731	9158773	-	XP_010923724.1	PREDICTED: protein MON2 homolog isoform X3 [Elaeis guineensis]
MSTRG.17302	NAT-lncRNA	III	NC_025998.1	10169957	10171234	+	LOC105046754	antisense-overlapped	not overlapped	NC_025998.1	10162723	10177008	-	XP_010923758.1	PREDICTED: uncharacterized protein LOC105046754 isoform X3 [Elaeis guineensis]
MSTRG.17644	NAT-lncRNA	IV	NC_025998.1	21506007	21556223	+	LOC105046888	antisense-overlapped	antisense-overlapped	NC_025998.1	21541812	21544857	-	XP_010923934.1	PREDICTED: peroxidase 1-like [Elaeis guineensis]
MSTRG.17699	NAT-lncRNA	III	NC_025998.1	22734947	22735920	+	LOC105046912	antisense-overlapped	not overlapped	NC_025998.1	22731847	22763076	-	XP_019706734.1	PREDICTED: transmembrane protein 97-like isoform X2 [Elaeis guineensis]
MSTRG.17721	NAT-lncRNA	II	NC_025998.1	24261445	24264946	+	LOC105046931	antisense-overlapped	antisense-overlapped	NC_025998.1	24263753	24271660	-	XP_010923983.1	PREDICTED: putative receptor-like protein kinase At4g00960 [Elaeis guineensis]
MSTRG.17892	NAT-lncRNA	III	NC_025998.1	29082492	29085584	+	LOC105047047	antisense-overlapped	not overlapped	NC_025998.1	29077491	29093262	-	XP_010924134.1	PREDICTED: LOW QUALITY PROTEIN: uncharacterized protein LOC105047047 [Elaeis guineensis]
MSTRG.18005	NAT-lncRNA	III	NC_025998.1	30725033	30725561	+	LOC105047115	antisense-overlapped	not overlapped	NC_025998.1	30721686	30729510	-	XP_019706695.1	PREDICTED: uncharacterized protein LOC105047115 isoform X2 [Elaeis guineensis]
MSTRG.18156	NAT-lncRNA	II	NC_025998.1	34345007	34346648	+	LOC105047237	antisense-overlapped	antisense-overlapped	NC_025998.1	34345969	34352464	-	XP_010924363.1	PREDICTED: uncharacterized protein LOC105047237 [Elaeis guineensis]
MSTRG.18268	NAT-lncRNA	III	NC_025998.1	35832119	35834693	+	LOC105047314	antisense-overlapped	not overlapped	NC_025998.1	35827523	35835030	-	XP_010924490.1	PREDICTED: probable protein arginine N-methyltransferase 1 [Elaeis guineensis]
MSTRG.18348	NAT-lncRNA	III	NC_025998.1	36867825	36868530	+	LOC105047369	antisense-overlapped	not overlapped	NC_025998.1	36867394	36872311	-	XP_010924585.1	PREDICTED: protein CURVATURE THYLAKOID 1C, chloroplastic [Elaeis guineensis]
MSTRG.18449	NAT-lncRNA	II	NC_025998.1	38406184	38406763	+	LOC105047465	antisense-overlapped	antisense-overlapped	NC_025998.1	38406407	38417235	-	XP_019706649.1	PREDICTED: uncharacterized protein LOC105047465 isoform X2 [Elaeis guineensis]
MSTRG.18458	NAT-lncRNA	III	NC_025998.1	38556710	38557005	-	LOC105047471	antisense-overlapped	antisense-overlapped	NC_025998.1	38551574	38562228	+	XP_010924703.1	PREDICTED: probable LRR receptor-like serine/threonine-protein kinase At1g53430 isoform X1 [Elaeis guineensis]
MSTRG.18553	NAT-lncRNA	III	NC_025998.1	40178430	40180390	+	LOC105047552	antisense-overlapped	not overlapped	NC_025998.1	40175352	40182420	-	XP_010924821.1	PREDICTED: CMP-sialic acid transporter 1-like isoform X2 [Elaeis guineensis]
MSTRG.18613	NAT-lncRNA	III	NC_025998.1	41099304	41099637	-	LOC105047596	antisense-overlapped	not overlapped	NC_025998.1	41081957	41101929	+	XP_010924888.1	PREDICTED: uncharacterized protein YNL011C isoform X3 [Elaeis guineensis]
MSTRG.18648	NAT-lncRNA	III	NC_025998.1	41351337	41353400	+	LOC105047618	antisense-overlapped	not overlapped	NC_025998.1	41350763	41359790	-	XP_010924917.1	PREDICTED: LOW QUALITY PROTEIN: F-box protein SKIP8 [Elaeis guineensis]
MSTRG.18731	NAT-lncRNA	III	NC_025998.1	42313767	42316019	+	LOC105047682	antisense-overlapped	antisense-overlapped	NC_025998.1	42309086	42316081	-	XP_010925022.1	PREDICTED: 31 kDa ribonucleoprotein, chloroplastic-like [Elaeis guineensis]
MSTRG.18737	NAT-lncRNA	I	NC_025998.1	42367235	42369394	+	LOC105047686	antisense-overlapped	antisense-overlapped	NC_025998.1	42366195	42367463	-	XP_010925031.1	PREDICTED: cytidine deaminase 1-like [Elaeis guineensis]
MSTRG.18766	NAT-lncRNA	III	NC_025998.1	42718735	42720808	-	LOC105047709	antisense-overlapped	not overlapped	NC_025998.1	42701527	42729902	+	XP_010925057.1	PREDICTED: alpha-amylase 3, chloroplastic [Elaeis guineensis]
MSTRG.18822	NAT-lncRNA	III	NC_025998.1	43601839	43603721	-	LOC105047748	antisense-overlapped	not overlapped	NC_025998.1	43600532	43604360	+	XP_010925112.1	PREDICTED: auxin-responsive protein IAA1 [Elaeis guineensis]
MSTRG.19003	NAT-lncRNA	II	NC_025999.1	1870833	1888349	+	LOC105047894	antisense-overlapped	not overlapped	NC_025999.1	1883339	1896813	-	XP_010925321.1	PREDICTED: probable serine incorporator isoform X1 [Elaeis guineensis]
MSTRG.19221	NAT-lncRNA	II	NC_025999.1	4648801	4658878	+	LOC105048057	antisense-overlapped	antisense-overlapped	NC_025999.1	4658430	4661496	-	XP_010925547.1	PREDICTED: transcription repressor MYB5-like [Elaeis guineensis]
MSTRG.19259	NAT-lncRNA	I	NC_025999.1	5228146	5228400	-	LOC109506106	antisense-overlapped	antisense-overlapped	NC_025999.1	5228268	5233872	+	XP_019707347.1	PREDICTED: uncharacterized protein LOC109506106 [Elaeis guineensis]
MSTRG.19492	NAT-lncRNA	III	NC_025999.1	8297901	8311198	+	LOC105048385	antisense-overlapped	antisense-overlapped	NC_025999.1	8297562	8316243	-	XP_019707064.1	PREDICTED: BAG family molecular chaperone regulator 6-like [Elaeis guineensis]
MSTRG.19492	NAT-lncRNA	II	NC_025999.1	8297901	8311198	+	LOC109506047	antisense-overlapped	antisense-overlapped	NC_025999.1	8310631	8311572	-	XP_019707065.1	PREDICTED: uncharacterized protein LOC109506047 [Elaeis guineensis]
MSTRG.19492	NAT-lncRNA	II	NC_025999.1	8297901	8311198	+	LOC109506048	antisense-overlapped	antisense-overlapped	NC_025999.1	8310669	8311578	-	XP_019707066.1	PREDICTED: uncharacterized protein LOC109506048 [Elaeis guineensis]
MSTRG.19567	NAT-lncRNA	III	NC_025999.1	9527024	9527639	-	LOC105048306	antisense-overlapped	not overlapped	NC_025999.1	9523814	9528904	+	XP_019707113.1	PREDICTED: cytochrome c-type biogenesis CcmH-like mitochondrial protein [Elaeis guineensis]
MSTRG.19685	NAT-lncRNA	III	NC_025999.1	11171841	11177429	-	LOC105048533	antisense-overlapped	antisense-overlapped	NC_025999.1	11149913	11220323	+	XP_019707560.1	PREDICTED: MADS-box transcription factor 23 isoform X1 [Elaeis guineensis]
MSTRG.19686	NAT-lncRNA	II	NC_025999.1	11177530	11253097	-	LOC105048533	antisense-overlapped	antisense-overlapped	NC_025999.1	11149913	11220323	+	XP_019707560.1	PREDICTED: MADS-box transcription factor 23 isoform X1 [Elaeis guineensis]
MSTRG.19769	NAT-lncRNA	III	NC_025999.1	12017360	12018339	-	LOC105048495	antisense-overlapped	antisense-overlapped	NC_025999.1	12016834	12018494	+	XP_010926114.1	PREDICTED: cysteine-rich repeat secretory protein 15-like [Elaeis guineensis]
MSTRG.19796	NAT-lncRNA	II	NC_025999.1	12348448	12357153	+	LOC105048476	antisense-overlapped	antisense-overlapped	NC_025999.1	12356631	12359855	-	XP_010926083.1	PREDICTED: G-type lectin S-receptor-like serine/threonine-protein kinase At1g34300 [Elaeis guineensis]
MSTRG.19883	NAT-lncRNA	III	NC_025999.1	13318686	13319322	+	LOC105048439	antisense-overlapped	not overlapped	NC_025999.1	13316138	13321065	-	XP_010926044.1	PREDICTED: uncharacterized protein LOC105048439 [Elaeis guineensis]
MSTRG.20128	NAT-lncRNA	III	NC_025999.1	17570662	17573266	+	LOC105048643	antisense-overlapped	not overlapped	NC_025999.1	17563665	17573450	-	XP_010926332.1	PREDICTED: cytochrome c oxidase subunit 6b-1 [Elaeis guineensis]
MSTRG.20300	NAT-lncRNA	III	NC_025999.1	21047454	21051715	-	LOC105048840	antisense-overlapped	not overlapped	NC_025999.1	21022168	21055525	+	XP_010926616.1	PREDICTED: uncharacterized protein LOC105048840 [Elaeis guineensis]
MSTRG.20789	NAT-lncRNA	I	NC_025999.1	37136604	37140789	-	LOC105049077	antisense-overlapped	antisense-overlapped	NC_025999.1	37137642	37146377	+	XP_010926922.2	PREDICTED: protein prune homolog [Elaeis guineensis]
MSTRG.20791	NAT-lncRNA	II	NC_025999.1	37141061	37151658	-	LOC105049077	antisense-overlapped	antisense-overlapped	NC_025999.1	37137642	37146377	+	XP_010926922.2	PREDICTED: protein prune homolog [Elaeis guineensis]
MSTRG.20827	NAT-lncRNA	II	NC_025999.1	37778966	37791309	-	LOC105049060	antisense-overlapped	antisense-overlapped	NC_025999.1	37775126	37779084	+	XP_010926899.1	PREDICTED: uncharacterized protein LOC105049060 [Elaeis guineensis]
MSTRG.20866	NAT-lncRNA	III	NC_025999.1	38761146	38761478	-	LOC105049185	antisense-overlapped	antisense-overlapped	NC_025999.1	38753737	38762395	+	XP_010927052.1	PREDICTED: uncharacterized protein LOC105049185 [Elaeis guineensis]
MSTRG.20874	NAT-lncRNA	I	NC_025999.1	39076007	39077665	-	LOC105049190	antisense-overlapped	antisense-overlapped	NC_025999.1	39077526	39079107	+	XP_010927058.1	PREDICTED: probable xyloglucan endotransglucosylase/hydrolase protein 23 [Elaeis guineensis]
MSTRG.21045	NAT-lncRNA	IV	NC_025999.1	42067850	42074253	-	LOC105049286	antisense-overlapped	not overlapped	NC_025999.1	42072419	42073198	+	XP_010927192.1	PREDICTED: auxin-induced protein 6B-like [Elaeis guineensis]
MSTRG.21255	NAT-lncRNA	III	NC_026000.1	2403974	2404361	+	LOC105049381	antisense-overlapped	antisense-overlapped	NC_026000.1	2400340	2404365	-	XP_019708099.1	PREDICTED: heat shock 70 kDa protein, mitochondrial-like [Elaeis guineensis]
MSTRG.21389	NAT-lncRNA	III	NC_026000.1	5103416	5105746	+	LOC105049571	antisense-overlapped	antisense-overlapped	NC_026000.1	5101520	5106360	-	XP_010927574.1	PREDICTED: succinate dehydrogenase [ubiquinone] iron-sulfur subunit 1, mitochondrial [Elaeis guineensis]
MSTRG.21440	NAT-lncRNA	III	NC_026000.1	5863377	5868270	-	LOC105049602	antisense-overlapped	not overlapped	NC_026000.1	5858172	5877146	+	XP_010927611.1	PREDICTED: fimbrin-2-like [Elaeis guineensis]
MSTRG.21489	NAT-lncRNA	III	NC_026000.1	7112269	7112792	+	LOC105049634	antisense-overlapped	antisense-overlapped	NC_026000.1	7112127	7132857	-	XP_019707913.1	PREDICTED: uncharacterized protein LOC105049634 isoform X1 [Elaeis guineensis]
MSTRG.21491	NAT-lncRNA	III	NC_026000.1	7132199	7132640	+	LOC105049634	antisense-overlapped	antisense-overlapped	NC_026000.1	7112127	7132857	-	XP_019707913.1	PREDICTED: uncharacterized protein LOC105049634 isoform X1 [Elaeis guineensis]
MSTRG.21554	NAT-lncRNA	III	NC_026000.1	8296518	8298375	+	LOC105049669	antisense-overlapped	antisense-overlapped	NC_026000.1	8296318	8302578	-	XP_019707959.1	PREDICTED: auxin efflux carrier component 5-like isoform X1 [Elaeis guineensis]
MSTRG.21756	NAT-lncRNA	I	NC_026000.1	15824919	15837772	-	LOC105049814	antisense-overlapped	not overlapped	NC_026000.1	15832711	15847350	+	XP_010927879.1	PREDICTED: pentatricopeptide repeat-containing protein At1g10270-like [Elaeis guineensis]
MSTRG.21847	NAT-lncRNA	III	NC_026000.1	17994326	17995125	-	LOC105049855	antisense-overlapped	antisense-overlapped	NC_026000.1	17989702	17995419	+	XP_010927926.1	PREDICTED: ubiquitin carboxyl-terminal hydrolase 22-like [Elaeis guineensis]
MSTRG.21905	NAT-lncRNA	III	NC_026000.1	19696263	19700720	+	LOC105049895	antisense-overlapped	not overlapped	NC_026000.1	19693221	19716213	-	XP_010927982.1	PREDICTED: ASC1-like protein 1 isoform X2 [Elaeis guineensis]
MSTRG.21994	NAT-lncRNA	II	NC_026000.1	21877179	21877628	-	LOC109504745	antisense-overlapped	antisense-overlapped	NC_026000.1	21863472	21877382	+	XP_019708009.1	PREDICTED: cellulose synthase-like protein E6 [Elaeis guineensis]
MSTRG.22196	NAT-lncRNA	III	NC_026000.1	25163181	25163847	+	LOC105050104	antisense-overlapped	not overlapped	NC_026000.1	25157262	25168420	-	XP_010928276.1	PREDICTED: LOW QUALITY PROTEIN: HSP-interacting protein-like [Elaeis guineensis]
MSTRG.22224	NAT-lncRNA	III	NC_026000.1	25541005	25543436	+	LOC105050127	antisense-overlapped	not overlapped	NC_026000.1	25536057	25549803	-	XP_010928322.1	PREDICTED: protein SMG7 [Elaeis guineensis]
MSTRG.22548	NAT-lncRNA	III	NC_026000.1	30547179	30547545	+	LOC105050356	antisense-overlapped	antisense-overlapped	NC_026000.1	30546746	30548204	-	XP_010928631.1	PREDICTED: zinc finger protein CONSTANS-LIKE 4-like [Elaeis guineensis]
MSTRG.22613	NAT-lncRNA	II	NC_026000.1	31206126	31207251	+	LOC105050393	antisense-overlapped	not overlapped	NC_026000.1	31206329	31209570	-	pseudogene	neurofilament heavy polypeptide-like
MSTRG.22651	NAT-lncRNA	III	NC_026000.1	31715634	31716138	+	LOC105050418	antisense-overlapped	antisense-overlapped	NC_026000.1	31712358	31724060	-	XP_010928724.1	PREDICTED: V-type proton ATPase catalytic subunit A [Elaeis guineensis]
MSTRG.22671	NAT-lncRNA	III	NC_026000.1	31972726	31973424	-	LOC105050438	antisense-overlapped	antisense-overlapped	NC_026000.1	31972565	31988654	+	XP_019708025.1	PREDICTED: kinesin-like calmodulin-binding protein homolog isoform X1 [Elaeis guineensis]
MSTRG.22677	NAT-lncRNA	III	NC_026000.1	32027336	32027679	+	LOC105050441	antisense-overlapped	antisense-overlapped	NC_026000.1	32026032	32030129	-	XP_010928762.1	PREDICTED: transcription factor GTE7 [Elaeis guineensis]
MSTRG.22718	NAT-lncRNA	II	NC_026000.1	32684922	32695658	+	LOC105050482	antisense-overlapped	antisense-overlapped	NC_026000.1	32690110	32702219	-	XP_010928831.1	PREDICTED: protein EMSY-LIKE 3-like isoform X2 [Elaeis guineensis]
MSTRG.22905	NAT-lncRNA	III	NC_026000.1	35241298	35243207	-	LOC105050655	antisense-overlapped	not overlapped	NC_026000.1	35230220	35246847	+	XP_010929062.1	PREDICTED: serine/threonine-protein phosphatase 2A 65 kDa regulatory subunit A beta isoform-like [Elaeis guineensis]
MSTRG.23137	NAT-lncRNA	III	NC_026000.1	38055225	38058419	+	LOC105050807	antisense-overlapped	not overlapped	NC_026000.1	38052321	38063225	-	XP_010929274.1	PREDICTED: COP9 signalosome complex subunit 5b [Elaeis guineensis]
MSTRG.23329	NAT-lncRNA	IV	NC_026001.1	380617	398682	-	LOC105050970	antisense-overlapped	antisense-overlapped	NC_026001.1	382534	392864	+	XP_010929506.1	PREDICTED: potassium transporter 5 [Elaeis guineensis]
MSTRG.23421	NAT-lncRNA	III	NC_026001.1	2191060	2191393	+	LOC105051134	antisense-overlapped	antisense-overlapped	NC_026001.1	2171472	2202403	-	XP_019708309.1	PREDICTED: protein BONZAI 1-like [Elaeis guineensis]
MSTRG.23445	NAT-lncRNA	III	NC_026001.1	2673135	2673791	-	LOC105051079	antisense-overlapped	antisense-overlapped	NC_026001.1	2672679	2674936	+	XP_019708262.1	PREDICTED: short-chain dehydrogenase reductase 2a isoform X4 [Elaeis guineensis]
MSTRG.23453	NAT-lncRNA	III	NC_026001.1	2804000	2816413	+	LOC105051073	antisense-overlapped	not overlapped	NC_026001.1	2797849	2829064	-	XP_010929655.1	PREDICTED: coiled-coil domain-containing protein SCD2 isoform X2 [Elaeis guineensis]
MSTRG.23503	NAT-lncRNA	III	NC_026001.1	3801933	3802398	+	LOC105051040	antisense-overlapped	not overlapped	NC_026001.1	3799338	3803107	-	XP_010929606.1	PREDICTED: glycerophosphodiester phosphodiesterase GDPD1, chloroplastic-like [Elaeis guineensis]
MSTRG.23534	NAT-lncRNA	II	NC_026001.1	4477170	4540904	+	LOC105051018	antisense-overlapped	antisense-overlapped	NC_026001.1	4540613	4541557	-	XP_010929580.1	PREDICTED: uncharacterized protein LOC105051018 [Elaeis guineensis]
MSTRG.23566	NAT-lncRNA	II	NC_026001.1	5823946	5848490	+	LOC105051141	antisense-overlapped	antisense-overlapped	NC_026001.1	5846174	5856763	-	XP_010929745.1	PREDICTED: LOW QUALITY PROTEIN: probable sucrose-phosphate synthase 2 [Elaeis guineensis]
MSTRG.23685	NAT-lncRNA	I	NC_026001.1	10628870	10630896	+	LOC105051216	antisense-overlapped	antisense-overlapped	NC_026001.1	10627641	10629687	-	XP_010929841.1	PREDICTED: pirin-like protein [Elaeis guineensis]
MSTRG.23739	NAT-lncRNA	III	NC_026001.1	13059707	13060018	+	LOC105051229	antisense-overlapped	not overlapped	NC_026001.1	13019430	13074403	-	XP_010929863.1	PREDICTED: ribonuclease H2 subunit B isoform X2 [Elaeis guineensis]
MSTRG.23915	NAT-lncRNA	II	NC_026001.1	18927501	19336431	-	LOC105051301	antisense-overlapped	not overlapped	NC_026001.1	18919515	18933863	+	XP_010929959.1	PREDICTED: cleavage and polyadenylation specificity factor subunit CG7185 [Elaeis guineensis]
MSTRG.23915	NAT-lncRNA	IV	NC_026001.1	18927501	19336431	-	LOC105051304	antisense-overlapped	not overlapped	NC_026001.1	19062104	19080391	+	XP_010929961.1	PREDICTED: uncharacterized protein LOC105051304 isoform X1 [Elaeis guineensis]
MSTRG.23935	NAT-lncRNA	III	NC_026001.1	19794534	19794916	+	LOC105051313	antisense-overlapped	not overlapped	NC_026001.1	19793929	19798479	-	XP_010929984.1	PREDICTED: ultraviolet-B receptor UVR8 isoform X2 [Elaeis guineensis]
MSTRG.23968	NAT-lncRNA	III	NC_026001.1	20395295	20396508	+	LOC105051349	antisense-overlapped	not overlapped	NC_026001.1	20387441	20400072	-	XP_010930028.1	PREDICTED: elongator complex protein 3 isoform X1 [Elaeis guineensis]
MSTRG.24019	NAT-lncRNA	III	NC_026001.1	21934618	21934987	-	LOC105051381	antisense-overlapped	antisense-overlapped	NC_026001.1	21925448	21937677	+	XP_010930091.1	PREDICTED: cyclin-dependent kinase G-2-like isoform X1 [Elaeis guineensis]
MSTRG.24063	NAT-lncRNA	III	NC_026001.1	22738178	22739042	+	LOC105051407	antisense-overlapped	not overlapped	NC_026001.1	22735914	22752673	-	XP_010930152.1	PREDICTED: uncharacterized protein LOC105051407 isoform X2 [Elaeis guineensis]
MSTRG.24117	NAT-lncRNA	I	NC_026001.1	23845453	23868695	+	LOC105051434	antisense-overlapped	antisense-overlapped	NC_026001.1	23844447	23847900	-	XP_010930189.1	PREDICTED: protein NRT1/ PTR FAMILY 4.6-like isoform X2 [Elaeis guineensis]
MSTRG.24117	NAT-lncRNA	II	NC_026001.1	23845453	23868695	+	LOC105051433	antisense-overlapped	antisense-overlapped	NC_026001.1	23867318	23903065	-	XP_010930187.1	PREDICTED: protein NRT1/ PTR FAMILY 4.6 isoform X2 [Elaeis guineensis]
MSTRG.24118	NAT-lncRNA	I	NC_026001.1	23846406	23870107	+	LOC105051434	antisense-overlapped	antisense-overlapped	NC_026001.1	23844447	23847900	-	XP_010930189.1	PREDICTED: protein NRT1/ PTR FAMILY 4.6-like isoform X2 [Elaeis guineensis]
MSTRG.24118	NAT-lncRNA	II	NC_026001.1	23846406	23870107	+	LOC105051433	antisense-overlapped	antisense-overlapped	NC_026001.1	23867318	23903065	-	XP_010930187.1	PREDICTED: protein NRT1/ PTR FAMILY 4.6 isoform X2 [Elaeis guineensis]
MSTRG.24431	NAT-lncRNA	II	NC_026001.1	29855398	29867698	-	LOC105051841	antisense-overlapped	antisense-overlapped	NC_026001.1	29854235	29855647	+	XP_010930777.1	PREDICTED: myb-related protein 308-like [Elaeis guineensis]
MSTRG.24528	NAT-lncRNA	III	NC_026001.1	31085142	31085494	+	LOC105051766	antisense-overlapped	antisense-overlapped	NC_026001.1	31084044	31086072	-	XP_010930666.1	PREDICTED: uncharacterized protein LOC105051766 [Elaeis guineensis]
MSTRG.24537	NAT-lncRNA	III	NC_026001.1	31169778	31170992	-	LOC105051758	antisense-overlapped	antisense-overlapped	NC_026001.1	31163951	31173031	+	XP_010930652.1	PREDICTED: ACT domain-containing protein ACR3 [Elaeis guineensis]
MSTRG.24560	NAT-lncRNA	III	NC_026001.1	31456057	31457321	+	LOC105051746	antisense-overlapped	not overlapped	NC_026001.1	31425795	31459416	-	XP_010930638.1	PREDICTED: phosphatidylinositol 4-kinase beta 1-like isoform X1 [Elaeis guineensis]
MSTRG.24600	NAT-lncRNA	III	NC_026001.1	31975184	31976933	+	LOC105051715	antisense-overlapped	not overlapped	NC_026001.1	31957793	31977498	-	XP_019708420.1	PREDICTED: chaperone protein dnaJ 8, chloroplastic isoform X3 [Elaeis guineensis]
MSTRG.24632	NAT-lncRNA	II	NC_026001.1	32401492	32404609	-	LOC105051693	antisense-overlapped	antisense-overlapped	NC_026001.1	32398734	32402182	+	XP_010930550.1	PREDICTED: GDSL esterase/lipase At1g71250 [Elaeis guineensis]
MSTRG.24696	NAT-lncRNA	III	NC_026001.1	33357769	33358792	-	LOC105051959	antisense-overlapped	not overlapped	NC_026001.1	33355395	33364729	+	XP_010930922.1	PREDICTED: PTI1-like tyrosine-protein kinase 3 [Elaeis guineensis]
MSTRG.24747	NAT-lncRNA	II	NC_026001.1	33872318	33878576	+	LOC105051927	antisense-overlapped	antisense-overlapped	NC_026001.1	33873075	33883680	-	XP_010930878.1	PREDICTED: fatty acid amide hydrolase [Elaeis guineensis]
MSTRG.24786	NAT-lncRNA	III	NC_026001.1	34338420	34338782	-	LOC105051990	antisense-overlapped	antisense-overlapped	NC_026001.1	34338389	34339713	+	XP_010930964.1	PREDICTED: knob-associated histidine-rich protein-like [Elaeis guineensis]
MSTRG.24788	NAT-lncRNA	II	NC_026001.1	34373892	34375581	+	LOC105051993	antisense-overlapped	antisense-overlapped	NC_026001.1	34374224	34377509	-	XP_010930967.1	PREDICTED: UPF0496 protein At1g20180-like [Elaeis guineensis]
MSTRG.24941	NAT-lncRNA	III	NC_026001.1	37219847	37223267	+	LOC105052086	antisense-overlapped	not overlapped	NC_026001.1	37217395	37227131	-	XP_010931091.1	PREDICTED: mitochondrial-processing peptidase subunit alpha-like isoform X1 [Elaeis guineensis]
MSTRG.25577	NAT-lncRNA	III	NC_026002.1	13459248	13464547	+	LOC105052706	antisense-overlapped	not overlapped	NC_026002.1	13450513	13465504	-	XP_010931926.1	PREDICTED: macrophage erythroblast attacher [Elaeis guineensis]
MSTRG.25607	NAT-lncRNA	III	NC_026002.1	13934745	13935960	-	LOC105052691	antisense-overlapped	not overlapped	NC_026002.1	13907496	13947939	+	XP_010931902.1	PREDICTED: vacuolar protein sorting-associated protein 18 homolog isoform X1 [Elaeis guineensis]
MSTRG.25638	NAT-lncRNA	III	NC_026002.1	14642609	14642935	+	LOC105052668	antisense-overlapped	antisense-overlapped	NC_026002.1	14639526	14643262	-	XP_010931871.1	PREDICTED: cytochrome P450 71A9-like [Elaeis guineensis]
MSTRG.25662	NAT-lncRNA	III	NC_026002.1	15027040	15027345	+	LOC105052655	antisense-overlapped	antisense-overlapped	NC_026002.1	15024563	15027390	-	XP_010931851.1	PREDICTED: pentatricopeptide repeat-containing protein At5g50390, chloroplastic [Elaeis guineensis]
MSTRG.25721	NAT-lncRNA	II	NC_026002.1	16031152	16031676	+	LOC105052610	antisense-overlapped	antisense-overlapped	NC_026002.1	16031499	16035774	-	XP_010931770.1	PREDICTED: probable pre-mRNA-splicing factor ATP-dependent RNA helicase DEAH2 [Elaeis guineensis]
MSTRG.25805	NAT-lncRNA	II	NC_026002.1	16894615	16900594	-	LOC105052564	antisense-overlapped	antisense-overlapped	NC_026002.1	16889393	16897724	+	XP_019708662.1	PREDICTED: kinesin-like protein KIN-14I [Elaeis guineensis]
MSTRG.25818	NAT-lncRNA	III	NC_026002.1	17036126	17037167	-	LOC105052554	antisense-overlapped	not overlapped	NC_026002.1	17029145	17045964	+	XP_010931695.1	PREDICTED: pumilio homolog 24 [Elaeis guineensis]
MSTRG.25944	NAT-lncRNA	II	NC_026002.1	18708298	18713398	+	LOC105052806	antisense-overlapped	antisense-overlapped	NC_026002.1	18712995	18732034	-	XP_010932033.2	PREDICTED: filament-like plant protein 7 [Elaeis guineensis]
MSTRG.26191	NAT-lncRNA	III	NC_026002.1	21647134	21648453	+	LOC105052971	antisense-overlapped	antisense-overlapped	NC_026002.1	21646483	21648544	-	XP_010932263.1	PREDICTED: uncharacterized protein LOC105052971 [Elaeis guineensis]
MSTRG.26311	NAT-lncRNA	III	NC_026002.1	23072720	23074050	+	LOC105053060	antisense-overlapped	not overlapped	NC_026002.1	23071814	23078084	-	XP_010932378.1	PREDICTED: 20 kDa chaperonin, chloroplastic [Elaeis guineensis]
MSTRG.26535	NAT-lncRNA	III	NC_026002.1	26163475	26163971	-	LOC105053205	antisense-overlapped	not overlapped	NC_026002.1	26084094	26172574	+	XP_010932591.1	PREDICTED: uncharacterized protein LOC105053205 isoform X1 [Elaeis guineensis]
MSTRG.26541	NAT-lncRNA	III	NC_026002.1	26268870	26272451	+	LOC105053208	antisense-overlapped	not overlapped	NC_026002.1	26268182	26282552	-	XP_019708925.1	PREDICTED: LOW QUALITY PROTEIN: putative 1-phosphatidylinositol-3-phosphate 5-kinase FAB1C [Elaeis guineensis]
MSTRG.26666	NAT-lncRNA	II	NC_026002.1	28423935	28433942	-	LOC105053363	antisense-overlapped	antisense-overlapped	NC_026002.1	28422936	28425764	+	XP_010932770.1	PREDICTED: histone-lysine N-methyltransferase 2D-like [Elaeis guineensis]
MSTRG.26666	NAT-lncRNA	I	NC_026002.1	28423935	28433942	-	LOC105053362	antisense-overlapped	antisense-overlapped	NC_026002.1	28432682	28435499	+	XP_010932769.1	PREDICTED: uncharacterized protein LOC105053362 [Elaeis guineensis]
MSTRG.26667	NAT-lncRNA	II	NC_026002.1	28436160	28437783	+	LOC105053365	antisense-overlapped	not overlapped	NC_026002.1	28437686	28439884	-	XP_010932771.1	PREDICTED: uncharacterized protein LOC105053365 [Elaeis guineensis]
MSTRG.26690	NAT-lncRNA	III	NC_026002.1	28788147	28789831	-	LOC105053376	antisense-overlapped	not overlapped	NC_026002.1	28777647	28802270	+	XP_010932800.1	PREDICTED: WD repeat-containing protein DDB_G0290555 [Elaeis guineensis]
MSTRG.26734	NAT-lncRNA	III	NC_026002.1	29506939	29516308	+	LOC105053473	antisense-overlapped	not overlapped	NC_026002.1	29502461	29521673	-	XP_010932956.1	PREDICTED: uncharacterized protein LOC105053473 [Elaeis guineensis]
MSTRG.26845	NAT-lncRNA	III	NC_026002.1	31139284	31143726	-	LOC105053417	antisense-overlapped	antisense-overlapped	NC_026002.1	31131728	31145226	+	XP_010932853.1	PREDICTED: U-box domain-containing protein 44-like [Elaeis guineensis]
MSTRG.26863	NAT-lncRNA	II	NC_026002.1	31483063	31499116	-	LOC105053403	antisense-overlapped	not overlapped	NC_026002.1	31476422	31491343	+	XP_010932833.1	PREDICTED: protein argonaute 10 [Elaeis guineensis]
MSTRG.26928	NAT-lncRNA	II	NC_026003.1	2601204	3041453	-	LOC105053531	antisense-overlapped	antisense-overlapped	NC_026003.1	2601116	2604217	+	XP_019709165.1	PREDICTED: protein Rf1, mitochondrial-like [Elaeis guineensis]
MSTRG.26928	NAT-lncRNA	IV	NC_026003.1	2601204	3041453	-	LOC105053533	antisense-overlapped	not overlapped	NC_026003.1	2699167	2702105	+	XP_010933042.1	PREDICTED: protein Rf1, mitochondrial-like [Elaeis guineensis]
MSTRG.26928	NAT-lncRNA	IV	NC_026003.1	2601204	3041453	-	LOC105053537	antisense-overlapped	not overlapped	NC_026003.1	2855850	2863997	+	XP_010933045.1	PREDICTED: maltose excess protein 1-like, chloroplastic isoform X1 [Elaeis guineensis]
MSTRG.26928	NAT-lncRNA	IV	NC_026003.1	2601204	3041453	-	LOC105053539	antisense-overlapped	antisense-overlapped	NC_026003.1	2915159	2918154	+	XP_010933048.1	PREDICTED: pentatricopeptide repeat-containing protein At1g63330-like [Elaeis guineensis]
MSTRG.26928	NAT-lncRNA	I	NC_026003.1	2601204	3041453	-	LOC105053540	antisense-overlapped	antisense-overlapped	NC_026003.1	3041061	3044844	+	XP_010933049.2	PREDICTED: LOW QUALITY PROTEIN: pentatricopeptide repeat-containing protein At1g63330-like [Elaeis guineensis]
MSTRG.27009	NAT-lncRNA	III	NC_026003.1	6229401	6230667	+	LOC105053584	antisense-overlapped	not overlapped	NC_026003.1	6218152	6236858	-	XP_010933106.1	PREDICTED: uncharacterized alpha-1,2-galactosyltransferase C1289.13c isoform X1 [Elaeis guineensis]
MSTRG.27010	NAT-lncRNA	III	NC_026003.1	6233302	6233787	+	LOC105053584	antisense-overlapped	not overlapped	NC_026003.1	6218152	6236858	-	XP_010933106.1	PREDICTED: uncharacterized alpha-1,2-galactosyltransferase C1289.13c isoform X1 [Elaeis guineensis]
MSTRG.27225	NAT-lncRNA	III	NC_026003.1	11681261	11684262	+	LOC105053732	antisense-overlapped	not overlapped	NC_026003.1	11655003	11695075	-	XP_010933297.1	PREDICTED: UPF0415 protein C7orf25 homolog isoform X1 [Elaeis guineensis]
MSTRG.27414	NAT-lncRNA	III	NC_026003.1	16783428	16791982	-	LOC105054226	antisense-overlapped	not overlapped	NC_026003.1	16768699	16802436	+	XP_010933998.1	PREDICTED: protein FIZZY-RELATED 1-like [Elaeis guineensis]
MSTRG.27484	NAT-lncRNA	III	NC_026003.1	18014573	18015756	+	LOC105054174	antisense-overlapped	not overlapped	NC_026003.1	18010923	18015998	-	XP_010933922.1	PREDICTED: K(+) efflux antiporter 4-like isoform X2 [Elaeis guineensis]
MSTRG.27495	NAT-lncRNA	III	NC_026003.1	18227444	18228512	+	LOC105054165	antisense-overlapped	not overlapped	NC_026003.1	18226994	18233581	-	XP_010933912.2	PREDICTED: copper chaperone for superoxide dismutase, chloroplastic [Elaeis guineensis]
MSTRG.27721	NAT-lncRNA	III	NC_026003.1	21615818	21617537	-	LOC105054026	antisense-overlapped	not overlapped	NC_026003.1	21614446	21621461	+	XP_010933701.1	PREDICTED: uncharacterized protein LOC105054026 [Elaeis guineensis]
MSTRG.27795	NAT-lncRNA	I	NC_026003.1	22741810	22756783	+	LOC105053984	antisense-overlapped	antisense-overlapped	NC_026003.1	22739099	22745669	-	XP_010933645.1	PREDICTED: coatomer subunit alpha-1-like [Elaeis guineensis]
MSTRG.27795	NAT-lncRNA	II	NC_026003.1	22741810	22756783	+	LOC105053983	antisense-overlapped	antisense-overlapped	NC_026003.1	22753392	22760264	-	XP_010933642.1	PREDICTED: coatomer subunit alpha-1-like [Elaeis guineensis]
MSTRG.27906	NAT-lncRNA	II	NC_026003.1	24094122	24098581	+	LOC105053908	antisense-overlapped	not overlapped	NC_026003.1	24095884	24098869	-	pseudogene	beta-amylase 3, chloroplastic-like
MSTRG.27928	NAT-lncRNA	III	NC_026003.1	24320265	24320833	-	LOC105053894	antisense-overlapped	not overlapped	NC_026003.1	24304028	24331504	+	XP_010933530.1	PREDICTED: LOW QUALITY PROTEIN: NAD-dependent malic enzyme 62 kDa isoform, mitochondrial [Elaeis guineensis]
MSTRG.28271	NAT-lncRNA	I	NC_026003.1	28835154	28924760	+	LOC105054501	antisense-overlapped	not overlapped	NC_026003.1	28833124	28837489	-	XP_010934327.1	PREDICTED: phenylalanine ammonia-lyase-like [Elaeis guineensis]
MSTRG.28271	NAT-lncRNA	II	NC_026003.1	28835154	28924760	+	LOC105054503	antisense-overlapped	not overlapped	NC_026003.1	28914444	28925609	-	XP_019709387.1	PREDICTED: small nuclear ribonucleoprotein Sm D2 isoform X1 [Elaeis guineensis]
MSTRG.28301	NAT-lncRNA	III	NC_026003.1	29231187	29231469	-	LOC105054519	antisense-overlapped	antisense-overlapped	NC_026003.1	29230812	29231873	+	XP_010934350.1	PREDICTED: vegetative cell wall protein gp1 [Elaeis guineensis]
MSTRG.28405	NAT-lncRNA	III	NC_026004.1	2947825	2956377	-	LOC105054676	antisense-overlapped	not overlapped	NC_026004.1	2936911	2962833	+	XP_019709551.1	PREDICTED: LOW QUALITY PROTEIN: beta-galactosidase 1-like [Elaeis guineensis]
MSTRG.28407	NAT-lncRNA	II	NC_026004.1	2962678	2968346	-	LOC105054676	antisense-overlapped	antisense-overlapped	NC_026004.1	2936911	2962833	+	XP_019709551.1	PREDICTED: LOW QUALITY PROTEIN: beta-galactosidase 1-like [Elaeis guineensis]
MSTRG.28440	NAT-lncRNA	III	NC_026004.1	3894858	3895641	-	LOC105054613	antisense-overlapped	not overlapped	NC_026004.1	3883919	3927546	+	XP_010934474.1	PREDICTED: cell division protein FtsY homolog, chloroplastic isoform X1 [Elaeis guineensis]
MSTRG.28558	NAT-lncRNA	III	NC_026004.1	7186625	7203090	+	LOC105054691	antisense-overlapped	not overlapped	NC_026004.1	7151446	7261150	-	XP_010934560.1	PREDICTED: transmembrane and coiled-coil domain-containing protein 4-like isoform X1 [Elaeis guineensis]
MSTRG.28567	NAT-lncRNA	II	NC_026004.1	7664143	7675645	+	LOC105054697	antisense-overlapped	antisense-overlapped	NC_026004.1	7671223	7677830	-	XP_010934570.1	PREDICTED: cytochrome P450 704C1-like [Elaeis guineensis]
MSTRG.28593	NAT-lncRNA	III	NC_026004.1	8420935	8449369	+	LOC105054712	antisense-overlapped	antisense-overlapped	NC_026004.1	8419080	8454464	-	XP_010934582.1	PREDICTED: ABC transporter G family member 45-like [Elaeis guineensis]
MSTRG.28624	NAT-lncRNA	I	NC_026004.1	9084595	9150160	+	LOC105054801	antisense-overlapped	antisense-overlapped	NC_026004.1	9078837	9089061	-	XP_010934697.1	PREDICTED: ABC transporter B family member 19-like [Elaeis guineensis]
MSTRG.28624	NAT-lncRNA	II	NC_026004.1	9084595	9150160	+	LOC105054803	antisense-overlapped	antisense-overlapped	NC_026004.1	9144331	9153262	-	XP_010934699.1	PREDICTED: ABC transporter B family member 10-like [Elaeis guineensis]
MSTRG.28732	NAT-lncRNA	I	NC_026004.1	11526571	11529316	+	LOC105054781	antisense-overlapped	antisense-overlapped	NC_026004.1	11457412	11529310	-	XP_010934674.1	PREDICTED: SNARE-interacting protein KEULE-like isoform X2 [Elaeis guineensis]
MSTRG.28862	NAT-lncRNA	I	NC_026004.1	13716079	13717868	+	LOC105054910	antisense-overlapped	antisense-overlapped	NC_026004.1	13715690	13716208	-	XP_010934854.1	PREDICTED: F-box/LRR-repeat protein At3g48880-like [Elaeis guineensis]
MSTRG.28916	NAT-lncRNA	III	NC_026004.1	14487459	14488106	-	LOC105054967	antisense-overlapped	not overlapped	NC_026004.1	14478768	14488864	+	XP_010934938.1	PREDICTED: mitogen-activated protein kinase 2 isoform X3 [Elaeis guineensis]
MSTRG.28925	NAT-lncRNA	III	NC_026004.1	14607343	14608994	+	LOC105054962	antisense-overlapped	not overlapped	NC_026004.1	14594399	14610542	-	XP_010934933.2	PREDICTED: LOW QUALITY PROTEIN: protein PAF1 homolog [Elaeis guineensis]
MSTRG.29342	NAT-lncRNA	III	NC_026004.1	20644460	20644822	-	LOC105055342	antisense-overlapped	not overlapped	NC_026004.1	20629835	20701813	+	XP_019709592.1	PREDICTED: putative disease resistance protein RGA3 [Elaeis guineensis]
MSTRG.29343	NAT-lncRNA	III	NC_026004.1	20682899	20683290	-	LOC105055342	antisense-overlapped	not overlapped	NC_026004.1	20629835	20701813	+	XP_019709592.1	PREDICTED: putative disease resistance protein RGA3 [Elaeis guineensis]
MSTRG.29406	NAT-lncRNA	II	NC_026004.1	21447207	21556194	-	LOC105055279	antisense-overlapped	not overlapped	NC_026004.1	21422114	21493518	+	XP_019709648.1	PREDICTED: putative disease resistance protein RGA4 isoform X1 [Elaeis guineensis]
MSTRG.29406	NAT-lncRNA	IV	NC_026004.1	21447207	21556194	-	LOC105055277	antisense-overlapped	not overlapped	NC_026004.1	21524288	21526864	+	XP_010935354.1	PREDICTED: putative disease resistance protein RGA4 [Elaeis guineensis]
MSTRG.29406	NAT-lncRNA	IV	NC_026004.1	21447207	21556194	-	LOC105055351	antisense-overlapped	not overlapped	NC_026004.1	21542205	21546276	+	XP_019709651.1	PREDICTED: LOW QUALITY PROTEIN: putative disease resistance protein At3g14460 [Elaeis guineensis]
MSTRG.29407	NAT-lncRNA	III	NC_026004.1	21463068	21467298	+	LOC105055280	antisense-overlapped	not overlapped	NC_026004.1	21429215	21534412	-	XP_019709652.1	PREDICTED: protein canopy-1 [Elaeis guineensis]
MSTRG.29432	NAT-lncRNA	III	NC_026004.1	21945550	21955069	+	LOC105055357	antisense-overlapped	antisense-overlapped	NC_026004.1	21943279	21956835	-	XP_019709576.1	PREDICTED: LOW QUALITY PROTEIN: putative disease resistance protein RGA3 [Elaeis guineensis]
MSTRG.29594	NAT-lncRNA	III	NC_026004.1	23585072	23585397	+	LOC105055472	antisense-overlapped	antisense-overlapped	NC_026004.1	23584887	23597340	-	XP_010935597.1	PREDICTED: pyruvate kinase, cytosolic isozyme [Elaeis guineensis]
MSTRG.29634	NAT-lncRNA	I	NC_026004.1	24018045	24047845	+	LOC105055502	antisense-overlapped	not overlapped	NC_026004.1	24014050	24020309	-	XP_010935649.1	PREDICTED: GPN-loop GTPase 3 [Elaeis guineensis]
MSTRG.29634	NAT-lncRNA	II	NC_026004.1	24018045	24047845	+	LOC105055542	antisense-overlapped	not overlapped	NC_026004.1	24032068	24052380	-	XP_019709584.1	PREDICTED: LOW QUALITY PROTEIN: pentatricopeptide repeat-containing protein At5g27270-like [Elaeis guineensis]
MSTRG.29634	NAT-lncRNA	II	NC_026004.1	24018045	24047845	+	LOC105055503	antisense-overlapped	antisense-overlapped	NC_026004.1	24044509	24048872	-	XP_010935650.1	PREDICTED: GPN-loop GTPase 3 [Elaeis guineensis]
MSTRG.29662	NAT-lncRNA	III	NC_026004.1	24270181	24270506	+	LOC105055643	antisense-overlapped	antisense-overlapped	NC_026004.1	24259832	24272085	-	XP_010935850.1	PREDICTED: LOW QUALITY PROTEIN: mitogen-activated protein kinase kinase kinase YODA-like [Elaeis guineensis]
MSTRG.30011	NAT-lncRNA	III	NC_026004.1	28502352	28503291	+	LOC105055669	antisense-overlapped	antisense-overlapped	NC_026004.1	28497617	28510735	-	XP_010935883.1	PREDICTED: GATA transcription factor 28-like [Elaeis guineensis]
MSTRG.30025	NAT-lncRNA	III	NC_026004.1	28594510	28595117	-	LOC105055666	antisense-overlapped	not overlapped	NC_026004.1	28591293	28599666	+	pseudogene	clathrin interactor EPSIN 2-like
MSTRG.30188	NAT-lncRNA	I	NC_026005.1	3125303	3129970	+	LOC105055938	antisense-overlapped	antisense-overlapped	NC_026005.1	3123180	3126502	-	XP_010936276.1	PREDICTED: scarecrow-like protein 4 [Elaeis guineensis]
MSTRG.30650	NAT-lncRNA	III	NC_026005.1	13983099	13983362	+	LOC105056256	antisense-overlapped	antisense-overlapped	NC_026005.1	13978899	13983413	-	XP_010936694.1	PREDICTED: pentatricopeptide repeat-containing protein At3g06920 [Elaeis guineensis]
MSTRG.30775	NAT-lncRNA	IV	NC_026005.1	16860695	16866804	+	LOC105056332	antisense-overlapped	not overlapped	NC_026005.1	16865056	16866484	-	XP_010936797.1	PREDICTED: peptidyl-prolyl cis-trans isomerase CYP26-2, chloroplastic [Elaeis guineensis]
MSTRG.30835	NAT-lncRNA	III	NC_026005.1	17945063	17950037	+	LOC105056381	antisense-overlapped	not overlapped	NC_026005.1	17922278	17961220	-	XP_010936858.1	PREDICTED: LOW QUALITY PROTEIN: putative 3,4-dihydroxy-2-butanone kinase [Elaeis guineensis]
MSTRG.31291	NAT-lncRNA	III	NC_026005.1	24325094	24338082	+	LOC105056679	antisense-overlapped	not overlapped	NC_026005.1	24318281	24338205	-	XP_019709967.1	PREDICTED: SH3 domain-containing protein PJ696.02-like [Elaeis guineensis]
MSTRG.31360	NAT-lncRNA	II	NC_026005.1	25482803	25485389	+	LOC105056724	antisense-overlapped	antisense-overlapped	NC_026005.1	25485161	25489854	-	XP_010937336.1	PREDICTED: serine/threonine-protein kinase RIPK [Elaeis guineensis]
MSTRG.31612	NAT-lncRNA	II	NC_026006.1	1218456	1220470	+	LOC105056967	antisense-overlapped	antisense-overlapped	NC_026006.1	1219476	1229995	-	XP_019710325.1	PREDICTED: uncharacterized protein LOC105056967 [Elaeis guineensis]
MSTRG.31795	NAT-lncRNA	III	NC_026006.1	3051531	3052054	-	LOC105057098	antisense-overlapped	antisense-overlapped	NC_026006.1	3049254	3052175	+	XP_010937855.1	PREDICTED: zinc finger CCCH domain-containing protein 33-like [Elaeis guineensis]
MSTRG.31835	NAT-lncRNA	III	NC_026006.1	3421303	3421531	+	LOC105057126	antisense-overlapped	antisense-overlapped	NC_026006.1	3419099	3421882	-	XP_010937904.1	PREDICTED: zinc transporter 6, chloroplastic [Elaeis guineensis]
MSTRG.31857	NAT-lncRNA	III	NC_026006.1	3581618	3582236	+	LOC105057137	antisense-overlapped	not overlapped	NC_026006.1	3572590	3584277	-	XP_010937920.1	PREDICTED: LIMR family protein Os06g0128200 isoform X2 [Elaeis guineensis]
MSTRG.32027	NAT-lncRNA	III	NC_026006.1	5559385	5559696	-	LOC105057260	antisense-overlapped	antisense-overlapped	NC_026006.1	5551034	5559794	+	XP_019710490.1	PREDICTED: uncharacterized protein LOC105057260 [Elaeis guineensis]
MSTRG.32080	NAT-lncRNA	III	NC_026006.1	6074141	6074461	+	LOC105057297	antisense-overlapped	antisense-overlapped	NC_026006.1	6074031	6077490	-	XP_019710495.1	PREDICTED: probable protein phosphatase 2C 47 [Elaeis guineensis]
MSTRG.32081	NAT-lncRNA	III	NC_026006.1	6075372	6075696	+	LOC105057297	antisense-overlapped	antisense-overlapped	NC_026006.1	6074031	6077490	-	XP_019710495.1	PREDICTED: probable protein phosphatase 2C 47 [Elaeis guineensis]
MSTRG.32331	NAT-lncRNA	III	NC_026006.1	9583252	9583793	+	LOC105057429	antisense-overlapped	antisense-overlapped	NC_026006.1	9582955	9584411	-	XP_019710261.1	PREDICTED: uncharacterized protein LOC105057429 isoform X2 [Elaeis guineensis]
MSTRG.32789	NAT-lncRNA	III	NC_026006.1	19959485	19960187	+	LOC105057830	antisense-overlapped	not overlapped	NC_026006.1	19936949	19964067	-	XP_010938839.1	PREDICTED: ATP synthase mitochondrial F1 complex assembly factor 2 [Elaeis guineensis]
MSTRG.33060	NAT-lncRNA	III	NC_026007.1	5041135	5042237	+	LOC105057960	antisense-overlapped	antisense-overlapped	NC_026007.1	5040667	5042645	-	XP_010939000.1	PREDICTED: cysteine-rich and transmembrane domain-containing protein A [Elaeis guineensis]
MSTRG.33108	NAT-lncRNA	III	NC_026007.1	6119427	6124852	+	LOC105057973	antisense-overlapped	not overlapped	NC_026007.1	6101197	6127183	-	XP_010939023.2	PREDICTED: pentatricopeptide repeat-containing protein At2g01390 [Elaeis guineensis]
MSTRG.33243	NAT-lncRNA	I	NC_026007.1	9723898	9738764	-	LOC105058072	antisense-overlapped	antisense-overlapped	NC_026007.1	9738635	9749321	+	XP_019710693.1	PREDICTED: LOW QUALITY PROTEIN: metal transporter Nramp3-like [Elaeis guineensis]
MSTRG.33284	NAT-lncRNA	III	NC_026007.1	10312520	10316122	+	LOC105058097	antisense-overlapped	not overlapped	NC_026007.1	10299811	10318179	-	XP_010939191.1	PREDICTED: uncharacterized protein LOC105058097 [Elaeis guineensis]
MSTRG.33465	NAT-lncRNA	III	NC_026007.1	13239018	13247763	+	LOC105058191	antisense-overlapped	not overlapped	NC_026007.1	13232928	13248846	-	XP_010939343.1	PREDICTED: GTP-binding protein At3g49725, chloroplastic [Elaeis guineensis]
MSTRG.33847	NAT-lncRNA	II	NC_026007.1	18792806	18794426	+	LOC105058481	antisense-overlapped	antisense-overlapped	NC_026007.1	18794041	18795074	-	XP_010939733.1	PREDICTED: uncharacterized protein LOC105058481 [Elaeis guineensis]
MSTRG.33901	NAT-lncRNA	II	NC_026007.1	19434480	19437803	-	LOC105058552	antisense-overlapped	antisense-overlapped	NC_026007.1	19431801	19434822	+	XP_010939813.1	PREDICTED: cyclic dof factor 3-like [Elaeis guineensis]
MSTRG.34004	NAT-lncRNA	II	NC_026007.1	20571214	20573507	+	LOC105058620	antisense-overlapped	antisense-overlapped	NC_026007.1	20573321	20578117	-	XP_010939901.1	PREDICTED: serine/threonine-protein kinase RIPK-like [Elaeis guineensis]
MSTRG.34038	NAT-lncRNA	I	NC_026007.1	21078567	21083861	-	LOC105058640	antisense-overlapped	not overlapped	NC_026007.1	21083607	21085059	+	pseudogene	protein BIG GRAIN 1-like
MSTRG.34105	NAT-lncRNA	III	NC_026007.1	21975969	21979578	+	LOC105058689	antisense-overlapped	not overlapped	NC_026007.1	21974030	22022024	-	XP_010940001.2	PREDICTED: THO complex subunit 2-like isoform X2 [Elaeis guineensis]
MSTRG.34163	NAT-lncRNA	III	NC_026007.1	22654223	22654476	+	LOC105058724	antisense-overlapped	antisense-overlapped	NC_026007.1	22649068	22654693	-	XP_010940042.1	PREDICTED: probable glycosyltransferase At5g03795 [Elaeis guineensis]
MSTRG.34338	NAT-lncRNA	III	NC_026008.1	664759	665554	+	LOC105059165	antisense-overlapped	not overlapped	NC_026008.1	659764	672992	-	XP_010940691.1	PREDICTED: FAD synthase isoform X2 [Elaeis guineensis]
MSTRG.34587	NAT-lncRNA	III	NC_026008.1	3366308	3368618	-	LOC105058990	antisense-overlapped	not overlapped	NC_026008.1	3361585	3373284	+	XP_010940402.1	PREDICTED: sucrose transport protein SUT4 isoform X1 [Elaeis guineensis]
MSTRG.34860	NAT-lncRNA	III	NC_026008.1	7722020	7723137	+	LOC105059275	antisense-overlapped	antisense-overlapped	NC_026008.1	7721427	7731572	-	XP_010940819.1	PREDICTED: syntaxin-41 [Elaeis guineensis]
MSTRG.34907	NAT-lncRNA	II	NC_026008.1	9227316	9228974	-	LOC105059294	antisense-overlapped	antisense-overlapped	NC_026008.1	9202773	9228575	+	XP_010940846.1	PREDICTED: polyadenylate-binding protein-interacting protein 11-like isoform X1 [Elaeis guineensis]
MSTRG.34917	NAT-lncRNA	III	NC_026008.1	9825585	9825856	+	LOC105059307	antisense-overlapped	antisense-overlapped	NC_026008.1	9823517	9845032	-	XP_019711090.1	PREDICTED: LOW QUALITY PROTEIN: RNA-binding protein 1-like [Elaeis guineensis]
MSTRG.34979	NAT-lncRNA	III	NC_026008.1	11095853	11097751	+	LOC105059337	antisense-overlapped	not overlapped	NC_026008.1	11093756	11190877	-	XP_010940901.1	PREDICTED: uncharacterized protein LOC105059337 isoform X1 [Elaeis guineensis]
MSTRG.34996	NAT-lncRNA	III	NC_026008.1	11455271	11465774	+	LOC105059344	antisense-overlapped	not overlapped	NC_026008.1	11453088	11467403	-	pseudogene	cytochrome P450 704C1-like
MSTRG.35117	NAT-lncRNA	III	NC_026008.1	14679282	14679836	+	LOC105059423	antisense-overlapped	antisense-overlapped	NC_026008.1	14657450	14716540	-	XP_019710941.1	PREDICTED: uncharacterized protein LOC105059423 [Elaeis guineensis]
MSTRG.35120	NAT-lncRNA	III	NC_026008.1	14745299	14750767	+	LOC105059427	antisense-overlapped	not overlapped	NC_026008.1	14742821	14752804	-	XP_010941022.1	PREDICTED: casein kinase II subunit beta-1-like [Elaeis guineensis]
MSTRG.35147	NAT-lncRNA	III	NC_026008.1	15184621	15184904	+	LOC105059446	antisense-overlapped	antisense-overlapped	NC_026008.1	15184447	15185530	-	XP_010941041.2	PREDICTED: WAS/WASL-interacting protein family member 3, partial [Elaeis guineensis]
MSTRG.35281	NAT-lncRNA	III	NC_026008.1	17512988	17513376	+	LOC105059518	antisense-overlapped	antisense-overlapped	NC_026008.1	17504629	17513400	-	XP_010941145.1	PREDICTED: uncharacterized protein LOC105059518 isoform X2 [Elaeis guineensis]
MSTRG.35285	NAT-lncRNA	I	NC_026008.1	17577287	17590589	+	LOC109506730	antisense-overlapped	not overlapped	NC_026008.1	17575229	17578312	-	XP_019710944.1	PREDICTED: NO-associated protein 1, chloroplastic/mitochondrial-like, partial [Elaeis guineensis]
MSTRG.35285	NAT-lncRNA	IV	NC_026008.1	17577287	17590589	+	LOC109506743	antisense-overlapped	not overlapped	NC_026008.1	17578397	17580067	-	XP_019711088.1	PREDICTED: RNA-binding protein 48-like [Elaeis guineensis]
MSTRG.35285	NAT-lncRNA	II	NC_026008.1	17577287	17590589	+	LOC105059520	antisense-overlapped	not overlapped	NC_026008.1	17588178	17591251	-	XP_019711087.1	PREDICTED: putative nitric oxide synthase [Elaeis guineensis]
MSTRG.35315	NAT-lncRNA	II	NC_026008.1	17934490	17938326	+	LOC105059537	antisense-overlapped	antisense-overlapped	NC_026008.1	17935226	17942756	-	XP_010941166.1	PREDICTED: homeobox protein BEL1 homolog [Elaeis guineensis]
MSTRG.35480	NAT-lncRNA	III	NC_026008.1	19842521	19842783	-	LOC105059625	antisense-overlapped	not overlapped	NC_026008.1	19839978	19847006	+	XP_010941298.1	PREDICTED: acyl-CoA-binding domain-containing protein 3 isoform X2 [Elaeis guineensis]
MSTRG.35578	NAT-lncRNA	III	NC_026008.1	21260803	21261936	+	LOC105059698	antisense-overlapped	antisense-overlapped	NC_026008.1	21259956	21270270	-	XP_010941413.1	PREDICTED: protein LAZ1-like isoform X1 [Elaeis guineensis]
MSTRG.35915	NAT-lncRNA	II	NW_011550905.1	5435939	5495393	-	LOC105059928	antisense-overlapped	not overlapped	NW_011550905.1	5434970	5449946	+	XP_019711100.1	PREDICTED: uncharacterized protein LOC105059928 isoform X1 [Elaeis guineensis]
MSTRG.35915	NAT-lncRNA	I	NW_011550905.1	5435939	5495393	-	LOC105059931	antisense-overlapped	not overlapped	NW_011550905.1	5492503	5506232	+	XP_019711222.1	PREDICTED: aldo-keto reductase-like isoform X2 [Elaeis guineensis]
MSTRG.35920	NAT-lncRNA	III	NW_011550905.1	5554467	5554989	+	LOC105059932	antisense-overlapped	antisense-overlapped	NW_011550905.1	5553394	5558644	-	XP_010941756.1	PREDICTED: putative disease resistance protein RGA1 isoform X2 [Elaeis guineensis]
MSTRG.35979	NAT-lncRNA	III	NW_011550905.1	6337109	6339466	-	LOC105059956	antisense-overlapped	not overlapped	NW_011550905.1	6325716	6340678	+	XP_010941801.1	PREDICTED: E3 ubiquitin-protein ligase MIEL1 [Elaeis guineensis]
MSTRG.36033	NAT-lncRNA	I	NW_011550906.1	977388	1022567	+	LOC105060024	antisense-overlapped	antisense-overlapped	NW_011550906.1	972315	994386	-	XP_019711271.1	PREDICTED: disease resistance protein RGA2-like [Elaeis guineensis]
MSTRG.36033	NAT-lncRNA	II	NW_011550906.1	977388	1022567	+	LOC105060122	antisense-overlapped	antisense-overlapped	NW_011550906.1	1019458	1039833	-	XP_010942040.2	PREDICTED: putative disease resistance protein RGA3 [Elaeis guineensis]
MSTRG.36240	NAT-lncRNA	III	NW_011550907.1	390589	391710	-	LOC105060156	antisense-overlapped	not overlapped	NW_011550907.1	387223	402585	+	XP_019701271.1	PREDICTED: probable protein phosphatase 2C 11 isoform X2 [Elaeis guineensis]
MSTRG.36276	NAT-lncRNA	III	NW_011550907.1	702581	707914	-	LOC105060173	antisense-overlapped	antisense-overlapped	NW_011550907.1	702020	708553	+	XP_010942083.1	PREDICTED: BTB/POZ domain-containing protein NPY1-like [Elaeis guineensis]
MSTRG.36289	NAT-lncRNA	III	NW_011550907.1	865663	872488	+	LOC105060183	antisense-overlapped	antisense-overlapped	NW_011550907.1	861245	880839	-	XP_010942095.1	PREDICTED: uncharacterized protein LOC105060183 [Elaeis guineensis]
MSTRG.36366	NAT-lncRNA	I	NW_011550907.1	1995690	2024295	-	LOC105060223	antisense-overlapped	not overlapped	NW_011550907.1	2019338	2027117	+	XP_010942136.1	PREDICTED: Golgi SNAP receptor complex member 1-1 isoform X2 [Elaeis guineensis]
MSTRG.36366	NAT-lncRNA	IV	NW_011550907.1	1995690	2024295	-	LOC105060222	antisense-overlapped	not overlapped	NW_011550907.1	1997061	2007635	+	XP_010942133.1	PREDICTED: 26S protease regulatory subunit 6A homolog [Elaeis guineensis]
MSTRG.36391	NAT-lncRNA	III	NW_011550907.1	2276076	2276368	-	LOC105060236	antisense-overlapped	antisense-overlapped	NW_011550907.1	2276026	2277264	+	XP_010942151.1	PREDICTED: zyxin [Elaeis guineensis]
MSTRG.36420	NAT-lncRNA	III	NW_011550907.1	2728912	2729806	+	LOC105060256	antisense-overlapped	antisense-overlapped	NW_011550907.1	2728285	2744163	-	XP_019711316.1	PREDICTED: uncharacterized protein LOC105060256 [Elaeis guineensis]
MSTRG.36464	NAT-lncRNA	II	NW_011550907.1	3508557	3515741	-	LOC105060285	antisense-overlapped	antisense-overlapped	NW_011550907.1	3508304	3513880	+	XP_010942235.1	PREDICTED: TNF receptor-associated factor family protein DDB_G0272829 isoform X1 [Elaeis guineensis]
MSTRG.36586	NAT-lncRNA	III	NW_011550908.1	1901840	1902180	+	LOC105060367	antisense-overlapped	antisense-overlapped	NW_011550908.1	1901137	1910558	-	XP_010942336.1	PREDICTED: multiple organellar RNA editing factor 8, chloroplastic/mitochondrial [Elaeis guineensis]
MSTRG.36845	NAT-lncRNA	III	NW_011550910.1	1545075	1545595	-	LOC105060541	antisense-overlapped	not overlapped	NW_011550910.1	1542616	1547662	+	XP_010942605.1	PREDICTED: uncharacterized protein LOC105060541 [Elaeis guineensis]
MSTRG.37087	NAT-lncRNA	III	NW_011550912.1	958714	959079	+	LOC105060685	antisense-overlapped	antisense-overlapped	NW_011550912.1	956128	959315	-	XP_010942787.1	PREDICTED: protein SHORT-ROOT 1-like [Elaeis guineensis]
MSTRG.37114	NAT-lncRNA	III	NW_011550912.1	1862667	1862987	-	LOC105060696	antisense-overlapped	antisense-overlapped	NW_011550912.1	1862632	1895408	+	XP_010942801.1	PREDICTED: calcium-transporting ATPase 1, plasma membrane-type-like isoform X1 [Elaeis guineensis]
MSTRG.37145	NAT-lncRNA	I	NW_011550913.1	159084	342454	+	LOC105060735	antisense-overlapped	antisense-overlapped	NW_011550913.1	158418	183819	-	XP_019701414.1	PREDICTED: uncharacterized protein LOC105060735 isoform X1 [Elaeis guineensis]
MSTRG.37145	NAT-lncRNA	IV	NW_011550913.1	159084	342454	+	LOC105060783	antisense-overlapped	not overlapped	NW_011550913.1	205788	227132	-	XP_010942922.1	PREDICTED: probable disease resistance protein RF9 [Elaeis guineensis]
MSTRG.37145	NAT-lncRNA	II	NW_011550913.1	159084	342454	+	LOC105060785	antisense-overlapped	antisense-overlapped	NW_011550913.1	340470	361581	-	XP_019701418.1	PREDICTED: uncharacterized protein LOC105060785 [Elaeis guineensis]
MSTRG.37249	NAT-lncRNA	III	NW_011550914.1	547018	547979	+	LOC105060810	antisense-overlapped	antisense-overlapped	NW_011550914.1	537460	550939	-	XP_019701453.1	PREDICTED: LOW QUALITY PROTEIN: putative disease resistance protein RGA3 [Elaeis guineensis]
MSTRG.37381	NAT-lncRNA	II	NW_011550915.1	513938	686375	+	LOC105060872	antisense-overlapped	antisense-overlapped	NW_011550915.1	686073	738800	-	XP_010943028.1	PREDICTED: prostaglandin reductase-3-like [Elaeis guineensis]
MSTRG.37381	NAT-lncRNA	IV	NW_011550915.1	513938	686375	+	LOC105060936	antisense-overlapped	not overlapped	NW_011550915.1	518473	576632	-	XP_019701460.1	PREDICTED: prostaglandin reductase-3-like [Elaeis guineensis]
MSTRG.37446	NAT-lncRNA	II	NW_011550915.1	1817289	1818492	+	LOC105060911	antisense-overlapped	antisense-overlapped	NW_011550915.1	1818414	1835982	-	XP_019701478.1	PREDICTED: phosphopantothenate--cysteine ligase 2 isoform X3 [Elaeis guineensis]
MSTRG.37576	NAT-lncRNA	III	NW_011550917.1	461386	461696	+	LOC105060999	antisense-overlapped	antisense-overlapped	NW_011550917.1	460913	462567	-	XP_010943207.1	PREDICTED: transcription factor MYB44-like [Elaeis guineensis]
MSTRG.37579	NAT-lncRNA	III	NW_011550917.1	483640	485062	-	LOC105061000	antisense-overlapped	not overlapped	NW_011550917.1	481467	485736	+	XP_010943208.1	PREDICTED: PRKR-interacting protein 1 [Elaeis guineensis]
MSTRG.37584	NAT-lncRNA	III	NW_011550917.1	572821	574153	+	LOC105061004	antisense-overlapped	not overlapped	NW_011550917.1	563384	577506	-	XP_010943216.1	PREDICTED: RNA pseudouridine synthase 4, mitochondrial isoform X2 [Elaeis guineensis]
MSTRG.37721	NAT-lncRNA	III	NW_011550918.1	1788738	1789550	-	LOC105061090	antisense-overlapped	not overlapped	NW_011550918.1	1785271	1810898	+	XP_010943345.1	PREDICTED: DNA-directed RNA polymerase 2B, chloroplastic/mitochondrial isoform X1 [Elaeis guineensis]
MSTRG.37775	NAT-lncRNA	III	NW_011550919.1	1556909	1557298	-	LOC105061132	antisense-overlapped	antisense-overlapped	NW_011550919.1	1556868	1578595	+	XP_010943395.1	PREDICTED: uncharacterized protein LOC105061132 isoform X2 [Elaeis guineensis]
MSTRG.37787	NAT-lncRNA	III	NW_011550919.1	1923787	1924958	+	LOC105061136	antisense-overlapped	not overlapped	NW_011550919.1	1917974	1934598	-	XP_010943403.1	PREDICTED: glycerol-3-phosphate dehydrogenase SDP6, mitochondrial [Elaeis guineensis]
MSTRG.37859	NAT-lncRNA	III	NW_011550920.1	1826100	1827115	+	LOC105061173	antisense-overlapped	antisense-overlapped	NW_011550920.1	1825294	1827358	-	XP_010943447.1	PREDICTED: FAS1 domain-containing protein SELMODRAFT_448915-like [Elaeis guineensis]
MSTRG.37896	NAT-lncRNA	II	NW_011550921.1	907768	912921	-	LOC105061193	antisense-overlapped	antisense-overlapped	NW_011550921.1	902420	911859	+	XP_010943470.1	PREDICTED: dnaJ homolog subfamily C member 17 isoform X2 [Elaeis guineensis]
MSTRG.38015	NAT-lncRNA	III	NW_011550922.1	1286494	1289616	-	LOC105061255	antisense-overlapped	not overlapped	NW_011550922.1	1285367	1293873	+	XP_010943549.1	PREDICTED: squamosa promoter-binding-like protein 14 isoform X1 [Elaeis guineensis]
MSTRG.38283	NAT-lncRNA	I	NW_011550927.1	959977	961309	+	LOC105061384	antisense-overlapped	antisense-overlapped	NW_011550927.1	944326	960344	-	XP_010943709.1	PREDICTED: protein HIRA isoform X1 [Elaeis guineensis]
MSTRG.38339	NAT-lncRNA	III	NW_011550928.1	1004653	1013285	+	LOC105061404	antisense-overlapped	not overlapped	NW_011550928.1	973339	1048658	-	XP_010943740.1	PREDICTED: uncharacterized protein At2g33490-like isoform X3 [Elaeis guineensis]
MSTRG.38436	NAT-lncRNA	III	NW_011550930.1	594028	595777	+	LOC105061459	antisense-overlapped	not overlapped	NW_011550930.1	572173	611913	-	XP_010943811.1	PREDICTED: probable UDP-N-acetylglucosamine--peptide N-acetylglucosaminyltransferase SPINDLY [Elaeis guineensis]
MSTRG.38982	NAT-lncRNA	IV	NW_011550942.1	872438	964889	-	LOC105032090	antisense-overlapped	not overlapped	NW_011550942.1	936315	940613	+	XP_019701713.1	PREDICTED: histone H3-like centromeric protein HTR12 isoform X1 [Elaeis guineensis]
MSTRG.39026	NAT-lncRNA	II	NW_011550943.1	403155	424575	-	LOC105032120	antisense-overlapped	not overlapped	NW_011550943.1	389194	412234	+	XP_019701740.1	PREDICTED: LOW QUALITY PROTEIN: acyltransferase-like protein At1g54570, chloroplastic [Elaeis guineensis]
MSTRG.39026	NAT-lncRNA	IV	NW_011550943.1	403155	424575	-	LOC105032119	antisense-overlapped	not overlapped	NW_011550943.1	411369	412235	+	XP_019701737.1	PREDICTED: thyroid transcription factor 1-associated protein 26-like [Elaeis guineensis]
MSTRG.39026	NAT-lncRNA	I	NW_011550943.1	403155	424575	-	LOC105032122	antisense-overlapped	not overlapped	NW_011550943.1	412911	425462	+	XP_010904777.1	PREDICTED: thyroid transcription factor 1-associated protein 26 isoform X1 [Elaeis guineensis]
MSTRG.39027	NAT-lncRNA	II	NW_011550943.1	411648	424990	-	LOC105032120	antisense-overlapped	not overlapped	NW_011550943.1	389194	412234	+	XP_019701740.1	PREDICTED: LOW QUALITY PROTEIN: acyltransferase-like protein At1g54570, chloroplastic [Elaeis guineensis]
MSTRG.39027	NAT-lncRNA	II	NW_011550943.1	411648	424990	-	LOC105032119	antisense-overlapped	not overlapped	NW_011550943.1	411369	412235	+	XP_019701737.1	PREDICTED: thyroid transcription factor 1-associated protein 26-like [Elaeis guineensis]
MSTRG.39027	NAT-lncRNA	I	NW_011550943.1	411648	424990	-	LOC105032122	antisense-overlapped	not overlapped	NW_011550943.1	412911	425462	+	XP_010904777.1	PREDICTED: thyroid transcription factor 1-associated protein 26 isoform X1 [Elaeis guineensis]
MSTRG.39251	NAT-lncRNA	III	NW_011550947.1	558133	558517	+	LOC105032269	antisense-overlapped	antisense-overlapped	NW_011550947.1	557744	559423	-	XP_010904968.1	PREDICTED: geranylgeranyl diphosphate reductase, chloroplastic-like [Elaeis guineensis]
MSTRG.39394	NAT-lncRNA	III	NW_011550950.1	1073611	1083394	-	LOC105032328	antisense-overlapped	antisense-overlapped	NW_011550950.1	1049937	1142070	+	XP_010905047.1	PREDICTED: probable serine/threonine-protein kinase PIX13 isoform X4 [Elaeis guineensis]
MSTRG.39439	NAT-lncRNA	III	NW_011550952.1	874647	875430	-	LOC105032343	antisense-overlapped	not overlapped	NW_011550952.1	858928	878231	+	XP_010905077.1	PREDICTED: probable protein phosphatase 2C 55 [Elaeis guineensis]
MSTRG.39578	NAT-lncRNA	IV	NW_011550955.1	195888	199529	-	LOC105032425	antisense-overlapped	not overlapped	NW_011550955.1	197818	198898	+	XP_010905172.1	PREDICTED: probable methyltransferase At1g27930 [Elaeis guineensis]
MSTRG.39745	NAT-lncRNA	II	NW_011550959.1	245674	255829	+	LOC105032510	antisense-overlapped	antisense-overlapped	NW_011550959.1	246779	257317	-	XP_010905270.1	PREDICTED: uncharacterized protein LOC105032510 [Elaeis guineensis]
MSTRG.39980	NAT-lncRNA	III	NW_011550964.1	1107719	1108273	+	LOC105032616	antisense-overlapped	not overlapped	NW_011550964.1	1107531	1114647	-	XP_019701910.1	PREDICTED: uncharacterized protein LOC105032616 isoform X1 [Elaeis guineensis]
MSTRG.40145	NAT-lncRNA	III	NW_011550970.1	657862	662116	+	LOC105032667	antisense-overlapped	not overlapped	NW_011550970.1	648156	671520	-	XP_010905480.1	PREDICTED: SPX and EXS domain-containing protein 1 isoform X2 [Elaeis guineensis]
MSTRG.40199	NAT-lncRNA	III	NW_011550971.1	869246	872403	+	LOC105032695	antisense-overlapped	not overlapped	NW_011550971.1	847492	876731	-	pseudogene	F-box only protein 6-like
MSTRG.40254	NAT-lncRNA	III	NW_011550973.1	1064494	1067051	-	LOC105032725	antisense-overlapped	not overlapped	NW_011550973.1	1063445	1068227	+	XP_010905553.1	PREDICTED: uncharacterized protein LOC105032725 isoform X2 [Elaeis guineensis]
MSTRG.40337	NAT-lncRNA	III	NW_011550976.1	401486	402641	-	LOC105032776	antisense-overlapped	not overlapped	NW_011550976.1	392044	407841	+	XP_010905640.1	PREDICTED: DNA polymerase kappa isoform X1 [Elaeis guineensis]
MSTRG.40401	NAT-lncRNA	III	NW_011550978.1	777407	778267	-	LOC105032799	antisense-overlapped	not overlapped	NW_011550978.1	759869	791121	+	XP_010905668.1	PREDICTED: plant-specific TFIIB-related protein 1-like [Elaeis guineensis]
MSTRG.40439	NAT-lncRNA	III	NW_011550980.1	32022	38180	+	LOC105032828	antisense-overlapped	not overlapped	NW_011550980.1	27855	51110	-	XP_019702017.1	PREDICTED: sulfate transporter 4.1, chloroplastic-like isoform X2 [Elaeis guineensis]
MSTRG.40538	NAT-lncRNA	III	NW_011550982.1	801718	807269	-	LOC105032861	antisense-overlapped	not overlapped	NW_011550982.1	778525	813909	+	XP_010905742.1	PREDICTED: uncharacterized protein LOC105032861 isoform X1 [Elaeis guineensis]
MSTRG.40766	NAT-lncRNA	III	NW_011550991.1	141183	143941	-	LOC105032991	antisense-overlapped	not overlapped	NW_011550991.1	85803	186936	+	XP_019702060.1	PREDICTED: protein DETOXIFICATION 29 isoform X1 [Elaeis guineensis]
MSTRG.40949	NAT-lncRNA	III	NW_011550997.1	355681	356077	-	LOC105033083	antisense-overlapped	antisense-overlapped	NW_011550997.1	355151	356281	+	XP_010906039.1	PREDICTED: histone H1-like [Elaeis guineensis]
MSTRG.40980	NAT-lncRNA	III	NW_011550999.1	751000	754419	+	LOC105033092	antisense-overlapped	not overlapped	NW_011550999.1	749799	777395	-	XP_019702089.1	PREDICTED: ATP-dependent Clp protease ATP-binding subunit CLPT1, chloroplastic-like [Elaeis guineensis]
MSTRG.40996	NAT-lncRNA	III	NW_011551001.1	110982	121832	+	LOC105033109	antisense-overlapped	not overlapped	NW_011551001.1	109168	124008	-	XP_019702097.1	PREDICTED: uncharacterized protein LOC105033109 isoform X2 [Elaeis guineensis]
MSTRG.41008	NAT-lncRNA	I	NW_011551001.1	409962	410445	+	LOC105033114	antisense-overlapped	antisense-overlapped	NW_011551001.1	392593	410124	-	XP_010906076.1	PREDICTED: protein DETOXIFICATION 42 isoform X2 [Elaeis guineensis]
MSTRG.41128	NAT-lncRNA	III	NW_011551006.1	576441	576748	-	LOC105033161	antisense-overlapped	antisense-overlapped	NW_011551006.1	567629	576758	+	XP_010906147.2	PREDICTED: putative disease resistance protein RGA3 [Elaeis guineensis]
MSTRG.41131	NAT-lncRNA	I	NW_011551006.1	600332	654435	-	LOC105033164	antisense-overlapped	antisense-overlapped	NW_011551006.1	635198	655370	+	XP_010906151.1	PREDICTED: putative disease resistance protein RGA3 [Elaeis guineensis]
MSTRG.41330	NAT-lncRNA	I	NW_011551013.1	341770	342052	-	LOC105033284	antisense-overlapped	antisense-overlapped	NW_011551013.1	341968	350513	+	XP_010906321.1	PREDICTED: anthranilate synthase beta subunit 2, chloroplastic [Elaeis guineensis]
MSTRG.41474	NAT-lncRNA	III	NW_011551019.1	357259	367421	+	LOC105033346	antisense-overlapped	not overlapped	NW_011551019.1	348189	407859	-	XP_010906408.1	PREDICTED: protein DGS1, mitochondrial [Elaeis guineensis]
MSTRG.41529	NAT-lncRNA	III	NW_011551022.1	252970	254506	+	LOC105033370	antisense-overlapped	not overlapped	NW_011551022.1	248871	272071	-	XP_010906441.1	PREDICTED: peptidyl-tRNA hydrolase ICT1, mitochondrial-like isoform X2 [Elaeis guineensis]
MSTRG.41564	NAT-lncRNA	III	NW_011551023.1	109722	110806	-	LOC105033375	antisense-overlapped	not overlapped	NW_011551023.1	46912	209432	+	XP_010906444.1	PREDICTED: CSC1-like protein At3g54510 isoform X1 [Elaeis guineensis]
MSTRG.41661	NAT-lncRNA	III	NW_011551028.1	90660	91861	-	LOC105033410	antisense-overlapped	not overlapped	NW_011551028.1	85756	95578	+	XP_010906496.1	PREDICTED: 4-hydroxy-3-methylbut-2-en-1-yl diphosphate synthase (ferredoxin), chloroplastic [Elaeis guineensis]
MSTRG.42057	NAT-lncRNA	III	NW_011551047.1	191634	197936	+	LOC105033667	antisense-overlapped	antisense-overlapped	NW_011551047.1	181153	208451	-	XP_019702285.1	PREDICTED: MLO-like protein 7 [Elaeis guineensis]
MSTRG.42109	NAT-lncRNA	III	NW_011551049.1	454198	456124	+	LOC105033691	antisense-overlapped	not overlapped	NW_011551049.1	449711	457119	-	XP_010906887.1	PREDICTED: protein trichome birefringence-like 11 [Elaeis guineensis]
MSTRG.42172	NAT-lncRNA	III	NW_011551054.1	38968	39399	+	LOC105033740	antisense-overlapped	antisense-overlapped	NW_011551054.1	38478	66123	-	XP_010906946.1	PREDICTED: probable serine/threonine-protein kinase WNK3 isoform X1 [Elaeis guineensis]
MSTRG.42622	NAT-lncRNA	III	NW_011551080.1	429207	429632	+	LOC109505015	antisense-overlapped	antisense-overlapped	NW_011551080.1	428706	432666	-	XP_019702378.1	PREDICTED: LOW QUALITY PROTEIN: uncharacterized protein LOC109505015 [Elaeis guineensis]
MSTRG.42926	NAT-lncRNA	III	NW_011551101.1	139857	140232	+	LOC105034047	antisense-overlapped	antisense-overlapped	NW_011551101.1	112904	140362	-	XP_010907371.1	PREDICTED: epidermal growth factor receptor substrate 15-like 1 isoform X2 [Elaeis guineensis]
MSTRG.43006	NAT-lncRNA	III	NW_011551108.1	149316	149646	+	LOC105034079	antisense-overlapped	antisense-overlapped	NW_011551108.1	149106	161364	-	XP_010907403.1	PREDICTED: calcium-dependent protein kinase 3 [Elaeis guineensis]
MSTRG.43087	NAT-lncRNA	II	NW_011551115.1	379210	399054	+	LOC105034124	antisense-overlapped	antisense-overlapped	NW_011551115.1	385242	401796	-	XP_010907466.1	PREDICTED: uncharacterized protein LOC105034124 [Elaeis guineensis]
MSTRG.43297	NAT-lncRNA	I	NW_011551127.1	273725	312399	-	LOC105034191	antisense-overlapped	antisense-overlapped	NW_011551127.1	308794	313181	+	XP_010907546.1	PREDICTED: uncharacterized protein LOC105034191 [Elaeis guineensis]
MSTRG.43342	NAT-lncRNA	III	NW_011551132.1	100083	100955	+	LOC105034222	antisense-overlapped	not overlapped	NW_011551132.1	99433	112995	-	XP_019702471.1	PREDICTED: probable glucuronosyltransferase Os03g0107900 [Elaeis guineensis]
MSTRG.43942	NAT-lncRNA	III	NW_011551179.1	71053	74823	-	LOC105034400	antisense-overlapped	not overlapped	NW_011551179.1	46648	100208	+	XP_010907847.1	PREDICTED: putative F-box/LRR-repeat protein 23 [Elaeis guineensis]
MSTRG.44312	NAT-lncRNA	III	NW_011551230.1	148027	151361	+	LOC105034566	antisense-overlapped	antisense-overlapped	NW_011551230.1	147598	158751	-	XP_010908078.1	PREDICTED: uncharacterized protein LOC105034566 [Elaeis guineensis]
MSTRG.44349	NAT-lncRNA	III	NW_011551234.1	68326	74522	-	LOC105034584	antisense-overlapped	not overlapped	NW_011551234.1	13596	80178	+	XP_010908098.1	PREDICTED: molybdate-anion transporter-like [Elaeis guineensis]
MSTRG.44933	NAT-lncRNA	III	NW_011551310.1	206301	206601	+	LOC105034774	antisense-overlapped	antisense-overlapped	NW_011551310.1	204530	211071	-	XP_019702651.1	PREDICTED: ABC transporter G family member 15 [Elaeis guineensis]
MSTRG.45310	NAT-lncRNA	III	NW_011551361.1	135854	139706	-	LOC105034902	antisense-overlapped	not overlapped	NW_011551361.1	87323	144173	+	XP_010908524.1	PREDICTED: vacuolar protein sorting-associated protein 8 homolog isoform X1 [Elaeis guineensis]
MSTRG.45425	NAT-lncRNA	I	NW_011551377.1	84156	86286	-	LOC105034929	antisense-overlapped	antisense-overlapped	NW_011551377.1	86041	99471	+	XP_010908565.1	PREDICTED: FKBP12-interacting protein of 37 kDa isoform X1 [Elaeis guineensis]
MSTRG.45485	NAT-lncRNA	III	NW_011551386.1	146517	146915	+	LOC105034952	antisense-overlapped	antisense-overlapped	NW_011551386.1	146221	194680	-	XP_010908611.1	PREDICTED: endoplasmic reticulum-Golgi intermediate compartment protein 3 [Elaeis guineensis]
MSTRG.45520	NAT-lncRNA	III	NW_011551395.1	53890	79206	-	LOC105034963	antisense-overlapped	not overlapped	NW_011551395.1	36694	155205	+	XP_010908624.1	PREDICTED: uncharacterized protein LOC105034963 isoform X1 [Elaeis guineensis]
MSTRG.45676	NAT-lncRNA	III	NW_011551429.1	56614	57855	+	LOC105035016	antisense-overlapped	antisense-overlapped	NW_011551429.1	37997	58035	-	XP_019702739.1	PREDICTED: casein kinase 1-like protein HD16 [Elaeis guineensis]
MSTRG.46169	NAT-lncRNA	III	NW_011551554.1	74773	75342	+	LOC105035197	antisense-overlapped	not overlapped	NW_011551554.1	20637	77342	-	XP_010908949.1	PREDICTED: DNA polymerase epsilon catalytic subunit A-like isoform X1 [Elaeis guineensis]
MSTRG.47162	NAT-lncRNA	III	NW_011551842.1	185751	188107	-	LOC105035464	antisense-overlapped	not overlapped	NW_011551842.1	163925	196718	+	XP_019702907.1	PREDICTED: uncharacterized protein At2g33490-like [Elaeis guineensis]
MSTRG.47718	NAT-lncRNA	III	NW_011552065.1	86217	91016	-	LOC105035618	antisense-overlapped	not overlapped	NW_011552065.1	44372	92985	+	XP_010909530.1	PREDICTED: chlorophyll(ide) b reductase NOL, chloroplastic isoform X1 [Elaeis guineensis]
MSTRG.48487	NAT-lncRNA	III	NW_011552437.1	26753	27899	+	LOC105035794	antisense-overlapped	not overlapped	NW_011552437.1	21666	47604	-	XP_010909796.1	PREDICTED: jmjC domain-containing protein D-like isoform X2 [Elaeis guineensis]
MSTRG.48560	NAT-lncRNA	IV	NW_011552495.1	13796	59638	+	LOC109505170	antisense-overlapped	not overlapped	NW_011552495.1	42841	43450	-	pseudogene	uncharacterized LOC109505170
MSTRG.49416	NAT-lncRNA	IV	NW_011553157.1	14046	51727	-	LOC105036055	antisense-overlapped	antisense-overlapped	NW_011553157.1	29389	31374	+	XP_010910092.1	PREDICTED: transmembrane 9 superfamily member 12 [Elaeis guineensis]
MSTRG.49416	NAT-lncRNA	IV	NW_011553157.1	14046	51727	-	LOC105036058	antisense-overlapped	not overlapped	NW_011553157.1	34378	40348	+	XP_010910100.1	PREDICTED: uncharacterized protein LOC105036058 isoform X1 [Elaeis guineensis]
MSTRG.50200	NAT-lncRNA	III	NW_011554053.1	10048	10550	-	LOC105036226	antisense-overlapped	antisense-overlapped	NW_011554053.1	9545	10872	+	XP_019703134.1	PREDICTED: uncharacterized protein LOC105036226 [Elaeis guineensis]
MSTRG.50640	NAT-lncRNA	II	NW_011554942.1	11394	12619	-	LOC105036337	antisense-overlapped	antisense-overlapped	NW_011554942.1	858	11780	+	XP_010910412.1	PREDICTED: uncharacterized protein LOC105036337 isoform X2 [Elaeis guineensis]
MSTRG.52990	NAT-lncRNA	II	NW_011563579.1	273	1256	+	LOC105037020	antisense-overlapped	not overlapped	NW_011563579.1	1254	2208	-	XP_010911026.1	PREDICTED: uncharacterized protein LOC105037020 [Elaeis guineensis]
MSTRG.53238	NAT-lncRNA	I	NW_011564761.1	1783	2208	-	LOC105037085	antisense-overlapped	antisense-overlapped	NW_011564761.1	2003	2680	+	XP_010911090.1	PREDICTED: uncharacterized protein LOC105037085 [Elaeis guineensis]
MSTRG.54956	NAT-lncRNA	I	NW_011574043.1	1996	2573	+	LOC105037503	antisense-overlapped	antisense-overlapped	NW_011574043.1	4	2097	-	XP_010911459.2	PREDICTED: cysteine-rich receptor-like protein kinase 6, partial [Elaeis guineensis]
MSTRG.314	NAT-lncRNA	V	NC_025993.1	3106164	3108560	-	LOC105051257	antisense-overlapped within 2k promoter region	not overlapped	NC_025993.1	3109284	3112648	+	XP_019708085.1	PREDICTED: uncharacterized protein LOC105051257 isoform X1 [Elaeis guineensis]
MSTRG.339	NAT-lncRNA	VI	NC_025993.1	3352295	3355625	-	LOC105053482	antisense-overlapped within 2k downstream region	not overlapped	NC_025993.1	3338028	3350600	+	XP_019711210.1	PREDICTED: isochorismate synthase 2, chloroplastic isoform X1 [Elaeis guineensis]
MSTRG.449	NAT-lncRNA	VI	NC_025993.1	4590767	4592131	+	LOC105060069	antisense-overlapped within 2k downstream region	not overlapped	NC_025993.1	4592133	4593534	-	XP_010942001.1	PREDICTED: putative GATA transcription factor 22 [Elaeis guineensis]
MSTRG.952	NAT-lncRNA	VI	NC_025993.1	11656646	11659257	-	LOC105040870	antisense-overlapped within 2k downstream region	not overlapped	NC_025993.1	11651032	11656548	+	XP_010915914.2	PREDICTED: LOW QUALITY PROTEIN: mannan endo-1,4-beta-mannosidase 2-like [Elaeis guineensis]
MSTRG.1416	NAT-lncRNA	V	NC_025993.1	17906180	17906647	-	LOC105043239	antisense-overlapped within 2k promoter region	not overlapped	NC_025993.1	17906708	17917278	+	XP_010919045.1	PREDICTED: uncharacterized protein LOC105043239 isoform X1 [Elaeis guineensis]
MSTRG.1427	NAT-lncRNA	VI	NC_025993.1	17998166	17998477	+	LOC105043191	antisense-overlapped within 2k downstream region	not overlapped	NC_025993.1	17999911	18003061	-	XP_010918952.2	PREDICTED: LOW QUALITY PROTEIN: peroxidase 19 [Elaeis guineensis]
MSTRG.1562	NAT-lncRNA	V	NC_025993.1	19400543	19404060	+	LOC105049440	antisense-overlapped within 2k promoter region	not overlapped	NC_025993.1	19396163	19398583	-	XP_010927384.1	PREDICTED: muscle M-line assembly protein unc-89-like [Elaeis guineensis]
MSTRG.1825	NAT-lncRNA	VI	NC_025993.1	22172554	22186406	-	LOC105046747	antisense-overlapped within 2k downstream region	not overlapped	NC_025993.1	22169725	22172548	+	XP_010923744.1	PREDICTED: pentatricopeptide repeat-containing protein At1g71060, mitochondrial isoform X1 [Elaeis guineensis]
MSTRG.1825	NAT-lncRNA	V	NC_025993.1	22172554	22186406	-	LOC105046722	antisense-overlapped within 2k promoter region	not overlapped	NC_025993.1	22186605	22205715	+	XP_010923726.1	PREDICTED: uncharacterized protein LOC105046722 isoform X3 [Elaeis guineensis]
MSTRG.2400	NAT-lncRNA	VI	NC_025993.1	30676318	30682051	+	LOC105051626	antisense-overlapped within 2k downstream region	not overlapped	NC_025993.1	30682284	30687987	-	XP_010930462.1	PREDICTED: uncharacterized protein LOC105051626 [Elaeis guineensis]
MSTRG.2810	NAT-lncRNA	V	NC_025993.1	36757427	36764499	-	LOC105054520	antisense-overlapped within 2k promoter region	not overlapped	NC_025993.1	36765074	36794291	+	XP_010934354.1	PREDICTED: squalene synthase [Elaeis guineensis]
MSTRG.2876	NAT-lncRNA	V	NC_025993.1	37614906	37621465	+	LOC105054948	antisense-overlapped within 2k promoter region	not overlapped	NC_025993.1	37601147	37613565	-	XP_010934915.1	PREDICTED: zeta-carotene desaturase, chloroplastic/chromoplastic isoform X1 [Elaeis guineensis]
MSTRG.2883	NAT-lncRNA	VI	NC_025993.1	37724172	37725120	-	LOC105055004	antisense-overlapped within 2k downstream region	not overlapped	NC_025993.1	37690096	37723199	+	XP_010934993.1	PREDICTED: endoplasmic reticulum-Golgi intermediate compartment protein 3 [Elaeis guineensis]
MSTRG.3383	NAT-lncRNA	V	NC_025993.1	47150618	47176054	-	LOC105058624	antisense-overlapped within 2k promoter region	not overlapped	NC_025993.1	47176397	47192071	+	XP_019708667.1	PREDICTED: LOW QUALITY PROTEIN: transcription initiation factor TFIID subunit 4b-like [Elaeis guineensis]
MSTRG.3535	NAT-lncRNA	V	NC_025993.1	50597999	50598462	+	LOC105060195	antisense-overlapped within 2k promoter region	not overlapped	NC_025993.1	50594499	50597380	-	pseudogene	superoxide dismutase [Cu-Zn]-like
MSTRG.3706	NAT-lncRNA	V	NC_025993.1	55055419	55059707	-	LOC105060176	antisense-overlapped within 2k promoter region	not overlapped	NC_025993.1	55059917	55061766	+	XP_010942089.1	PREDICTED: protein PHLOEM PROTEIN 2-LIKE A10-like [Elaeis guineensis]
MSTRG.4042	NAT-lncRNA	VI	NC_025993.1	61991156	61991856	+	LOC105032496	antisense-overlapped within 2k downstream region	not overlapped	NC_025993.1	61992462	62002224	-	XP_010905257.1	PREDICTED: H/ACA ribonucleoprotein complex non-core subunit NAF1-like [Elaeis guineensis]
MSTRG.4063	NAT-lncRNA	VI	NC_025993.1	62286109	62292971	-	LOC105032708	antisense-overlapped within 2k downstream region	not overlapped	NC_025993.1	62275602	62284506	+	XP_010905531.1	PREDICTED: peptidyl-prolyl cis-trans isomerase CYP37, chloroplastic isoform X1 [Elaeis guineensis]
MSTRG.4453	NAT-lncRNA	V	NC_025994.1	3085213	3099322	-	LOC105034547	antisense-overlapped within 2k promoter region	not overlapped	NC_025994.1	3099506	3106219	+	XP_010908063.1	PREDICTED: COX assembly mitochondrial protein 2 homolog isoform X1 [Elaeis guineensis]
MSTRG.5324	NAT-lncRNA	VI	NC_025994.1	22666680	22696794	+	LOC105038282	antisense-overlapped within 2k downstream region	not overlapped	NC_025994.1	22697225	22698756	-	XP_010912338.1	PREDICTED: B3 domain-containing protein Os11g0156000-like [Elaeis guineensis]
MSTRG.5533	NAT-lncRNA	VI	NC_025994.1	25399121	25402226	-	LOC105038417	antisense-overlapped within 2k downstream region	not overlapped	NC_025994.1	25393131	25398227	+	XP_010912531.1	PREDICTED: protein FAM32A-like [Elaeis guineensis]
MSTRG.6066	NAT-lncRNA	VI	NC_025994.1	35140990	35141729	+	LOC105038837	antisense-overlapped within 2k downstream region	not overlapped	NC_025994.1	35143525	35149313	-	XP_010913051.1	PREDICTED: putative receptor-like protein kinase At4g00960 isoform X1 [Elaeis guineensis]
MSTRG.6151	NAT-lncRNA	VI	NC_025994.1	37504893	37506231	-	LOC105038885	antisense-overlapped within 2k downstream region	not overlapped	NC_025994.1	37486252	37503652	+	XP_010913107.1	PREDICTED: probable UDP-N-acetylglucosamine--peptide N-acetylglucosaminyltransferase SEC [Elaeis guineensis]
MSTRG.6678	NAT-lncRNA	VI	NC_025994.1	46042767	46044339	-	LOC105039228	antisense-overlapped within 2k downstream region	not overlapped	NC_025994.1	46033124	46041724	+	XP_010913610.1	PREDICTED: cyclic nucleotide-gated ion channel 17-like isoform X1 [Elaeis guineensis]
MSTRG.7095	NAT-lncRNA	VI	NC_025994.1	52001930	52005564	-	LOC105039431	antisense-overlapped within 2k downstream region	not overlapped	NC_025994.1	51992588	52001929	+	XP_010913868.1	PREDICTED: pyrophosphate--fructose 6-phosphate 1-phosphotransferase subunit alpha [Elaeis guineensis]
MSTRG.7095	NAT-lncRNA	V	NC_025994.1	52001930	52005564	-	LOC105039433	antisense-overlapped within 2k promoter region	not overlapped	NC_025994.1	52005630	52020345	+	XP_010913869.1	PREDICTED: brefeldin A-inhibited guanine nucleotide-exchange protein 1 isoform X1 [Elaeis guineensis]
MSTRG.7206	NAT-lncRNA	VI	NC_025994.1	53589301	53593253	+	LOC105039732	antisense-overlapped within 2k downstream region	not overlapped	NC_025994.1	53593276	53594175	-	XP_019702605.1	PREDICTED: glutamate receptor 2.8-like [Elaeis guineensis]
MSTRG.7564	NAT-lncRNA	V	NC_025994.1	59304592	59321181	+	LOC105040044	antisense-overlapped within 2k promoter region	not overlapped	NC_025994.1	59300120	59304224	-	XP_019703759.1	PREDICTED: subtilisin-like protease SBT1.5 [Elaeis guineensis]
MSTRG.7564	NAT-lncRNA	VI	NC_025994.1	59304592	59321181	+	LOC105039877	antisense-overlapped within 2k downstream region	not overlapped	NC_025994.1	59322223	59323408	-	XP_010914492.1	PREDICTED: ethylene-responsive transcription factor ERF115-like [Elaeis guineensis]
MSTRG.8192	NAT-lncRNA	VI	NC_025995.1	3343145	3347002	+	LOC105040321	antisense-overlapped within 2k downstream region	not overlapped	NC_025995.1	3348714	3351722	-	XP_010915111.1	PREDICTED: phosducin-like protein 3 [Elaeis guineensis]
MSTRG.9556	NAT-lncRNA	V	NC_025995.1	21622653	21623019	-	LOC109505632	antisense-overlapped within 2k promoter region	not overlapped	NC_025995.1	21624484	21625073	+	XP_019704716.1	PREDICTED: non-specific lipid-transfer protein 2-like [Elaeis guineensis]
MSTRG.10383	NAT-lncRNA	V	NC_025995.1	37257425	37266355	+	LOC105041976	antisense-overlapped within 2k promoter region	not overlapped	NC_025995.1	37247297	37257051	-	XP_010917360.1	PREDICTED: ubiquitin-conjugating enzyme E2 34 [Elaeis guineensis]
MSTRG.10432	NAT-lncRNA	V	NC_025995.1	38236224	38256786	-	LOC105042009	antisense-overlapped within 2k promoter region	not overlapped	NC_025995.1	38256989	38265156	+	XP_010917408.1	PREDICTED: KH domain-containing protein At4g18375 [Elaeis guineensis]
MSTRG.10957	NAT-lncRNA	V	NC_025995.1	53116163	53167989	-	LOC105042354	antisense-overlapped within 2k promoter region	not overlapped	NC_025995.1	53169440	53196151	+	pseudogene	sulfate transporter 3.1-like
MSTRG.11331	NAT-lncRNA	V	NC_025996.1	2276108	2703052	+	LOC109505773	antisense-overlapped within 2k promoter region	not overlapped	NC_025996.1	2272889	2274125	-	XP_019705566.1	PREDICTED: putative disease resistance protein RGA1 [Elaeis guineensis]
MSTRG.11474	NAT-lncRNA	V	NC_025996.1	6161550	6166274	+	LOC105042558	antisense-overlapped within 2k promoter region	not overlapped	NC_025996.1	6154889	6160836	-	XP_010918135.1	PREDICTED: calcium-dependent protein kinase 29 [Elaeis guineensis]
MSTRG.12384	NAT-lncRNA	VI	NC_025996.1	34108881	34112919	+	LOC105043126	antisense-overlapped within 2k downstream region	not overlapped	NC_025996.1	34114622	34120263	-	XP_019705760.1	PREDICTED: uncharacterized protein LOC105043126 isoform X4 [Elaeis guineensis]
MSTRG.12524	NAT-lncRNA	VI	NC_025996.1	36260435	36260954	-	LOC105043270	antisense-overlapped within 2k downstream region	not overlapped	NC_025996.1	36257543	36258487	+	XP_010919055.1	PREDICTED: 21 kDa protein [Elaeis guineensis]
MSTRG.12655	NAT-lncRNA	V	NC_025996.1	38260397	38261379	+	LOC105043335	antisense-overlapped within 2k promoter region	not overlapped	NC_025996.1	38257345	38259524	-	pseudogene	protein FAF-like, chloroplastic
MSTRG.12777	NAT-lncRNA	VI	NC_025996.1	40424233	40428700	+	LOC105043557	antisense-overlapped within 2k downstream region	not overlapped	NC_025996.1	40428797	40431109	-	XP_019705390.1	PREDICTED: replication factor C subunit 2-like [Elaeis guineensis]
MSTRG.13309	NAT-lncRNA	VI	NC_025996.1	47950346	47953285	-	LOC105043822	antisense-overlapped within 2k downstream region	not overlapped	NC_025996.1	47938791	47949854	+	XP_010919841.1	PREDICTED: dynamin-related protein 1E-like [Elaeis guineensis]
MSTRG.13625	NAT-lncRNA	V	NC_025996.1	52409651	52416623	+	LOC105044080	antisense-overlapped within 2k promoter region	not overlapped	NC_025996.1	52405389	52408334	-	XP_019705398.1	PREDICTED: ferredoxin--NADP reductase, leaf isozyme, chloroplastic [Elaeis guineensis]
MSTRG.13684	NAT-lncRNA	V	NC_025996.1	53263533	53268867	+	LOC105044138	antisense-overlapped within 2k promoter region	not overlapped	NC_025996.1	53255703	53262276	-	XP_010920237.1	PREDICTED: peptidyl-prolyl cis-trans isomerase Pin1-like [Elaeis guineensis]
MSTRG.13766	NAT-lncRNA	VI	NC_025996.1	54467041	54479801	-	LOC105044253	antisense-overlapped within 2k downstream region	not overlapped	NC_025996.1	54463827	54466272	+	pseudogene	probable leucine-rich repeat receptor-like protein kinase At1g35710
MSTRG.14178	NAT-lncRNA	VI	NC_025997.1	2664698	2666537	+	LOC105044497	antisense-overlapped within 2k downstream region	not overlapped	NC_025997.1	2666543	2669604	-	XP_010920725.1	PREDICTED: actin-101 [Elaeis guineensis]
MSTRG.14643	NAT-lncRNA	VI	NC_025997.1	8867488	8868180	-	LOC105044884	antisense-overlapped within 2k downstream region	not overlapped	NC_025997.1	8853002	8867486	+	XP_010921250.1	PREDICTED: uncharacterized protein LOC105044884 isoform X1 [Elaeis guineensis]
MSTRG.14862	NAT-lncRNA	VI	NC_025997.1	12373816	12374229	+	LOC105045033	antisense-overlapped within 2k downstream region	not overlapped	NC_025997.1	12375547	12376496	-	XP_010921496.1	PREDICTED: uncharacterized protein LOC105045033 [Elaeis guineensis]
MSTRG.15044	NAT-lncRNA	VI	NC_025997.1	17806401	17809342	-	LOC105045199	antisense-overlapped within 2k downstream region	not overlapped	NC_025997.1	17775692	17805573	+	XP_010921680.1	PREDICTED: beta-glucosidase 11-like [Elaeis guineensis]
MSTRG.15044	NAT-lncRNA	V	NC_025997.1	17806401	17809342	-	LOC105045203	antisense-overlapped within 2k promoter region	not overlapped	NC_025997.1	17811028	17884149	+	XP_019706265.1	PREDICTED: beta-glucosidase 22-like isoform X2 [Elaeis guineensis]
MSTRG.15276	NAT-lncRNA	VI	NC_025997.1	24947641	24950570	-	LOC105045315	antisense-overlapped within 2k downstream region	not overlapped	NC_025997.1	24945061	24947260	+	XP_010921855.1	PREDICTED: pentatricopeptide repeat-containing protein At1g08070, chloroplastic-like [Elaeis guineensis]
MSTRG.15551	NAT-lncRNA	VI	NC_025997.1	33131784	33132304	-	LOC105045458	antisense-overlapped within 2k downstream region	not overlapped	NC_025997.1	33121680	33131437	+	XP_010922041.1	PREDICTED: uncharacterized protein LOC105045458 [Elaeis guineensis]
MSTRG.15551	NAT-lncRNA	V	NC_025997.1	33131784	33132304	-	LOC105045461	antisense-overlapped within 2k promoter region	not overlapped	NC_025997.1	33133873	33197181	+	XP_010922050.1	PREDICTED: proteasome-associated protein ECM29 homolog isoform X4 [Elaeis guineensis]
MSTRG.15801	NAT-lncRNA	VI	NC_025997.1	39243878	39264522	-	LOC105046145	antisense-overlapped within 2k downstream region	not overlapped	NC_025997.1	39235624	39243842	+	XP_010922971.1	PREDICTED: transcription factor GAMYB isoform X2 [Elaeis guineensis]
MSTRG.16002	NAT-lncRNA	VI	NC_025997.1	42182089	42187133	-	LOC105046019	antisense-overlapped within 2k downstream region	not overlapped	NC_025997.1	42167498	42180463	+	XP_010922799.1	PREDICTED: B3 domain-containing protein Os05g0481400 isoform X1 [Elaeis guineensis]
MSTRG.16344	NAT-lncRNA	VI	NC_025997.1	46792855	46835887	+	LOC105046163	antisense-overlapped within 2k downstream region	not overlapped	NC_025997.1	46836777	46841428	-	pseudogene	uncharacterized LOC105046163
MSTRG.16350	NAT-lncRNA	VI	NC_025997.1	46859395	46865071	-	LOC105045799	antisense-overlapped within 2k downstream region	not overlapped	NC_025997.1	46849402	46859384	+	XP_010922503.1	PREDICTED: probable sugar phosphate/phosphate translocator At3g11320 [Elaeis guineensis]
MSTRG.16541	NAT-lncRNA	V	NC_025997.1	48771909	48772297	+	LOC105045653	antisense-overlapped within 2k promoter region	not overlapped	NC_025997.1	48739263	48771052	-	XP_019705926.1	PREDICTED: uncharacterized protein LOC105045653 [Elaeis guineensis]
MSTRG.16541	NAT-lncRNA	VI	NC_025997.1	48771909	48772297	+	LOC105045651	antisense-overlapped within 2k downstream region	not overlapped	NC_025997.1	48772415	48783798	-	XP_010922307.1	PREDICTED: ribonuclease II, chloroplastic/mitochondrial [Elaeis guineensis]
MSTRG.17400	NAT-lncRNA	VI	NC_025998.1	14402911	14414184	-	LOC105046801	antisense-overlapped within 2k downstream region	not overlapped	NC_025998.1	14360089	14402827	+	XP_010923827.1	PREDICTED: probable cyclic nucleotide-gated ion channel 5 [Elaeis guineensis]
MSTRG.17988	NAT-lncRNA	V	NC_025998.1	30426906	30427858	+	LOC105047102	antisense-overlapped within 2k promoter region	not overlapped	NC_025998.1	30417287	30425563	-	XP_010924210.1	PREDICTED: probable ubiquitin-conjugating enzyme E2 37 isoform X2 [Elaeis guineensis]
MSTRG.18286	NAT-lncRNA	VI	NC_025998.1	36034470	36036410	+	LOC105047326	antisense-overlapped within 2k downstream region	not overlapped	NC_025998.1	36036491	36054885	-	XP_010924511.1	PREDICTED: dynamin-related protein 5A-like isoform X2 [Elaeis guineensis]
MSTRG.18545	NAT-lncRNA	VI	NC_025998.1	40108963	40109495	+	LOC105047547	antisense-overlapped within 2k downstream region	not overlapped	NC_025998.1	40109567	40113825	-	XP_010924813.1	PREDICTED: myosin IC heavy chain isoform X2 [Elaeis guineensis]
MSTRG.18979	NAT-lncRNA	VI	NC_025999.1	1479564	1480885	+	LOC105047875	antisense-overlapped within 2k downstream region	not overlapped	NC_025999.1	1481070	1488062	-	XP_010925293.1	PREDICTED: protein FAR1-RELATED SEQUENCE 6 [Elaeis guineensis]
MSTRG.19769	NAT-lncRNA	VI	NC_025999.1	12017360	12018339	-	LOC105048496	antisense-overlapped within 2k downstream region	not overlapped	NC_025999.1	12006696	12016446	+	XP_010926115.1	PREDICTED: ubiquitin-conjugating enzyme E2 variant 1D [Elaeis guineensis]
MSTRG.20128	NAT-lncRNA	VI	NC_025999.1	17570662	17573266	+	LOC105048642	antisense-overlapped within 2k downstream region	not overlapped	NC_025999.1	17575226	17577171	-	XP_010926330.1	PREDICTED: WEB family protein At4g27595, chloroplastic-like [Elaeis guineensis]
MSTRG.20275	NAT-lncRNA	VI	NC_025999.1	20307559	20308134	-	LOC105048820	antisense-overlapped within 2k downstream region	not overlapped	NC_025999.1	20303528	20307326	+	XP_010926579.1	PREDICTED: 29 kDa ribonucleoprotein A, chloroplastic [Elaeis guineensis]
MSTRG.20302	NAT-lncRNA	VI	NC_025999.1	21061603	21062698	+	LOC105048842	antisense-overlapped within 2k downstream region	not overlapped	NC_025999.1	21063397	21076114	-	XP_010926617.1	PREDICTED: basic leucine zipper and W2 domain-containing protein 2 [Elaeis guineensis]
MSTRG.20449	NAT-lncRNA	VI	NC_025999.1	26117526	26118864	-	LOC105049008	antisense-overlapped within 2k downstream region	not overlapped	NC_025999.1	26107037	26115685	+	XP_010926845.1	PREDICTED: uncharacterized protein LOC105049008 isoform X1 [Elaeis guineensis]
MSTRG.20862	NAT-lncRNA	VI	NC_025999.1	38742062	38743629	-	LOC105049180	antisense-overlapped within 2k downstream region	not overlapped	NC_025999.1	38733521	38742055	+	XP_019707460.1	PREDICTED: probable protein phosphatase 2C 59 [Elaeis guineensis]
MSTRG.21178	NAT-lncRNA	VI	NC_026000.1	1227418	1228558	-	LOC105049432	antisense-overlapped within 2k downstream region	not overlapped	NC_026000.1	1219878	1226593	+	XP_010927368.2	PREDICTED: CCR4-NOT transcription complex subunit 10-like, partial [Elaeis guineensis]
MSTRG.21376	NAT-lncRNA	VI	NC_026000.1	4870764	4878642	+	LOC105049564	antisense-overlapped within 2k downstream region	not overlapped	NC_026000.1	4878681	4899838	-	XP_010927559.1	PREDICTED: lysine-specific demethylase REF6-like [Elaeis guineensis]
MSTRG.21552	NAT-lncRNA	VI	NC_026000.1	8268630	8296233	+	LOC105049669	antisense-overlapped within 2k downstream region	not overlapped	NC_026000.1	8296318	8302578	-	XP_019707959.1	PREDICTED: auxin efflux carrier component 5-like isoform X1 [Elaeis guineensis]
MSTRG.21756	NAT-lncRNA	VI	NC_026000.1	15824919	15837772	-	LOC105049796	antisense-overlapped within 2k downstream region	not overlapped	NC_026000.1	15822830	15824520	+	pseudogene	uncharacterized LOC105049796
MSTRG.21847	NAT-lncRNA	V	NC_026000.1	17994326	17995125	-	LOC105049856	antisense-overlapped within 2k promoter region	not overlapped	NC_026000.1	17996867	18004391	+	XP_019707735.1	PREDICTED: sister chromatid cohesion 1 protein 3-like [Elaeis guineensis]
MSTRG.21939	NAT-lncRNA	VI	NC_026000.1	20448890	20449230	-	LOC105049921	antisense-overlapped within 2k downstream region	not overlapped	NC_026000.1	20447898	20448611	+	XP_010928021.1	PREDICTED: copper transporter 1-like [Elaeis guineensis]
MSTRG.21976	NAT-lncRNA	VI	NC_026000.1	21422290	21423007	-	LOC105049945	antisense-overlapped within 2k downstream region	not overlapped	NC_026000.1	21414343	21421687	+	XP_010928057.1	PREDICTED: uncharacterized protein LOC105049945 [Elaeis guineensis]
MSTRG.22449	NAT-lncRNA	VI	NC_026000.1	29090852	29093526	-	LOC105050290	antisense-overlapped within 2k downstream region	not overlapped	NC_026000.1	29082831	29090753	+	XP_010928552.1	PREDICTED: IAA-amino acid hydrolase ILR1-like 1 [Elaeis guineensis]
MSTRG.22518	NAT-lncRNA	V	NC_026000.1	30159369	30168027	-	LOC105050340	antisense-overlapped within 2k promoter region	not overlapped	NC_026000.1	30169051	30172762	+	XP_010928615.1	PREDICTED: trihelix transcription factor ASIL1-like [Elaeis guineensis]
MSTRG.22620	NAT-lncRNA	VI	NC_026000.1	31336222	31357900	+	LOC105050400	antisense-overlapped within 2k downstream region	not overlapped	NC_026000.1	31357935	31396554	-	XP_010928700.1	PREDICTED: calcium-transporting ATPase 8, plasma membrane-type-like [Elaeis guineensis]
MSTRG.22961	NAT-lncRNA	VI	NC_026000.1	35988193	35989684	+	LOC105050692	antisense-overlapped within 2k downstream region	not overlapped	NC_026000.1	35989694	35998197	-	XP_010929108.1	PREDICTED: homeobox protein knotted-1-like 13 [Elaeis guineensis]
MSTRG.23019	NAT-lncRNA	VI	NC_026000.1	36715776	36727059	-	LOC105050732	antisense-overlapped within 2k downstream region	not overlapped	NC_026000.1	36706800	36715302	+	XP_010929163.1	PREDICTED: leucine aminopeptidase 1 [Elaeis guineensis]
MSTRG.23329	NAT-lncRNA	VI	NC_026001.1	380617	398682	-	LOC105050969	antisense-overlapped within 2k downstream region	not overlapped	NC_026001.1	377031	378875	+	XP_010929504.1	PREDICTED: uncharacterized protein LOC105050969 [Elaeis guineensis]
MSTRG.23513	NAT-lncRNA	VI	NC_026001.1	4110534	4111288	+	LOC105051029	antisense-overlapped within 2k downstream region	not overlapped	NC_026001.1	4111772	4125367	-	XP_010929592.1	PREDICTED: RNA pseudouridine synthase 7 isoform X1 [Elaeis guineensis]
MSTRG.23859	NAT-lncRNA	V	NC_026001.1	16987363	16990395	+	LOC105051275	antisense-overlapped within 2k promoter region	not overlapped	NC_026001.1	16977486	16987194	-	XP_010929919.1	PREDICTED: quinolinate synthase, chloroplastic [Elaeis guineensis]
MSTRG.24267	NAT-lncRNA	VI	NC_026001.1	27165483	27170051	+	LOC105051532	antisense-overlapped within 2k downstream region	not overlapped	NC_026001.1	27170181	27183825	-	XP_010930324.1	PREDICTED: ankyrin repeat protein SKIP35 [Elaeis guineensis]
MSTRG.24390	NAT-lncRNA	VI	NC_026001.1	29279838	29280296	+	LOC105051913	antisense-overlapped within 2k downstream region	not overlapped	NC_026001.1	29280492	29282337	-	XP_010930859.2	PREDICTED: uncharacterized protein LOC105051913 [Elaeis guineensis]
MSTRG.24651	NAT-lncRNA	VI	NC_026001.1	32665217	32665710	-	LOC105051681	antisense-overlapped within 2k downstream region	not overlapped	NC_026001.1	32660261	32665173	+	XP_010930523.1	PREDICTED: LOW QUALITY PROTEIN: uncharacterized protein LOC105051681 [Elaeis guineensis]
MSTRG.24924	NAT-lncRNA	V	NC_026001.1	37070464	37071258	+	LOC105052099	antisense-overlapped within 2k promoter region	not overlapped	NC_026001.1	37065746	37070213	-	XP_010931106.1	PREDICTED: geranylgeranyl transferase type-2 subunit beta 1 isoform X2 [Elaeis guineensis]
MSTRG.24924	NAT-lncRNA	VI	NC_026001.1	37070464	37071258	+	LOC105052097	antisense-overlapped within 2k downstream region	not overlapped	NC_026001.1	37071414	37087530	-	XP_010931103.1	PREDICTED: nicalin [Elaeis guineensis]
MSTRG.25721	NAT-lncRNA	V	NC_026002.1	16031152	16031676	+	LOC105052611	antisense-overlapped within 2k promoter region	not overlapped	NC_026002.1	16023241	16029451	-	XP_010931772.1	PREDICTED: probable pre-mRNA-splicing factor ATP-dependent RNA helicase DEAH2 isoform X2 [Elaeis guineensis]
MSTRG.26099	NAT-lncRNA	VI	NC_026002.1	20547883	20548230	-	LOC105052909	antisense-overlapped within 2k downstream region	not overlapped	NC_026002.1	20539571	20547864	+	XP_010932195.1	PREDICTED: peroxisomal nicotinamide adenine dinucleotide carrier isoform X1 [Elaeis guineensis]
MSTRG.27472	NAT-lncRNA	VI	NC_026003.1	17871264	17873989	-	LOC105054184	antisense-overlapped within 2k downstream region	not overlapped	NC_026003.1	17862412	17871252	+	XP_010933934.1	PREDICTED: barley B recombinant-like protein D [Elaeis guineensis]
MSTRG.27472	NAT-lncRNA	V	NC_026003.1	17871264	17873989	-	LOC105054367	antisense-overlapped within 2k promoter region	not overlapped	NC_026003.1	17875672	17876924	+	pseudogene	ribosome production factor 2 homolog
MSTRG.27906	NAT-lncRNA	V	NC_026003.1	24094122	24098581	+	LOC105054324	antisense-overlapped within 2k promoter region	not overlapped	NC_026003.1	24089309	24092964	-	XP_010934122.1	PREDICTED: pentatricopeptide repeat-containing protein At1g62590-like [Elaeis guineensis]
MSTRG.28241	NAT-lncRNA	VI	NC_026003.1	28469275	28471122	-	LOC105054482	antisense-overlapped within 2k downstream region	not overlapped	NC_026003.1	28460046	28469248	+	XP_010934310.1	PREDICTED: glycolipid transfer protein 1 [Elaeis guineensis]
MSTRG.28241	NAT-lncRNA	V	NC_026003.1	28469275	28471122	-	LOC105054483	antisense-overlapped within 2k promoter region	not overlapped	NC_026003.1	28471913	28474779	+	XP_010934311.1	PREDICTED: CRIB domain-containing protein RIC7 [Elaeis guineensis]
MSTRG.28862	NAT-lncRNA	VI	NC_026004.1	13716079	13717868	+	LOC105054909	antisense-overlapped within 2k downstream region	not overlapped	NC_026004.1	13718984	13730082	-	XP_010934852.1	PREDICTED: methionine adenosyltransferase 2 subunit beta [Elaeis guineensis]
MSTRG.28993	NAT-lncRNA	VI	NC_026004.1	15673018	15683439	-	LOC105054924	antisense-overlapped within 2k downstream region	not overlapped	NC_026004.1	15666456	15672986	+	XP_010934872.1	PREDICTED: UMP-CMP kinase 3 isoform X1 [Elaeis guineensis]
MSTRG.29003	NAT-lncRNA	VI	NC_026004.1	15746315	15746777	-	LOC105054919	antisense-overlapped within 2k downstream region	not overlapped	NC_026004.1	15742494	15746313	+	XP_010934866.1	PREDICTED: peroxidase 20 [Elaeis guineensis]
MSTRG.29413	NAT-lncRNA	VI	NC_026004.1	21582892	21587900	+	LOC105055282	antisense-overlapped within 2k downstream region	not overlapped	NC_026004.1	21589376	21592651	-	XP_010935361.1	PREDICTED: uncharacterized protein LOC105055282 [Elaeis guineensis]
MSTRG.29443	NAT-lncRNA	VI	NC_026004.1	22083527	22084620	+	LOC105055363	antisense-overlapped within 2k downstream region	not overlapped	NC_026004.1	22084650	22103813	-	XP_010935427.1	PREDICTED: auxin response factor 12-like [Elaeis guineensis]
MSTRG.29594	NAT-lncRNA	V	NC_026004.1	23585072	23585397	+	LOC105055539	antisense-overlapped within 2k promoter region	not overlapped	NC_026004.1	23580550	23584857	-	pseudogene	uncharacterized LOC105055539
MSTRG.29653	NAT-lncRNA	VI	NC_026004.1	24179757	24183119	-	LOC109506462	antisense-overlapped within 2k downstream region	not overlapped	NC_026004.1	24176756	24179668	+	pseudogene	U-box domain-containing protein 33-like
MSTRG.29869	NAT-lncRNA	VI	NC_026004.1	26751998	26752936	+	LOC105055773	antisense-overlapped within 2k downstream region	not overlapped	NC_026004.1	26753677	26770524	-	XP_019709685.1	PREDICTED: uncharacterized protein LOC105055773 [Elaeis guineensis]
MSTRG.29910	NAT-lncRNA	VI	NC_026004.1	27172958	27173548	+	LOC105055742	antisense-overlapped within 2k downstream region	not overlapped	NC_026004.1	27174725	27178924	-	XP_010936007.1	PREDICTED: cyclin-dependent kinase inhibitor 5 [Elaeis guineensis]
MSTRG.30111	NAT-lncRNA	V	NC_026005.1	1563336	1563993	+	LOC105055885	antisense-overlapped within 2k promoter region	not overlapped	NC_026005.1	1553533	1563105	-	XP_010936198.1	PREDICTED: uncharacterized protein LOC105055885 [Elaeis guineensis]
MSTRG.30160	NAT-lncRNA	VI	NC_026005.1	2681245	2683492	+	LOC105055919	antisense-overlapped within 2k downstream region	not overlapped	NC_026005.1	2683551	2690993	-	XP_019709944.1	PREDICTED: lariat debranching enzyme isoform X2 [Elaeis guineensis]
MSTRG.30272	NAT-lncRNA	V	NC_026005.1	4242857	4245051	+	LOC105056008	antisense-overlapped within 2k promoter region	not overlapped	NC_026005.1	4240425	4242404	-	XP_010936370.2	PREDICTED: pentatricopeptide repeat-containing protein At3g62890-like [Elaeis guineensis]
MSTRG.30272	NAT-lncRNA	VI	NC_026005.1	4242857	4245051	+	LOC105056010	antisense-overlapped within 2k downstream region	not overlapped	NC_026005.1	4245070	4252102	-	XP_010936371.1	PREDICTED: uncharacterized protein LOC105056010 [Elaeis guineensis]
MSTRG.30600	NAT-lncRNA	V	NC_026005.1	12557270	12561314	-	LOC105056225	antisense-overlapped within 2k promoter region	not overlapped	NC_026005.1	12561323	12570154	+	XP_010936648.1	PREDICTED: uncharacterized protein LOC105056225 [Elaeis guineensis]
MSTRG.30784	NAT-lncRNA	V	NC_026005.1	16942673	16944530	-	LOC105056337	antisense-overlapped within 2k promoter region	not overlapped	NC_026005.1	16944609	16947118	+	XP_010936801.1	PREDICTED: 54S ribosomal protein L51, mitochondrial [Elaeis guineensis]
MSTRG.30788	NAT-lncRNA	V	NC_026005.1	16963491	16972062	-	LOC105056359	antisense-overlapped within 2k promoter region	not overlapped	NC_026005.1	16972680	16973351	+	XP_010936828.1	PREDICTED: uncharacterized protein LOC105056359 [Elaeis guineensis]
MSTRG.30878	NAT-lncRNA	VI	NC_026005.1	18785833	18790068	+	LOC109506528	antisense-overlapped within 2k downstream region	not overlapped	NC_026005.1	18790107	18791347	-	XP_019709993.1	PREDICTED: rust resistance kinase Lr10-like [Elaeis guineensis]
MSTRG.31291	NAT-lncRNA	VI	NC_026005.1	24325094	24338082	+	LOC105056681	antisense-overlapped within 2k downstream region	not overlapped	NC_026005.1	24339966	24344979	-	misc_RNA	uncharacterized LOC105056681
MSTRG.32111	NAT-lncRNA	VI	NC_026006.1	6436223	6437601	-	LOC105057317	antisense-overlapped within 2k downstream region	not overlapped	NC_026006.1	6425268	6435195	+	XP_019710189.1	PREDICTED: protein REDUCED WALL ACETYLATION 1 isoform X1 [Elaeis guineensis]
MSTRG.32229	NAT-lncRNA	VI	NC_026006.1	7957898	7959144	-	LOC105057490	antisense-overlapped within 2k downstream region	not overlapped	NC_026006.1	7957091	7957873	+	XP_010938417.1	PREDICTED: protein RALF-like 33 [Elaeis guineensis]
MSTRG.32418	NAT-lncRNA	VI	NC_026006.1	11104899	11105726	-	LOC105057693	antisense-overlapped within 2k downstream region	not overlapped	NC_026006.1	11079462	11104888	+	XP_019710462.1	PREDICTED: RNA-binding protein BRN1-like [Elaeis guineensis]
MSTRG.32843	NAT-lncRNA	VI	NC_026006.1	21569800	21592236	-	LOC105057842	antisense-overlapped within 2k downstream region	not overlapped	NC_026006.1	21558779	21569759	+	XP_010938849.1	PREDICTED: uncharacterized protein LOC105057842 [Elaeis guineensis]
MSTRG.33179	NAT-lncRNA	VI	NC_026007.1	8139159	8139849	-	LOC105058048	antisense-overlapped within 2k downstream region	not overlapped	NC_026007.1	8131030	8138196	+	XP_010939128.1	PREDICTED: histone deacetylase 6 [Elaeis guineensis]
MSTRG.33228	NAT-lncRNA	V	NC_026007.1	9344283	9347536	-	LOC105058065	antisense-overlapped within 2k promoter region	not overlapped	NC_026007.1	9347825	9354518	+	XP_010939145.1	PREDICTED: uncharacterized protein LOC105058065 isoform X1 [Elaeis guineensis]
MSTRG.33984	NAT-lncRNA	VI	NC_026007.1	20355655	20356675	+	LOC105058606	antisense-overlapped within 2k downstream region	not overlapped	NC_026007.1	20356687	20365407	-	XP_010939882.1	PREDICTED: oligouridylate-binding protein 1B isoform X2 [Elaeis guineensis]
MSTRG.34112	NAT-lncRNA	VI	NC_026007.1	22085055	22085765	-	TRNAN-GUU	antisense-overlapped within 2k downstream region	not overlapped	NC_026007.1	22083788	22083861	+	tRNA
MSTRG.34288	NAT-lncRNA	VI	NC_026007.1	23987014	23987432	-	LOC105058811	antisense-overlapped within 2k downstream region	not overlapped	NC_026007.1	23980900	23985847	+	XP_010940165.1	PREDICTED: glutaredoxin [Elaeis guineensis]
MSTRG.34562	NAT-lncRNA	VI	NC_026008.1	3177276	3177828	-	LOC105059010	antisense-overlapped within 2k downstream region	not overlapped	NC_026008.1	3172647	3177215	+	XP_010940434.1	PREDICTED: uncharacterized protein LOC105059010 [Elaeis guineensis]
MSTRG.34710	NAT-lncRNA	VI	NC_026008.1	4767313	4769503	-	LOC105058898	antisense-overlapped within 2k downstream region	not overlapped	NC_026008.1	4762543	4767282	+	XP_010940267.1	PREDICTED: protein indeterminate-domain 5, chloroplastic-like [Elaeis guineensis]
MSTRG.34719	NAT-lncRNA	VI	NC_026008.1	4891099	4894619	-	LOC105058894	antisense-overlapped within 2k downstream region	not overlapped	NC_026008.1	4884484	4889124	+	XP_010940259.1	PREDICTED: phytoene synthase 2, chloroplastic [Elaeis guineensis]
MSTRG.35028	NAT-lncRNA	VI	NC_026008.1	12397652	12400453	+	LOC105059389	antisense-overlapped within 2k downstream region	not overlapped	NC_026008.1	12400572	12444081	-	pseudogene	uncharacterized LOC105059389
MSTRG.35307	NAT-lncRNA	VI	NC_026008.1	17813357	17816153	-	LOC105059531	antisense-overlapped within 2k downstream region	not overlapped	NC_026008.1	17791483	17811914	+	XP_019711055.1	PREDICTED: uncharacterized protein LOC105059531 [Elaeis guineensis]
MSTRG.35835	NAT-lncRNA	VI	NW_011550905.1	4060340	4061040	+	LOC105059881	antisense-overlapped within 2k downstream region	not overlapped	NW_011550905.1	4061426	4088302	-	XP_010941677.1	PREDICTED: nuclear transcription factor Y subunit C-4-like [Elaeis guineensis]
MSTRG.37565	NAT-lncRNA	VI	NW_011550917.1	363307	369464	-	LOC105060994	antisense-overlapped within 2k downstream region	not overlapped	NW_011550917.1	342651	363302	+	XP_010943203.1	PREDICTED: protein TIC 21, chloroplastic isoform X1 [Elaeis guineensis]
MSTRG.38976	NAT-lncRNA	VI	NW_011550942.1	825395	829873	-	LOC105032085	antisense-overlapped within 2k downstream region	not overlapped	NW_011550942.1	822452	824521	+	XP_010904739.1	PREDICTED: protein YLS9-like [Elaeis guineensis]
MSTRG.40308	NAT-lncRNA	VI	NW_011550975.1	608342	612988	-	LOC105032767	antisense-overlapped within 2k downstream region	not overlapped	NW_011550975.1	603485	606449	+	XP_010905628.2	PREDICTED: type IV inositol polyphosphate 5-phosphatase 9-like [Elaeis guineensis]
MSTRG.40838	NAT-lncRNA	VI	NW_011550992.1	635042	637070	+	LOC105033035	antisense-overlapped within 2k downstream region	not overlapped	NW_011550992.1	637204	641592	-	pseudogene	pentatricopeptide repeat-containing protein At4g39620, chloroplastic-like
MSTRG.41421	NAT-lncRNA	V	NW_011551017.1	376438	381179	+	LOC105033323	antisense-overlapped within 2k promoter region	not overlapped	NW_011551017.1	363150	376178	-	XP_019702170.1	PREDICTED: double-strand break repair protein MRE11-like isoform X2 [Elaeis guineensis]
MSTRG.41729	NAT-lncRNA	V	NW_011551030.1	59962	67028	+	LOC105033462	antisense-overlapped within 2k promoter region	not overlapped	NW_011551030.1	55532	59814	-	XP_010906592.1	PREDICTED: uncharacterized protein LOC105033462 [Elaeis guineensis]
MSTRG.41729	NAT-lncRNA	VI	NW_011551030.1	59962	67028	+	LOC105033463	antisense-overlapped within 2k downstream region	not overlapped	NW_011551030.1	67136	91598	-	pseudogene	uncharacterized LOC105033463
MSTRG.41771	NAT-lncRNA	VI	NW_011551031.1	677540	681557	+	LOC105033495	antisense-overlapped within 2k downstream region	not overlapped	NW_011551031.1	683032	683719	-	XP_010906626.1	PREDICTED: protein RESPONSE TO LOW SULFUR 3-like [Elaeis guineensis]
MSTRG.43342	NAT-lncRNA	V	NW_011551132.1	100083	100955	+	TRNAT-UGU	antisense-overlapped within 2k promoter region	not overlapped	NW_011551132.1	98051	98122	-	tRNA
MSTRG.43699	NAT-lncRNA	VI	NW_011551161.1	334704	336647	-	LOC105034341	antisense-overlapped within 2k downstream region	not overlapped	NW_011551161.1	326632	334015	+	XP_010907769.1	PREDICTED: nucleoside diphosphate kinase 2, chloroplastic [Elaeis guineensis]
MSTRG.44274	NAT-lncRNA	VI	NW_011551222.1	227873	247460	+	LOC105034540	antisense-overlapped within 2k downstream region	not overlapped	NW_011551222.1	247464	347285	-	XP_010908049.1	PREDICTED: SNARE-interacting protein KEULE-like isoform X3 [Elaeis guineensis]
MSTRG.46625	NAT-lncRNA	VI	NW_011551677.1	94952	103494	-	LOC105035322	antisense-overlapped within 2k downstream region	not overlapped	NW_011551677.1	89937	94036	+	XP_019702854.1	PREDICTED: calmodulin-binding receptor-like cytoplasmic kinase 2 [Elaeis guineensis]
MSTRG.50266	NAT-lncRNA	VI	NW_011554163.1	32590	33671	+	LOC105036243	antisense-overlapped within 2k downstream region	not overlapped	NW_011554163.1	34021	37054	-	XP_019703137.1	PREDICTED: LRR receptor-like serine/threonine-protein kinase ERL1, partial [Elaeis guineensis]
MSTRG.53636	NAT-lncRNA	VI	NW_011566565.1	2289	2720	-	LOC105037187	antisense-overlapped within 2k downstream region	not overlapped	NW_011566565.1	89	932	+	XP_010911180.2	PREDICTED: probable serine/threonine-protein kinase drkC [Elaeis guineensis]
MSTRG.54180	NAT-lncRNA	V	NW_011569536.1	1086	2111	+	LOC105037328	antisense-overlapped within 2k promoter region	not overlapped	NW_011569536.1	157	781	-	XP_010911309.1	PREDICTED: acyl transferase 5-like [Elaeis guineensis]
MSTRG.100	Intronic-lncRNA		NC_025993.1	605934	608954	+	LOC105047461	Sense-overlapped	not overlapped	NC_025993.1	590008	633393	+	pseudogene	uncharacterized LOC105047461
MSTRG.479	Sense-lncRNA		NC_025993.1	4961988	4962917	+	LOC105032387	Sense-overlapped	Sense-overlapped	NC_025993.1	4949358	4962829	+	XP_010905167.1	PREDICTED: SWR1-complex protein 4 [Elaeis guineensis]
MSTRG.746	Sense-lncRNA		NC_025993.1	8934826	8938370	-	LOC109505864	Sense-overlapped	Sense-overlapped	NC_025993.1	8933578	8941959	-	pseudogene
MSTRG.879	lincRNA		NC_025993.1	10670848	10671096	+	LOC105041412	Sense-overlapped	not overlapped	NC_025993.1	10661380	10670144	+	XP_010916687.1	PREDICTED: ER lumen protein-retaining receptor A-like [Elaeis guineensis]
MSTRG.2939	Sense-lncRNA		NC_025993.1	38786138	38792293	-	LOC105056593	Sense-overlapped	Sense-overlapped	NC_025993.1	38788567	38792293	-	XP_010937152.1	PREDICTED: G-type lectin S-receptor-like serine/threonine-protein kinase SD3-1 [Elaeis guineensis]
MSTRG.3376	Intronic-lncRNA		NC_025993.1	47013442	47014505	+	LOC105058435	Sense-overlapped	not overlapped	NC_025993.1	47009151	47019621	+	XP_010939679.1	PREDICTED: metal transporter Nramp6-like [Elaeis guineensis]
MSTRG.3731	Sense-lncRNA		NC_025993.1	55763002	55802231	+	LOC105061310	Sense-overlapped	Sense-overlapped	NC_025993.1	55759230	55790349	+	ncRNA	lncRNA
MSTRG.3731	Sense-lncRNA		NC_025993.1	55763002	55802231	+	LOC105061327	Sense-overlapped	Sense-overlapped	NC_025993.1	55795026	55808439	+	XP_010943641.1	PREDICTED: heterogeneous nuclear ribonucleoprotein 1 [Elaeis guineensis]
MSTRG.3849	Intronic-lncRNA		NC_025993.1	59166115	59167071	+	LOC105060761	Sense-overlapped	not overlapped	NC_025993.1	59159488	59169181	+	XP_010942913.1	PREDICTED: uncharacterized protein At1g01500 [Elaeis guineensis]
MSTRG.4141	Intronic-lncRNA		NC_025993.1	65030985	65033492	-	LOC105033518	Sense-overlapped	not overlapped	NC_025993.1	65025858	65038342	-	XP_010906679.1	PREDICTED: septin and tuftelin-interacting protein 1 homolog 1 [Elaeis guineensis]
MSTRG.4500	Intronic-lncRNA		NC_025994.1	4020114	4020548	+	LOC105036523	Sense-overlapped	not overlapped	NC_025994.1	3905888	4023136	+	XP_010910589.1	PREDICTED: LOW QUALITY PROTEIN: DNA (cytosine-5)-methyltransferase 1B-like [Elaeis guineensis]
MSTRG.4501	Sense-lncRNA		NC_025994.1	4021085	4023611	+	LOC105036523	Sense-overlapped	Sense-overlapped	NC_025994.1	3905888	4023136	+	XP_010910589.1	PREDICTED: LOW QUALITY PROTEIN: DNA (cytosine-5)-methyltransferase 1B-like [Elaeis guineensis]
MSTRG.5348	Sense-lncRNA		NC_025994.1	22883208	22885128	-	LOC105038302	Sense-overlapped	Sense-overlapped	NC_025994.1	22884522	22885128	-	XP_019703676.1	PREDICTED: uncharacterized protein LOC105038302 [Elaeis guineensis]
MSTRG.6830	Intronic-lncRNA		NC_025994.1	48107984	48108320	-	LOC105039313	Sense-overlapped	not overlapped	NC_025994.1	48106570	48125372	-	XP_010913726.1	PREDICTED: mannosyl-oligosaccharide 1,2-alpha-mannosidase MNS1-like isoform X1 [Elaeis guineensis]
MSTRG.7938	Sense-lncRNA		NC_025994.1	65409820	65424830	-	LOC105040154	Sense-overlapped	Sense-overlapped	NC_025994.1	65397693	65421329	-	XP_010914858.1	PREDICTED: uncharacterized protein LOC105040154 [Elaeis guineensis]
MSTRG.8840	Intronic-lncRNA		NC_025995.1	12553493	12554554	-	LOC105040771	Sense-overlapped	not overlapped	NC_025995.1	12545542	12555356	-	XP_010915759.1	PREDICTED: S-type anion channel SLAH3-like isoform X3 [Elaeis guineensis]
MSTRG.10436	Sense-lncRNA		NC_025995.1	38300012	38301737	-	LOC105042012	Sense-overlapped	Sense-overlapped	NC_025995.1	38301684	38309913	-	pseudogene
MSTRG.10598	Sense-lncRNA		NC_025995.1	42721991	42724499	+	LOC105042126	Sense-overlapped	Sense-overlapped	NC_025995.1	42712839	42724499	+	XP_019704821.1	PREDICTED: branchpoint-bridging protein-like [Elaeis guineensis]
MSTRG.11809	Sense-lncRNA		NC_025996.1	18484442	18500414	-	LOC105042765	Sense-overlapped	Sense-overlapped	NC_025996.1	18484442	18514689	-	XP_010918385.1	PREDICTED: uncharacterized protein LOC105042765 isoform X1 [Elaeis guineensis]
MSTRG.12242	Sense-lncRNA		NC_025996.1	31620116	31625621	+	LOC109505769	Sense-overlapped	Sense-overlapped	NC_025996.1	31620066	31628575	+	XP_019705557.1	PREDICTED: uncharacterized protein LOC109505769 [Elaeis guineensis]
MSTRG.12750	Sense-lncRNA		NC_025996.1	39900764	39903770	-	LOC105043399	Sense-overlapped	Sense-overlapped	NC_025996.1	39900635	39915834	-	XP_019705459.1	PREDICTED: uncharacterized protein LOC105043399 [Elaeis guineensis]
MSTRG.13113	Intronic-lncRNA		NC_025996.1	45308556	45313181	+	LOC105043686	Sense-overlapped	not overlapped	NC_025996.1	45299463	45318381	+	XP_010919647.1	PREDICTED: 8-amino-7-oxononanoate synthase isoform X1 [Elaeis guineensis]
MSTRG.13879	Sense-lncRNA		NC_025996.1	56320633	56326148	-	LOC105044289	Sense-overlapped	Sense-overlapped	NC_025996.1	56320009	56330392	-	XP_019705828.1	PREDICTED: uncharacterized protein LOC105044289 [Elaeis guineensis]
MSTRG.14243	Sense-lncRNA		NC_025997.1	3426791	3431627	-	LOC105044668	Sense-overlapped	Sense-overlapped	NC_025997.1	3429413	3446002	-	XP_010920946.1	PREDICTED: DNA repair protein RAD51 homolog 2 isoform X1 [Elaeis guineensis]
MSTRG.16331	Intronic-lncRNA		NC_025997.1	46645014	46646713	+	LOC105045810	Sense-overlapped	not overlapped	NC_025997.1	46641682	46677524	+	XP_010922514.1	PREDICTED: V-type proton ATPase subunit a1 [Elaeis guineensis]
MSTRG.16686	Sense-lncRNA		NC_025997.1	50435121	50436546	-	LOC105046283	Sense-overlapped	Sense-overlapped	NC_025997.1	50435765	50443055	-	XP_019706283.1	PREDICTED: acyl-coenzyme A thioesterase 13 [Elaeis guineensis]
MSTRG.16727	Sense-lncRNA		NC_025997.1	50920351	50921677	+	LOC105046250	Sense-overlapped	Sense-overlapped	NC_025997.1	50910180	50921226	+	XP_010923087.2	PREDICTED: cell division control protein 6 homolog [Elaeis guineensis]
MSTRG.17550	Intronic-lncRNA		NC_025998.1	18959031	18959914	+	LOC109505990	Sense-overlapped	not overlapped	NC_025998.1	18955430	18977262	+	XP_019706765.1	PREDICTED: LOW QUALITY PROTEIN: putative disease resistance protein RGA4 [Elaeis guineensis]
MSTRG.17550	Intronic-lncRNA		NC_025998.1	18959031	18959914	+	LOC105046834	Sense-overlapped	Sense-overlapped	NC_025998.1	18958871	18959914	+	ncRNA	lncRNA
MSTRG.17965	Sense-lncRNA		NC_025998.1	29911006	29913723	-	LOC105047136	Sense-overlapped	Sense-overlapped	NC_025998.1	29913391	29913723	-	XP_010924248.1	PREDICTED: extensin-2-like [Elaeis guineensis]
MSTRG.18575	Sense-lncRNA		NC_025998.1	40535099	40537724	+	LOC105047567	Sense-overlapped	Sense-overlapped	NC_025998.1	40534145	40536615	+	XP_010924845.1	PREDICTED: transcription factor TRY [Elaeis guineensis]
MSTRG.18891	Sense-lncRNA		NC_025999.1	338979	340498	-	LOC105048030	Sense-overlapped	Sense-overlapped	NC_025999.1	338902	356213	-	pseudogene
MSTRG.19402	Sense-lncRNA		NC_025999.1	7172450	7173145	-	LOC105048186	Sense-overlapped	Sense-overlapped	NC_025999.1	7172422	7175532	-	XP_010925707.1	PREDICTED: glucan endo-1,3-beta-glucosidase 11 isoform X2 [Elaeis guineensis]
MSTRG.19501	Sense-lncRNA		NC_025999.1	8402574	8411636	-	LOC105048253	Sense-overlapped	Sense-overlapped	NC_025999.1	8393242	8411638	-	XP_010925810.1	PREDICTED: U11/U12 small nuclear ribonucleoprotein 59 kDa protein-like [Elaeis guineensis]
MSTRG.21016	Sense-lncRNA		NC_025999.1	41543825	41545405	-	LOC105049309	Sense-overlapped	Sense-overlapped	NC_025999.1	41520515	41544372	-	XP_019707558.1	PREDICTED: uncharacterized protein LOC105049309 [Elaeis guineensis]
MSTRG.21758	Intronic-lncRNA		NC_026000.1	15844282	15844732	+	LOC105049814	Sense-overlapped	not overlapped	NC_026000.1	15832711	15847350	+	XP_010927879.1	PREDICTED: pentatricopeptide repeat-containing protein At1g10270-like [Elaeis guineensis]
MSTRG.22652	Sense-lncRNA		NC_026000.1	31726456	31739985	-	LOC105050420	Sense-overlapped	Sense-overlapped	NC_026000.1	31726048	31729767	-	pseudogene
MSTRG.24305	Sense-lncRNA		NC_026001.1	27711166	27712591	+	LOC105051550	Sense-overlapped	Sense-overlapped	NC_026001.1	27704456	27712591	+	XP_010930350.1	PREDICTED: protein FAR1-RELATED SEQUENCE 5-like [Elaeis guineensis]
MSTRG.24992	Sense-lncRNA		NC_026001.1	37759279	37760688	-	LOC105052056	Sense-overlapped	Sense-overlapped	NC_026001.1	37724727	37760804	-	XP_019708433.1	PREDICTED: uncharacterized protein LOC105052056 isoform X1 [Elaeis guineensis]
MSTRG.25883	Sense-lncRNA		NC_026002.1	17758408	17763317	-	LOC105052765	Sense-overlapped	Sense-overlapped	NC_026002.1	17759911	17763317	-	XP_010932006.1	PREDICTED: pentatricopeptide repeat-containing protein At3g06920 [Elaeis guineensis]
MSTRG.28259	Sense-lncRNA		NC_026003.1	28728659	28731220	-	LOC105054493	Sense-overlapped	Sense-overlapped	NC_026003.1	28729096	28731357	-	ncRNA	lncRNA
MSTRG.28917	Sense-lncRNA		NC_026004.1	14517412	14521637	-	LOC105054965	Sense-overlapped	Sense-overlapped	NC_026004.1	14517412	14518359	-	pseudogene
MSTRG.28990	Intronic-lncRNA		NC_026004.1	15650114	15650887	+	LOC105054926	Sense-overlapped	not overlapped	NC_026004.1	15630147	15652650	+	XP_010934879.1	PREDICTED: pentatricopeptide repeat-containing protein At1g71210 [Elaeis guineensis]
MSTRG.29731	Sense-lncRNA		NC_026004.1	24943372	24944016	-	LOC105055607	Sense-overlapped	Sense-overlapped	NC_026004.1	24943225	24948950	-	XP_019709619.1	PREDICTED: uncharacterized protein LOC105055607 [Elaeis guineensis]
MSTRG.32915	Sense-lncRNA		NC_026006.1	23435847	23438948	-	LOC105057507	Sense-overlapped	Sense-overlapped	NC_026006.1	7549618	7551070	+	ncRNA	lncRNA
MSTRG.33172	Sense-lncRNA		NC_026007.1	7978700	7981678	-	LOC105058051	Sense-overlapped	Sense-overlapped	NC_026007.1	7979395	7991382	-	XP_010939131.1	PREDICTED: integrator complex subunit 3 [Elaeis guineensis]
MSTRG.33718	Intronic-lncRNA		NC_026007.1	16948574	16950443	+	LOC105058395	Sense-overlapped	not overlapped	NC_026007.1	16943025	16951641	+	XP_019710786.1	PREDICTED: uncharacterized protein LOC105058395 [Elaeis guineensis]
MSTRG.33718	Intronic-lncRNA		NC_026007.1	16948574	16950443	+	LOC105058396	Sense-overlapped	not overlapped	NC_026007.1	16952202	16957836	+	XP_010939622.1	PREDICTED: metallophosphoesterase 1-like [Elaeis guineensis]
MSTRG.34104	Intronic-lncRNA		NC_026007.1	22008663	22012163	-	LOC105058689	Sense-overlapped	not overlapped	NC_026007.1	21974030	22022024	-	XP_010940001.2	PREDICTED: THO complex subunit 2-like isoform X2 [Elaeis guineensis]
MSTRG.35374	Intronic-lncRNA		NC_026008.1	18751988	18755221	+	LOC105059555	Sense-overlapped	not overlapped	NC_026008.1	18748205	18756754	+	XP_010941185.1	PREDICTED: stomatin-like protein 2, mitochondrial [Elaeis guineensis]
MSTRG.35687	Intronic-lncRNA		NW_011550905.1	1626381	1628536	+	LOC105059792	Sense-overlapped	not overlapped	NW_011550905.1	1620296	1679836	+	XP_019711205.1	PREDICTED: 40S ribosomal protein S12 isoform X2 [Elaeis guineensis]
MSTRG.36438	Intronic-lncRNA		NW_011550907.1	2950854	2957108	+	LOC105060269	Sense-overlapped	not overlapped	NW_011550907.1	2931029	2964699	+	XP_019701275.1	PREDICTED: methyl-CpG-binding domain-containing protein 9-like isoform X2 [Elaeis guineensis]
MSTRG.36443	Sense-lncRNA		NW_011550907.1	3093278	3096224	+	LOC105060272	Sense-overlapped	Sense-overlapped	NW_011550907.1	3093242	3101403	+	XP_010942222.1	PREDICTED: protein FLX-like 2 isoform X2 [Elaeis guineensis]
MSTRG.36684	Intronic-lncRNA		NW_011550909.1	2070889	2142487	+	LOC105060444	Sense-overlapped	not overlapped	NW_011550909.1	2065959	2154326	+	XP_010942456.1	PREDICTED: protein EFFECTOR OF TRANSCRIPTION 2 isoform X1 [Elaeis guineensis]
MSTRG.36736	Sense-lncRNA		NW_011550910.1	199930	200451	-	LOC105060485	Sense-overlapped	Sense-overlapped	NW_011550910.1	187347	200451	-	pseudogene
MSTRG.36890	Intronic-lncRNA		NW_011550910.1	2384569	2384897	-	LOC105060570	Sense-overlapped	not overlapped	NW_011550910.1	2381133	2400253	-	XP_010942643.1	PREDICTED: phosphoribosylaminoimidazole-succinocarboxamide synthase, chloroplastic isoform X1 [Elaeis guineensis]
MSTRG.36944	Sense-lncRNA		NW_011550911.1	752433	755548	+	LOC105060631	Sense-overlapped	Sense-overlapped	NW_011550911.1	748583	755515	+	XP_010942720.1	PREDICTED: uncharacterized protein LOC105060631 [Elaeis guineensis]
MSTRG.37088	Sense-lncRNA		NW_011550912.1	1004780	1009739	-	LOC105060631	Sense-overlapped	Sense-overlapped	NW_011550912.1	748583	755515	+	XP_010942720.1	PREDICTED: uncharacterized protein LOC105060631 [Elaeis guineensis]
MSTRG.38069	Intronic-lncRNA		NW_011550923.1	1138746	1139425	-	LOC105061299	Sense-overlapped	not overlapped	NW_011550923.1	1132053	1196565	-	XP_010943606.1	PREDICTED: probable WRKY transcription factor 20 isoform X2 [Elaeis guineensis]
MSTRG.38824	Intronic-lncRNA		NW_011550940.1	718349	721010	+	LOC105032008	Sense-overlapped	not overlapped	NW_011550940.1	712248	741513	+	XP_010904625.1	PREDICTED: protein MULTIPOLAR SPINDLE 1 isoform X1 [Elaeis guineensis]
MSTRG.39285	Intronic-lncRNA		NW_011550948.1	918542	920519	+	LOC105032287	Sense-overlapped	not overlapped	NW_011550948.1	914204	952533	+	XP_019701792.1	PREDICTED: putative UPF0481 protein At3g02645 isoform X2 [Elaeis guineensis]
MSTRG.39395	Intronic-lncRNA		NW_011550950.1	1104733	1104970	+	LOC105032328	Sense-overlapped	not overlapped	NW_011550950.1	1049937	1142070	+	XP_010905047.1	PREDICTED: probable serine/threonine-protein kinase PIX13 isoform X4 [Elaeis guineensis]
MSTRG.39624	Sense-lncRNA		NW_011550955.1	705090	720330	-	LOC105032443	Sense-overlapped	Sense-overlapped	NW_011550955.1	705090	733785	-	XP_019701856.1	PREDICTED: LOW QUALITY PROTEIN: SWI/SNF complex component SNF12 homolog [Elaeis guineensis]
MSTRG.39993	Sense-lncRNA		NW_011550965.1	296912	298745	-	LOC105032630	Sense-overlapped	Sense-overlapped	NW_011550965.1	296912	309078	-	XP_010905427.1	PREDICTED: U3 snoRNP-associated protein-like YAOH [Elaeis guineensis]
MSTRG.40792	Sense-lncRNA		NW_011550991.1	861096	862007	-	LOC105032992	Sense-overlapped	Sense-overlapped	NW_011550991.1	861084	898747	-	XP_019702059.1	PREDICTED: putative cysteine-rich receptor-like protein kinase 23 [Elaeis guineensis]
MSTRG.40912	Sense-lncRNA		NW_011550995.1	1166234	1168391	-	LOC105033065	Sense-overlapped	Sense-overlapped	NW_011550995.1	1166603	1168391	-	XP_010906018.1	PREDICTED: methyltransferase-like protein 13 [Elaeis guineensis]
MSTRG.41087	Intronic-lncRNA		NW_011551005.1	209067	211260	+	LOC105033147	Sense-overlapped	not overlapped	NW_011551005.1	199081	284172	+	XP_019702104.1	PREDICTED: exportin-7-B-like [Elaeis guineensis]
MSTRG.41099	Intronic-lncRNA		NW_011551006.1	124028	126730	+	LOC105033152	Sense-overlapped	not overlapped	NW_011551006.1	114913	151902	+	XP_010906135.1	PREDICTED: protein LEO1 homolog [Elaeis guineensis]
MSTRG.41141	Intronic-lncRNA		NW_011551006.1	743708	749786	+	LOC105033170	Sense-overlapped	not overlapped	NW_011551006.1	741822	751796	+	pseudogene
MSTRG.41141	Sense-lncRNA		NW_011551006.1	743708	749786	+	LOC105033169	Sense-overlapped	Sense-overlapped	NW_011551006.1	743668	745166	+	ncRNA	lncRNA
MSTRG.42134	Intronic-lncRNA		NW_011551051.1	56875	60206	+	LOC105033705	Sense-overlapped	not overlapped	NW_011551051.1	54138	65388	+	XP_010906907.1	PREDICTED: LOW QUALITY PROTEIN: probable E3 ubiquitin-protein ligase ARI2 [Elaeis guineensis]
MSTRG.42406	Intronic-lncRNA		NW_011551066.1	353116	353788	+	LOC105033845	Sense-overlapped	not overlapped	NW_011551066.1	288688	455014	+	XP_019702346.1	PREDICTED: Niemann-Pick C1 protein-like [Elaeis guineensis]
MSTRG.43086	Sense-lncRNA		NW_011551115.1	386684	388257	-	LOC105034124	Sense-overlapped	Sense-overlapped	NW_011551115.1	385242	401796	-	XP_010907466.1	PREDICTED: uncharacterized protein LOC105034124 [Elaeis guineensis]
MSTRG.43587	Intronic-lncRNA		NW_011551151.1	365511	373872	-	LOC105034310	Sense-overlapped	not overlapped	NW_011551151.1	345660	383575	-	XP_019702511.1	PREDICTED: protein IQ-DOMAIN 1-like [Elaeis guineensis]
MSTRG.44223	Sense-lncRNA		NW_011551216.1	280624	281959	-	LOC105034519	Sense-overlapped	Sense-overlapped	NW_011551216.1	267355	383470	-	XP_010908020.1	PREDICTED: uncharacterized protein LOC105034519 [Elaeis guineensis]
MSTRG.44443	Intronic-lncRNA		NW_011551244.1	96751	111684	-	LOC105034623	Sense-overlapped	not overlapped	NW_011551244.1	85212	118101	-	pseudogene
MSTRG.44444	Intronic-lncRNA		NW_011551244.1	112880	115010	-	LOC105034623	Sense-overlapped	not overlapped	NW_011551244.1	85212	118101	-	pseudogene
MSTRG.44442	Sense-lncRNA		NW_011551244.1	116508	120854	-	LOC105034623	Sense-overlapped	Sense-overlapped	NW_011551244.1	85212	118101	-	pseudogene
MSTRG.45667	Sense-lncRNA		NW_011551426.1	45409	47197	+	LOC105035005	Sense-overlapped	Sense-overlapped	NW_011551426.1	36566	47055	+	XP_010908690.1	PREDICTED: transcription termination factor MTERF9, chloroplastic-like [Elaeis guineensis]
MSTRG.47291	Intronic-lncRNA		NW_011551897.1	92575	93911	+	LOC105035510	Sense-overlapped	not overlapped	NW_011551897.1	85582	114587	+	XP_010909391.1	PREDICTED: uncharacterized protein LOC105035510 isoform X1 [Elaeis guineensis]
MSTRG.49561	Sense-lncRNA		NW_011553319.1	31898	41070	-	LOC105036090	Sense-overlapped	Sense-overlapped	NW_011553319.1	29902	33871	-	pseudogene
MSTRG.52878	Sense-lncRNA		NW_011562996.1	1	2436	-	LOC105036989	Sense-overlapped	Sense-overlapped	NW_011562996.1	1297	2436	-	XP_010911004.1	PREDICTED: vegetative cell wall protein gp1-like [Elaeis guineensis]
MSTRG.54482	Sense-lncRNA		NW_011571198.1	458	2747	+	LOC109505330	Sense-overlapped	Sense-overlapped	NW_011571198.1	239	2244	+	XP_019703364.1	PREDICTED: uncharacterized protein LOC109505330 [Elaeis guineensis]
MSTRG.1749	lincRNA		NC_025993.1	21405307	21405769	-	LOC105047386	flanking gene within 2k distance	not overlapped	NC_025993.1	21407752	21429718	-	XP_010924606.1	PREDICTED: uncharacterized PKHD-type hydroxylase At1g22950 [Elaeis guineensis]
MSTRG.2423	lincRNA		NC_025993.1	30787674	30788501	-	LOC105052619	flanking gene within 2k distance	not overlapped	NC_025993.1	30789516	30811020	-	pseudogene
MSTRG.4003	lincRNA		NC_025993.1	61666996	61667564	+	LOC105032305	flanking gene within 2k distance	not overlapped	NC_025993.1	61662449	61666555	+	ncRNA	lncRNA
MSTRG.4003	lincRNA		NC_025993.1	61666996	61667564	+	LOC105032316	flanking gene within 2k distance	not overlapped	NC_025993.1	61669344	61680786	+	ncRNA	lncRNA
MSTRG.4268	lincRNA		NC_025993.1	68178795	68180235	+	LOC105034302	flanking gene within 2k distance	not overlapped	NC_025993.1	68173598	68178606	+	XP_019702544.1	PREDICTED: heterogeneous nuclear ribonucleoprotein 1 isoform X1 [Elaeis guineensis]
MSTRG.4377	lincRNA		NC_025994.1	1997518	2001983	+	LOC105035093	flanking gene within 2k distance	not overlapped	NC_025994.1	2003130	2009914	+	XP_019704280.1	PREDICTED: protein FAR1-RELATED SEQUENCE 6-like isoform X1 [Elaeis guineensis]
MSTRG.6629	lincRNA		NC_025994.1	45509940	45512408	+	LOC105039207	flanking gene within 2k distance	not overlapped	NC_025994.1	45513804	45515407	+	XP_010913585.1	PREDICTED: putative F-box protein At1g60370 [Elaeis guineensis]
MSTRG.7108	lincRNA		NC_025994.1	52309197	52312274	+	LOC105039424	flanking gene within 2k distance	not overlapped	NC_025994.1	52306344	52308409	+	XP_010913859.1	PREDICTED: LOW QUALITY PROTEIN: AT-hook motif nuclear-localized protein 25-like [Elaeis guineensis]
MSTRG.8183	lincRNA		NC_025995.1	3229683	3237282	+	LOC105040314	flanking gene within 2k distance	not overlapped	NC_025995.1	3237473	3242760	+	ncRNA	lncRNA
MSTRG.8209	lincRNA		NC_025995.1	3531947	3532410	-	LOC109505586	flanking gene within 2k distance	not overlapped	NC_025995.1	3532619	3534048	-	ncRNA	lncRNA
MSTRG.8225	lincRNA		NC_025995.1	3876229	3878066	-	LOC105040362	flanking gene within 2k distance	not overlapped	NC_025995.1	3879575	3882232	-	XP_010915151.1	PREDICTED: uncharacterized protein LOC105040362 [Elaeis guineensis]
MSTRG.9189	lincRNA		NC_025995.1	16791223	16796924	-	LOC105041014	flanking gene within 2k distance	not overlapped	NC_025995.1	16789524	16790553	-	XP_010916098.1	PREDICTED: AT-hook motif nuclear-localized protein 16-like [Elaeis guineensis]
MSTRG.9372	lincRNA		NC_025995.1	19261929	19326014	-	LOC105041142	flanking gene within 2k distance	not overlapped	NC_025995.1	19326885	19329520	-	XP_010916283.1	PREDICTED: uncharacterized protein LOC105041142 isoform X2 [Elaeis guineensis]
MSTRG.9396	lincRNA		NC_025995.1	19589250	19594183	+	LOC105041161	flanking gene within 2k distance	not overlapped	NC_025995.1	19584963	19589097	+	ncRNA	lncRNA
MSTRG.9931	lincRNA		NC_025995.1	27027248	27031724	-	LOC105041652	flanking gene within 2k distance	not overlapped	NC_025995.1	27033145	27035829	-	XP_010916925.1	PREDICTED: uncharacterized protein LOC105041652 [Elaeis guineensis]
MSTRG.12405	lincRNA		NC_025996.1	34463175	34467555	-	LOC105043190	flanking gene within 2k distance	not overlapped	NC_025996.1	34468605	34470377	-	XP_010918949.1	PREDICTED: uncharacterized protein LOC105043190 isoform X2 [Elaeis guineensis]
MSTRG.13318	lincRNA		NC_025996.1	48020938	48021670	+	LOC105043830	flanking gene within 2k distance	not overlapped	NC_025996.1	48021881	48033543	+	XP_019705718.1	PREDICTED: probable methyltransferase PMT2 isoform X1 [Elaeis guineensis]
MSTRG.13346	lincRNA		NC_025996.1	48278489	48288912	-	LOC109505756	flanking gene within 2k distance	not overlapped	NC_025996.1	48275831	48277566	-	pseudogene
MSTRG.13498	lincRNA		NC_025996.1	50314787	50315284	+	LOC105043984	flanking gene within 2k distance	not overlapped	NC_025996.1	50308767	50312999	+	ncRNA	lncRNA
MSTRG.13556	lincRNA		NC_025996.1	51167915	51168821	+	LOC105044029	flanking gene within 2k distance	not overlapped	NC_025996.1	51159248	51166395	+	XP_019705478.1	PREDICTED: protein FREE1-like [Elaeis guineensis]
MSTRG.13658	lincRNA		NC_025996.1	53010542	53011421	+	LOC105044238	flanking gene within 2k distance	not overlapped	NC_025996.1	53006531	53010385	+	XP_010920365.2	PREDICTED: subtilisin-like protease SBT3.9 [Elaeis guineensis]
MSTRG.14885	lincRNA		NC_025997.1	12725923	12726959	+	LOC105045122	flanking gene within 2k distance	not overlapped	NC_025997.1	12727530	12728123	+	XP_019706124.1	PREDICTED: GTP-binding protein SAR1A, partial [Elaeis guineensis]
MSTRG.15267	lincRNA		NC_025997.1	24825686	24860508	+	LOC105045313	flanking gene within 2k distance	not overlapped	NC_025997.1	24861299	24874009	+	XP_010921853.1	PREDICTED: pre-rRNA-processing protein ESF2 isoform X2 [Elaeis guineensis]
MSTRG.15330	lincRNA		NC_025997.1	27271421	27281312	+	LOC105045353	flanking gene within 2k distance	not overlapped	NC_025997.1	27267032	27271109	+	pseudogene
MSTRG.15597	lincRNA		NC_025997.1	34019513	34024837	-	LOC105045486	flanking gene within 2k distance	not overlapped	NC_025997.1	34014266	34018226	-	XP_010922082.1	PREDICTED: putative disease resistance protein RGA1 [Elaeis guineensis]
MSTRG.15774	lincRNA		NC_025997.1	38434981	38437114	+	LOC105045606	flanking gene within 2k distance	not overlapped	NC_025997.1	38432466	38434000	+	pseudogene
MSTRG.15884	lincRNA		NC_025997.1	40460897	40471079	-	LOC105046090	flanking gene within 2k distance	not overlapped	NC_025997.1	40457584	40459046	-	XP_010922888.1	PREDICTED: uncharacterized protein At5g19025-like [Elaeis guineensis]
MSTRG.15884	lincRNA		NC_025997.1	40460897	40471079	-	LOC105046088	flanking gene within 2k distance	not overlapped	NC_025997.1	40472860	40474191	-	XP_010922887.1	PREDICTED: uncharacterized protein LOC105046088 isoform X2 [Elaeis guineensis]
MSTRG.16563	lincRNA		NC_025997.1	49043527	49051020	-	LOC105045631	flanking gene within 2k distance	not overlapped	NC_025997.1	49039862	49042044	-	XP_019705882.1	PREDICTED: E3 ubiquitin-protein ligase RDUF1 [Elaeis guineensis]
MSTRG.17816	lincRNA		NC_025998.1	27257974	27258340	-	LOC105047007	flanking gene within 2k distance	not overlapped	NC_025998.1	27206343	27257596	-	XP_019706940.1	PREDICTED: CBL-interacting protein kinase 8 isoform X3 [Elaeis guineensis]
MSTRG.17928	lincRNA		NC_025998.1	29441322	29442037	+	LOC109504780	flanking gene within 2k distance	not overlapped	NC_025998.1	29442625	29448159	+	pseudogene
MSTRG.18243	lincRNA		NC_025998.1	35609143	35614733	-	LOC105047303	flanking gene within 2k distance	not overlapped	NC_025998.1	35616144	35619723	-	XP_010924477.1	PREDICTED: probable inositol oxygenase [Elaeis guineensis]
MSTRG.18914	lincRNA		NC_025999.1	795798	797107	-	LOC105047836	flanking gene within 2k distance	not overlapped	NC_025999.1	784164	795327	-	XP_010925238.1	PREDICTED: probable cellulose synthase A catalytic subunit 1 [UDP-forming] [Elaeis guineensis]
MSTRG.19344	lincRNA		NC_025999.1	6306434	6306802	-	LOC105048137	flanking gene within 2k distance	not overlapped	NC_025999.1	6296742	6306068	-	XP_010925649.1	PREDICTED: mitogen-activated protein kinase 1-like [Elaeis guineensis]
MSTRG.19779	lincRNA		NC_025999.1	12140024	12140419	+	LOC105048489	flanking gene within 2k distance	not overlapped	NC_025999.1	12132284	12138026	+	XP_010926102.1	PREDICTED: probable UDP-3-O-acyl-N-acetylglucosamine deacetylase 2 isoform X1 [Elaeis guineensis]
MSTRG.20304	lincRNA		NC_025999.1	21077915	21085480	-	LOC105048842	flanking gene within 2k distance	not overlapped	NC_025999.1	21063397	21076114	-	XP_010926617.1	PREDICTED: basic leucine zipper and W2 domain-containing protein 2 [Elaeis guineensis]
MSTRG.20304	lincRNA		NC_025999.1	21077915	21085480	-	LOC105048843	flanking gene within 2k distance	not overlapped	NC_025999.1	21087474	21119876	-	XP_010926619.1	PREDICTED: aspartic proteinase-like protein 2 isoform X2 [Elaeis guineensis]
MSTRG.20757	lincRNA		NC_025999.1	36555275	36592294	-	LOC105049092	flanking gene within 2k distance	not overlapped	NC_025999.1	36592895	36594270	-	XP_010926949.1	PREDICTED: uncharacterized protein LOC105049092 [Elaeis guineensis]
MSTRG.21019	lincRNA		NC_025999.1	41648900	41651258	+	LOC105049305	flanking gene within 2k distance	not overlapped	NC_025999.1	41645989	41647407	+	ncRNA	lncRNA
MSTRG.21649	lincRNA		NC_026000.1	11356864	11358158	+	LOC109506144	flanking gene within 2k distance	not overlapped	NC_026000.1	11351561	11356837	+	pseudogene
MSTRG.22099	lincRNA		NC_026000.1	23969180	23970228	+	LOC105050008	flanking gene within 2k distance	not overlapped	NC_026000.1	23970349	23979645	+	XP_010928150.1	PREDICTED: 65-kDa microtubule-associated protein 1-like [Elaeis guineensis]
MSTRG.22839	lincRNA		NC_026000.1	34461630	34465502	+	LOC105050613	flanking gene within 2k distance	not overlapped	NC_026000.1	34453297	34460346	+	XP_010928994.1	PREDICTED: APO protein 1, chloroplastic [Elaeis guineensis]
MSTRG.22839	lincRNA		NC_026000.1	34461630	34465502	+	LOC105050615	flanking gene within 2k distance	not overlapped	NC_026000.1	34465853	34483228	+	XP_010928998.1	PREDICTED: flowering time control protein FPA-like isoform X1 [Elaeis guineensis]
MSTRG.24129	lincRNA		NC_026001.1	24475212	24477725	-	LOC109506272	flanking gene within 2k distance	not overlapped	NC_026001.1	24440704	24474681	-	ncRNA	lncRNA
MSTRG.24938	lincRNA		NC_026001.1	37211990	37215109	+	LOC105052088	flanking gene within 2k distance	not overlapped	NC_026001.1	37205642	37210924	+	XP_019708269.1	PREDICTED: ubiquitin-conjugating enzyme E2 variant 1D-like [Elaeis guineensis]
MSTRG.24938	lincRNA		NC_026001.1	37211990	37215109	+	LOC105052087	flanking gene within 2k distance	not overlapped	NC_026001.1	37215648	37217025	+	pseudogene
MSTRG.25525	lincRNA		NC_026002.1	12691581	12701825	-	LOC105052741	flanking gene within 2k distance	not overlapped	NC_026002.1	12685719	12690142	-	XP_010931979.1	PREDICTED: succinate dehydrogenase subunit 4, mitochondrial [Elaeis guineensis]
MSTRG.26385	lincRNA		NC_026002.1	23963485	23963933	-	LOC109506347	flanking gene within 2k distance	not overlapped	NC_026002.1	23958580	23962741	-	XP_019708824.1	PREDICTED: accelerated cell death 11-like [Elaeis guineensis]
MSTRG.26849	lincRNA		NC_026002.1	31228507	31230438	-	LOC105053412	flanking gene within 2k distance	not overlapped	NC_026002.1	31231705	31233711	-	XP_010932848.1	PREDICTED: uncharacterized protein LOC105053412 isoform X2 [Elaeis guineensis]
MSTRG.26930	lincRNA		NC_026003.1	2696970	2697286	+	LOC105053533	flanking gene within 2k distance	not overlapped	NC_026003.1	2699167	2702105	+	XP_010933042.1	PREDICTED: protein Rf1, mitochondrial-like [Elaeis guineensis]
MSTRG.27710	lincRNA		NC_026003.1	21481956	21491343	-	LOC105054032	flanking gene within 2k distance	not overlapped	NC_026003.1	21492714	21503887	-	XP_010933711.1	PREDICTED: 3-hydroxyisobutyryl-CoA hydrolase-like protein 2, mitochondrial [Elaeis guineensis]
MSTRG.27918	lincRNA		NC_026003.1	24191398	24197911	-	LOC105053901	flanking gene within 2k distance	not overlapped	NC_026003.1	24199471	24210437	-	XP_010933540.1	PREDICTED: phosphatidylinositol glycan anchor biosynthesis class U protein isoform X1 [Elaeis guineensis]
MSTRG.28205	lincRNA		NC_026003.1	27989088	27991676	-	LOC105054450	flanking gene within 2k distance	not overlapped	NC_026003.1	27986790	27988716	-	XP_010934255.1	PREDICTED: protein bfr2-like [Elaeis guineensis]
MSTRG.28431	lincRNA		NC_026004.1	3748081	3751438	-	LOC105054609	flanking gene within 2k distance	not overlapped	NC_026004.1	3745102	3746677	-	XP_010934470.1	PREDICTED: heat stress transcription factor B-2b-like [Elaeis guineensis]
MSTRG.28929	lincRNA		NC_026004.1	14641272	14644908	-	LOC105054959	flanking gene within 2k distance	not overlapped	NC_026004.1	14644965	14646178	-	XP_010934932.1	PREDICTED: E3 ubiquitin-protein ligase RHA1B-like [Elaeis guineensis]
MSTRG.30653	lincRNA		NC_026005.1	14049246	14052538	-	LOC105056258	flanking gene within 2k distance	not overlapped	NC_026005.1	14053729	14054999	-	ncRNA	lncRNA
MSTRG.30654	lincRNA		NC_026005.1	14053573	14054999	-	LOC105056259	flanking gene within 2k distance	not overlapped	NC_026005.1	14055714	14066392	-	XP_010936696.1	PREDICTED: U-box domain-containing protein 5-like [Elaeis guineensis]
MSTRG.31597	lincRNA		NC_026006.1	1045470	1047338	+	LOC105056982	flanking gene within 2k distance	not overlapped	NC_026006.1	1040391	1044525	+	XP_010937695.1	PREDICTED: soluble inorganic pyrophosphatase 4 [Elaeis guineensis]
MSTRG.31864	lincRNA		NC_026006.1	3646478	3649055	-	LOC105057145	flanking gene within 2k distance	not overlapped	NC_026006.1	3651002	3657338	-	XP_010937930.1	PREDICTED: gamma-interferon-inducible lysosomal thiol reductase isoform X2 [Elaeis guineensis]
MSTRG.31908	lincRNA		NC_026006.1	4088212	4097970	-	LOC105057178	flanking gene within 2k distance	not overlapped	NC_026006.1	4086784	4087590	-	ncRNA	lncRNA
MSTRG.31920	lincRNA		NC_026006.1	4203974	4211679	-	LOC105057180	flanking gene within 2k distance	not overlapped	NC_026006.1	4201123	4202191	-	XP_010937973.1	PREDICTED: uncharacterized protein LOC105057180 [Elaeis guineensis]
MSTRG.32195	lincRNA		NC_026006.1	7549594	7550926	+	LOC105057509	flanking gene within 2k distance	not overlapped	NC_026006.1	7542373	7547664	+	XP_010938444.1	PREDICTED: protein indeterminate-domain 2-like [Elaeis guineensis]
MSTRG.32227	lincRNA		NC_026006.1	7954249	7956898	+	LOC105057490	flanking gene within 2k distance	not overlapped	NC_026006.1	7957091	7957873	+	XP_010938417.1	PREDICTED: protein RALF-like 33 [Elaeis guineensis]
MSTRG.32442	lincRNA		NC_026006.1	11403137	11403701	+	LOC105057745	flanking gene within 2k distance	not overlapped	NC_026006.1	11405099	11408781	+	ncRNA	lncRNA
MSTRG.32602	lincRNA		NC_026006.1	14369898	14381473	+	LOC105057727	flanking gene within 2k distance	not overlapped	NC_026006.1	14381506	14435721	+	XP_010938723.1	PREDICTED: protein N-terminal glutamine amidohydrolase [Elaeis guineensis]
MSTRG.34658	lincRNA		NC_026008.1	4106789	4114932	+	LOC105058932	flanking gene within 2k distance	not overlapped	NC_026008.1	4073217	4106293	+	XP_010940318.1	PREDICTED: vacuolar protein sorting-associated protein 41 homolog [Elaeis guineensis]
MSTRG.35465	lincRNA		NC_026008.1	19654148	19655296	-	LOC105059615	flanking gene within 2k distance	not overlapped	NC_026008.1	19657137	19667661	-	XP_010941285.1	PREDICTED: BRCA1-A complex subunit BRE [Elaeis guineensis]
MSTRG.35502	lincRNA		NC_026008.1	20218300	20221243	+	LOC105059644	flanking gene within 2k distance	not overlapped	NC_026008.1	20221323	20223211	+	XP_010941326.1	PREDICTED: pre-mRNA-processing factor 17 [Elaeis guineensis]
MSTRG.35597	lincRNA		NW_011550905.1	204286	204735	+	LOC105059740	flanking gene within 2k distance	not overlapped	NW_011550905.1	200454	202625	+	XP_010941462.1	PREDICTED: myb-related protein 315-like [Elaeis guineensis]
MSTRG.36456	lincRNA		NW_011550907.1	3448291	3460611	+	LOC105060282	flanking gene within 2k distance	not overlapped	NW_011550907.1	3439637	3448042	+	XP_010942232.1	PREDICTED: protein NSP-INTERACTING KINASE 1-like [Elaeis guineensis]
MSTRG.37370	lincRNA		NW_011550915.1	336400	339159	-	LOC105060866	flanking gene within 2k distance	not overlapped	NW_011550915.1	340116	348310	-	XP_010943018.1	PREDICTED: uncharacterized protein LOC105060866 [Elaeis guineensis]
MSTRG.37393	lincRNA		NW_011550915.1	922934	930969	-	LOC105060878	flanking gene within 2k distance	not overlapped	NW_011550915.1	922156	922782	-	XP_010943034.1	PREDICTED: polcalcin Phl p 7-like [Elaeis guineensis]
MSTRG.37682	lincRNA		NW_011550918.1	795486	802627	+	LOC105061072	flanking gene within 2k distance	not overlapped	NW_011550918.1	802866	803702	+	pseudogene
MSTRG.37946	lincRNA		NW_011550921.1	1612299	1614947	+	LOC105061219	flanking gene within 2k distance	not overlapped	NW_011550921.1	1596669	1610875	+	XP_019701580.1	PREDICTED: ankyrin repeat domain-containing protein, chloroplastic [Elaeis guineensis]
MSTRG.38361	lincRNA		NW_011550928.1	1492181	1492767	+	LOC105061412	flanking gene within 2k distance	not overlapped	NW_011550928.1	1488708	1491469	+	XP_010943754.1	PREDICTED: bidirectional sugar transporter SWEET13 isoform X1 [Elaeis guineensis]
MSTRG.40767	lincRNA		NW_011550991.1	187183	189902	+	LOC105032991	flanking gene within 2k distance	not overlapped	NW_011550991.1	85803	186936	+	XP_019702060.1	PREDICTED: protein DETOXIFICATION 29 isoform X1 [Elaeis guineensis]
MSTRG.40925	lincRNA		NW_011550996.1	457518	458756	+	LOC105033072	flanking gene within 2k distance	not overlapped	NW_011550996.1	455379	456926	+	XP_010906028.1	PREDICTED: uncharacterized protein LOC105033072 [Elaeis guineensis]
MSTRG.41420	lincRNA		NW_011551017.1	376438	381179	-	LOC105033323	flanking gene within 2k distance	not overlapped	NW_011551017.1	363150	376178	-	XP_019702170.1	PREDICTED: double-strand break repair protein MRE11-like isoform X2 [Elaeis guineensis]
MSTRG.41877	lincRNA		NW_011551039.1	262371	265010	+	LOC105033558	flanking gene within 2k distance	not overlapped	NW_011551039.1	266634	268599	+	ncRNA	lncRNA
MSTRG.43275	lincRNA		NW_011551125.1	377127	377654	+	LOC105034182	flanking gene within 2k distance	not overlapped	NW_011551125.1	263299	375776	+	XP_010907535.1	PREDICTED: DNA-binding protein SMUBP-2 isoform X1 [Elaeis guineensis]
MSTRG.47299	lincRNA		NW_011551901.1	147613	175280	+	LOC109505147	flanking gene within 2k distance	not overlapped	NW_011551901.1	145013	147448	+	pseudogene
MSTRG.48025	lincRNA		NW_011552211.1	68534	69401	-	LOC105035704	flanking gene within 2k distance	not overlapped	NW_011552211.1	69773	96652	-	XP_010909663.1	PREDICTED: uncharacterized protein LOC105035704 isoform X2 [Elaeis guineensis]
MSTRG.48295	lincRNA		NW_011552357.1	30281	31331	+	LOC105035759	flanking gene within 2k distance	not overlapped	NW_011552357.1	2811	30252	+	XP_019702990.1	PREDICTED: chloroplastic lipocalin isoform X1 [Elaeis guineensis]
MSTRG.48631	lincRNA		NW_011552527.1	67280	70042	-	LOC105035848	flanking gene within 2k distance	not overlapped	NW_011552527.1	65285	67232	-	pseudogene
MSTRG.48888	lincRNA		NW_011552704.1	7973	9157	-	LOC105035919	flanking gene within 2k distance	not overlapped	NW_011552704.1	5446	6126	-	XP_010909934.1	PREDICTED: agamous-like MADS-box protein AGL62 [Elaeis guineensis]
MSTRG.49901	lincRNA		NW_011553640.1	1727	2286	-	LOC105036161	flanking gene within 2k distance	not overlapped	NW_011553640.1	3467	3943	-	XP_010910214.1	PREDICTED: haloacid dehalogenase-like hydrolase domain-containing protein At2g33255 [Elaeis guineensis]
MSTRG.56087	lincRNA		NW_011581801.1	30	290	+	LOC105037702	flanking gene within 2k distance	not overlapped	NW_011581801.1	718	1786	+	pseudogene
MSTRG.892	NAT-lncRNA		NC_025993.1	10834826	10835152	+	LOC105041368	flanking gene within 2k distance	not overlapped	NC_025993.1	10829941	10833878	+	XP_010916623.1	PREDICTED: protein BZR1 homolog 3-like[Elaeis guineensis]
MSTRG.1427	NAT-lncRNA		NC_025993.1	17998166	17998477	+	LOC105043201	flanking gene within 2k distance	not overlapped	NC_025993.1	17993965	17996503	+	ncRNA	lncRNA
MSTRG.1977	NAT-lncRNA		NC_025993.1	23845698	23854301	+	LOC105045663	flanking gene within 2k distance	not overlapped	NC_025993.1	23841679	23843829	+	XP_010922331.1	PREDICTED: putative glutamine amidotransferase GAT1_2.1 [Elaeis guineensis]
MSTRG.3227	NAT-lncRNA		NC_025993.1	44118258	44131201	-	LOC105056965	flanking gene within 2k distance	not overlapped	NC_025993.1	44132462	44136700	-	XP_010937671.1	PREDICTED: putative methylesterase 11, chloroplastic isoform X1[Elaeis guineensis]
MSTRG.3874	NAT-lncRNA		NC_025993.1	59795950	59796335	-	LOC109506063	flanking gene within 2k distance	not overlapped	NC_025993.1	59797588	59800878	-	ncRNA	lncRNA
MSTRG.4063	NAT-lncRNA		NC_025993.1	62286109	62292971	-	LOC105032768	flanking gene within 2k distance	not overlapped	NC_025993.1	62294515	62296165	-	XP_010905633.1	PREDICTED: caffeoylshikimate esterase[Elaeis guineensis]
MSTRG.5276	NAT-lncRNA		NC_025994.1	21909210	21911875	+	LOC105038238	flanking gene within 2k distance	not overlapped	NC_025994.1	21906825	21908254	+	pseudogene
MSTRG.5756	NAT-lncRNA		NC_025994.1	29178284	29179661	+	LOC105038594	flanking gene within 2k distance	not overlapped	NC_025994.1	29168753	29177633	+	XP_010912745.2	PREDICTED: endoglucanase 12 [Elaeis guineensis]
MSTRG.7968	NAT-lncRNA		NC_025995.1	269440	270321	+	LOC105040166	flanking gene within 2k distance	not overlapped	NC_025995.1	265746	268239	+	XP_010914873.1	PREDICTED:LOW QUALITY PROTEIN: pentatricopeptide repeat-containing protein At4g32430, mitochondrial [Elaeis guineensis]
MSTRG.8710	NAT-lncRNA		NC_025995.1	10310920	10311356	+	LOC105040668	flanking gene within 2k distance	not overlapped	NC_025995.1	10298801	10309072	+	XP_010915617.1	PREDICTED: protein CHUP1, chloroplastic-like [Elaeis guineensis]
MSTRG.8771	NAT-lncRNA		NC_025995.1	11472372	11474870	+	LOC105040716	flanking gene within 2k distance	not overlapped	NC_025995.1	11465149	11471092	+	XP_010915675.1	PREDICTED: rhodanese-like domain-containing protein 4, chloroplastic[Elaeis guineensis]
MSTRG.8771	NAT-lncRNA		NC_025995.1	11472372	11474870	+	LOC105040717	flanking gene within 2k distance	not overlapped	NC_025995.1	11474901	11476546	+	ncRNA	lncRNA
MSTRG.12125	NAT-lncRNA		NC_025996.1	27970906	27971221	+	LOC105042968	flanking gene within 2k distance	not overlapped	NC_025996.1	27964218	27970547	+	XP_010918654.1	PREDICTED: RNA polymerase sigma factor sigB-like[Elaeis guineensis]
MSTRG.12975	NAT-lncRNA		NC_025996.1	43434143	43434526	+	LOC105043861	flanking gene within 2k distance	not overlapped	NC_025996.1	43430353	43432551	+	pseudogene
MSTRG.13883	NAT-lncRNA		NC_025996.1	56329071	56329558	+	LOC105044290	flanking gene within 2k distance	not overlapped	NC_025996.1	56330588	56339095	+	XP_019705827.1	PREDICTED: putative cyclin-B3-1 [Elaeis guineensis]
MSTRG.16321	NAT-lncRNA		NC_025997.1	46488443	46488758	+	LOC109505875	flanking gene within 2k distance	not overlapped	NC_025997.1	46486044	46486854	+	XP_019706229.1	PREDICTED: uncharacterized protein LOC109505875 [Elaeis guineensis]
MSTRG.16355	NAT-lncRNA		NC_025997.1	46916376	46916926	-	LOC105045793	flanking gene within 2k distance	not overlapped	NC_025997.1	46918055	46921304	-	XP_010922498.1	PREDICTED: L-ascorbate peroxidase, cytosolic-like [Elaeis guineensis]
MSTRG.16368	NAT-lncRNA		NC_025997.1	47067348	47068355	-	LOC105045786	flanking gene within 2k distance	not overlapped	NC_025997.1	47069353	47085941	-	XP_010922490.1	PREDICTED: leucine aminopeptidase isoform X1 [Elaeis guineensis]
MSTRG.18156	NAT-lncRNA		NC_025998.1	34345007	34346648	+	LOC105047234	flanking gene within 2k distance	not overlapped	NC_025998.1	34304937	34343215	+	XP_010924356.1	PREDICTED: protein TOM THREE HOMOLOG 1-like isoform X1 [Elaeis guineensis]
MSTRG.18348	NAT-lncRNA		NC_025998.1	36867825	36868530	+	LOC105047368	flanking gene within 2k distance	not overlapped	NC_025998.1	36847932	36866440	+	XP_010924583.1	PREDICTED: protein tesmin/TSO1-like CXC 5 isoform X1 [Elaeis guineensis]
MSTRG.18545	NAT-lncRNA		NC_025998.1	40108963	40109495	+	LOC105047546	flanking gene within 2k distance	not overlapped	NC_025998.1	40095973	40107600	+	XP_010924809.1	PREDICTED: putative glucose-6-phosphate 1-epimerase isoform X1 [Elaeis guineensis]
MSTRG.19685	NAT-lncRNA		NC_025999.1	11171841	11177429	-	LOC109506123	flanking gene within 2k distance	not overlapped	NC_025999.1	11177746	11223364	-	ncRNA	lncRNA
MSTRG.19686	NAT-lncRNA		NC_025999.1	11177530	11253097	-	LOC105048534	flanking gene within 2k distance	not overlapped	NC_025999.1	11171805	11177526	-	ncRNA	lncRNA
MSTRG.19796	NAT-lncRNA		NC_025999.1	12348448	12357153	+	LOC105048477	flanking gene within 2k distance	not overlapped	NC_025999.1	12344321	12346680	+	XP_010926085.1	PREDICTED: uncharacterized protein LOC105048477 [Elaeis guineensis]
MSTRG.21376	NAT-lncRNA		NC_026000.1	4870764	4878642	+	LOC105049563	flanking gene within 2k distance	not overlapped	NC_026000.1	4866956	4869194	+	ncRNA	lncRNA
MSTRG.21976	NAT-lncRNA		NC_026000.1	21422290	21423007	-	LOC105049946	flanking gene within 2k distance	not overlapped	NC_026000.1	21423664	21434487	-	XP_010928059.1	PREDICTED: histone acetyltransferase KAT6A isoform X2 [Elaeis guineensis]
MSTRG.22518	NAT-lncRNA		NC_026000.1	30159369	30168027	-	LOC105050580	flanking gene within 2k distance	not overlapped	NC_026000.1	30155547	30158837	-	pseudogene
MSTRG.24390	NAT-lncRNA		NC_026001.1	29279838	29280296	+	LOC105051871	flanking gene within 2k distance	not overlapped	NC_026001.1	29270693	29278817	+	XP_010930818.1	PREDICTED: calcium-dependent protein kinase 24 isoform X2 [Elaeis guineensis]
MSTRG.25577	NAT-lncRNA		NC_026002.1	13459248	13464547	+	LOC105052790	flanking gene within 2k distance	not overlapped	NC_026002.1	13465583	13478507	+	pseudogene
MSTRG.25721	NAT-lncRNA		NC_026002.1	16031152	16031676	+	TRNAG-UCC	flanking gene within 2k distance	not overlapped	NC_026002.1	16029540	16029611	+	ncRNA	lncRNA
MSTRG.26191	NAT-lncRNA		NC_026002.1	21647134	21648453	+	LOC105052970	flanking gene within 2k distance	not overlapped	NC_026002.1	21638046	21646061	+	XP_010932261.1	PREDICTED: E3 ubiquitin-protein ligase RGLG2-like [Elaeis guineensis]
MSTRG.29869	NAT-lncRNA		NC_026004.1	26751998	26752936	+	LOC105055774	flanking gene within 2k distance	not overlapped	NC_026004.1	26741056	26751951	+	XP_019709712.1	PREDICTED: ribokinase isoform X1 [Elaeis guineensis]
MSTRG.32418	NAT-lncRNA		NC_026006.1	11104899	11105726	-	LOC105057746	flanking gene within 2k distance	not overlapped	NC_026006.1	11105776	11106475	-	XP_010938738.1	PREDICTED: uncharacterized protein LOC105057746 [Elaeis guineensis]
MSTRG.33228	NAT-lncRNA		NC_026007.1	9344283	9347536	-	LOC105058270	flanking gene within 2k distance	not overlapped	NC_026007.1	9342192	9344216	-	pseudogene
MSTRG.33465	NAT-lncRNA		NC_026007.1	13239018	13247763	+	LOC105058190	flanking gene within 2k distance	not overlapped	NC_026007.1	13248934	13257141	+	XP_010939342.1	PREDICTED: uncharacterized protein LOC105058190 [Elaeis guineensis]
MSTRG.33984	NAT-lncRNA		NC_026007.1	20355655	20356675	+	LOC105058605	flanking gene within 2k distance	not overlapped	NC_026007.1	20352787	20354451	+	ncRNA	lncRNA
MSTRG.34288	NAT-lncRNA		NC_026007.1	23987014	23987432	-	LOC105058812	flanking gene within 2k distance	not overlapped	NC_026007.1	23988831	23997744	-	XP_010940167.1	PREDICTED: anthranilate phosphoribosyltransferase, chloroplastic isoform X1 [Elaeis guineensis]
MSTRG.34719	NAT-lncRNA		NC_026008.1	4891099	4894619	-	LOC105058893	flanking gene within 2k distance	not overlapped	NC_026008.1	4889514	4890781	-	XP_010940257.1	PREDICTED: glutathione S-transferase F12-like [Elaeis guineensis]
MSTRG.35147	NAT-lncRNA		NC_026008.1	15184621	15184904	+	LOC105059438	flanking gene within 2k distance	not overlapped	NC_026008.1	15167279	15183361	+	XP_010941033.1	PREDICTED: ADP-ribosylation factor-related protein 1-like isoform X1 [Elaeis guineensis]
MSTRG.35578	NAT-lncRNA		NC_026008.1	21260803	21261936	+	LOC105059697	flanking gene within 2k distance	not overlapped	NC_026008.1	21254330	21259111	+	XP_010941412.1	PREDICTED:small nuclear ribonucleoprotein SmD3b [Elaeis guineensis]
MSTRG.35835	NAT-lncRNA		NW_011550905.1	4060340	4061040	+	LOC105059880	flanking gene within 2k distance	not overlapped	NW_011550905.1	4036463	4059974	+	NP_001304661.1	PREDICTED:probable potassium transporter 11 [Elaeis guineensis]
MSTRG.36276	NAT-lncRNA		NW_011550907.1	702581	707914	-	LOC105060174	flanking gene within 2k distance	not overlapped	NW_011550907.1	709393	713617	-	XP_010942084.1	PREDICTED: ubiquitin-NEDD8-like protein RUB2 isoform X1 [Elaeis guineensis]
MSTRG.36420	NAT-lncRNA		NW_011550907.1	2728912	2729806	+	LOC105060254	flanking gene within 2k distance	not overlapped	NW_011550907.1	2706314	2727524	+	XP_010942178.1	PREDICTED: dynamin-2A-like isoform X1 [Elaeis guineensis]
MSTRG.37579	NAT-lncRNA		NW_011550917.1	483640	485062	-	LOC105061003	flanking gene within 2k distance	not overlapped	NW_011550917.1	487003	508518	-	XP_010943213.1	PREDICTED: protein MRG1 isoform X2 [Elaeis guineensis]
MSTRG.37859	NAT-lncRNA		NW_011550920.1	1826100	1827115	+	LOC105061171	flanking gene within 2k distance	not overlapped	NW_011550920.1	1817591	1824782	+	XP_010943445.1	PREDICTED:bZIP transcription factor 16-like isoform X2 [Elaeis guineensis]
MSTRG.41131	NAT-lncRNA		NW_011551006.1	600332	654435	-	LOC105033162	flanking gene within 2k distance	not overlapped	NW_011551006.1	589342	598499	-	XP_010906148.1	PREDICTED: protein CHLORORESPIRATORY REDUCTION 7, chloroplastic [Elaeis guineensis]
MSTRG.42622	NAT-lncRNA		NW_011551080.1	429207	429632	+	LOC105033947	flanking gene within 2k distance	not overlapped	NW_011551080.1	423041	428163	+	pseudogene
MSTRG.43297	NAT-lncRNA		NW_011551127.1	273725	312399	-	LOC105034192	flanking gene within 2k distance	not overlapped	NW_011551127.1	312982	316025	-	XP_010907547.1	PREDICTED:uncharacterized protein LOC105034192 [Elaeis guineensis]
MSTRG.16686	Sense-lncRNA		NC_025997.1	50435121	50436546	-	LOC105046379	flanking gene within 2k distance	not overlapped	NC_025997.1	50429018	50434939	-	XP_019706282.1	PREDICTED: uncharacterized protein LOC105046379 [Elaeis guineensis]
MSTRG.19501	Sense-lncRNA		NC_025999.1	8402574	8411636	-	LOC105048254	flanking gene within 2k distance	not overlapped	NC_025999.1	8413622	8429263	-	XP_010925813.1	PREDICTED: post-GPI attachment to proteins factor 3-like [Elaeis guineensis]
MSTRG.24992	Sense-lncRNA		NC_026001.1	37759279	37760688	-	LOC105052057	flanking gene within 2k distance	not overlapped	NC_026001.1	37760827	37762716	-	XP_019708438.1	PREDICTED: dof zinc finger protein DOF4.1 isoform X1 [Elaeis guineensis]
MSTRG.39993	Sense-lncRNA		NW_011550965.1	296912	298745	-	LOC105032629	flanking gene within 2k distance	not overlapped	NW_011550965.1	256431	295212	-	XP_010905424.1	PREDICTED: nuclear transcription factor Y subunit A-7-like isoform X2 [Elaeis guineensis]
MSTRG.40912	Sense-lncRNA		NW_011550995.1	1166234	1168391	-	LOC105033064	flanking gene within 2k distance	not overlapped	NW_011550995.1	1159763	1165469	-	XP_010906017.1	PREDICTED: serine carboxypeptidase II-3-like [Elaeis guineensis]
MSTRG.9212	lincRNA		NC_025995.1	17158177	17158690	+	LOC105041034	trans- regulatory target	not overlapped	NC_025995.1	17225259	17231268	+	XP_019704661.1	PREDICTED: Elaeis guineensis alpha-1,3-arabinosyltransferase XAT3 [Elaeis guineensis]
MSTRG.16214	NAT-lncRNA		NC_025997.1	45009382	45009715	-	LOC105061573	trans- regulatory target	not overlapped	NW_011550935.1	1154818	1158695	+	XP_010943972.1	PREDICTED: Elaeis guineensis protein FLX-like 1 [Elaeis guineensis]
MSTRG.16214	NAT-lncRNA		NC_025997.1	45009382	45009715	-	LOC105050859	trans- regulatory target	not overlapped	NC_025993.1	32245528	32257990	-	XP_029123049.1	PREDICTED: Elaeis guineensis protein FLX-like 1 [Elaeis guineensis]
MSTRG.20275	NAT-lncRNA		NC_025999.1	20307559	20308134	-	LOC105036630	trans- regulatory target	not overlapped	NW_011558659.1	1272	2329	-	pseudogene
MSTRG.23116	lincRNA		NC_026000.1	37781906	37783651	+	LOC105051313	trans- regulatory target	not overlapped	NC_026001.1	19793929	19798480	-	XP_010929984.1	PREDICTED: Elaeis guineensis ultraviolet-B receptor UVR8 [Elaeis guineensis]
MSTRG.23116	lincRNA		NC_026000.1	37781906	37783651	+	LOC105049589	trans- regulatory target	not overlapped	NC_026000.1	5111912	5114972	-	XP_029122181.1	PREDICTED: Elaeis guineensis RCC1 and BTB domain-containing protein 2-like[Elaeis guineensis]
MSTRG.24786	NAT-lncRNA		NC_026001.1	34338420	34338782	-	LOC105038353	trans- regulatory target	not overlapped	NC_025994.1	24238105	24239388	-	XP_010912442.1	PREDICTED: Elaeis guineensis abscisic stress-ripening protein 5[Elaeis guineensis]
MSTRG.36391	NAT-lncRNA		NW_011550907.1	2276076	2276368	-	LOC105050694	trans- regulatory target	not overlapped	NC_026000.1	36061376	36062528	-	XP_010929111.1	PREDICTED: Elaeis guineensis uncharacterized LOC105050694[Elaeis guineensis]
MSTRG.40949	NAT-lncRNA		NW_011550997.1	355681	356077	-	LOC105037015	trans- regulatory target	not overlapped	NW_011563492.1	1165	2413	+	XP_010911022.1	PREDICTED: Elaeis guineensis histone H1[Elaeis guineensis]
MSTRG.40949	NAT-lncRNA		NW_011550997.1	355681	356077	-	LOC105033080	trans- regulatory target	not overlapped	NW_011550997.1	219008	220213	+	XP_010906036.1	PREDICTED: Elaeis guineensis histone H1[Elaeis guineensis]
MSTRG.45845	lincRNA		NW_011551468.1	81368	81792	-	LOC105049174	trans- regulatory target	not overlapped	NC_025999.1	33136432	33136923	-	XP_010927045.1	PREDICTED: Elaeis guineensis uncharacterized LOC105049174[Elaeis guineensis]
NA represents no availble FPKM values for these genes, while low expression represents genes with low or no expression.
