# Supplementary material for: Genome-wide discovery and characterization of long noncoding RNAs in African oil palm (Elaeis guineensis Jacq.)
Source: PeerJ. 2020 Nov 2;8:e9585. doi: 10.7717/peerj.9585 (PMC7643553; doi:10.7717/peerj.9585)
Supplement: Supplemental Information 8 — Pearson correlation coefficients higher than 0.468 ( P values ≤0.05) were highlighted in red font. The p.c.c values of pairs of lncRNA loci/target as flagged as ”no available” when FPKMmax value for either lncRNA loci or targe genes is zero and flagged as ” 0 < FPKMmax < 1” when either lncRNA or target genes have FPKMmax lower than 1. FPKM max represents the highest FPKM value among the 18 transcriptomes. [file peerj-08-9585-s008.xlsx]

## Sheet: Table S7
Table S7 FPKM values of pairs of lncRNA loci/target genes in 18 oil plam transcriptomes and the pearson correlation coefficients between pairs of lncRNA and target gene. Pearson correlation coefficients higher than 0.468 (P values ≤0.05) were highlighted in red font. The p.c.c values of pairs of lncRNA loci/target as flagged as "no available" when FPKMmax value for either lncRNA loci or targe gen…
LncRNA	LncRNA class		target gene	Pearson correlation coefficients	Target genes	LncRNA loci	FPKM values for target genes																		Target genes		FPKM values for lncRNA loci																		LncRNA loci
					FPKMmax	FPKMmax	DRR053156	ERR1735779	DRR053157	SRR5189966	SRR5189969	SRR7812013	SRR7812014	ERR3385821	ERR3385822	ERR3385823	ERR3385824	ERR3385825	ERR3385826	ERR3385828	ERR1413765	ERR1413766	ERR1413767	ERR1413768	No. transcriptomes (FPKM ≥1)		DRR053156	ERR1735779	DRR053157	SRR5189966	SRR5189969	SRR7812013	SRR7812014	ERR3385821	ERR3385822	ERR3385823	ERR3385824	ERR3385825	ERR3385826	ERR3385828	ERR1413765	ERR1413766	ERR1413767	ERR1413768	No. transcriptomes (FPKM ≥1)
							Leaf	Leaf , oil palm seedlings	Male flower	Female inflorescences, +6 leaf stage	Female inflorescences, +15 leaf stage	Root, Juvenile tree (3 months)	Root, Juvenile tree (3 months)	mesocarp, five months	mesocarp, five months	mesocarp, four months	mesocarp, five months	mesocarp, four months	mesocarp, five months	mesocarp, five months	mesocarp, G1-M-100	mesocarp, G1-M-140	mesocarp, G1-M-120	mesocarp, G1-M-160			Leaf	Leaf , oil palm seedlings	Male flower	Female inflorescences, +6 leaf stage	Female inflorescences, +15 leaf stage	Root, Juvenile tree (3 months)	Root, Juvenile tree (3 months)	mesocarp, five months	mesocarp, five months	mesocarp, four months	mesocarp, five months	mesocarp, four months	mesocarp, five months	mesocarp, five months	mesocarp, G1-M-100	mesocarp, G1-M-140	mesocarp, G1-M-120	mesocarp, G1-M-160
MSTRG.105	NAT-lncRNA	II	LOC105044920	-0.243252	144.479	5.73424	27.7205	10.809	50.8668	42.0612	84.7208	61.4661	54.9425	84.4878	80.8139	144.479	132.276	93.9923	114.197	0	26.491	66.3634	43.8721	23.7812	17		0	4.30267	0	0	0	0	5.73424	0	0	0	0	0	0	0	0	0	0	0	2
MSTRG.591	NAT-lncRNA	II	LOC105038263	-0.11614	51.0841	2.07473	8.28118	34.1356	15.9215	1.21152	0	47.6848	33.742	11.8902	10.0663	9.98638	5.53518	3.91274	4.34926	0	11.7779	51.0841	15.9875	7.85749	16		0	0	0	0	0	0	0	0	0	0	0	0	0	0	0	0	0	2.07473	1
MSTRG.797	NAT-lncRNA	III	LOC105041822	0 < FPKMmax < 1	11.4634	0.400662	0.0328511	0.244334	1.00052	11.4634	5.24305	0.553228	0.946942	1.43052	0.867365	0.694594	0.301053	0.153363	0.954402	0.148506	0.54571	0.79789	0.654856	0	4		0	0	0	0.400662	0	0	0	0	0	0	0	0	0	0	0	0	0	0	0
MSTRG.892	NAT-lncRNA	III	LOC105041373	0.071767	8.21665	4.07479	4.16089	3.07511	1.62006	0	2.95483	3.5425	2.92095	6.88652	0	4.69008	0	0	0	4.4902	5.65424	8.21665	7.80905	0	12		0	2.84433	0	2.74565	0	4.07479	0	0	0	0	1.70648	0	0	0	0	0	3.66448	0	5
MSTRG.992	NAT-lncRNA	III	LOC105040708	-0.0938208	33.7683	8.73375	14.1929	2.29466	33.7683	4.00307	1.05711	1.00756	3.53757	19.8912	22.3796	10.7974	16.0664	6.46974	23.4895	0	2.14056	13.341	4.20578	9.62803	17		0	2.72442	0	0	0	0	0	0	0	0	0	0.716664	0	0	0	0	0	8.73375	2
MSTRG.1131	NAT-lncRNA	III	LOC105042742	0.241017	35.6945	4.06509	5.84756	8.89138	1.76252	8.34775	6.08888	9.0255	11.5487	21.4541	19.0743	17.0137	19.8197	16.8799	12.832	9.59778	8.35154	20.6423	35.6945	13.7235	18		0.0635365	1.38684	0.0382748	4.03397	1.19809	0.396677	0.833836	4.06509	0	1.01061	0	1.94807	2.29384	1.55395	0	1.09603	1.91449	0.951454	10
MSTRG.1185	NAT-lncRNA	III	LOC105042400	0 < FPKMmax < 1	67.1231	0.322506	36.0806	29.4493	24.5812	41.6441	26.9754	57.693	67.1231	61.8839	62.9967	51.1561	32.0322	30.895	61.4684	0.0463653	18.7453	37.6175	33.7093	13.0938	17		0	0	0	0.322506	0.167477	0.26391	0.157654	0.132418	0.100596	0.0278607	0.0772321	0.196884	0.114399	0.0463653	0	0	0.143896	0.176534	0
MSTRG.1355	NAT-lncRNA	III	LOC105043751	0 < FPKMmax < 1	10.9719	0.336206	0	2.08808	0	5.94825	2.67676	8.45768	10.0637	1.99854	7.09163	10.9719	0	3.24286	7.68067	7.97812	0	0	9.64685	0.572605	12		0	0.163372	0	0.336206	0.165612	0	0	0	0.0544745	0	0	0.215331	0.185412	0	0.252808	0.215997	0.2951	0	0
MSTRG.1474	NAT-lncRNA	III	LOC105048975	not available	70.1466	0	23.3194	24.5479	5.96553	0.336069	0.342026	16.4553	27.4063	45.0552	23.5115	10.552	43.4335	10.7697	70.1466	12.9994	1.87308	13.8085	23.6516	8.7886	16		0	0	0	0	0	0	0	0	0	0	0	0	0	0	0	0	0	0	0
MSTRG.1475	NAT-lncRNA	III	LOC105048975	-0.0225322	70.1466	2.03512	23.3194	24.5479	5.96553	0.336069	0.342026	16.4553	27.4063	45.0552	23.5115	10.552	43.4335	10.7697	70.1466	12.9994	1.87308	13.8085	23.6516	8.7886	16		0.572623	0.895006	2.03512	0	0	0.790865	0	0.944607	0	0	0	0	0	0	0	0	0.921603	0.396557	1
MSTRG.1743	NAT-lncRNA	II	LOC105047393	not available	116.73	0	30.1575	59.4231	24.6784	38.4683	50.7447	82.3664	116.73	41.04	38.3503	53.9292	14.3843	29.1599	36.6134	0	13.3696	14.9136	20.1476	5.48192	17		0	0	0	0	0	0	0	0	0	0	0	0	0	0	0	0	0	0	0
MSTRG.1798	NAT-lncRNA	III	LOC105046957	-0.15365	14.0364	3.05149	0.0760349	7.2965	2.51912	1.87551	3.69805	6.8338	3.38051	0	0	0	0	0	0	14.0364	0	2.56809	0	0.711913	8		0.0760349	0	0	0	0	0	0.456644	0	0	0	0	0	0	0	0	0	3.05149	0	1
MSTRG.1915	NAT-lncRNA	III	LOC105046044	not available	54.0361	0	3.67122	26.2657	0	20.6094	32.0715	21.4335	0	54.0361	42.0106	41.4558	24.0557	22.4504	34.0549	38.2021	12.0066	27.0832	26.3385	0	15		0	0	0	0	0	0	0	0	0	0	0	0	0	0	0	0	0	0	0
MSTRG.1977	NAT-lncRNA	II	LOC105045652	0.435189	3.05937	8.86723	3.05937	0	0	0	0	0	0.373403	0	0	0	0	0	0	2.62807	0.202428	0	0.359742	0.085469	2		3.05937	0	0	5.31118	2.76578	0.545084	0.718645	2.08662	2.79664	5.61904	2.68106	1.90729	5.99031	8.86723	0.717407	1.17457	1.27363	0.981472	12
MSTRG.2125	NAT-lncRNA	I	LOC109505916	0 < FPKMmax < 1	0.216369	0.710024	0	0.167943	0.00758918	0	0	0	0.0996422	0	0	0.0614858	0	0	0	0	0	0.0898246	0.216369	0	0		0	0	0	0	0	0	0.203882	0	0	0	0	0	0	0	0	0.314609	0.710024	0.133955	0
MSTRG.2125	NAT-lncRNA	II	LOC105049973	0 < FPKMmax < 1	4.17018	0.710024	4.17018	3.9808	0.720823	0.897174	0	0.654048	0	0.423662	0	0.447187	0.92973	0.832112	0.302341	0.806575	1.18498	0.759344	0.663523	0.0454371	3		0	0	0	0	0	0	0.203882	0	0	0	0	0	0	0	0	0.314609	0.710024	0.133955	0
MSTRG.2168	NAT-lncRNA	III	LOC105050084	0 < FPKMmax < 1	0.518026	8.67952	0	0.518026	0	0.043714	0.103644	0	0	0.136439	0.15679	0.152313	0.154166	0.197425	0.134399	0.363137	0.0628135	0.0660783	0	0.0113211	0		0	7.83919	0.524188	8.67952	3.26851	0.273686	0	0.277319	0.288811	0	0.368798	0.194225	0	0.363137	6.12089	4.73498	5.08469	2.86375	7
MSTRG.2280	NAT-lncRNA	II	LOC105052848	0.792617	8.49848	72.4936	0	0	0	8.49848	3.66472	0	0	0.457204	1.39525	2.28537	0.888245	0.81947	0.213113	0	1.79847	0	0.826923	0.903832	5		0	0	0	72.4936	0	0	0	0	0	0	0	0	0	0	0	0	22.4925	27.9572	3
MSTRG.3057	NAT-lncRNA	III	LOC105055781	0 < FPKMmax < 1	21.6815	0.910926	6.64926	15.7487	11.7608	4.24727	6.33845	11.0437	9.59324	13.9827	21.6815	0	15.3642	12.9859	18.7194	0.185116	5.55805	6.33182	14.604	7.52158	16		0	0.220409	0	0.910926	0.586748	0.026642	0.0298752	0.720243	0.24448	0.0416635	0.208293	0.147441	0	0.185116	0.534279	0.242484	0.623658	0.177714	0
MSTRG.3383	NAT-lncRNA	IV	LOC105058483	0 < FPKMmax < 1	0.973961	3.7831	0.774945	0	0.0654269	0	0.346454	0	0.973961	0	0	0.066308	0	0	0	0.312147	0.0873767	0	0	0	0		0.357124	0.329982	2.85707	0	1.11479	0	0	2.09117	3.7831	0.160437	2.11355	0.625054	2.52237	0.398569	0.173493	0.670603	0.547668	0	6
MSTRG.3444	NAT-lncRNA	III	LOC105058873	-0.100325	2.97515	4.75789	0.963445	0.049921	0.638407	2.97515	2.37814	0	0	0.379951	0.0660723	0.0731339	0.0824612	0.0872967	0.224742	0	0	0	0.184258	0	2		0.670502	0.942762	0	0	0	0	0	0	0	0	0	0	0	0	0.782913	0	4.75789	0	1
MSTRG.3599	NAT-lncRNA	IV	LOC105059614	0.0219353	3.92338	2.63324	0.147244	0.469816	3.92338	0	0.272284	2.96552	1.22114	0.153118	0.204739	0.204141	0.169645	0.160197	0.15136	0.176076	0	0	0	0.405742	3		0	0.319146	0.46592	0	0	0.579019	0	0.235616	0.366033	0	0.600724	0.520907	0.714582	0	0	0	2.63324	0.27404	1
MSTRG.3678	NAT-lncRNA	III	LOC105059937	0 < FPKMmax < 1	18.175	0.557499	18.175	8.61145	0	0	0	5.85736	8.06347	2.21375	1.85446	1.06253	1.52943	0.803259	1.27874	1.27553	1.21803	0.283806	0.848115	0.134555	11		0.27502	0	0	0	0	0	0.204506	0.100282	0.522708	0	0	0.557499	0	0	0	0	0.212798	0	0
MSTRG.3768	NAT-lncRNA	II	LOC105061149	not available	116.151	0	16.0605	15.0968	8.8943	2.38407	1.2964	48.9033	62.1356	45.7664	54.5024	116.151	41.1806	41.4183	36.186	0	9.67534	13.2433	7.86966	0.883953	16		0	0	0	0	0	0	0	0	0	0	0	0	0	0	0	0	0	0	0
MSTRG.3810	NAT-lncRNA	III	LOC105060976	0 < FPKMmax < 1	7.92201	0.411659	2.30043	4.16075	1.5745	4.36095	5.92496	7.92201	6.68283	1.9278	2.39451	1.80627	1.75924	1.50197	1.61605	0	1.3236	1.38617	0.656894	1.26083	16		0	0	0	0.411659	0	0	0	0	0.0873467	0	0	0	0	0	0	0	0	0	0
MSTRG.3934	NAT-lncRNA	I	LOC105032054	-0.181994	6.99964	1.27213	0	4.49888	0.124837	1.65352	3.95917	0	0	2.81855	2.50745	1.90982	0.281363	0.647283	1.48975	0.115044	4.14414	6.99964	0	0.54028	9		0	0	0	0	0	0	0	0	0	0	1.27213	0	0	0	0	0	0	0	1
MSTRG.4060	NAT-lncRNA	I	LOC105032700	-0.190028	23.7106	1.48328	15.1171	11.6521	23.7106	1.21201	0.837617	0.0492185	0.275887	22.7988	19.2486	22.1907	16.2428	20.5926	15.4131	0	6.26707	8.92754	5.98879	4.14751	14		0	0	0	0	0	0	0	0	0	0	0	0	0	0	0	0	0	1.48328	1
MSTRG.4063	NAT-lncRNA	III	LOC105032715	not available	0	1.00663	0	0	0	0	0	0	0	0	0	0	0	0	0	0	0	0	0	0	0		0	0	0	0	0.389084	0	0.122368	0	0.554714	0.819047	1.00663	0	0	0.273887	0	0.494701	0.319921	0	1
MSTRG.4389	NAT-lncRNA	III	LOC105034993	0 < FPKMmax < 1	56.3323	0.345152	20.8976	5.01499	3.37057	7.44067	4.92194	5.64556	0	29.982	29.2971	16.8993	24.7415	9.8163	25.2264	12.7489	8.92337	56.3323	15.5749	22.1422	17		0.0636249	0.076937	0	0.158853	0	0.150302	0	0	0	0.144728	0.128926	0.102621	0.178184	0.0965919	0	0	0.175629	0.345152	0
MSTRG.4403	NAT-lncRNA	III	LOC105034901	0 < FPKMmax < 1	117.943	0.924261	42.2065	32.0162	6.28889	5.19189	7.84061	18.2801	17.0853	28.328	44.4596	52.8157	37.7166	27.6416	44.4426	0.324714	27.0982	20.372	117.943	40.7487	17		0.108487	0.521648	0	0.47025	0.594975	0	0.515164	0	0	0.290932	0.570062	0.28778	0	0.324714	0	0.0848784	0.924261	0.64574	0
MSTRG.4499	NAT-lncRNA	III	LOC105036523	0 < FPKMmax < 1	0.0483983	9.09703	0	0	0.0483983	0	0	0.012416	0	0.0171114	0	0	0	0	0.0101661	0	0	0	0	0	0		0	0	0	0	0	0	0	0	0	0	0	0	0	0	9.09703	0	0	3.7842	2
MSTRG.4533	NAT-lncRNA	III	LOC105036063	0 < FPKMmax < 1	44.1341	0.58301	0	4.96521	31.4084	11.3286	8.88532	8.53326	11.541	32.6741	33.6101	44.1341	19.2785	30.5527	38.5834	17.4471	11.5151	9.71163	33.2165	9.42565	17		0	0	0	0	0.111167	0	0	0	0	0.0409523	0	0	0.419977	0	0.58301	0.42403	0.511874	0.179797	0
MSTRG.4544	NAT-lncRNA	II	LOC105037900	0.394619	4.86817	5.1959	4.86817	1.08781	0.219183	0	0	0.170871	0.287477	0	0	0	0.420253	0	0	0	0.78626	0	0	4.30269	3		3.72773	5.1959	1.15792	1.61875	0	0.53456	0.0639713	0	0.591767	0	0.331432	0.327248	0.413443	0.248973	0	0.674479	0.819684	0	4
MSTRG.4560	NAT-lncRNA	III	LOC105037891	0 < FPKMmax < 1	10.7581	0.454685	0	0	0	0.907751	0	0	0	0	0	0	0	0	0	10.7581	0	0	0	2.9234	2		0	0	0	0.304973	0	0	0.454685	0	0	0	0	0	0	0	0	0	0	0	0
MSTRG.4684	NAT-lncRNA	III	LOC105037249	0 < FPKMmax < 1	17.7507	0.202385	14.7577	15.2113	5.23584	6.91448	5.44938	13.9	17.7507	0	16.5838	0	10.9014	4.27155	7.5157	6.30112	14.2226	13.5241	13.713	6.53953	16		0	0	0	0	0	0	0	0.144331	0	0	0	0.202385	0	0	0	0	0	0	0
MSTRG.4762	NAT-lncRNA	III	LOC105036608	0 < FPKMmax < 1	146.895	0.630435	36.8684	42.5276	26.7983	38.7986	48.5337	40.3406	42.0793	146.895	89.4603	65.4278	26.1074	53.1033	59.3059	35.1631	23.2161	109.106	46.89	43.2849	18		0	0	0	0	0	0	0.0708056	0.021184	0.0221237	0	0	0.0867925	0.0502916	0	0.29167	0.123066	0.0369649	0.630435	0
MSTRG.4816	NAT-lncRNA	IV	LOC109505455	not available	0	0	0	0	0	0	0	0	0	0	0	0	0	0	0	0	0	0	0	0	0		0	0	0	0	0	0	0	0	0	0	0	0	0	0	0	0	0	0	0
MSTRG.4816	NAT-lncRNA	IV	LOC105038074	not available	0.230173	0	0	0	0	0	0	0.0969879	0.109728	0	0	0	0	0	0	0.174375	0.146977	0	0.230173	0.158281	0		0	0	0	0	0	0	0	0	0	0	0	0	0	0	0	0	0	0	0
MSTRG.4816	NAT-lncRNA	IV	LOC105038075	not available	0.710399	0	0	0.0296801	0	0.122644	0.0902967	0	0	0	0	0.358723	0.0498391	0.07937	0.0920315	0	0	0.710399	0	0.287543	0		0	0	0	0	0	0	0	0	0	0	0	0	0	0	0	0	0	0	0
MSTRG.4914	NAT-lncRNA	III	LOC105038026	0 < FPKMmax < 1	6.83626	0.235773	0.849481	1.32869	1.04248	2.37367	1.74113	4.75775	3.84416	2.69784	2.35815	1.55173	1.23216	0.922769	1.11422	0.927148	2.76336	5.18659	6.83626	1.95248	15		0	0	0	0	0	0	0.0808352	0.0456675	0	0	0	0	0.0541016	0	0	0.0931465	0	0.235773	0
MSTRG.5026	NAT-lncRNA	III	LOC105038107	not available	14.0579	0	0	0	0.913001	0.864081	0.800745	6.63208	5.56441	0	0	14.0579	2.98651	7.78749	0	8.18476	0	7.42541	6.21351	0	8		0	0	0	0	0	0	0	0	0	0	0	0	0	0	0	0	0	0	0
MSTRG.5165	NAT-lncRNA	III	LOC105038176	0 < FPKMmax < 1	81.2737	0.348001	26.7166	17.5441	5.49203	39.9666	76.7864	15.9512	25.706	28.0399	38.9531	50.0698	81.2737	58.2646	56.8735	0.157235	10.4222	17.4579	19.5322	7.09944	17		0	0.0881811	0.00728624	0.253429	0.0496881	0	0.0521567	0.251613	0	0	0	0.193211	0	0.157235	0.2943	0.109118	0.348001	0.234458	0
MSTRG.5276	NAT-lncRNA	III	LOC105038239	0 < FPKMmax < 1	5.04149	0.789297	0.0178627	0.602859	0.122577	0.671365	0.270012	0	0	0	0	0	0	0	0	0	0	5.04149	0	3.7631	2		0.0178627	0.108401	0	0.789297	0.131924	0.0208523	0.0467318	0.227266	0.415422	0.0164356	0	0.154948	0.0843503	0.0547274	0.451005	0.542293	0.292548	0.104508	0
MSTRG.5289	NAT-lncRNA	III	LOC105038248	0 < FPKMmax < 1	60.988	0.336055	56.9796	19.9501	2.67864	32.2529	33.1462	8.18666	8.88187	37.9876	18.5528	33.8429	39.205	32.1671	37.2087	0	33.3025	25.7259	60.988	14.7984	17		0	0.106246	0	0	0	0	0.125503	0.336055	0.0701209	0	0.0876201	0.0927342	0.0794863	0.174124	0.334351	0.143766	0.263377	0	0
MSTRG.5557	NAT-lncRNA	IV	LOC105038466	0.235422	205.018	2.57271	3.3599	15.5002	47.6059	0	1.05371	90.132	102.368	25.5712	22.9579	32.7024	20.806	18.0635	21.3979	0	83.4943	126.819	205.018	17.944	16		0	2.57271	1.01944	0	0	1.43101	0	0	0.943991	0	0	0.791686	0	0	0.73427	1.09696	0.734957	0.616091	4
MSTRG.5603	NAT-lncRNA	III	LOC105038500	0 < FPKMmax < 1	14.407	0.786778	2.75372	12.2424	0.348577	14.407	9.68499	0	0	0	0	9.9502	0	0	0	10.5697	0	0	0	0	6		0	0.25068	0	0.385627	0	0	0	0.786778	0.57444	0	0.20582	0.544166	0.464807	0.102105	0.598727	0.172485	0.158675	0.214548	0
MSTRG.6148	NAT-lncRNA	III	LOC105038883	0 < FPKMmax < 1	32.9875	0.615841	30.9133	22.2496	9.77635	29.9164	32.9875	15.0471	17.0495	18.9622	18.4822	14.4357	11.7513	12.1239	13.644	0.0250765	11.3968	19.12	25.5781	9.84764	17		0.0122324	0.0297375	0	0.0615105	0	0	0.0636505	0.0586178	0.0204112	0.113064	0.0125277	0.0665435	0.0232148	0.0250765	0.615841	0.0369651	0.149355	0.214136	0
MSTRG.6481	NAT-lncRNA	III	LOC105039122	not available	86.8173	0	27.4766	20.3225	86.8173	36.61	51.5565	48.3201	58.7241	43.6541	57.1511	39.2887	43.7791	24.5867	51.4446	0	23.6098	37.0089	54.2292	28.7763	17		0	0	0	0	0	0	0	0	0	0	0	0	0	0	0	0	0	0	0
MSTRG.6593	NAT-lncRNA	III	LOC105039183	0 < FPKMmax < 1	1.51818	0.509747	0.282546	0.169285	0.59493	0	1.51818	0	0	0	0	0	0.722635	0	0.302053	0	0	0.580553	0.375173	0	1		0.122861	0	0	0	0	0	0.245492	0.201045	0.268403	0	0.215765	0	0.272441	0.123109	0.256975	0	0	0.509747	0
MSTRG.6695	NAT-lncRNA	III	LOC105039238	not available	1.24458	0	0.128431	0.372907	0.0391968	0	0	1.24458	0.70665	0	0	0	0	0	0	0	0.178817	0	0	0	1		0	0	0	0	0	0	0	0	0	0	0	0	0	0	0	0	0	0	0
MSTRG.7354	NAT-lncRNA	III	LOC105039697	-0.0372527	11.4158	1.21001	7.70965	0	4.08046	0	0	0.462564	1.56996	5.96083	0	5.94446	11.4158	8.65692	9.71447	0	1.90664	0	8.54753	2.32291	11		0	0	0	1.21001	0.238621	0	0	1.07755	0.603393	0.276584	0.155752	0.329846	0.283356	0	0.440931	0.251982	0.460345	0.633125	2
MSTRG.7396	NAT-lncRNA	IV	LOC105039758	not available	22.0369	0	0	1.81461	0.0126901	0	0	0.29788	0	22.0369	0	0	6.84895	0	0	0	0	0	19.5004	0	4		0	0	0	0	0	0	0	0	0	0	0	0	0	0	0	0	0	0	0
MSTRG.7396	NAT-lncRNA	IV	LOC105039825	not available	0.053153	0	0	0	0	0	0	0	0	0	0	0	0	0	0	0.053153	0	0	0	0	0		0	0	0	0	0	0	0	0	0	0	0	0	0	0	0	0	0	0	0
MSTRG.7861	NAT-lncRNA	III	LOC105040096	not available	33.9755	0	11.0835	9.91926	2.92735	25.1772	21.1007	14.913	13.5425	31.3532	25.4156	26.1518	22.0512	19.9337	33.9755	4.242	7.99278	6.95561	23.591	2.8071	18		0	0	0	0	0	0	0	0	0	0	0	0	0	0	0	0	0	0	0
MSTRG.7968	NAT-lncRNA	II	LOC105040167	-0.0267376	29.0184	9.48203	14.373	9.19849	7.37975	4.6018	9.03863	5.49237	7.01144	4.95639	8.47202	9.79005	7.68889	7.62963	4.02902	10.4825	11.9413	29.0184	9.0869	13.447	18		0	9.48203	0	0	2.59876	0	0	0	0	0	0	0	0	0	0	0	0	0	2
MSTRG.8018	NAT-lncRNA	III	LOC105040198	not available	61.986	0	13.3338	26.477	14.9231	59.2513	37.5026	17.8553	42.0426	61.986	29.5638	48.4628	27.6429	35.5082	37.1073	58.0256	44.8809	45.9657	54.1932	27.0639	18		0	0	0	0	0	0	0	0	0	0	0	0	0	0	0	0	0	0	0
MSTRG.8109	NAT-lncRNA	III	LOC105040272	0 < FPKMmax < 1	11.5883	0.457635	7.22525	3.6099	4.27632	4.99338	3.7556	5.18917	6.99129	0	11.2686	10.6303	10.8649	6.43199	11.5883	0	2.43946	8.58471	8.91753	0	15		0	0	0	0	0	0	0	0	0	0	0.0774722	0	0	0	0	0	0.457635	0.314786	0
MSTRG.8324	NAT-lncRNA	III	LOC105040426	not available	0	0	0	0	0	0	0	0	0	0	0	0	0	0	0	0	0	0	0	0	0		0	0	0	0	0	0	0	0	0	0	0	0	0	0	0	0	0	0	0
MSTRG.8627	NAT-lncRNA	II	LOC105040621	-0.0982793	13.3828	10.216	0	0	13.3828	0	0	2.67714	0	3.66712	1.8861	0	0	0	0	0	0	1.18152	0	0	5		0	0	0	0	0	0	0	0	0	0	0	0	0	10.216	0	0	0	0	1
MSTRG.8818	NAT-lncRNA	III	LOC105041500	-0.223143	13.0926	13.5268	0.475527	0.0757548	0	0	0.115252	0	0	0	11.0444	0	0	6.2163	13.0926	0	0	0	0	0.83976	3		0	1.85699	0	4.17516	1.9238	0.477072	0.716229	0	0	0	0	2.10126	0	0	4.97132	13.5268	6.72499	2.06932	8
MSTRG.9232	NAT-lncRNA	II	LOC105041048	-0.308066	3.05878	5.56593	1.76708	0	0	0	0	1.89342	3.05878	0	0	0	0	0	0	0	0	0	0.528998	0	3		1.76708	0	3.8369	4.63085	5.56593	0.97597	0	1.72506	1.13823	0.415769	0	3.06447	1.57096	1.7153	0.836486	2.95099	2.78932	1.5732	12
MSTRG.9422	NAT-lncRNA	III	LOC105041176	0.165956	12.2214	1.0686	5.05587	12.2158	2.43476	8.8908	12.2214	10.1129	11.6972	6.93542	8.76974	5.20284	5.37306	6.74141	6.12364	0.199813	7.43342	9.92514	10.1647	3.49691	17		0.00570913	0.132081	0.00516775	0.685711	0.331394	0.118756	0.0959346	0.460332	0.517108	0.235013	0.217121	0.347177	0.305841	0.199813	1.0686	0.329608	0.636961	0.398552	1
MSTRG.9486	NAT-lncRNA	III	LOC105041219	0 < FPKMmax < 1	18.9579	0.255757	10.1308	8.96471	3.30796	4.76709	4.62076	6.28594	9.74087	12.0804	12.3307	11.7883	8.37617	7.91596	12.1494	0	8.83526	18.9579	10.3349	6.8779	17		0	0.0529026	0	0.245991	0.0804754	0.0511053	0	0	0.018064	0.0200099	0.0889022	0.0471993	0.0616086	0.0222235	0	0.199348	0	0.255757	0
MSTRG.9637	NAT-lncRNA	III	LOC105041327	0 < FPKMmax < 1	10.5057	0.644763	7.05871	6.29802	0.981417	9.30293	10.5057	5.72241	8.10366	4.68352	4.45515	4.90189	3.48354	3.40891	4.69691	0.0221857	6.44443	6.57584	8.56691	5.47755	16		0	0	0.00650813	0.0271695	0.0177552	0.0332814	0	0.0518937	0.0240952	0.0266959	0.0295413	0.0941731	0.0753809	0.0221857	0.644763	0.119029	0.106743	0.265133	0
MSTRG.9962	NAT-lncRNA	I	LOC105041672	not available	0.54588	0	0.344041	0	0.407553	0	0	0	0	0	0	0	0	0	0	0	0	0	0.54588	0	0		0	0	0	0	0	0	0	0	0	0	0	0	0	0	0	0	0	0	0
MSTRG.9962	NAT-lncRNA	I	LOC105041670	not available	0	0	0	0	0	0	0	0	0	0	0	0	0	0	0	0	0	0	0	0	0		0	0	0	0	0	0	0	0	0	0	0	0	0	0	0	0	0	0	0
MSTRG.9962	NAT-lncRNA	IV	LOC105041674	not available	3.76931	0	0.0287602	0.0812135	0.440898	0.51517	1.88779	1.3274	3.76931	0.0491359	0.0236833	0.157393	0	0.0619631	0.0807483	0	0.269555	0	0.25152	0	3		0	0	0	0	0	0	0	0	0	0	0	0	0	0	0	0	0	0	0
MSTRG.9962	NAT-lncRNA	IV	LOC109505633	not available	2.69981	0	0	0	0	0	0	0	0	0	0	0	0	0	0	2.69981	0	0	0	0	1		0	0	0	0	0	0	0	0	0	0	0	0	0	0	0	0	0	0	0
MSTRG.9962	NAT-lncRNA	II	LOC105041676	not available	39.3084	0	0	0	0	0	0	0	0	0	0	0	0	0	0	39.3084	0	0	0	0	1		0	0	0	0	0	0	0	0	0	0	0	0	0	0	0	0	0	0	0
MSTRG.10064	NAT-lncRNA	II	LOC105041743	-0.317491	46.5788	1.71787	6.44032	0.981824	0.613881	46.5788	38.058	4.53874	4.90125	13.5879	2.24793	14.8164	1.20992	1.97005	4.17924	0.731207	2.16126	0.505546	1.66001	0.524452	13		1.29678	0.355475	0.476888	0	0	0.877084	1.36468	0	1.71787	0.918918	0	0.809698	0.962611	0.731207	0.330024	0	0.219654	0.181	3
MSTRG.10328	NAT-lncRNA	III	LOC105041936	-0.612759	116.231	1.98471	71.8463	25.7236	63.0545	42.1708	57.0794	108.755	116.231	47.6328	54.2217	59.0533	24.0519	47.0124	57.5419	6.12059	8.20617	10.4332	13.1006	8.52186	18		0	0.995437	0.0102867	1.34418	0.504801	0	0	1.83282	0	0.578491	0	0	0	0.641432	1.25163	1.46149	1.98471	1.21181	6
MSTRG.10334	NAT-lncRNA	II	LOC105041940	not available	0.0393513	0	0	0	0	0	0.0393513	0	0	0	0	0	0	0	0	0	0	0	0	0	0		0	0	0	0	0	0	0	0	0	0	0	0	0	0	0	0	0	0	0
MSTRG.10380	NAT-lncRNA	II	LOC105041973	0 < FPKMmax < 1	6.09103	0.811472	1.4685	3.11488	0.414591	6.09103	4.66548	0.768701	0.582709	2.80639	0	3.80572	2.9668	2.85243	3.45348	0	1.68849	4.86363	3.36905	0	12		0	0	0	0	0	0	0	0	0	0	0	0	0	0	0.466772	0.811472	0	0	0
MSTRG.10593	NAT-lncRNA	II	LOC109505593	-0.080309	114.663	1.1279	13.84	114.663	3.91743	1.0488	1.49574	56.3748	52.6017	4.29631	8.51556	7.27496	4.39297	6.52701	6.01037	0	12.9218	2.93804	4.39824	4.05424	17		0	0	0	0.0860904	0.0422099	0	0	0	0	0	0	0	0	0	1.1279	0.120602	0.185595	0	1
MSTRG.10670	NAT-lncRNA	III	LOC105042163	0 < FPKMmax < 1	37.7563	0.179478	14.6312	16.4537	4.93729	7.6939	6.56537	13.697	18.6782	21.3935	20.7775	18.0872	8.21036	11.5034	17.23	0.0616431	23.045	37.7563	9.07516	22.1094	17		0	0.0417129	0.00775561	0.0431551	0.0105769	0	0.0888768	0	0.150604	0.0317823	0	0.121493	0.179478	0.0616431	0	0	0	0	0
MSTRG.10671	NAT-lncRNA	III	LOC105042163	0 < FPKMmax < 1	37.7563	0.538287	14.6312	16.4537	4.93729	7.6939	6.56537	13.697	18.6782	21.3935	20.7775	18.0872	8.21036	11.5034	17.23	0.0616431	23.045	37.7563	9.07516	22.1094	17		0	0.028211	0	0	0	0	0.0306118	0	0.154008	0.127946	0	0.176102	0.131305	0.0473775	0	0	0	0.538287	0
MSTRG.10803	NAT-lncRNA	III	LOC105042208	0 < FPKMmax < 1	72.1174	0.4661	66.2554	20.3102	72.1174	19.9977	25.3722	41.1054	42.9637	24.3535	26.0746	21.1255	13.7552	15.0125	19.4446	0	5.82596	21.2286	17.1131	6.36625	17		0	0.114016	0	0	0.115552	0	0.135881	0.215697	0.0750039	0.0830083	0.0938589	0.0993063	0	0	0.180297	0.4661	0.285133	0	0
MSTRG.10818	NAT-lncRNA	III	LOC105042205	-0.0798749	14.4968	1.58443	0.123143	0.0891152	0.0180225	14.4968	6.59723	0.0697793	0.208369	0.191364	0	0.0416698	0	0	0.289685	0.0136571	0.0119507	0.0298407	0	0	2		0.109858	1.58443	0	0	0.133863	0	0.596618	0	0	0	0	0	0.100626	0	0	0	0	0	1
MSTRG.10941	NAT-lncRNA	III	LOC105042335	0 < FPKMmax < 1	21.2525	0.37796	0	4.79812	7.00447	11.69	21.2525	4.01154	3.83094	0	0	0.259954	0	0	0	0	0	0	0	0	6		0	0.37796	0	0.357865	0.0958219	0	0	0	0	0	0	0	0	0	0	0	0	0	0
MSTRG.10957	NAT-lncRNA	II	LOC105042328	not available	66.4642	0	3.0099	8.46069	0.156876	5.48473	3.40421	44.0483	66.4642	3.4838	6.03236	11.1898	2.06235	9.52211	2.9834	0	9.02431	14.3763	5.30704	1.788	16		0	0	0	0	0	0	0	0	0	0	0	0	0	0	0	0	0	0	0
MSTRG.11019	NAT-lncRNA	III	LOC105042309	0 < FPKMmax < 1	15.1405	0.268079	0	4.37139	0.274305	10.4356	0	0	0	12.6695	15.1405	10.908	11.4349	10.3807	13.1657	0	6.95364	6.51004	10.6874	3.73555	12		0	0.0471602	0	0.268079	0.0239139	0.0227192	0.0254638	0.0771829	0.0322468	0.0714432	0.0594795	0.0421097	0.036664	0.0198292	0.17541	0	0.0265712	0.0379328	0
MSTRG.11156	NAT-lncRNA	II	LOC105042388	0 < FPKMmax < 1	0.196469	2.06746	0.110839	0.132536	0.00899823	0	0	0	0	0	0	0.179591	0	0.0648416	0.0475342	0	0.196469	0.0449978	0	0	0		0.110839	2.06746	0	0	1.18967	0	0.376403	0	0	0.401107	0	0.881443	0	0	1.01996	0.434024	0	0	3
MSTRG.11163	NAT-lncRNA	III	LOC105042392	-0.0541373	4.67743	7.77911	1.09011	0.127224	0.225442	4.67743	3.58136	0	0.0934173	1.34963	0	0.732645	0.442709	0.185275	0.492133	0.972145	0.383352	0.21619	0.287603	0.138024	4		0.984811	1.83278	0	1.66437	1.83409	0	0	3.90652	2.93788	0	0.787531	0.930777	3.19155	0	7.10152	1.76302	1.77502	7.77911	10
MSTRG.11331	NAT-lncRNA	IV	LOC105042487	0 < FPKMmax < 1	0.0108749	5.50228	0	0	0.0108749	0	0	0	0	0	0	0	0	0	0	0	0	0	0	0	0		0	0	0	4.9931	5.50228	0	0	0.79725	1.00727	0	1.1097	0	1.0213	0	0	0	0	0	5
MSTRG.11331	NAT-lncRNA	IV	LOC105042488	0.412164	1.18829	5.50228	0	0	0.0447642	1.00865	0.351889	0.0282545	0	0	0	0.247664	0	0	0	0	1.18829	0	0	0.514253	2		0	0	0	4.9931	5.50228	0	0	0.79725	1.00727	0	1.1097	0	1.0213	0	0	0	0	0	5
MSTRG.11331	NAT-lncRNA	IV	LOC105042480	-0.148551	4.47376	5.50228	0	0.149304	0.137644	0.674615	0	0	1.5748	1.82152	0	0	0	0	0	0	0	4.47376	1.99103	1.45178	5		0	0	0	4.9931	5.50228	0	0	0.79725	1.00727	0	1.1097	0	1.0213	0	0	0	0	0	5
MSTRG.11378	NAT-lncRNA	II	LOC105042510	-0.24134	78.6372	1.4445	0	25.4362	8.72827	30.9002	45.4608	0	0	53.2452	78.6372	0	60.5319	0	59.347	67.1394	0	34.3526	0	18.6099	11		0	0	0	0	0	0	0	0	0	0	0	0	0	0	1.4445	0	0	0	1
MSTRG.11378	NAT-lncRNA	I	LOC105042511	0.0976217	7.16358	1.4445	1.00996	0	0.725166	0	0	0	0	0	0	0	1.71864	0	0	7.16358	1.66806	0	3.32549	1.65404	6		0	0	0	0	0	0	0	0	0	0	0	0	0	0	1.4445	0	0	0	1
MSTRG.11517	NAT-lncRNA	III	LOC105042588	0 < FPKMmax < 1	22.1143	0.53853	7.61068	5.84907	2.55135	22.1143	17.1484	8.94169	2.76282	8.83779	8.60511	11.5987	1.86699	4.68144	9.46093	10.1843	7.18	15.9642	12.1799	5.0391	18		0	0.101553	0	0.209482	0.51485	0.100341	0.056426	0	0.171564	0.151997	0.127263	0.224991	0.389734	0	0.53853	0.391283	0	0.083059	0
MSTRG.11590	NAT-lncRNA	III	LOC105042658	0 < FPKMmax < 1	16.1455	0.121916	2.34796	16.1455	0.606204	4.3349	3.35506	0.522338	0.174972	0.719269	0	1.32132	2.0649	0.842749	1.2097	1.99103	0.800054	2.46256	0.393462	0.11965	9		0.0113064	0.0962265	0	0.0710915	0.0697113	0	0	0	0	0	0	0	0	0	0.121916	0	0	0	0
MSTRG.11940	NAT-lncRNA	III	LOC105042830	0 < FPKMmax < 1	17.0794	0.455423	0.0190129	7.59653	0.980763	17.0794	14.4193	4.68147	5.18485	10.9215	10.326	12.1245	8.65201	10.7301	10.0606	11.6589	1.30488	3.9885	3.12949	1.1091	16		0.0190129	0.0462938	0	0.0638724	0.0313031	0	0.0655759	0.16272	0.111562	0	0.0260474	0.145318	0.120877	0	0.455423	0.181067	0.128167	0.224299	0
MSTRG.12021	NAT-lncRNA	III	LOC105042882	0.247511	40.9705	6.08438	7.99451	7.03609	3.30786	15.9892	10.6158	10.8606	12.939	24.9701	40.9705	28.3783	19.0569	13.4812	22.4918	0	21.3518	24.6704	31.9371	12.9932	17		0.0727698	0.522313	0	3.76053	0.573575	0.267125	0	1.55408	1.04258	0.534331	0.685065	0.992942	0.82127	0.932877	6.08438	2.02448	1.68796	2.58562	7
MSTRG.12022	NAT-lncRNA	III	LOC105042882	not available	40.9705	0	7.99451	7.03609	3.30786	15.9892	10.6158	10.8606	12.939	24.9701	40.9705	28.3783	19.0569	13.4812	22.4918	0	21.3518	24.6704	31.9371	12.9932	17		0	0	0	0	0	0	0	0	0	0	0	0	0	0	0	0	0	0	0
MSTRG.12138	NAT-lncRNA	III	LOC109505726	0 < FPKMmax < 1	0.267381	0.84808	0	0	0.201689	0	0	0	0	0.0835541	0	0	0	0	0	0.267381	0	0	0	0	0		0	0	0.124266	0	0	0	0	0	0	0.357205	0	0.26657	0	0.145434	0.586178	0	0	0.84808	0
MSTRG.12377	NAT-lncRNA	III	LOC105043129	0.625876	11.0115	1.34106	4.31378	0.950532	1.27442	7.86031	8.0994	2.56145	4.19368	7.25753	4.3474	2.09548	1.31104	0.94616	1.75064	0.120527	0.876596	11.0115	6.3305	5.67901	14		0.0399021	0.0481477	0.0359807	1.34106	0.634664	0	0	0.530341	0.162866	0.0360737	0.0402494	0.0426995	0	0.120527	0	0.24675	0.16731	0.235892	1
MSTRG.12387	NAT-lncRNA	III	LOC105043124	0 < FPKMmax < 1	12.4735	0.366103	1.03718	0	0.0534146	12.4735	1.63986	1.21856	0.200936	2.69424	2.28045	1.4687	1.90761	1.19047	3.92229	1.62077	0.793101	2.20272	3.4004	1.20181	14		0	0	0	0	0.366103	0	0	0	0	0	0.120074	0.0636288	0	0	0.111039	0.0946378	0	0.119733	0
MSTRG.12756	NAT-lncRNA	III	LOC105043404	-0.0949108	31.7428	1.90473	0	0	0	0	0	0	0	0	0	0	0	0	0	31.7428	0	0	0	0	1		0	0	0	0	0	0	0	0	0	0	0	0	0	0	0	1.55954	1.90473	0.389046	2
MSTRG.12826	NAT-lncRNA	III	LOC105043458	0 < FPKMmax < 1	19.1706	0.983418	0	0	6.72414	19.1706	0	0	3.30048	0	0	0	0	0	0	2.93541	4.56465	4.18504	4.41348	0	7		0	0	0	0	0	0	0	0	0	0	0	0	0.78182	0	0	0.983418	0	0	0
MSTRG.12869	NAT-lncRNA	II	LOC105043487	not available	290.947	0	124.545	190.168	35.9928	11.3157	17.6034	290.947	223.041	35.1069	23.051	11.6144	21.631	30.6354	21.9172	0.260515	65.5272	235.075	127.154	26.2001	17		0	0	0	0	0	0	0	0	0	0	0	0	0	0	0	0	0	0	0
MSTRG.13094	NAT-lncRNA	III	LOC105043674	-0.0490832	113.956	2.40374	15.1879	61.296	113.956	0.335002	10.5412	0.590388	0.483122	3.25472	8.00186	10.3179	17.674	7.86242	7.63524	0.423834	9.94967	6.20879	11.0515	1.33139	14		0	0.260537	0	0	0	0	0	0.163218	0.170228	0.0941832	0.320502	0.112961	0	0.423834	0.416035	0	2.40374	0	1
MSTRG.13469	NAT-lncRNA	III	LOC105043970	-0.203613	51.6636	2.22457	24.9144	40.5319	7.61808	12.4179	16.7077	48.8486	51.6636	49.528	50.0004	42.6155	36.3083	25.4659	29.2515	0	7.47053	34.8065	28.894	13.1602	17		0	0.128348	0	0	0.585753	0.308538	0.368765	0	0.512427	0.0162188	0.345207	0.382243	0.382896	0	2.22457	0.508185	0.625213	0.378027	1
MSTRG.13818	NAT-lncRNA	I	LOC105044226	-0.164441	53.9011	3.42297	17.4109	0	1.38588	0	0	53.9011	0	0	15.1346	0.8231	0	0.377617	0	0	4.27073	1.83362	4.50573	0	7		0	0	0	3.42297	0.230187	0	0	0	0	0.12709	0	0.251078	0	0	1.55418	0.806307	0.26557	0.745498	2
MSTRG.13818	NAT-lncRNA	II	LOC105044265	-0.355618	22.6706	3.42297	8.76074	0	0	2.79316	0.99956	18.8729	17.3708	22.6706	11.4169	4.18669	9.20217	2.23085	14.5561	8.53377	1.16192	5.20587	5.93219	0.510956	14		0	0	0	3.42297	0.230187	0	0	0	0	0.12709	0	0.251078	0	0	1.55418	0.806307	0.26557	0.745498	2
MSTRG.13825	NAT-lncRNA	III	LOC105044229	0 < FPKMmax < 1	11.282	0.818785	0.429228	2.32516	0	2.29379	0.642973	8.47959	11.282	0	0	0.885213	0	0.153271	0	0.564923	0.458558	0.132834	0	0	4		0.429228	0.818785	0	0	0	0	0	0	0.202978	0	0	0.0894269	0	0.0839693	0	0	0	0	0
MSTRG.13832	NAT-lncRNA	I	LOC105044235	-0.0353505	11.4104	2.1638	0.0608503	0.0646492	0.43573	0	0	0.858541	0.926384	0	1.59851	0.614092	1.74751	0.17122	1.45932	0	2.21273	3.17342	1.80457	11.4104	7		0	0	0	0.347004	0.455016	0	0	0.57963	0.219778	0.125647	0.234035	0.59568	0.601299	0	1.59073	0	2.1638	0	2
MSTRG.13880	NAT-lncRNA	III	LOC105044289	not available	0	5.14657	0	0	0	0	0	0	0	0	0	0	0	0	0	0	0	0	0	0	0		0	0.340008	0	5.14657	0	1.36892	0	0.389998	0	0	0	0	0	0	0	0	0	0	2
MSTRG.14235	NAT-lncRNA	III	LOC105044672	0 < FPKMmax < 1	3.93107	0.26578	1.90274	3.60711	0.664843	3.93107	2.13847	1.30373	1.49292	1.62323	1.87619	2.97008	1.58249	2.29608	1.34752	0.619131	1.61615	0	1.65173	0.842983	14		0	0	0	0	0.26578	0	0	0	0	0	0	0	0	0	0	0	0	0	0
MSTRG.14426	NAT-lncRNA	III	LOC105044733	0 < FPKMmax < 1	14.8233	0.674041	0	6.00109	0.172272	12.3092	14.8233	0.150302	0.337549	0.250261	0.052268	8.58269	0.838017	0.718348	0.148486	0	0.173411	0.0488501	0.0881473	0	4		0	0	0	0.674041	0	0	0	0	0	0	0	0	0	0	0	0	0	0	0
MSTRG.14615	NAT-lncRNA	IV	LOC105044864	0 < FPKMmax < 1	0.920646	0.817943	0.211287	0.0927119	0.00900752	0.240715	0	0.0233312	0.039228	0.136199	0	0.0464121	0.0305008	0.0436054	0	0.920646	0.309229	0.264636	0.0551044	0	0		0.211287	0.507071	0.476557	0.527026	0.308844	0.409558	0.456724	0	0	0.578789	0	0	0	0.817943	0	0	0.342772	0.207718	0
MSTRG.14713	NAT-lncRNA	IV	LOC105044933	0 < FPKMmax < 1	0.126524	0.382908	0	0	0	0	0	0	0	0	0	0	0	0	0.126524	0	0	0	0	0	0		0	0	0	0.214352	0	0	0	0.250425	0.382908	0	0.0551059	0	0.180838	0	0	0	0	0.281386	0
MSTRG.15025	NAT-lncRNA	III	LOC105045190	not available	147.334	0	139.221	0.686788	147.334	3.65921	4.73222	26.2916	15.4738	59.033	4.92142	2.57424	1.12461	2.85306	2.7357	0	25.8321	93.7292	17.2553	57.4878	16		0	0	0	0	0	0	0	0	0	0	0	0	0	0	0	0	0	0	0
MSTRG.15153	NAT-lncRNA	III	LOC105045252	0 < FPKMmax < 1	7.46354	0.797809	0	0.520893	0.68003	4.01782	1.57124	3.13745	3.25818	7.46354	5.19789	4.80589	3.92942	4.16114	5.06627	4.08255	2.30469	4.08942	3.02032	6.14925	15		0	0	0	0.152459	0	0.0747886	0	0	0	0	0	0	0	0	0.797809	0	0.0883626	0	0
MSTRG.15557	NAT-lncRNA	III	LOC105045462	0 < FPKMmax < 1	148.6	0.613987	52.0236	41.3867	48.8922	94.9915	128.174	52.4842	44.4691	43.4463	36.9702	46.1751	67.8137	51.5137	63.7222	0	62.1337	45.4606	148.6	27.0434	17		0	0.058191	0.0870839	0	0.117483	0.0578988	0	0	0.117076	0.108005	0.484778	0.153699	0.155123	0	0	0	0.613987	0.0956262	0
MSTRG.15963	NAT-lncRNA	III	LOC105046043	-0.198824	81.5475	1.9388	22.6186	81.5475	9.57053	6.35217	7.84422	5.42724	8.00154	13.3108	13.1554	12.3147	14.5472	14.6749	19.9706	7.33679	4.25215	7.03866	9.15014	4.29532	18		0	0	0	1.9388	0	0	0	0	0	0.425817	0	0	0	0.402072	0.563749	0	0.159503	0.136311	1
MSTRG.15968	NAT-lncRNA	III	LOC105046041	0 < FPKMmax < 1	109.249	0.845458	46.9222	16.0284	109.249	14.0357	27.9882	31.3336	38.4181	45.3463	94.5358	73.787	51.4698	59.3465	50.1515	0	28.4553	34.7968	68.8191	24.7425	17		0	0	0.0998251	0	0	0	0.160928	0.082765	0.34527	0	0.108384	0.229181	0.097758	0	0.845458	0	0	0	0
MSTRG.16123	NAT-lncRNA	III	LOC105045939	0 < FPKMmax < 1	21.9218	0.20025	4.20649	5.47988	5.65522	9.63858	21.9218	11.5284	11.6263	10.0769	3.49257	15.4078	9.38565	12.7431	5.59784	0	8.07991	4.24999	7.26963	0.881691	16		0	0.130353	0	0	0	0	0.143731	0.0564172	0	0	0	0	0	0	0.131018	0	0.20025	0	0
MSTRG.16341	NAT-lncRNA	I	LOC105045804	0.123411	3.28788	8.06881	1.14094	3.28788	0.409408	2.77584	2.0157	2.62214	2.36864	1.8567	1.83807	1.6033	1.11177	1.45471	1.65393	0	3.12497	1.5198	1.22374	1.93591	16		0	0	0	0	0	0	0	0	0	5.29957	0	0	0	2.2942	8.06881	5.59499	0	0	4
MSTRG.16341	NAT-lncRNA	I	LOC105045801	0 < FPKMmax < 1	0.46047	8.06881	0.104757	0.46047	0	0	0	0	0	0	0	0	0	0	0	0	0	0	0	0	0		0	0	0	0	0	0	0	0	0	5.29957	0	0	0	2.2942	8.06881	5.59499	0	0	4
MSTRG.16341	NAT-lncRNA	IV	LOC105045802	-0.0800245	12.2241	8.06881	0.712727	0	0.900325	12.2241	0	0	0	0	0	0	3.96082	0	0	0.829483	0	2.29582	0	0	3		0	0	0	0	0	0	0	0	0	5.29957	0	0	0	2.2942	8.06881	5.59499	0	0	4
MSTRG.16342	NAT-lncRNA	III	LOC105045804	not available	3.28788	0	1.14094	3.28788	0.409408	2.77584	2.0157	2.62214	2.36864	1.8567	1.83807	1.6033	1.11177	1.45471	1.65393	0	3.12497	1.5198	1.22374	1.93591	16		0	0	0	0	0	0	0	0	0	0	0	0	0	0	0	0	0	0	0
MSTRG.16342	NAT-lncRNA	I	LOC105045801	not available	0.46047	0	0.104757	0.46047	0	0	0	0	0	0	0	0	0	0	0	0	0	0	0	0	0		0	0	0	0	0	0	0	0	0	0	0	0	0	0	0	0	0	0	0
MSTRG.16342	NAT-lncRNA	II	LOC105045802	not available	12.2241	0	0.712727	0	0.900325	12.2241	0	0	0	0	0	0	3.96082	0	0	0.829483	0	2.29582	0	0	3		0	0	0	0	0	0	0	0	0	0	0	0	0	0	0	0	0	0	0
MSTRG.16344	NAT-lncRNA	I	LOC105045804	0 < FPKMmax < 1	3.28788	0.320545	1.14094	3.28788	0.409408	2.77584	2.0157	2.62214	2.36864	1.8567	1.83807	1.6033	1.11177	1.45471	1.65393	0	3.12497	1.5198	1.22374	1.93591	16		0.320545	0	0	0	0	0	0	0	0	0	0	0	0	0	0	0	0	0	0
MSTRG.16344	NAT-lncRNA	I	LOC105045802	0 < FPKMmax < 1	12.2241	0.320545	0.712727	0	0.900325	12.2241	0	0	0	0	0	0	3.96082	0	0	0.829483	0	2.29582	0	0	3		0.320545	0	0	0	0	0	0	0	0	0	0	0	0	0	0	0	0	0	0
MSTRG.16345	NAT-lncRNA	III	LOC105045804	-0.394968	3.28788	5.55358	1.14094	3.28788	0.409408	2.77584	2.0157	2.62214	2.36864	1.8567	1.83807	1.6033	1.11177	1.45471	1.65393	0	3.12497	1.5198	1.22374	1.93591	16		0	0	5.55358	0	0	0	0	0	0	0	0	0	0	0	0	0	0	0	1
MSTRG.16345	NAT-lncRNA	I	LOC105045802	-0.0221619	12.2241	5.55358	0.712727	0	0.900325	12.2241	0	0	0	0	0	0	3.96082	0	0	0.829483	0	2.29582	0	0	3		0	0	5.55358	0	0	0	0	0	0	0	0	0	0	0	0	0	0	0	1
MSTRG.16368	NAT-lncRNA	III	LOC105045788	0 < FPKMmax < 1	19.5915	0.622078	10.898	3.8515	9.98782	2.33363	2.05774	7.46368	7.1994	18.8364	17.4496	16.681	19.5915	6.1707	16.3785	0	2.15484	4.53499	7.04568	2.35736	17		0	0.36582	0	0	0	0	0.601629	0.622078	0	0.239344	0.280163	0	0	0	0	0	0	0	0
MSTRG.16567	NAT-lncRNA	III	LOC105045627	not available	31.753	0	14.5267	12.5015	5.49327	18.4867	21.6235	4.89878	5.89802	20.1327	25.0812	24.1624	18.5312	17.5641	20.9342	0	6.78647	23.6738	31.753	12.7304	17		0	0	0	0	0	0	0	0	0	0	0	0	0	0	0	0	0	0	0
MSTRG.16589	NAT-lncRNA	III	LOC105046352	-0.124322	35.3761	2.81499	35.3761	14.7253	5.13722	14.2413	16.9072	26.5226	27.7515	24.3009	27.9012	24.2141	21.7271	25.605	33.8291	0	13.4115	13.307	8.63057	7.51688	17		0	0.736353	0	2.81499	2.04183	0.195169	0	0.0418004	0.0436347	0	0.21638	0.0573482	0.0495357	0	0	0	0	0	2
MSTRG.16595	NAT-lncRNA	III	LOC105046350	0.148083	31.4446	1.01406	2.4574	0	1.29183	5.92152	14.4992	31.4446	28.4608	21.7909	19.7995	9.93931	20.9773	10.2872	14.8741	0.821099	6.93344	5.37826	10.582	3.51986	16		0	1.01406	0	0	0.293565	0.784893	0	0.721761	0.47038	0.520445	0.355199	0	0.319496	0.821099	0.46634	0	0	0	1
MSTRG.16625	NAT-lncRNA	III	LOC105046324	-0.129802	260.39	1.75761	26.7345	46.9864	260.39	0	0.138455	66.4391	28.6997	0.904051	2.81114	0.180132	0	0.577385	0.405497	0	0.518666	11.3008	1.76226	3.86854	9		0.141495	0	0	0	0	0	0	0.823441	0	0	0	0	0	0	0	0	1.75761	0	1
MSTRG.17004	NAT-lncRNA	III	LOC105046559	0 < FPKMmax < 1	138.192	0.120428	36.3735	29.5338	138.192	11.5147	26.8995	38.3224	40.273	62.6717	81.1066	52.6203	57.0872	67.7713	52.8916	0.0209582	19.0165	27.6419	38.6165	16.2442	17		0	0	0	0	0	0	0.0269629	0	0.0681544	0	0	0.0222547	0	0.0209582	0.111386	0.031275	0.0562763	0.120428	0
MSTRG.17067	NAT-lncRNA	II	LOC105046616	0.0296343	4.82054	8.02376	2.73702	0.32955	0.105531	4.30007	0	1.82641	2.15866	0	0	0	0.12495	0	0.197826	0	0.715434	1.06373	4.82054	0.0768338	6		2.73702	0	8.02376	3.23201	0	0	1.46396	0	0	3.26123	0.611664	1.42471	0	1.84817	2.81843	2.7185	0.36148	1.41705	10
MSTRG.17117	NAT-lncRNA	IV	LOC105046690	0 < FPKMmax < 1	0.771393	2.46528	0	0	0	0	0	0	0	0.0452493	0	0	0.0705235	0	0.771393	0	0	0	0	0	0		0	0	0	0	0	0	0	0	0	0	0	#N/A	#N/A	#N/A	0	0	2.46528	0	1
MSTRG.17117	NAT-lncRNA	IV	LOC105046691	0 < FPKMmax < 1	0.0671583	2.46528	0	0.0671583	0	0	0	0	0	0	0	0	0	0	0.0344615	0	0	0	0	0	0		0	0	0	0	0	0	0	0	0	0	0	#N/A	#N/A	#N/A	0	0	2.46528	0	1
MSTRG.17118	NAT-lncRNA	IV	LOC105046690	not available	0.771393	0	0	0	0	0	0	0	0	0.0452493	0	0	0.0705235	0	0.771393	0	0	0	0	0	0		0	0	0	0	0	0	0	0	0	0	0	0	0	0	0	0	0	0	0
MSTRG.17118	NAT-lncRNA	IV	LOC105046691	not available	0.0671583	0	0	0.0671583	0	0	0	0	0	0	0	0	0	0	0.0344615	0	0	0	0	0	0		0	0	0	0	0	0	0	0	0	0	0	0	0	0	0	0	0	0	0
MSTRG.17173	NAT-lncRNA	III	LOC105046677	0 < FPKMmax < 1	173.509	0.47415	0.380316	0	173.509	164.159	140.292	0	0	2.29106	8.98873	38.3626	7.01993	9.52118	10.5577	0.0245297	3.13627	4.73394	3.41719	1.97444	13		0	0	0	0	0.47415	0	0.0952267	0.0190846	0.0199321	0	0.0245375	0	0.0226576	0.0245297	0.0436392	0	0	0	0
MSTRG.17217	NAT-lncRNA	III	LOC105046707	0 < FPKMmax < 1	13.3961	0.866991	0	6.37158	13.3961	8.12873	6.53206	6.42965	12.9066	6.24724	10.0029	8.25551	5.42852	5.72073	8.06778	0	3.77931	2.76363	1.79442	0	15		0	0.228813	0.018944	0.866991	0.128916	0.0981471	0.137536	0.328457	0	0	0.192305	0.794125	0.671431	0.277771	0.62346	0.414754	0.430606	0.605349	0
MSTRG.17250	NAT-lncRNA	III	LOC105046733	0 < FPKMmax < 1	27.5016	0.423707	18.0754	27.5016	7.36105	18.2446	18.5054	13.0122	10.7992	26.9703	12.8022	25.7021	12.2147	12.351	19.3277	22.0166	5.49445	7.02105	8.08967	3.40346	18		0	0	0	0	0	0.11067	0	0	0	0	0	0.197326	0.042686	0	0.423707	0	0.0651296	0	0
MSTRG.17271	NAT-lncRNA	III	LOC105046734	0 < FPKMmax < 1	4.70929	0.606194	0	0	0	4.37588	0	1.02382	0.702228	0	0	0	4.70929	3.40984	0	1.74114	2.51765	0	0	0	6		0	0	0	0	0.0254536	0	0.081439	0.0328403	0.0343006	0.0759924	0.0210957	0.134407	0.0194985	0	0	0.125948	0.0585336	0.606194	0
MSTRG.17302	NAT-lncRNA	III	LOC105046754	0 < FPKMmax < 1	5.57768	0.287054	0	0	0.0556765	0	0	0	0	0	0	1.46988	0	1.75846	0	5.57768	1.33676	1.18683	0.610207	0	5		0	0.278129	0	0	0	0.0552128	0	0	0	0	0	0	0	0.115767	0	0.287054	0.0649842	0	0
MSTRG.17699	NAT-lncRNA	III	LOC105046912	0 < FPKMmax < 1	4.41274	0.98149	0	1.07705	0	3.60029	3.3637	4.17815	0	0	1.17906	0	0	0	0	4.41274	0	0	0	0	6		0	0	0	0	0	0	0	0	0	0	0	0	0	0.25848	0	0	0.98149	0	0
MSTRG.17892	NAT-lncRNA	III	LOC105047047	0 < FPKMmax < 1	95.2631	0.0638994	26.6099	95.2631	1.97181	1.8389	1.15845	4.22427	2.44525	3.73463	6.71592	1.8781	6.80389	5.10992	2.14471	0.0502754	0.0690021	0.934681	2.32259	4.09849	15		0	0.0199052	0	0.0205785	0	0.0191143	0	0.0130511	0.0136325	0.0453062	0.0335024	0.0355835	0	0.0502754	0	0	0.0223394	0.0638994	0
MSTRG.18005	NAT-lncRNA	III	LOC105047115	not available	0	2.19998	0	0	0	0	0	0	0	0	0	0	0	0	0	0	0	0	0	0	0		0	0.191429	0	0	0	0.217792	0	0.350981	0	0.134875	0	0.815869	0.551169	0	2.19998	0	1.54357	1.01015	3
MSTRG.18268	NAT-lncRNA	III	LOC105047314	-0.384654	121.479	3.64354	108.759	44.6003	25.6489	62.3543	41.3293	65.1066	81.7461	97.5505	75.0003	120.08	58.2508	83.0365	121.479	0	29.3608	40.2372	34.5558	9.56109	17		0	0	0	0	0	0	0	0	0	0	0	0	0	0	3.64354	0	3.21222	1.28885	3
MSTRG.18348	NAT-lncRNA	III	LOC105047369	0.153293	52.7172	2.15255	38.6054	52.7172	5.27388	13.7341	16.4383	5.98309	6.43214	31.5615	32.1993	50.4036	29.9605	38.7265	51.8893	0	6.6897	20.603	42.5024	12.4113	17		0.0956578	0.455086	0	0	0.230608	0	0	2.15255	0	0	0	0	0	0	0	0.309999	0	0	1
MSTRG.18553	NAT-lncRNA	III	LOC105047552	-0.0808119	1.81918	5.9679	0	0	0	0	0	0	0	0	0	0	0	0	0	1.81918	0	0	0	0	1		0	0.164318	0	5.9679	1.59967	0	0.215005	0.621473	0.649038	0.223108	0.471209	0.234148	0.10175	0.303104	1.27097	0.332158	1.42182	0	4
MSTRG.18613	NAT-lncRNA	III	LOC105047596	0.408953	3.91752	1.27032	0	0	3.07754	3.67898	1.13224	0	0	0	0	0	3.91752	0.979968	3.63167	2.60918	0	1.05002	1.79421	0.562846	8		0	0	0	0	0	0	0	0	0.382662	0.428342	0.508173	0	1.27032	0	0	0	0	0	1
MSTRG.18648	NAT-lncRNA	III	LOC105047618	0.642422	9.80747	1.05611	2.87034	5.36155	1.31807	9.80747	7.14655	4.41358	5.37594	2.58832	6.07023	3.08631	5.93469	3.87817	5.51101	0.121389	0	3.90394	4.08318	2.95677	16		0	0	0	1.05611	0.263945	0.112	0.188419	0	0	0.218527	0.364274	0.232053	0.437929	0.121389	0	0.582489	0.229466	0.233366	1
MSTRG.18766	NAT-lncRNA	III	LOC105047709	0 < FPKMmax < 1	458.682	0.891797	61.7271	33.0227	111.869	14.0287	10.2905	86.7938	104.102	54.2942	27.5949	60.1795	16.6131	19.5603	23.3368	0	36.3849	458.682	17.141	42.7156	17		0	0	0.117018	0.0648357	0.0636544	0.791863	0.375856	0.737225	0.106936	0.0473798	0.0263402	0.0838888	0	0	0.891797	0	0.0356737	0.659479	0
MSTRG.18822	NAT-lncRNA	III	LOC105047748	-0.227586	435.654	3.50483	84.4784	37.8747	184.232	33.4632	43.4177	435.654	275.288	61.0409	64.8909	53.601	57.5882	43.9509	83.9594	0	67.1995	46.0076	53.3854	20.0925	17		0.157836	2.73472	0.0712702	3.50483	2.756	0	0	0	0	0	0	0	0	0	0	0	0	0	3
MSTRG.19003	NAT-lncRNA	II	LOC105047894	not available	0	3.03814	0	0	0	0	0	0	0	0	0	0	0	0	0	0	0	0	0	0	0		0	0	0	0	1.5703	1.452	3.03814	0	1.91937	1.69988	0	0	0	0	0.533628	0	0	0	5
MSTRG.19567	NAT-lncRNA	III	LOC105048306	0 < FPKMmax < 1	17.5265	0.127118	12.4013	7.2748	3.4848	4.76864	6.4523	14.7517	17.5265	9.72492	14.4972	15.9143	9.18179	11.0786	15.5517	0	3.54049	4.85178	7.86066	1.83049	17		0	0	0	0	0	0	0	0	0	0	0.120305	0.127118	0	0	0	0	0	0	0
MSTRG.19883	NAT-lncRNA	III	LOC105048439	0.869808	101.62	3.35788	10.7159	2.8862	10.5787	70.459	101.62	15.1764	13.7999	54.1796	15.2709	21.3902	21.1196	23.8275	36.1211	0.107737	10.1402	36.358	33.8793	3.19562	17		0	0	0	2.2012	3.35788	0	0	0.414804	0	0	0	0	0	0.107737	0.211933	0	0	0	2
MSTRG.20128	NAT-lncRNA	III	LOC105048643	-0.200837	34.1023	1.07403	0	1.5196	0	1.7462	0	0	0	0	5.82022	8.03884	0	3.37775	3.46579	34.1023	1.33593	0	0	0.813347	8		0	1.07403	0.0333328	0.601331	0.953089	0.150745	0.120665	0.0879332	0.0459236	0	0	0.0999304	0.0174055	0	0.332635	0.0280021	0.125902	0.179844	1
MSTRG.20300	NAT-lncRNA	III	LOC105048840	0 < FPKMmax < 1	13.9112	0.601264	6.12098	13.9112	1.21476	6.44044	3.69362	1.77943	1.02035	5.48911	4.42207	8.02872	4.07911	6.85644	5.27142	0.902281	1.73735	3.84361	3.67169	1.63584	17		0	0.275668	0	0.190093	0.0665695	0.0751682	0.126211	0.146737	0.0991867	0.0998976	0.0995829	0.141065	0.0717934	0.132908	0.601264	0.342134	0.102362	0.125902	0
MSTRG.21045	NAT-lncRNA	IV	LOC105049286	0 < FPKMmax < 1	1.15548	0.39845	0	0.273744	0.0685674	0.0938223	0.184986	0.0937153	0	0.34847	0.36363	0.201264	0.151028	0.07997	0.0687359	1.15548	0.142138	0.365246	0.452482	0.153096	1		0	0.314278	0.125894	0.152034	0.0676546	0	0.0726661	0.20032	0.0883736	0	0.39845	0	0.0902568	0.153186	0	0	0.113585	0	0
MSTRG.21440	NAT-lncRNA	III	LOC105049602	0.737722	25.3301	5.05635	0.287588	0.282333	0.893883	25.3301	7.2108	0.408018	0.685958	0.0308053	0.0804398	0.0712863	0.0197827	0.0210084	0.0548753	1.61367	0.0350029	0	0.132553	0.0378474	3		0.151838	0	0	5.05635	2.71921	0.982019	0	1.42689	1.97912	0.705743	0.275212	0.866034	0.71477	1.61367	2.39062	0.53798	3.34963	0.635887	7
MSTRG.21756	NAT-lncRNA	I	LOC105049814	0.33069	4.43203	3.52073	4.43203	0.666768	0	0	0	0	0	3.34455	3.20497	0	0	1.06374	1.0714	3.50957	0	0	0	0	6		0	0.663241	0.019008	2.10886	0.72436	0.123107	0.110409	3.52073	2.09134	0.521246	0.36446	0.432538	0.237764	0.343015	0.684015	0.70431	0.316872	0.575183	3
MSTRG.21905	NAT-lncRNA	III	LOC105049895	0 < FPKMmax < 1	27.9964	0.892452	16.649	27.9964	18.2052	7.21586	5.58578	0	23.9095	0	0	12.7052	9.75415	10.5689	0	1.6536	0	0	17.9831	0	11		0.0109311	0.186083	0	0.467437	0.16177	0.012687	0.156219	0.0611743	0.086729	0.0101143	0.0224061	0.0773647	0.0726879	0.0392488	0.726715	0.445467	0.222138	0.892452	0
MSTRG.22196	NAT-lncRNA	III	LOC105050104	0 < FPKMmax < 1	11.5245	0.612377	11.5245	5.98253	0.278674	3.37027	4.19529	2.26942	2.82745	5.16656	5.42372	1.3857	2.13987	0.921094	2.07119	2.57534	7.07395	3.26717	8.39873	3.351	16		0	0.120496	0	0	0.122113	0	0	0.151571	0.158103	0.612377	0.495221	0	0.0895652	0	0.382616	0	0.151749	0	0
MSTRG.22224	NAT-lncRNA	III	LOC105050127	-0.281015	12.1102	1.33677	4.99812	9.98156	3.85285	6.55912	5.75943	4.06484	7.34325	0	12.1102	7.43358	3.47373	4.48236	8.15116	0	0	7.55395	0	8.65153	14		0	0.281539	0.0300259	0	0.530194	0	0	0	0	0.241919	0.909493	0	0	0	1.33677	0	0	0	1
MSTRG.22613	NAT-lncRNA	II	LOC105050393	0.140174	2.45653	3.80763	1.44523	1.02417	0	0.0540362	0.0176669	0.659437	0.579435	0.888161	0.31437	0.648547	0.35203	0.560904	0.544795	0	0.864363	0.935235	2.45653	0.223341	3		1.15487	3.05415	0	0	0	1.26682	0	1.87312	0.978154	1.68901	1.61922	1.87812	2.43131	0.865386	3.80763	0	0	0	9
MSTRG.22905	NAT-lncRNA	III	LOC105050655	0.0978282	98.6327	1.81728	34.3241	23.7789	12.6748	46.762	53.5522	52.8683	55.6477	54.7746	67.1176	51.5356	50.709	42.6474	49.9782	0.45843	42.5939	70.1421	98.6327	21.1244	17		0	0	0	1.01377	0.286525	0.305331	0.521858	0	0.459755	0	0.462607	0.244461	0.416421	0.45843	1.81728	0.197117	0.545918	0.487984	2
MSTRG.23137	NAT-lncRNA	III	LOC105050807	-0.231723	44.3797	1.54721	21.7047	15.2966	24.3428	35.3733	34.5153	41.9441	26.0743	38.8429	44.3797	28.4686	32.332	25.2796	35.0078	0.253767	8.34775	30.8615	21.4526	15.6719	17		0	1.54721	0.0379216	0.430421	0.36005	0.300722	0.056369	0.48996	0.476173	0.113891	0.296666	0	0.428307	0.253767	0.845424	0.521189	0.834866	0.571484	1
MSTRG.23453	NAT-lncRNA	III	LOC105051073	-0.218409	29.2962	1.35073	3.66192	11.3004	11.7562	12.0295	10.9903	12.8004	16.0388	0	29.2962	23.1047	0	0	0	15.2124	0	9.8177	10.2998	0	12		0	0.104966	0	0.108507	0.106454	0	0.0678284	0	0.395195	0.0318395	0.176622	0	0.245113	0.0353366	1.35073	0.104957	0.176915	0.404618	1
MSTRG.23503	NAT-lncRNA	III	LOC105051040	0 < FPKMmax < 1	25.4078	0.965057	15.0936	3.77838	17.3928	1.96979	9.97687	25.4078	8.76968	0.0486962	3.89023	0.0563241	0.250817	0.232927	0.115577	0	0.112346	1.5187	12.4829	4.00562	11		0	0	0.965057	0	0.258124	0.621872	0.361675	0	0	0	0	0	0	0	0	0	0.711614	0	0
MSTRG.23739	NAT-lncRNA	III	LOC105051229	not available	81.2681	0	0	4.2927	0.925414	81.2681	47.6805	3.18051	2.16742	1.66827	0	3.12649	0.94458	0	0	1.73448	1.50966	0.783952	2.4559	1.28248	11		0	0	0	0	0	0	0	0	0	0	0	0	0	0	0	0	0	0	0
MSTRG.23915	NAT-lncRNA	II	LOC105051301	0 < FPKMmax < 1	7.91247	0.747781	4.99123	3.71499	6.42669	7.91247	4.30126	0	2.76492	1.8747	2.19452	2.07632	1.55563	1.75863	1.17626	6.77679	1.84194	1.27627	0	0	15		0	0.0892508	0	0.0917826	0.180939	0.0914858	0	0.0568535	0.0593285	0	0	0	0.067293	0.0735219	0.138835	0.118856	0.216891	0.747781	0
MSTRG.23915	NAT-lncRNA	IV	LOC105051304	0 < FPKMmax < 1	2.18519	0.747781	0	0.175256	0.260651	0.0113393	0	0	0	0.236618	0	0	0.475846	0.0653414	0.672125	2.18519	0	0	0	0	1		0	0.0892508	0	0.0917826	0.180939	0.0914858	0	0.0568535	0.0593285	0	0	0	0.067293	0.0735219	0.138835	0.118856	0.216891	0.747781	0
MSTRG.23935	NAT-lncRNA	III	LOC105051313	not available	57.8029	0	2.9538	21.7228	10.1645	24.6784	11.8198	40.7918	38.2417	27.3811	39.7848	23.6446	25.8054	17.4394	31.2186	25.3321	11.4784	57.8029	21.074	16.9089	18		0	0	0	0	0	0	0	0	0	0	0	0	0	0	0	0	0	0	0
MSTRG.23968	NAT-lncRNA	III	LOC105051349	0 < FPKMmax < 1	34.4304	0.0962707	34.4304	14.7505	7.09225	31.6954	30.832	25.6942	29.3867	26.7926	23.0607	28.8416	23.2579	20.3355	24.9959	0	10.5569	14.7624	15.2721	7.46665	17		0	0.0543706	0	0	0	0	0	0.0351373	0	0	0	0.0962707	0.0416618	0.0452796	0	0	0	0	0
MSTRG.24063	NAT-lncRNA	III	LOC105051407	0 < FPKMmax < 1	10.3902	0.700337	0	7.05017	10.3902	5.49707	6.21131	7.93184	7.73867	7.0059	9.28908	7.26057	4.16876	8.39361	6.68088	6.59496	2.48232	4.37186	2.2742	1.44211	17		0	0	0	0	0.0889724	0	0.507757	0	0	0.0646303	0.145394	0	0.331118	0	0.409188	0.700337	0.532311	0.440826	0
MSTRG.24560	NAT-lncRNA	III	LOC105051746	0 < FPKMmax < 1	15.1707	0.277558	3.65263	7.85606	1.62675	9.55059	10.8692	15.1707	14.5598	10.0179	10.555	9.65145	5.30588	4.18674	8.90128	0	8.0624	6.43755	12.378	3.55721	17		0	0	0	0	0	0.053288	0.240262	0	0.145427	0.0203028	0.0676336	0.0240623	0	0.0226223	0	0.277558	0.188292	0.176469	0
MSTRG.24600	NAT-lncRNA	III	LOC105051715	0.0239416	3.72581	3.40813	0	0	0	2.63489	0	1.56446	0	0	2.8411	0	1.9511	3.3994	0	3.3401	3.14403	0	3.72581	0	8		0	0	0	0	0.640154	0	0	0	3.40813	0	0	0	3.14159	0	0	0	0	0	2
MSTRG.24696	NAT-lncRNA	III	LOC105051959	0 < FPKMmax < 1	73.8959	0.36593	8.90108	4.30011	43.7497	26.0396	31.8172	32.0308	38.5999	48.0021	27.5403	13.3497	15.4136	15.7885	22.9516	1.13984	10.9682	73.8959	26.8708	17.5619	18		0.0764832	0	0	0	0	0	0	0	0	0	0	0	0	0	0	0.36593	0	0	0
MSTRG.24941	NAT-lncRNA	III	LOC105052086	-0.0557193	20.5373	1.05978	0	2.77901	1.3151	7.96227	7.02408	5.06916	6.70779	13.8761	11.2191	15.7249	19.0331	19.5478	20.5373	18.7635	8.73823	11.2193	14.2025	3.82027	17		0	0.10907	0	1.05978	0.287599	0	0	0	0	0	0.0733966	0.194874	0.152758	0	0.421413	0.136427	0.392529	0.315486	1
MSTRG.25577	NAT-lncRNA	III	LOC105052706	0 < FPKMmax < 1	30.232	0.78691	16.7505	27.7787	10.7427	26.3843	18.7242	27.8779	30.149	24.5021	18.6469	18.9361	25.7952	16.1721	19.5603	0	11.8943	30.232	13.6109	8.69175	17		0	0.0209223	0	0.108228	0	0	0	0	0	0.0239116	0.0441164	0	0.0245512	0	0.78691	0.233147	0.0697176	0.317211	0
MSTRG.25607	NAT-lncRNA	III	LOC105052691	0 < FPKMmax < 1	13.6877	0.812229	0.0898698	0	0	0	3.02408	0	8.95236	10.0508	13.6877	8.77703	11.0359	8.06027	11.7059	0	2.66907	4.74694	4.37623	1.87452	12		0.0898698	0.812229	0	0	0	0	0	0	0	0.020153	0	0	0	0.179676	0	0	0	0	0
MSTRG.25818	NAT-lncRNA	III	LOC105052554	0 < FPKMmax < 1	30.8277	0.914751	16.3954	9.6058	3.28924	30.8277	22.3894	14.5796	19.9074	22.6175	15.3595	21.9711	12.3577	17.4902	17.5841	0.226578	13.5218	5.47234	12.5423	5.17578	17		0.0568695	0.478208	0	0.914751	0.277037	0	0	0	0	0	0.511553	0.0602492	0	0.226578	0	0.089186	0	0.9038	0
MSTRG.26311	NAT-lncRNA	III	LOC105053060	not available	186.309	0	93.0241	41.1132	22.1046	50.513	61.3949	32.1101	36.6371	70.3601	75.8209	54.7653	186.309	88.8328	106.848	0	48.6485	68.3335	115.325	38.9568	17		0	0	0	0	0	0	0	0	0	0	0	0	0	0	0	0	0	0	0
MSTRG.26535	NAT-lncRNA	III	LOC105053205	0.260965	36.9367	2.43214	0	2.95889	1.89043	11.8573	11.3331	9.81974	12.523	22.7532	13.7307	13.0131	11.0142	12.5564	15.264	5.0537	6.83744	36.9367	21.4365	8.62727	17		0	1.03328	0	2.43214	1.39385	0	0.550554	0.39428	0.410176	0.22745	0	0.557814	0.691673	0	0.575016	1.03355	0.494132	0	4
MSTRG.26541	NAT-lncRNA	III	LOC105053208	0 < FPKMmax < 1	2.6936	0.420363	0	0	0	0	0.880224	0	0	0	0	0	0	0	0	0.0774418	2.6936	0	1.90509	2.58957	3		0	0.139135	0	0.0957003	0.0470268	0	0	0.210506	0.1884	0.0695504	0.0775729	0	0.107013	0.0774418	0.420363	0.415265	0.268063	0.226975	0
MSTRG.26667	NAT-lncRNA	II	LOC105053365	0 < FPKMmax < 1	7.9471	0.459328	0	0	0.0887354	4.14439	7.9471	0	1.10464	0	0	0.373826	0.250374	0.29881	0	0	0	0	0	0	3		0	0	0.0781401	0	0	0	0.369825	0	0	0	0.28628	0	0	0.135081	0	0	0	0.459328	0
MSTRG.26690	NAT-lncRNA	III	LOC105053376	0 < FPKMmax < 1	27.397	0.338441	10.7202	12.0961	3.73616	9.29223	5.92801	19.1337	17.4374	20.69	18.2125	19.4328	11.5014	13.5407	13.2325	0	12.4568	25.8532	27.397	14.9959	17		0	0.0733241	0	0	0	0	0	0.0470152	0	0	0	0.129155	0	0	0.338441	0	0.0874335	0	0
MSTRG.26734	NAT-lncRNA	III	LOC105053473	0 < FPKMmax < 1	11.9837	0.269113	3.22243	11.9837	7.62409	1.15456	1.21609	3.44614	5.67792	0	5.224	3.42596	2.6764	2.24823	2.72295	8.26309	1.34976	2.89789	1.46209	0	16		0	0	0.00438788	0.042767	0.0538894	0	0	0	0	0	0	0.0794581	0.0370259	0.0399385	0.269113	0.192416	0.0652467	0.18791	0
MSTRG.26863	NAT-lncRNA	II	LOC105053403	0 < FPKMmax < 1	26.0379	0.536708	0	0.14988	0.0867655	26.0379	15.5049	0	0	0.20296	0.123734	0	0.224405	0.0446956	0.155873	0.343951	0.0822212	0	0.0863436	0	2		0	0.536708	0	0	0	0	0	0	0	0	0	0	0.0298042	0.11409	0	0	0	0	0
MSTRG.26928	NAT-lncRNA	IV	LOC105053533	not available	1.53039	0	1.16298	1.3929	0.0288082	0.85573	1.53039	1.41114	0.769594	0.875423	0.742145	0.983649	0.618738	0.536127	0.678166	0	0.717543	0.579468	1.38869	0.651866	5		0	0	0	0	0	0	0	0	0	0	0	0	0	0	0	0	0	0	0
MSTRG.26928	NAT-lncRNA	IV	LOC105053537	not available	22.4071	0	0	2.06722	0	17.8596	0	1.92909	2.07522	16.5177	10.7548	0.913052	0	4.63037	10.1165	4.30949	0.763643	22.4071	3.96865	9.72567	12		0	0	0	0	0	0	0	0	0	0	0	0	0	0	0	0	0	0	0
MSTRG.27009	NAT-lncRNA	III	LOC105053584	-0.246866	85.5369	1.26171	0	20.5873	35.8438	8.78351	10.5336	59.7832	71.4153	30.1276	85.5369	32.8009	17.1642	20.4902	29.429	36.4575	13.8908	29.6562	12.037	22.7799	17		0	0.308829	0	1.26171	0.112799	0.110426	0.124273	0	0.0750225	0.0830785	0.0928384	0	0.127796	0.0463067	0.591898	0	0	0	1
MSTRG.27010	NAT-lncRNA	III	LOC105053584	0 < FPKMmax < 1	85.5369	0.463224	0	20.5873	35.8438	8.78351	10.5336	59.7832	71.4153	30.1276	85.5369	32.8009	17.1642	20.4902	29.429	36.4575	13.8908	29.6562	12.037	22.7799	17		0	0	0	0.463224	0.230463	0	0	0	0.142727	0	0	0	0	0	0.377393	0	0	0	0
MSTRG.27225	NAT-lncRNA	III	LOC105053732	0 < FPKMmax < 1	7.37729	0.570639	0	0	7.37729	0	0	2.76772	0	3.46736	3.37959	1.67411	0.99518	1.32496	0	4.87554	0.79328	0	6.09558	1.13512	9		0	0	0	0.376577	0	0.094068	0	0.0194238	0	0	0	0.0802394	0.0689634	0	0.570639	0	0.111562	0	0
MSTRG.27414	NAT-lncRNA	III	LOC105054226	0 < FPKMmax < 1	13.0814	0.464065	3.94439	8.00503	2.9097	13.0814	10.585	7.41764	8.01457	7.85434	10.1141	7.33354	5.84425	6.07899	6.75809	0.24921	3.5039	3.52327	6.34413	2.46426	17		0	0	0	0.310087	0	0	0	0.289469	0.151064	0	0.0625509	0.132569	0.457145	0.24921	0.464065	0	0.090002	0.250156	0
MSTRG.27484	NAT-lncRNA	III	LOC105054174	0 < FPKMmax < 1	4.33551	0.226255	0.18995	1.64197	4.33551	0.41275	0	0	0	0	0	0	0.740857	0	0	2.06785	0	0.271466	0	0	3		0.18995	0	0	0	0.115966	0	0	0	0	0	0	0	0	0	0.226255	0	0	0.0939169	0
MSTRG.27495	NAT-lncRNA	III	LOC105054165	0 < FPKMmax < 1	67.5588	0.669328	30.1813	31.7401	11.917	12.1772	12.348	17.0892	23.7676	57.0762	67.5588	35.1506	59.9228	56.5456	58.4337	0.107848	22.4977	52.4901	62.6979	15.7775	17		0	0.129932	0	0.669328	0.0658653	0.195169	0.14661	0.167202	0	0.43484	0.10819	0.63083	0.34675	0.107848	0.496922	0.169095	0.383586	0	0
MSTRG.27721	NAT-lncRNA	III	LOC105054026	0 < FPKMmax < 1	4.74873	0.111379	1.24015	0	0.0879367	4.74873	3.6363	0.453251	0.545677	0.101485	0.0454298	1.27493	0.0744636	0.237245	0.0688743	0.0310616	0.328971	0.0830761	0.0747011	0	4		0	0.0370955	0	0.0382999	0	0	0	0	0	0	0	0.0329987	0.0286559	0.0310616	0.111379	0	0	0	0
MSTRG.27906	NAT-lncRNA	II	LOC105053908	0.302722	18.6832	6.02173	0.59647	2.2348	0	10.7811	6.64585	1.16135	0	7.12801	4.1475	1.48791	2.26451	2.72569	5.63239	18.6832	0.477448	1.28561	0.859703	0.620713	12		0	0.920948	0	6.02173	2.45778	0.465291	0	0	1.8237	1.1186	0.847771	1.46675	2.31933	0	0	1.75116	1.4793	0.995366	8
MSTRG.27928	NAT-lncRNA	III	LOC105053894	0.150123	42.8587	1.13675	4.42845	24.4727	0	20.145	8.24332	11.4906	1.66116	35.115	24.4719	14.9828	9.58799	10.6636	42.8587	0.127986	4.38814	24.8608	8.57293	0	15		0	0	0	1.13675	0.160833	0	0	0	0.409982	0	0.25864	0.136582	0	0.127986	0	1.12079	0.207704	0.552138	2
MSTRG.28271	NAT-lncRNA	I	LOC105054501	-0.165275	665.196	3.12943	33.833	44.8286	272.381	9.48192	23.2817	603	665.196	7.68009	3.04492	8.62959	1.04515	1.49338	2.89977	0	10.1455	1.86663	10.326	23.2489	17		0	1.54806	0	0	0	0	0	0.0699273	0	0	0	0	0	0	3.12943	0	1.81698	0	3
MSTRG.28271	NAT-lncRNA	II	LOC105054503	not available	0	3.12943	0	0	0	0	0	0	0	0	0	0	0	0	0	0	0	0	0	0	0		0	1.54806	0	0	0	0	0	0.0699273	0	0	0	0	0	0	3.12943	0	1.81698	0	3
MSTRG.28405	NAT-lncRNA	III	LOC105054676	0.057679	1.53164	2.0504	0.0209413	0.132795	0.0910256	0	0	0.122665	0.0735766	0	0.995642	0	0	0	0	1.53164	0.425215	0.178031	0.0818494	0.195546	1		0	1.44997	0	1.68896	0.209781	0	0.276212	0.62892	0.26208	0.144986	0.500134	0.52724	0.148033	0.49325	2.0504	0	0	1.82924	4
MSTRG.28440	NAT-lncRNA	III	LOC105054613	0 < FPKMmax < 1	33.3116	0.75486	0	17.8407	5.78397	9.54044	7.65455	5.37123	7.27821	24.544	20.1372	33.3116	30.7493	23.9006	22.1032	27.993	8.316	11.4348	20.3293	8.64584	17		0	0	0	0	0	0	0	0	0	0	0	0	0.0725659	0	0.75486	0.129498	0	0	0
MSTRG.28558	NAT-lncRNA	III	LOC105054691	0 < FPKMmax < 1	13.921	0.127404	2.75556	3.18946	5.7986	4.643	2.21303	9.44507	6.00958	9.11421	8.03542	4.17886	9.15819	4.50011	13.921	5.93005	5.25758	4.64738	11.1658	4.03823	18		0	0.0136863	0	0.127404	0.111049	0.0914787	0	0.0359887	0	0	0.0115346	0	0.0855225	0	0	0	0.122044	0.106455	0
MSTRG.28916	NAT-lncRNA	III	LOC105054967	0 < FPKMmax < 1	20.4298	0.980104	0.190064	0	0	6.08481	0	0	0	0	0	0	0	0	0	20.4298	0	0	0	0	2		0.190064	0	0	0	0	0	0	0.268858	0.980104	0	0.178577	0	0	0	0.738136	0	0	0	0
MSTRG.28925	NAT-lncRNA	III	LOC105054962	0 < FPKMmax < 1	26.2684	0.286248	13.371	26.2684	7.07434	14.9943	6.83285	14.1086	16.2177	10.8982	14.8906	15.3857	7.20284	8.48522	10.1109	1.90776	7.69082	8.66137	8.48418	5.9204	18		0	0	0	0.11803	0	0	0.0417834	0	0.0258938	0	0	0.0677815	0	0	0.286248	0.0967551	0	0.185557	0
MSTRG.29342	NAT-lncRNA	III	LOC105055342	0.154213	33.7877	6.09568	0.349505	2.90475	0.13582	3.49764	2.11495	10.8284	3.64721	0	0	1.01819	0	0.430524	0	4.13039	28.6018	0	33.7877	0	9		0	0	0.408377	0	0	1.96981	6.09568	0	0	0.686982	0.406034	0	0	0	1.83304	0	0	0	3
MSTRG.29343	NAT-lncRNA	III	LOC105055342	0 < FPKMmax < 1	33.7877	0.243463	0.349505	2.90475	0.13582	3.49764	2.11495	10.8284	3.64721	0	0	1.01819	0	0.430524	0	4.13039	28.6018	0	33.7877	0	9		0	0	0	0	0	0	0	0.243463	0.181368	0	0	0	0	0	0	0	0	0	0
MSTRG.29406	NAT-lncRNA	II	LOC105055279	0 < FPKMmax < 1	4.62533	0.845459	1.56186	0	0	0.795426	0.430776	3.54042	1.31607	0	4.62533	3.42417	1.61617	0.98304	1.64897	0	0	0	0	1.10436	8		0	0.145901	0	0	0.34519	0.0479567	0.418376	0.094515	0	0	0.331983	0.344997	0	0.365175	0.274556	0	0.845459	0.317792	0
MSTRG.29406	NAT-lncRNA	IV	LOC105055277	0 < FPKMmax < 1	71.5034	0.845459	0.690158	0	0	1.81744	0	0	1.64807	0	0	0	5.14063	0	4.00396	0	11.8227	3.53339	71.5034	2.32413	8		0	0.145901	0	0	0.34519	0.0479567	0.418376	0.094515	0	0	0.331983	0.344997	0	0.365175	0.274556	0	0.845459	0.317792	0
MSTRG.29406	NAT-lncRNA	IV	LOC105055351	0 < FPKMmax < 1	13.0151	0.845459	0.63815	0	0.200621	0.91278	1.11843	0	0.835559	0	0	0	0	0.90964	0	13.0151	0	0	0	0	2		0	0.145901	0	0	0.34519	0.0479567	0.418376	0.094515	0	0	0.331983	0.344997	0	0.365175	0.274556	0	0.845459	0.317792	0
MSTRG.29407	NAT-lncRNA	III	LOC105055280	-0.227621	1.25947	60.0601	0.0782246	1.25947	0.110051	0	0	0.675621	0	0	0.417954	0.377721	0	1.15271	0	1.00265	0	0	0	0	3		0	13.8518	1.8811	60.0601	34.4136	0	7.36753	12.1501	8.61973	1.44218	4.28282	5.75109	5.87118	6.26582	21.0342	17.4003	3.9032	7.9465	16
MSTRG.29634	NAT-lncRNA	I	LOC105055502	not available	37.1028	0	28.2463	19.1587	0	21.039	12.2226	7.60677	12.1085	37.1028	28.7951	22.7079	27.8701	23.3778	27.5229	0	0	0	7.52225	0	13		0	0	0	0	0	0	0	0	0	0	0	0	0	0	0	0	0	0	0
MSTRG.29634	NAT-lncRNA	II	LOC105055542	not available	4.04609	0	0	0.945725	0	4.04609	0	0.84199	0	2.30815	0	1.22628	1.23446	1.4361	0	0	1.38421	0	0	0.93162	6		0	0	0	0	0	0	0	0	0	0	0	0	0	0	0	0	0	0	0
MSTRG.30025	NAT-lncRNA	III	LOC105055666	not available	8.67921	0	0.485415	0	0	1.80711	0	4.70911	0	8.67921	7.20441	0	2.84047	0	3.80752	3.42281	0.663522	0	0	0	7		0	0	0	0	0	0	0	0	0	0	0	0	0	0	0	0	0	0	0
MSTRG.30775	NAT-lncRNA	IV	LOC105056332	-0.106705	28.9832	1.84253	2.56021	11.6181	0	0.0970542	0.760128	0.482631	0.885054	0.0914727	0.0880961	0	0.0524434	0.125181	0	28.9832	0	0	0	0	3		0.148764	0.743251	0	1.01644	1.35498	1.5215	1.84253	0.700241	0.860399	1.03616	0.271307	0.538022	1.4711	0.403829	0	0	0.215659	0.423748	6
MSTRG.30835	NAT-lncRNA	III	LOC105056381	0 < FPKMmax < 1	96.6435	0.891194	15.5966	17.1646	12.3179	11.7705	7.69266	35.0693	44.7108	60.9005	96.6435	29.454	27.6839	32.473	44.8651	0.380207	11.0939	42.4647	21.6331	17.9242	17		0	0	0	0.190566	0.0467466	0	0.0746228	0	0.267962	0.0698446	0.0387613	0.246982	0.197142	0.0387684	0.891194	0.548334	0.129776	0	0
MSTRG.31291	NAT-lncRNA	III	LOC105056679	-0.0911433	11.0984	5.32514	0.103876	0.167356	0.650449	0	0	3.42453	0.276325	2.05508	1.04685	2.2671	0.730764	1.86475	0.566938	4.25614	1.21569	11.0984	0.794527	0.976688	8		0	0	0	0	0	0	0	0	0	0	0	0	0	0	0	0	5.32514	0	1
MSTRG.31857	NAT-lncRNA	III	LOC105057137	0 < FPKMmax < 1	12.8718	0.216962	0.124228	0.316561	4.52422	12.8718	10.3518	2.51967	2.90607	6.55835	5.45636	1.17397	1.68092	0.829236	3.61866	0	0.59835	1.3861	2.47913	3.90173	13		0	0	0	0.216962	0.215671	0	0	0	0	0	0	0	0	0	0	0	0	0	0
MSTRG.32789	NAT-lncRNA	III	LOC105057830	0 < FPKMmax < 1	12.0119	0.841185	12.0119	4.60957	2.68489	3.30361	3.28922	9.45899	7.84828	6.12564	7.12001	5.13953	7.14512	5.61051	6.83993	0	1.47925	2.44842	4.52022	1.31349	17		0	0	0	0	0	0	0	0	0	0	0	0	0	0	0.841185	0	0	0.449352	0
MSTRG.33108	NAT-lncRNA	III	LOC105057973	0 < FPKMmax < 1	0.880567	0.72503	0.749643	0.597752	0.0476973	0	0.584573	0.61581	0.552009	0.237808	0.3799	0.194238	0.520824	0.457773	0.880567	0.121092	0.285432	0.346992	0.335959	0.17148	0		0	0	0	0	0	0	0	0	0	0	0	0	0	0.121092	0.72503	0	0.194345	0	0
MSTRG.33284	NAT-lncRNA	III	LOC105058097	0 < FPKMmax < 1	1.93564	0.229812	0	1.93564	0	0	0	0	0	0	0	0	0	0	0	0	0	0	0	0	1		0	0.0159468	0	0.0494736	0	0.0152581	0.0170853	0.0942588	0.109404	0.0121203	0.0268652	0.0570774	0.0124426	0.0134427	0.0897211	0.138892	0.106916	0.229812	0
MSTRG.33465	NAT-lncRNA	III	LOC105058191	0.208909	14.5248	11.3707	12.9392	8.26444	2.68422	14.5248	3.46713	9.56448	13.3607	14.4477	13.3578	13.5015	14.2169	10.9836	14.2636	10.8511	7.67843	10.8906	12.9592	4.05055	18		0	3.60416	0	11.3707	3.64877	0	0	5.2813	2.0718	0.176431	0.612957	1.29	2.69593	2.40994	1.71617	0	1.07901	0.916568	10
MSTRG.34038	NAT-lncRNA	I	LOC105058640	not available	10.0984	0	9.86656	1.47955	0.915434	0	0	0.70444	0.884506	0	0	3.84229	1.73397	3.07912	3.86496	10.0984	0.382094	0.700288	0.535042	0.343931	7		0	0	0	0	0	0	0	0	0	0	0	0	0	0	0	0	0	0	0
MSTRG.34105	NAT-lncRNA	III	LOC105058689	0 < FPKMmax < 1	3.56658	0.350676	0	1.89111	1.32029	0	0	0	1.79313	0	0	0	1.39857	0	0	3.56658	0	3.28155	3.14322	0	7		0.0129968	0.0789738	0	0.0326683	0	0.0755527	0	0.145236	0.0541839	0.0120055	0.02661	0.0424017	0.0492994	0.0399456	0.350676	0.334048	0.141171	0.278177	0
MSTRG.34338	NAT-lncRNA	III	LOC105059165	0 < FPKMmax < 1	21.0343	0.402076	0.0835372	0	0	5.07653	2.54644	0	2.05663	0	0	0	0	0	0	21.0343	0	0	0	0	4		0.0835372	0	0	0	0	0	0	0	0.0659533	0	0	0.174274	0	0	0.312243	0.402076	0.122581	0	0
MSTRG.34587	NAT-lncRNA	III	LOC105058990	0 < FPKMmax < 1	49.9828	0.432096	0.0248331	16.0935	0	0	0	0	0	0	22.1966	0	0	0	0	12.0464	0	38.5895	49.9828	0	5		0.0248331	0	0	0	0.213562	0.116638	0.163543	0.432096	0.348715	0.045443	0.202053	0.187698	0.279802	0.277715	0	0	0	0.388709	0
MSTRG.34979	NAT-lncRNA	III	LOC105059337	0 < FPKMmax < 1	2.6845	0.430888	0	0	0	0	0	0.53105	0.800824	2.6845	2.50219	2.20974	1.62248	1.82953	1.92621	0	1.33593	0	2.56443	0.424341	8		0	0.0522277	0	0.430888	0	0	0	0	0.105814	0	0.130855	0.0925311	0.0400599	0.0870485	0.396044	0.0671675	0	0.0855091	0
MSTRG.34996	NAT-lncRNA	III	LOC105059344	0 < FPKMmax < 1	7.7548	0.141059	0.0259139	1.63201	0.646319	1.78298	2.13242	0	0	2.6622	4.40577	7.08327	4.53236	1.41101	7.7548	0	0.790513	0.118794	2.76923	0.0507291	10		0	0	0	0	0	0.0869207	0	0	0	0	0	0	0	0	0.141059	0	0	0	0
MSTRG.35120	NAT-lncRNA	III	LOC105059427	0 < FPKMmax < 1	34.1237	0.480476	21.1366	23.7328	6.83671	23.163	25.6641	26.8045	34.1237	26.9227	32.333	24.0493	20.0434	21.9375	24.6804	7.91376	16.6467	28.2945	32.9157	13.1879	18		0	0.152728	0	0.273886	0.10327	0.0678396	0.0650662	0.10055	0.154065	0.0698283	0.0601178	0.0912546	0.0796628	0.0515926	0.480476	0.151243	0.327871	0.422416	0
MSTRG.35285	NAT-lncRNA	I	LOC109506730	-0.0826553	1.69045	2.46688	0	0	0	0	0	0	0	0	0	0	0	0	0	1.69045	0	0	0	0	1		0	2.46688	0	0	0	0	0	0	0	0	0	0	0.630283	0	0	0	0.438794	0	1
MSTRG.35285	NAT-lncRNA	IV	LOC109506743	0.19272	8.51718	2.46688	1.26278	5.27405	0.679801	8.51718	2.70492	0	4.61337	2.46266	2.0696	0.597024	1.72042	0	0	2.45918	2.1293	6.87192	0	0	11		0	2.46688	0	0	0	0	0	0	0	0	0	0	0.630283	0	0	0	0.438794	0	1
MSTRG.35285	NAT-lncRNA	II	LOC105059520	-0.0245441	16.0832	2.46688	8.58198	7.14271	1.67274	16.0832	3.8723	7.78886	5.02992	11.6647	9.41578	8.32484	7.6625	10.1791	5.22638	0	4.8021	6.72763	5.44314	3.71456	17		0	2.46688	0	0	0	0	0	0	0	0	0	0	0.630283	0	0	0	0.438794	0	1
MSTRG.35480	NAT-lncRNA	III	LOC105059625	0.125852	189.065	22.5381	0.802966	50.593	35.4628	13.7919	15.5005	67.6067	57.1583	57.8572	64.741	40.0202	31.305	21.345	45.6376	46.3621	140.118	138.255	189.065	170	17		0.802966	11.1174	1.39706	1.16846	0	0	22.5381	2.82179	0	0	0	0.683105	1.07997	0	4.63211	2.89523	4.34376	1.61758	10
MSTRG.35915	NAT-lncRNA	II	LOC105059928	0 < FPKMmax < 1	0.891032	0.139679	0	0	0	0	0	0	0	0	0	0.891032	0	0	0	0	0	0	0	0	0		0	0	0	0.0286896	0	0	0	0.0544378	0.0663324	0.0629803	0.0233244	0.0495302	0.0646345	0	0.0414273	0.139679	0	0.089567	0
MSTRG.35915	NAT-lncRNA	I	LOC105059931	0 < FPKMmax < 1	1.60346	0.139679	0	0	0.614837	1.60346	0	0	0	0	0	1.31634	0	0	0.961853	0	0	0	0	0	2		0	0	0	0.0286896	0	0	0	0.0544378	0.0663324	0.0629803	0.0233244	0.0495302	0.0646345	0	0.0414273	0.139679	0	0.089567	0
MSTRG.35979	NAT-lncRNA	III	LOC105059956	0 < FPKMmax < 1	1406.33	0.293912	234.095	191.127	168.973	243.23	283.589	132.998	118.734	893.099	330.805	809.471	1096.27	878.529	1010.98	0	634.769	1406.33	1035.42	239.173	17		0	0.0521222	0	0	0	0	0.0282156	0.102258	0.142405	0	0.197098	0	0.0809481	0	0	0.032723	0.147238	0.293912	0
MSTRG.36240	NAT-lncRNA	III	LOC105060156	0.902482	40.3538	9.55857	0	0	0	40.3538	23.7559	0	0	0	0	2.19281	0	0	0	0	0	0	0	0	3		0	0	0	9.55857	1.09194	0	0	0.540114	0.0805508	0.178393	0.0997613	0	0.137192	0	0.182424	0.154988	0.140475	0	2
MSTRG.36366	NAT-lncRNA	I	LOC105060223	0.0381244	7.55747	1.19903	1.84527	6.99226	0	0	0	1.7778	4.55879	1.72899	0	1.58232	1.46577	1.62853	1.98108	7.55747	0.570979	2.37392	1.89972	1.50199	13		0	0	0	0	0	0.127134	0	0	0	0	0	0	0	0.316699	0.680024	0	1.19903	0	1
MSTRG.36366	NAT-lncRNA	IV	LOC105060222	-0.346557	116.014	1.19903	61.6572	32.0734	49.1692	78.6357	57.3759	34.774	46.0964	86.7992	116.014	99.9133	94.2361	54.538	78.7854	1.0957	26.0096	33.1382	42.3314	20.5316	18		0	0	0	0	0	0.127134	0	0	0	0	0	0	0	0.316699	0.680024	0	1.19903	0	1
MSTRG.36845	NAT-lncRNA	III	LOC105060541	0 < FPKMmax < 1	3.08541	0.435646	0.801955	1.41148	0.163728	2.13832	3.08541	0.487004	0.648809	0.839127	0.375676	0.84518	0.243157	0.72661	1.18921	0.867789	0.891259	1.42466	1.56868	0.659081	6		0	0	0	0.435646	0	0	0	0	0	0	0.171788	0	0	0	0	0	0	0	0
MSTRG.37145	NAT-lncRNA	IV	LOC105060783	not available	0.0785175	0	0	0	0	0.0785175	0	0	0.0416899	0	0	0	0	0	0	0	0	0	0	0	0		0	0	0	0	0	0	0	0	0	0	0	0	0	0	0	0	0	0	0
MSTRG.37381	NAT-lncRNA	IV	LOC105060936	not available	50.2475	0	0	0	13.3242	7.49998	1.21579	7.84131	16.3107	10.3549	11.4751	0	10.1264	0	0	50.2475	0	24.9483	0	0	10		0	0	0	0	0	0	0	0	0	0	0	0	0	0	0	0	0	0	0
MSTRG.37579	NAT-lncRNA	III	LOC105061000	0 < FPKMmax < 1	48.1837	0.48678	21.5121	21.1038	18.9189	13.964	17.1304	43.742	48.1837	17.397	17.9643	12.794	9.3433	8.30502	15.0982	0	6.13345	5.81934	7.43	4.44915	17		0	0.234768	0	0	0	0.462272	0.0544996	0	0.156632	0	0.0418985	0.0454386	0.121549	0	0.425742	0.48678	0.278427	0.306495	0
MSTRG.37584	NAT-lncRNA	III	LOC105061004	0 < FPKMmax < 1	8.43223	0.0733707	1.46838	2.27671	0	0	0	0	8.43223	0	0	0	0	1.16412	2.33122	5.53825	0	1.64916	0	0.71063	7		0	0	0	0	0	0	0	0	0	0	0	0	0	0	0.0733707	0	0.0562007	0	0
MSTRG.37721	NAT-lncRNA	III	LOC105061090	not available	9.24783	0	1.04635	7.72063	0	9.24783	3.32276	1.57304	0.662289	1.87131	1.87824	1.52218	1.57929	1.84573	2.88602	4.53621	6.19867	1.58793	6.24301	0.412919	15		0	0	0	0	0	0	0	0	0	0	0	0	0	0	0	0	0	0	0
MSTRG.37787	NAT-lncRNA	III	LOC105061136	not available	17.9661	0	6.74473	6.57912	7.1574	4.86012	5.93647	8.35038	9.90188	10.8182	17.9661	14.5429	9.60907	6.63134	9.13437	0	3.46456	11.8482	8.41363	4.6319	17		0	0	0	0	0	0	0	0	0	0	0	0	0	0	0	0	0	0	0
MSTRG.38015	NAT-lncRNA	III	LOC105061255	0 < FPKMmax < 1	0.906002	2.196	0	0	0.259734	0	0	0	0.5237	0	0	0.224962	0.906002	0.515119	0	0	0	0.372941	0	0	0		0	0.0374877	0	0.503868	0.380197	0.07192	0.0604201	1.65931	0.860518	0.497991	0.299785	0.904989	1.60661	0.615673	2.196	0.771557	1.53367	0.0901929	4
MSTRG.38339	NAT-lncRNA	III	LOC105061404	0 < FPKMmax < 1	7.70913	0.626105	0	1.23685	0.906511	7.70913	0.505955	6.39292	0	0.562279	0	0	0	0.30168	0	3.89457	0.90839	0	0	0.732894	4		0	0	0	0	0.112419	0.106664	0.0478115	0.191126	0.0606734	0.0336063	0.0559407	0.0396066	0.0344941	0.0652806	0.626105	0.249654	0.174601	0.320701	0
MSTRG.38436	NAT-lncRNA	III	LOC105061459	0 < FPKMmax < 1	21.1734	0.241768	0	8.38149	0	10.649	3.67272	4.17438	6.79538	7.34155	6.48515	3.05509	4.4841	4.15514	5.34908	4.70485	10.3794	21.1734	13.5189	4.19493	16		0	0	0	0	0.0719129	0.241768	0	0	0	0	0.0297299	0	0.0548236	0	0.159517	0.0898062	0.202436	0.0574557	0
MSTRG.38982	NAT-lncRNA	IV	LOC105032090	0 < FPKMmax < 1	17.3938	0.928151	1.27538	0	0.143436	17.3938	0	0	1.18943	0	0	0	0	0	1.82958	0	0	0	0	0	4		0.286312	0.692433	0.200984	0	0	0.751512	0.230399	0	0.203845	0	0	0.218084	0	0	0.346822	0.928151	0.793325	0.249799	0
MSTRG.39026	NAT-lncRNA	II	LOC105032120	-0.00890544	189.713	16.4051	0	0	0.0412328	3.32075	0	0	2.14319	0	189.713	0	115.142	13.7085	5.34581	0	11.9432	12.2523	41.8298	9.88473	10		0	0.450931	0	0	0	0	0	0	0	0	0	0	0	0	0	16.4051	15.2404	12.5665	3
MSTRG.39026	NAT-lncRNA	IV	LOC105032119	-0.0945336	6.36992	16.4051	0.303077	6.36992	0	0	0	0	0	0	0	0	0	0	0	0	0	0	0	0	1		0	0.450931	0	0	0	0	0	0	0	0	0	0	0	0	0	16.4051	15.2404	12.5665	3
MSTRG.39026	NAT-lncRNA	I	LOC105032122	-0.440161	68.8806	16.4051	39.0927	55.7245	14.8787	67.5486	41.083	68.8806	42.5061	0	0	51.7915	0	39.72	0	0	36.7169	0	0	0	10		0	0.450931	0	0	0	0	0	0	0	0	0	0	0	0	0	16.4051	15.2404	12.5665	3
MSTRG.39027	NAT-lncRNA	II	LOC105032120	0.462351	189.713	15.1476	0	0	0.0412328	3.32075	0	0	2.14319	0	189.713	0	115.142	13.7085	5.34581	0	11.9432	12.2523	41.8298	9.88473	10		0	0	0	0	0	0	0	0	0	0	15.1476	0	0	0	0	0	0	0	1
MSTRG.39027	NAT-lncRNA	II	LOC105032119	-0.0617253	6.36992	15.1476	0.303077	6.36992	0	0	0	0	0	0	0	0	0	0	0	0	0	0	0	0	1		0	0	0	0	0	0	0	0	0	0	15.1476	0	0	0	0	0	0	0	1
MSTRG.39027	NAT-lncRNA	I	LOC105032122	-0.242915	68.8806	15.1476	39.0927	55.7245	14.8787	67.5486	41.083	68.8806	42.5061	0	0	51.7915	0	39.72	0	0	36.7169	0	0	0	10		0	0	0	0	0	0	0	0	0	0	15.1476	0	0	0	0	0	0	0	1
MSTRG.39439	NAT-lncRNA	III	LOC105032343	-0.175995	18.5006	1.64157	10.7409	4.04422	16.255	9.02922	9.02389	3.8239	6.77868	14.5965	12.2398	7.73615	6.50468	7.20396	10.3654	12.7324	3.47907	12.8932	18.5006	5.68356	18		0	0.477618	0	0	0.0968235	0.098517	0.11148	0	0	0	0.315896	0.836194	0.502709	0.235609	1.64157	0.639859	1.16932	0.964194	2
MSTRG.39578	NAT-lncRNA	IV	LOC105032425	-0.087258	3.36357	1.1142	0	0	0	0.0619466	0	0	0	0	0	0	0	0	0	3.36357	0.0916427	0	0.211735	0	1		0	0	0	0	1.1142	0	0.29392	0	0	0	0	0	0	0	0.194149	0	0	0	1
MSTRG.39980	NAT-lncRNA	III	LOC105032616	not available	0	13.1428	0	0	0	0	0	0	0	0	0	0	0	0	0	0	0	0	0	0	0		0	13.1428	0	0	0	10.2109	7.43007	0	0	0	0	0	0	0	0	0	3.54663	0	4
MSTRG.40145	NAT-lncRNA	III	LOC105032667	-0.391143	4.43596	1.43904	0	0	2.79356	1.75858	0	0	4.14265	0	0	1.91872	2.39226	0	0	3.3794	1.22078	0	2.45955	4.43596	9		0	0	0	0.417688	0.0799626	0	0	1.43904	1.09394	0	0	1.07484	0	0	0.588363	0	0	0	3
MSTRG.40199	NAT-lncRNA	III	LOC105032695	0.11472	9.3707	1.88347	9.3707	0.652788	0	4.50997	0	0.705843	0	0.168216	0.482967	0	0	1.06541	0	5.66026	0.689735	0.360788	0	0.29935	4		0	0	0	1.18076	0	0	0	0	0	0	0	0	0	0	1.88347	0	0	0	2
MSTRG.40254	NAT-lncRNA	III	LOC105032725	0 < FPKMmax < 1	19.6795	0.353179	0	19.6795	0	0	0	0.246602	0	0	0.461363	0.686865	0	0.199499	0	0.0269271	0	0	0	0	1		0	0.353179	0	0	0	0	0	0	0	0	0	0.0572017	0	0.0269271	0	0	0	0	0
MSTRG.40337	NAT-lncRNA	III	LOC105032776	0.707205	23.717	10.9755	0.782766	10.7587	4.47455	14.2934	5.68508	10.7152	8.60881	7.60074	7.4951	14.1582	7.28583	11.4361	11.1623	5.07933	23.717	18.8889	10.1046	5.79846	17		0	0	0	8.28754	0	0	0	0	0	0	0	0	0	0	10.9755	10.7292	6.64837	5.18984	5
MSTRG.40401	NAT-lncRNA	III	LOC105032799	0 < FPKMmax < 1	9.17789	0.465564	9.17789	6.05259	1.42632	6.96749	7.00694	3.23403	3.83634	3.21499	2.82964	4.09564	3.87701	3.32772	2.89508	0.0813825	1.23688	1.45957	1.68931	0.133709	16		0	0	0	0	0	0	0	0	0	0	0	0	0.0743791	0.0813825	0.465564	0	0	0	0
MSTRG.40439	NAT-lncRNA	III	LOC105032828	0 < FPKMmax < 1	9.8292	0.849624	0.20688	0	0	9.8292	8.05235	0	0	3.35073	0	0	0	7.79646	0	3.86491	0	0	0	1.74326	6		0.20688	0	0.185947	0.849624	0.167417	0	0	0.105493	0	0.304709	0.136952	0.181356	0.0624524	0.408993	0.767166	0	0.0995442	0.137789	0
MSTRG.40538	NAT-lncRNA	III	LOC105032861	-0.0597486	9.3105	1.62337	0	0	0	0	0	0	0	0	0	2.47954	0	1.28475	0	9.3105	3.67996	1.81199	4.06461	1.11086	7		0	0.15018	0	1.62337	0.380617	0	0.0856691	0.304712	0.0502166	0.111195	0	0.594906	0.113974	0.155325	0.231341	0.197317	0.269174	0.374121	1
MSTRG.40766	NAT-lncRNA	III	LOC105032991	0 < FPKMmax < 1	1.2642	0.112803	1.2642	0	0	0.0945722	0.154739	0	0	0	0	0.553972	0	0	0	0	0	0	0	0	1		0	0.112803	0	0	0	0	0	0.071169	0	0	0	0	0.0841403	0	0	0	0	0	0
MSTRG.40980	NAT-lncRNA	III	LOC105033092	0 < FPKMmax < 1	39.5169	0.3192	13.809	39.5169	15.7643	6.32474	18.6357	8.50457	11.2236	9.43863	11.61	14.6694	11.8962	13.1069	9.26422	0.0139739	9.01958	9.22259	23.6363	9.5752	17		0	0	0	0.0171455	0.0168159	0.126987	0	0.0653181	0	0.0377946	0	0	0.0387991	0.0139739	0.3192	0	0.22248	0.132796	0
MSTRG.40996	NAT-lncRNA	III	LOC105033109	-0.367354	1.13506	4.8808	0.835069	0.442904	0.62689	0.422201	0	0.239604	0.42612	0.843081	0	1.08101	0	0.549879	0.3597	0.437672	0.346911	0.781748	0.609356	1.13506	2		0	0.747576	0	4.8808	0.754092	0	0	0	2.57999	0	0.488889	0	0	0.471673	3.36411	0	0	0	3
MSTRG.41474	NAT-lncRNA	III	LOC105033346	0 < FPKMmax < 1	11.868	0.320023	5.70325	4.0982	3.78939	10.7102	11.868	2.68044	5.03985	6.99191	7.30287	10.8113	6.43976	8.38753	7.28185	0	10.4105	3.76807	9.73319	4.12196	17		0	0	0	0.11434	0	0	0	0	0.045411	0	0.0186082	0.0988112	0.103269	0	0	0.0276803	0.0497795	0.320023	0
MSTRG.41529	NAT-lncRNA	III	LOC105033370	0 < FPKMmax < 1	11.8216	0.319568	5.69739	10.0983	7.97428	3.92569	0	3.64105	3.74785	5.89166	4.40294	11.8216	3.80714	0	5.12803	6.10816	3.43074	6.61346	10.9196	0.72168	15		0	0	0	0	0	0	0	0.0603796	0.0630031	0	0	0.0831814	0	0	0.296759	0	0.116233	0.319568	0
MSTRG.41564	NAT-lncRNA	III	LOC105033375	0 < FPKMmax < 1	0.0825151	5.87446	0.0825151	0	0.0824593	0	0	0	0.0238751	0	0	0	0	0	0	0	0	0	0	0	0		0.06427	1.1575	0	4.03919	0	0.156118	0.352406	1.23502	0	0.47479	0.0964891	0	0	0	5.87446	1.06623	1.38647	1.79107	7
MSTRG.41661	NAT-lncRNA	III	LOC105033410	0 < FPKMmax < 1	191.421	0.972165	0	72.1945	54.0489	3.85468	4.6731	34.8206	39.5061	169.665	191.421	70.4532	100.537	76.9992	124.57	71.448	38.9187	84.382	71.3522	51.9529	17		0	0.972165	0.0427846	0.117905	0.0579811	0	0.319933	0	0	0	0	0	0	0.142747	0	0.812721	0	0.751328	0
MSTRG.42109	NAT-lncRNA	III	LOC105033691	0 < FPKMmax < 1	21.6125	0.481893	6.28728	1.71875	3.07034	10.7681	10.4305	11.4793	10.3807	10.4807	14.974	15.4935	21.6125	12.2405	13.2117	0.0810241	9.72472	9.53359	21.5726	7.16984	17		0.0531914	0.0322047	0	0	0	0.0312756	0	0.147044	0.153567	0.0485998	0.108092	0.143435	0.0997407	0.0810241	0.481893	0.0813258	0.43967	0	0
MSTRG.43342	NAT-lncRNA	III	LOC105034222	0.54092	8.93533	6.12955	1.66966	1.73887	0.726844	8.93533	0	1.9136	2.99141	6.05653	1.75902	5.80088	4.47394	3.57093	4.10237	5.11184	1.59656	2.678	2.943	2.65013	16		0.0794175	3.71728	0	4.9688	0	0	1.74644	6.12955	0	0	3.37793	0	0	0	1.54094	1.74846	1.44297	0.478443	8
MSTRG.43942	NAT-lncRNA	III	LOC105034400	0 < FPKMmax < 1	11.2379	0.143325	4.38906	9.28958	1.52038	9.65513	11.2379	6.31753	5.64944	4.702	8.14724	4.33523	4.23749	3.29455	3.23354	0	1.91847	4.05511	4.55514	1.28911	17		0	0.0597095	0	0.0154382	0	0.0142695	0.047929	0	0	0.034052	0.0125769	0.0801657	0.0116528	0	0	0.0742255	0.0833075	0.143325	0
MSTRG.44349	NAT-lncRNA	III	LOC105034584	0 < FPKMmax < 1	17.0056	0.61869	9.70955	1.21765	15.1654	8.13541	7.76587	12.214	12.8754	10.6956	16.7718	17.0056	7.95649	9.25411	12.5172	0.0403896	3.04503	4.87772	7.49921	5.33145	17		0	0.529663	0	0.346307	0.61869	0.43986	0.493024	0.0471614	0	0	0.0605782	0.0214434	0.0373374	0.0403896	0.393186	0.120409	0.0270779	0.463774	0
MSTRG.45310	NAT-lncRNA	III	LOC105034902	0 < FPKMmax < 1	4.98795	0.595555	0	0	0.259876	0	0	0	1.37536	0	0	0	0	0	0	0	4.98795	2.76924	2.70778	3.11103	5		0	0.354365	0	0.595555	0.0449257	0	0.0948008	0	0	0.224563	0.330037	0.489006	0	0.224124	0.458633	0.146817	0.263641	0.378011	0
MSTRG.45520	NAT-lncRNA	III	LOC105034963	-0.141769	8.39167	2.03522	0	1.24912	0	0	0	0	1.42786	0.671774	0	0	0	1.80888	3.56599	8.39167	0	0.964104	2.08324	0	6		0	0	0	0.449148	0.221332	0.08936	0.303002	0.0556794	0.11621	0	0	0.26819	0	0.0719898	2.03522	0.46439	0.529407	0.292351	1
MSTRG.46169	NAT-lncRNA	III	LOC105035197	not available	12.0117	0	0.255082	0.332065	0.24417	12.0117	3.32364	0.922419	0.832101	1.63552	0.49478	0.723667	1.0011	0.294153	0.910878	1.25009	0.245052	0	1.16648	0.380016	6		0	0	0	0	0	0	0	0	0	0	0	0	0	0	0	0	0	0	0
MSTRG.47162	NAT-lncRNA	III	LOC105035464	0.591727	9.5149	1.08608	2.1859	9.5149	3.89177	6.65884	6.21803	8.96078	8.83796	7.52995	6.4185	4.48661	5.06518	4.07565	4.21711	2.26806	6.45477	9.38621	7.00209	4.10556	18		0	0.653802	0	0.28585	0.178513	0.509521	0.516785	0.0493529	0.034365	0.0380675	0.042271	0.0897738	0	0.0211357	1.08608	0.283933	0.340621	0.202454	1
MSTRG.47718	NAT-lncRNA	III	LOC105035618	0 < FPKMmax < 1	16.0042	0.398653	0	10.9091	0	3.03028	0	0	0	6.02008	3.8764	16.0042	9.78203	0	8.80432	0	5.50555	1.5041	10.5813	4.50142	11		0	0.378734	0	0.286214	0.0712393	0.0892633	0.0999015	0.272414	0.120693	0.151544	0.177672	0.201054	0.29288	0.266802	0.398653	0.391785	0.260669	0.317845	0
MSTRG.48487	NAT-lncRNA	III	LOC105035794	0 < FPKMmax < 1	5.82827	0.483886	0	0	0	0	0	0.235131	0	0	0	0	0	0.587155	0.557701	5.82827	0	0	0	0	1		0	0	0	0	0	0	0.120887	0	0	0	0	0	0	0	0.483886	0	0.126837	0.173614	0
MSTRG.48560	NAT-lncRNA	IV	LOC109505170	-0.0965077	2250.78	50790.1	2250.78	0	0.243411	0	0	0	0	0.0404279	0	0.248845	0.1411	0.326375	0.222875	15.8346	0.789063	0	0	0.866529	2		2250.78	670.589	1333.27	128.305	0	0	0	263.758	44.7106	5068.61	6333.34	6493.64	3787.73	3762.15	42646.1	7662.73	10410.7	50790.1	15
MSTRG.49416	NAT-lncRNA	IV	LOC105036058	not available	0	0	0	0	0	0	0	0	0	0	0	0	0	0	0	0	0	0	0	0	0		0	0	0	0	0	0	0	0	0	0	0	0	0	0	0	0	0	0	0
MSTRG.52990	NAT-lncRNA	II	LOC105037020	0 < FPKMmax < 1	16.6299	0.108555	11.9131	1.29673	6.93666	3.322	3.41236	10.5849	16.6299	5.94293	5.40437	3.9545	2.91592	3.64694	2.24027	2.73119	0.753564	1.55893	0.499827	0.928764	15		0	0	0	0	0	0	0	0	0	0	0	0	0	0	0.108555	0	0	0	0
MSTRG.314	NAT-lncRNA	V	LOC105051257	0.0773644	1.19126	3.43349	1.19126	0	0.0385152	0.501514	0.742095	0	0	0	0	0	0	0	0	0	0	0	0	0	1		1.19126	1.23292	0.142598	1.42064	2.01875	0.586479	0.110597	2.04937	0.402512	0.765825	1.64684	1.32858	0.903056	0.335266	1.77716	3.04737	3.43349	1.11637	11
MSTRG.339	NAT-lncRNA	VI	LOC105053482	0 < FPKMmax < 1	4.7914	0.493287	4.7914	0	0	0	0	0.547073	1.03354	0.424533	0	1.3912	0.246739	0.370573	0.768369	0	0	0	0	0	3		0.167443	0	0	0	0	0	0	0	0	0.134575	0.131034	0.0816091	0	0.103804	0.493287	0.110581	0	0	0
MSTRG.449	NAT-lncRNA	VI	LOC105060069	0 < FPKMmax < 1	19.7862	0.111299	1.34837	3.30336	0.117617	0	0.478485	0	0.116743	0	0	0	0	0	0	19.7862	0.0795334	0	0	0.0858585	3		0	0	0.111299	0	0	0	0	0	0.0335582	0	0	0	0	0	0	0.0636811	0	0	0
MSTRG.952	NAT-lncRNA	VI	LOC105040870	0.696485	29085	29085	23471.2	0	0	16.2909	17.925	0	0	0	0	0	0	0	0	29085	0	0	0	0	4		23471.2	6006.81	4321.49	210.501	186.16	1857.13	1424.13	9202.18	6482.59	26379.2	6939.3	14782.9	15440	29085	3256.62	3232.42	1706.27	616.72	18
MSTRG.1416	NAT-lncRNA	V	LOC105043239	0 < FPKMmax < 1	9.71252	0.654506	0	0	0	0	0	0	0	0	0	0	0	7.42843	0	9.71252	0	0	0	0	2		0	0.646824	0	0	0.654506	0	0	0	0	0.215515	0	0	0	0	0	0	0	0	0
MSTRG.1427	NAT-lncRNA	VI	LOC105043191	-0.0957715	8.52573	5.86013	0	0.120477	0	8.52573	5.41607	0.157153	0.706022	0	0	0	0	0	0	0.919992	0	0	0	0	2		0	0	0	0	0	0	0	0	0	0	0	0	0	0	0	0	0	5.86013	1
MSTRG.1562	NAT-lncRNA	V	LOC105049440	0.00189322	1.39276	7.63256	1.39276	0	0	0	0	0	0	0	0	0	0	0	0	0.0826149	0	0	0	0	1		1.39276	1.39971	7.63256	0.357252	0.213924	2.64039	5.17191	0.0769801	0.0773287	0	0.0343755	0.0523148	0.075402	0.0338016	0.383083	1.37011	1.9515	0.572242	7
MSTRG.1825	NAT-lncRNA	VI	LOC105046747	0 < FPKMmax < 1	3.1857	0.430323	0.913359	1.46999	0	1.27704	3.1857	0.344882	0.627842	0.979017	1.27583	1.12159	0.959171	0	2.2014	0	0.989208	2.13512	2.25194	0.810447	8		0	0.430323	0	0.0986358	0	0	0	0	0	0	0	0	0	0	0.146889	0	0.0361465	0	0
MSTRG.1825	NAT-lncRNA	V	LOC105046722	0 < FPKMmax < 1	50.1213	0.430323	7.19056	15.3823	3.15766	38.8976	17.093	9.95314	11.8107	24.4601	21.6302	23.4051	14.3758	14.7001	17.2461	50.1213	11.2719	16.1767	17.8261	4.61086	18		0	0.430323	0	0.0986358	0	0	0	0	0	0	0	0	0	0	0.146889	0	0.0361465	0	0
MSTRG.2400	NAT-lncRNA	VI	LOC105051626	0 < FPKMmax < 1	25.0357	0.703027	1.47691	3.30769	1.64842	24.6016	25.0357	2.22103	2.04282	7.00701	6.72346	3.5289	5.13556	3.55551	6.97196	5.86169	2.6248	3.86051	5.96832	2.26797	18		0	0.462329	0.0577965	0.396571	0.703027	0	0.176201	0	0	0.228014	0	0.0677938	0	0	0.118858	0.202857	0.0922849	0	0
MSTRG.2810	NAT-lncRNA	V	LOC105054520	-0.134122	92.7993	1.25825	36.1622	39.7309	26.7794	19.4968	19.6369	31.7759	31.803	41.0728	35.2675	47.9845	31.4024	30.3655	38.9492	4.02616	53.3188	51.2435	92.7993	35.7643	18		0.910931	1.25825	0.440816	0.51779	0	0.0855376	0.483168	0.160657	0.167664	0	0	0.0736639	0.190208	0.276864	0	0.222274	0.101276	0	1
MSTRG.2876	NAT-lncRNA	V	LOC105054948	not available	47.2174	0	0	0	0.746942	0	0	0	0	0	0	0	0	0	0	47.2174	0	0	0	0	1		0	0	0	0	0	0	0	0	0	0	0	0	0	0	0	0	0	0	0
MSTRG.2883	NAT-lncRNA	VI	LOC105055004	0.286764	42.4284	4.04883	29.0103	21.8528	24.7003	23.9985	21.319	36.0799	34.0476	24.6106	27.6875	42.4284	18.441	21.4665	30.2961	0.111757	19.4755	40.3003	17.2879	16.1919	17		0.814286	1.10172	1.7685	1.98121	2.79088	3.99986	4.04883	0.258043	0	0	0.112744	0.476698	0	0.111757	0	0.191445	0	0	6
MSTRG.3383	NAT-lncRNA	V	LOC105058624	0.15504	1.09028	3.7831	0.357124	0.348063	0	0.580372	0	0	0	0.513223	1.09028	0	0.15523	0.139652	0	0.686454	0.407503	0.505004	0.589996	0.603248	1		0.357124	0.329982	2.85707	0	1.11479	0	0	2.09117	3.7831	0.160437	2.11355	0.625054	2.52237	0.398569	0.173493	0.670603	0.547668	0	6
MSTRG.3535	NAT-lncRNA	V	LOC105060195	not available	0.107737	0	0	0	0	0	0	0	0	0	0	0	0	0	0	0.107737	0	0	0	0	0		0	0	0	0	0	0	0	0	0	0	0	0	0	0	0	0	0	0	0
MSTRG.3706	NAT-lncRNA	V	LOC105060176	0 < FPKMmax < 1	20.0416	0.47787	7.70097	4.14183	20.0416	4.27793	5.60025	9.6652	8.36062	6.30399	7.13048	4.16711	5.95415	3.2033	5.94173	0	2.45005	4.98595	2.15493	2.69983	17		0	0.2247	0	0	0	0	0	0	0	0	0	0	0.47787	0.354612	0	0	0	0	0
MSTRG.4042	NAT-lncRNA	VI	LOC105032496	0.843593	10.6496	3.14198	0.255744	0.252325	4.26503	9.85284	10.6496	2.85038	2.12872	1.03103	1.75506	1.98846	1.8623	1.87392	1.49684	0	2.64937	0.193804	4.22244	1.27693	14		0	0	0	1.35879	3.14198	0	0	0.378143	0	0.278695	0	0	0	0	0	0	0	0	2
MSTRG.4063	NAT-lncRNA	VI	LOC105032708	0 < FPKMmax < 1	0.931933	1.00663	0	0	0	0	0	0	0	0	0	0	0	0	0	0	0	0	0.499401	0.931933	0		0	0	0	0	0.389084	0	0.122368	0	0.554714	0.819047	1.00663	0	0	0.273887	0	0.494701	0.319921	0	1
MSTRG.4453	NAT-lncRNA	V	LOC105034547	0 < FPKMmax < 1	8.7278	0.924141	3.34426	0	0	0	0	7.26176	7.07467	3.43392	3.56637	3.958	2.14827	3.11584	3.44815	8.7278	2.83512	0	5.32064	0	12		0	0.190817	0	0	0	0	0	0	0	0.292786	0	0	0	0	0.415492	0.924141	0.378195	0.511875	0
MSTRG.5324	NAT-lncRNA	VI	LOC105038282	0 < FPKMmax < 1	0.575707	0.919774	0.575707	0	0	0.554465	0	0	0	0	0	0	0	0	0	0	0	0	0	0	0		0.575707	0	0.30588	0	0.24378	0.270016	0.306582	0.853464	0.582379	0.345038	0.335588	0.361336	0.803627	0.569823	0.78353	0.662422	0.919774	0.06511	0
MSTRG.5533	NAT-lncRNA	VI	LOC105038417	0.184637	42.654	1.0282	28.3486	32.2729	22.9847	42.654	39.1996	18.7855	23.7793	10.6096	15.7084	31.6073	11.723	11.8129	24.3626	23.4022	2.65415	0	4.4663	0	16		0.102563	0.229514	1.0282	0.905902	0	0.255	0	0.621733	0.43759	0.174594	0	0.19066	0.444705	0.10596	0.15348	0.30495	0.201523	0.134399	1
MSTRG.6066	NAT-lncRNA	VI	LOC105038837	-0.0469779	16.3765	3.15797	0	3.26428	0.0758126	2.73389	2.21987	2.27848	2.22724	4.98479	1.33178	13.7995	3.50813	2.65955	2.56	0	16.3765	0.0957594	12.5039	0.197554	13		0	0.293745	0	3.15797	1.19051	0	0	0	0	0	0	0	0	0	0.236644	0	0	0	2
MSTRG.6151	NAT-lncRNA	VI	LOC105038885	0 < FPKMmax < 1	16.4204	0.30308	0	3.93766	1.71075	7.78688	4.31017	9.2913	6.84615	8.66753	6.0347	7.25712	3.83852	4.49783	4.45691	16.4204	2.69113	6.77755	5.52704	4.63296	17		0	0	0	0	0	0	0	0.0395371	0	0	0	0	0	0	0	0	0	0.30308	0
MSTRG.6678	NAT-lncRNA	VI	LOC105039228	0 < FPKMmax < 1	2.63305	0.426207	0.0479586	0	0	0	0	0	0	0	0	0	0	0.214961	0	0.377174	0.448188	0.603296	2.63305	0	1		0	0	0	0.426207	0.148804	0	0	0	0	0	0	0	0	0	0.190058	0	0	0.381386	0
MSTRG.7095	NAT-lncRNA	VI	LOC105039431	not available	179.937	0	53.9876	13.8708	179.937	20.9009	14.0435	12.8667	17.2616	46.9049	58.2223	57.7916	55.8824	56.578	60.6895	0	16.9972	32.8303	61.175	20.5598	17		0	0	0	0	0	0	0	0	0	0	0	0	0	0	0	0	0	0	0
MSTRG.7095	NAT-lncRNA	V	LOC105039433	not available	9.57816	0	0.682153	1.35036	0	1.71121	0	4.26616	7.66094	1.28072	9.57816	3.01886	1.19749	4.58742	5.76031	0	3.67432	1.5185	5.60174	1.63299	14		0	0	0	0	0	0	0	0	0	0	0	0	0	0	0	0	0	0	0
MSTRG.7206	NAT-lncRNA	VI	LOC105039732	0 < FPKMmax < 1	1.4761	0.669308	0	0	0.0785516	0	0	0	0	0	0	0	0	0	0	1.01427	1.4761	1.26876	0	0	3		0	0	0	0	0	0.0724269	0.111064	0	0.484024	0.40637	0	0	0	0.669308	0.360672	0	0	0.241498	0
MSTRG.7564	NAT-lncRNA	V	LOC105040044	not available	0	95.333	0	0	0	0	0	0	0	0	0	0	0	0	0	0	0	0	0	0	0		0	16.0359	0	95.333	86.4134	0	0	0	0	0	0	0	0	0	0	0	0	0	3
MSTRG.7564	NAT-lncRNA	VI	LOC105039877	0.985558	1.36901	95.333	0.100347	0.120756	0.135573	1.36901	1.34675	0.120398	0.203372	0	0	0	0	0	0	0	0	0	0	0	2		0	16.0359	0	95.333	86.4134	0	0	0	0	0	0	0	0	0	0	0	0	0	3
MSTRG.8192	NAT-lncRNA	VI	LOC105040321	not available	75.1245	0	36.1498	17.429	38.956	43.9076	49.9494	29.3994	25.4353	42.4033	62.9971	46.2248	50.3265	42.1721	75.1245	1.25994	15.2608	25.6152	31.8054	8.19182	18		0	0	0	0	0	0	0	0	0	0	0	0	0	0	0	0	0	0	0
MSTRG.9556	NAT-lncRNA	V	LOC109505632	not available	892.849	0	892.849	748.786	29.5972	1.9454	7.28244	0.291112	0.497099	1.61056	0.442004	82.9479	1.11068	0.70448	1.50158	18.0583	5.21235	1.12913	5.03186	0	13		0	0	0	0	0	0	0	0	0	0	0	0	0	0	0	0	0	0	0
MSTRG.10383	NAT-lncRNA	V	LOC105041976	0.647036	53.7179	3.90334	0	23.7956	20.1117	30.3372	28.3106	30.2649	34.9523	25.1257	34.113	20.1084	20.0063	15.8887	21.3121	0.14563	20.2409	53.7179	53.4459	18.566	16		0	0	0	1.94106	0.135566	1.27753	1.63209	0	0	0.505971	0	0.663861	0.734022	0	1.07382	3.90334	1.25032	1.28721	7
MSTRG.10432	NAT-lncRNA	V	LOC105042009	not available	17.8445	0	12.1298	9.59774	1.63188	0	6.78685	11.0589	14.6899	15.6465	7.97274	8.81358	11.6155	6.93616	13.2569	11.8143	0	0	17.8445	4.92311	15		0	0	0	0	0	0	0	0	0	0	0	0	0	0	0	0	0	0	0
MSTRG.10957	NAT-lncRNA	V	LOC105042354	not available	1.35283	0	0.270206	0.779594	0	0.870127	0	0	0	0.627007	0.589069	1.35283	0.351618	0.888897	0.297214	0	0.745384	0	0.26851	0	1		0	0	0	0	0	0	0	0	0	0	0	0	0	0	0	0	0	0	0
MSTRG.11331	NAT-lncRNA	V	LOC109505773	0 < FPKMmax < 1	0.343926	5.50228	0	0.102141	0	0	0	0	0	0.0472141	0.0345068	0.343926	0.12799	0.0905095	0.195967	0	0	0.131217	0	0	0		0	0	0	4.9931	5.50228	0	0	0.79725	1.00727	0	1.1097	0	1.0213	0	0	0	0	0	5
MSTRG.11474	NAT-lncRNA	V	LOC105042558	0 < FPKMmax < 1	3.16589	0.223107	2.68824	2.00112	2.17081	2.13596	2.16183	1.94576	0.862595	2.60781	1.60755	3.16589	0.988023	1.06875	2.06483	0.323545	0.84037	0.29926	1.54104	0.0349519	12		0	0	0	0.223107	0.0548463	0	0	0	0.0365017	0	0	0	0.0829092	0	0	0.139374	0.0630828	0	0
MSTRG.12384	NAT-lncRNA	VI	LOC105043126	-0.0133559	14.5055	1.27012	4.16337	0	0	6.51898	7.5544	4.94295	0	0	10.9702	0	0	4.68545	0	10.1143	6.01106	6.92606	14.5055	3.38846	11		0	1.25291	0.234981	1.12834	1.27012	0.0794224	0	0.200429	0.104593	0.521084	0.130001	0.550974	0.2967	0.711996	0	0	0	0	3
MSTRG.12524	NAT-lncRNA	VI	LOC105043270	0 < FPKMmax < 1	130.764	0.206557	0.59193	2.13189	1.75763	67.1795	124.347	65.1344	130.764	1.09459	0.61887	2.21377	1.18175	0.438376	1.0266	0	0.109165	0	0	0.470885	10		0	0	0	0	0.206557	0	0	0	0	0	0	0	0	0	0	0	0	0	0
MSTRG.12655	NAT-lncRNA	V	LOC105043335	0.905595	1.28733	53.0471	0	0	0	1.28733	0.231103	0	0	0	0	0	0	0	0	0	0	0	0	0	1		0	0	0	53.0471	36.2072	0	0	0.799943	0	0.649328	0	0	0	0	0	0	0	0	2
MSTRG.12777	NAT-lncRNA	VI	LOC105043557	0 < FPKMmax < 1	26.6972	0.118648	2.05121	3.25155	1.83285	5.70289	3.76821	2.11334	2.87331	4.55412	4.77513	4.81425	2.31836	3.14403	4.79232	26.6972	1.10034	1.40826	1.48406	0.308391	17		0	0	0	0.0548284	0.107623	0	0	0	0	0	0	0	0	0	0.118648	0	0.0299939	0.0855125	0
MSTRG.13309	NAT-lncRNA	VI	LOC105043822	0 < FPKMmax < 1	51.8065	0.257416	4.98363	7.55446	8.01434	51.8065	14.8341	7.71472	11.1124	15.4542	6.93855	15.8522	18.831	4.84474	12.8087	0	0	2.45668	10.6227	2.66495	16		0	0.257416	0	0	0	0	0	0	0	0	0	0	0	0	0	0	0	0.18748	0
MSTRG.13625	NAT-lncRNA	V	LOC105044080	-0.148993	398.82	2.17256	194.246	398.82	9.39771	0.646781	1.49816	0.74783	0.39549	0.90056	0.667341	18.8467	6.3303	5.68325	1.792	0.905397	0.608051	0	0.258309	0	8		0	0.240506	0.190454	0	0	0.528972	0.265038	0	0.19964	0	0.140084	0.160356	0	0.112854	2.17256	1.11556	1.08967	0.759328	3
MSTRG.13684	NAT-lncRNA	V	LOC105044138	not available	450.694	0	130.621	152.787	450.694	97.6146	135.759	324.335	325.276	126.846	131.909	83.2241	100.435	80.147	121.75	0	18.8963	27.2531	30.1177	12.215	17		0	0	0	0	0	0	0	0	0	0	0	0	0	0	0	0	0	0	0
MSTRG.13766	NAT-lncRNA	VI	LOC105044253	-0.0828708	3.53073	1.96352	0.991693	3.53073	0	0.121908	0.0239245	1.0001	0.942589	0.185321	0.927503	0.0357373	0	0.0210641	0	1.64458	0.0350979	0.0295549	0.0265833	0.03795	3		0	0	0	0	0	0	0	0	0	0	1.1438	1.21563	1.96352	1.32367	0	0	0	0	4
MSTRG.14178	NAT-lncRNA	VI	LOC105044497	0.220944	66.2352	1.0647	12.4392	14.6007	66.2352	25.7879	39.7049	35.5421	39.0052	28.6006	45.7804	44.0848	28.4017	26.0008	45.0153	0	8.30902	11.3382	28.9749	13.2722	17		0	0	0.099218	1.0647	0.708197	0.161636	0.217658	0.130092	0.249079	0	0	0.0888426	0.411775	0.0278799	0.0995927	0.126089	0.189395	0.0538143	1
MSTRG.14643	NAT-lncRNA	VI	LOC105044884	0 < FPKMmax < 1	31.0733	0.598727	14.558	14.278	7.72808	22.95	15.5775	27.9393	27.9507	22.3243	15.9808	31.0733	11.2263	15.961	20.4522	0	0	0	13.3779	4.25371	15		0	0	0	0	0.381051	0	0	0.0786778	0	0	0	0	0	0	0.598727	0	0.158675	0	0
MSTRG.14862	NAT-lncRNA	VI	LOC105045033	-0.191616	18.3433	1.14372	18.3433	9.64836	15.6594	7.34225	7.01326	12.7211	0	14.7268	17.9732	9.70116	8.92245	9.08356	12.0788	4.41144	10.6235	9.23528	13.0053	5.84514	17		0	0	0	1.14372	0.383236	0	0	0	0	0	0	0	0.249321	0	0	0	0	0	1
MSTRG.15044	NAT-lncRNA	VI	LOC105045199	0 < FPKMmax < 1	15.6229	0.813028	4.00375	15.6229	0	0	0	0.0726925	0	0	0	0.0560906	0	0.331364	0	0.0446938	0	0.661536	0	0	2		0	0.10731	0.0401246	0	0	0	0	0.32945	0.253491	0.401024	0	0.190045	0.534655	0.0446938	0	0.345473	0.813028	0.800108	0
MSTRG.15044	NAT-lncRNA	V	LOC105045203	0 < FPKMmax < 1	102.007	0.813028	19.0744	0	62.1793	2.46781	2.69068	28.7504	27.6536	0	0	102.007	62.3269	50.5131	0	0	27.9135	68.6973	45.344	48.2851	13		0	0.10731	0.0401246	0	0	0	0	0.32945	0.253491	0.401024	0	0.190045	0.534655	0.0446938	0	0.345473	0.813028	0.800108	0
MSTRG.15276	NAT-lncRNA	VI	LOC105045315	0 < FPKMmax < 1	1.72191	0.144563	1.50762	1.72191	0.157936	0.629583	0.564172	0.435062	0.889509	0.519627	0.994992	0.320633	0.779053	0.5436	0.740398	0	0	1.33102	1.58722	0.512293	4		0	0.117423	0	0	0	0.144563	0	0	0	0	0	0	0	0	0	0.0603817	0	0	0
MSTRG.15551	NAT-lncRNA	VI	LOC105045458	not available	45.2735	0	29.5408	12.523	38.8176	9.12785	15.1822	22.5641	28.9728	19.0918	33.7564	9.10541	10.7832	45.2735	17.7747	0	9.82743	31.982	17.3266	21.7373	17		0	0	0	0	0	0	0	0	0	0	0	0	0	0	0	0	0	0	0
MSTRG.15551	NAT-lncRNA	V	LOC105045461	not available	3.01431	0	0	0	0	2.34995	0	0	0	2.33329	3.01431	0	0	0	2.15237	0	1.58803	0	0	0	5		0	0	0	0	0	0	0	0	0	0	0	0	0	0	0	0	0	0	0
MSTRG.15801	NAT-lncRNA	VI	LOC105046145	-0.12112	2.91983	1.73158	0	0	0	2.91983	0	0	0	0	0	0	0	0	0	0	0	0	0	0	1		0	0	0	0	0	0	0	0	0	0.997727	0.782986	0	1.73158	0	0	0.897699	0	0	1
MSTRG.16002	NAT-lncRNA	VI	LOC105046019	0.103183	34.9226	4.35198	1.24745	7.36045	0.974695	34.3997	34.9226	7.082	8.68838	1.68834	2.37299	1.23889	0	0.266715	0	0	0.151909	2.89686	0.716115	2.21415	11		0	1.60669	0.110418	1.8695	1.03596	0	0	1.36383	0.853256	0.314689	0.596723	1.13499	0.858568	0.65024	4.35198	0.817453	1.13311	1.01045	8
MSTRG.16344	NAT-lncRNA	VI	LOC105046163	0 < FPKMmax < 1	9.5129	0.320545	0.516157	0.232534	0.350535	0.5966	0.353493	0.489581	0.972448	5.05435	6.18941	9.5129	1.05228	8.70363	3.03057	0	8.28518	5.87375	3.49788	1.18816	10		0.320545	0	0	0	0	0	0	0	0	0	0	0	0	0	0	0	0	0	0
MSTRG.16350	NAT-lncRNA	VI	LOC105045799	-0.0976555	232.836	1.36021	12.9349	47.4906	31.821	8.77239	16.3105	184.156	232.836	32.2238	49.1809	16.3255	15.5226	13.9558	31.7053	0	30.9436	66.4001	79.5503	47.7386	17		0	0.116487	0	0	0	0	0	1.36021	0	0	0.693378	0	0	0	0.650209	1.21507	0	0.932726	2
MSTRG.16541	NAT-lncRNA	V	LOC105045653	not available	2.27527	0	0	0	0	0	2.27527	1.11432	0	0	0	0	1.33661	0	0	0	0	0	0	0	3		0	0	0	0	0	0	0	0	0	0	0	0	0	0	0	0	0	0	0
MSTRG.16541	NAT-lncRNA	VI	LOC105045651	not available	10.0678	0	4.51297	3.18798	0.629866	3.31568	2.37782	2.02723	4.71091	9.8106	7.64973	10.0678	7.34718	6.60035	7.84747	0	3.20771	8.4352	8.60412	4.12529	16		0	0	0	0	0	0	0	0	0	0	0	0	0	0	0	0	0	0	0
MSTRG.17400	NAT-lncRNA	VI	LOC105046801	0 < FPKMmax < 1	4.23094	0.130351	0	0.363829	4.23094	2.0311	0.907197	0.0980456	0.141232	0.128447	0.139758	0.108377	0.0228998	0.054724	0.0635688	0	0.180382	0.0254985	0	0	2		0	0	0	0	0	0.0902024	0.130351	0	0	0	0	0	0.0563878	0	0	0	0	0	0
MSTRG.17988	NAT-lncRNA	V	LOC105047102	0 < FPKMmax < 1	0.378768	4.18168	0.378768	0.144978	0	0	0	0	0	0.0633074	0	0.109763	0	0	0	0.0177148	0.0905653	0.0625202	0	0	0		0	4.18168	0	0	0	0	0	0	0	0	0.183141	0.393682	0	0	0	0	0	0	1
MSTRG.18286	NAT-lncRNA	VI	LOC105047326	0 < FPKMmax < 1	8.51838	0.26497	0.160435	0.149389	8.51838	2.64241	2.4464	3.10253	3.41777	0.863005	0.966068	0.552608	0.593072	0.282322	0.83173	0	0.0741509	3.56041	1.04254	0.313215	7		0	0.0653223	0.0243594	0	0.26497	0.0317322	0	0	0	0	0	0	0	0	0	0	0	0	0
MSTRG.18545	NAT-lncRNA	VI	LOC105047547	-0.133029	26.5192	2.18334	0	0	2.74242	0	8.81314	2.18404	2.23837	0	26.5192	0	0	0	2.88491	10.9635	1.65846	0	0	1.25351	9		0	0	0	2.18334	0	1.19797	0	0	0	0	0	0	0	0	0	0	0	0	2
MSTRG.18979	NAT-lncRNA	VI	LOC105047875	not available	34.3419	0	14.2844	15.6966	2.96151	34.3419	28.277	9.22834	10.6297	19.444	22.5815	23.2344	16.1014	14.1187	21.0388	9.05199	10.1972	21.141	24.8753	12.8269	18		0	0	0	0	0	0	0	0	0	0	0	0	0	0	0	0	0	0	0
MSTRG.19769	NAT-lncRNA	VI	LOC105048496	not available	65.8396	0	29.0161	9.36541	46.5463	23.6174	24.1866	12.4329	16.243	58.3287	42.7188	65.8396	51.0799	56.2485	52.9853	0.425158	12.8323	41.2362	18.5801	9.10269	17		0	0	0	0	0	0	0	0	0	0	0	0	0	0	0	0	0	0	0
MSTRG.20128	NAT-lncRNA	VI	LOC105048642	-0.167417	4.25324	1.07403	0	0	4.25324	0	0	0	0	0	0	0	0	0	0	0.799474	0	0	0	0	1		0	1.07403	0.0333328	0.601331	0.953089	0.150745	0.120665	0.0879332	0.0459236	0	0	0.0999304	0.0174055	0	0.332635	0.0280021	0.125902	0.179844	1
MSTRG.20275	NAT-lncRNA	VI	LOC105048820	0 < FPKMmax < 1	231.173	0.467841	213.208	231.173	51.3882	44.4396	65.3501	54.1471	60.6658	79.5271	108.454	87.2188	119.541	179.259	188.269	0	48.0929	71.6212	136.194	32.8431	17		0	0.467841	0.11798	0	0	0	0	0	0	0	0	0	0	0	0	0	0.407036	0	0
MSTRG.20302	NAT-lncRNA	VI	LOC105048842	0 < FPKMmax < 1	132.834	0.741646	81.0194	132.834	90.6481	38.848	46.5571	90.9527	81.065	129.207	132.487	129.622	90.0574	76.8634	76.212	1.23251	50.11	111.69	110.365	42.3201	18		0.235489	0.35342	0.741646	0.582336	0.358296	0.427012	0.321019	0.181488	0.663028	0.419491	0.235109	0.24919	0.268763	0.292826	0.108555	0	0	0	0
MSTRG.20449	NAT-lncRNA	VI	LOC105049008	0.274556	164.958	2.37867	51.6303	33.9097	38.0445	4.02978	4.29769	75.3068	83.7912	77.3542	108.311	57.6479	29.4038	32.5491	43.5592	8.16738	131.742	164.958	88.3025	48.8441	18		0	0	0	0	0	0	0	0	2.37867	0	0	0	0	0	0	0	0	0	1
MSTRG.20862	NAT-lncRNA	VI	LOC105049180	0 < FPKMmax < 1	58.0726	0.126519	11.891	58.0726	4.22092	48.7029	28.4762	26.8383	42.3865	47.425	45.7018	46.9601	11.8352	40.0156	23.4521	0	0	0	0	0	13		0	0	0	0	0	0	0	0	0	0	0	0	0	0	0	0.126519	0	0	0
MSTRG.21178	NAT-lncRNA	VI	LOC105049432	0 < FPKMmax < 1	13.3436	0.342764	5.05915	7.47528	2.51784	4.02632	2.22489	11.6462	10.8763	4.6263	5.47295	4.93951	4.62156	2.86922	4.53433	0	7.46729	13.3436	9.59646	2.95266	17		0	0	0	0.208953	0.342764	0.203649	0.229553	0	0.136093	0	0	0.119291	0.257472	0	0	0	0.32038	0.111773	0
MSTRG.21376	NAT-lncRNA	VI	LOC105049564	0 < FPKMmax < 1	14.2746	0.873144	9.72823	11.2386	1.03529	14.2746	14.2042	10.0344	14.119	9.17407	9.15943	12.448	7.62148	9.76785	12.3266	2.94111	8.88211	12.8818	11.2305	5.08067	18		0	0	0	0	0.349015	0	0	0	0	0.0856204	0.14357	0.253752	0	0.190936	0.873144	0.518955	0.537267	0.376927	0
MSTRG.21552	NAT-lncRNA	VI	LOC105049669	not available	0	8.22549	0	0	0	0	0	0	0	0	0	0	0	0	0	0	0	0	0	0	0		0	2.12023	0	0	0	0	0.840507	8.22549	0	0	0	0	0	0	0	0.976387	3.52356	1.13845	4
MSTRG.21756	NAT-lncRNA	VI	LOC105049796	0.747944	7.44744	3.52073	0.058725	1.38563	0.0530161	7.44744	3.3867	0.24227	0.582736	5.64672	4.2052	0.695985	1.25114	1.20152	1.42823	5.52583	3.19691	0.835706	1.17658	2.36052	12		0	0.663241	0.019008	2.10886	0.72436	0.123107	0.110409	3.52073	2.09134	0.521246	0.36446	0.432538	0.237764	0.343015	0.684015	0.70431	0.316872	0.575183	3
MSTRG.21847	NAT-lncRNA	V	LOC105049856	not available	11.0756	0	0.54489	0.934764	0	11.0756	9.22568	2.03952	2.48391	1.37358	0.96687	0.276405	0.440988	0.407239	1.31212	0	0.237318	3.73735	1.43746	0.696522	8		0	0	0	0	0	0	0	0	0	0	0	0	0	0	0	0	0	0	0
MSTRG.21939	NAT-lncRNA	VI	LOC105049921	0 < FPKMmax < 1	79.7937	0.814627	79.7937	3.706	64.0976	1.37481	0.626037	13.9031	5.2094	28.4317	33.3379	5.19608	2.46391	10.3423	7.09618	0	0.16163	7.91588	0.762675	5.91506	14		0	0	0	0	0	0	0	0	0	0	0	0	0	0	0	0	0	0.814627	0
MSTRG.21976	NAT-lncRNA	VI	LOC105049945	0 < FPKMmax < 1	1.5371	0.175836	0	0.428616	0.352953	0.908789	0.726608	0.45505	0.219157	0.474943	0.482495	0.511717	0.318826	0.446146	0.395248	1.5371	0	0	0.53612	0.951724	1		0	0.111381	0	0	0	0	0	0	0	0.0811814	0	0	0	0	0.175836	0	0	0	0
MSTRG.22449	NAT-lncRNA	VI	LOC105050290	-0.203513	8.3899	3.12078	5.82582	8.3899	1.10553	0	0.217433	6.74795	4.44114	0	0	0	0	0	0	0.72047	0.570482	0.548175	0.349059	0.966045	5		0	0	0.134099	3.12078	0	0	0	0	0	0	0	0	0	0	0.833009	0	0.650673	0	1
MSTRG.22518	NAT-lncRNA	V	LOC105050340	0.141128	14.7376	6.51283	5.32359	1.02727	1.14933	6.27347	8.91465	1.02272	0.836282	8.05275	8.15887	6.80524	7.83773	5.6966	14.7376	13.2212	3.40525	7.71195	10.3335	2.72252	17		0	1.43447	0	0	6.51283	0	0	0	1.43446	0	0	0	0	0.458814	0	0	0	0	3
MSTRG.22620	NAT-lncRNA	VI	LOC105050400	0 < FPKMmax < 1	10.3749	0.364003	1.61733	1.98138	0.838053	9.33653	3.84985	0	1.92202	5.16961	10.3749	2.75313	2.89601	0.542007	7.24756	1.71176	0	1.0359	6.6212	2.12572	14		0	0	0	0	0	0	0	0	0	0	0	0	0.364003	0	0	0	0	0	0
MSTRG.22961	NAT-lncRNA	VI	LOC105050692	-0.0488992	63.5812	19.5582	46.6865	63.5812	5.88657	7.89451	19.5256	0	5.60001	31.9503	27.6132	30.9086	3.13492	23.892	21.8499	39.4934	0	4.08385	8.81106	0	15		0.295532	0	0.331855	17.6289	19.5582	1.08591	0	6.67024	0	3.44737	0	0	7.93103	0	0	2.70404	0.321741	0	7
MSTRG.23019	NAT-lncRNA	VI	LOC105050732	0 < FPKMmax < 1	87.6065	0.994508	56.3916	32.7546	14.1162	34.5959	50.2246	28.3466	30.783	57.653	85.5127	46.4837	87.6065	53.0091	72.7004	0	29.6789	20.8489	81.8878	28.7748	17		0	0.994508	0	0	0.335419	0	0	0	0	0	0.256961	0	0	0	0	0	0	0	0
MSTRG.23329	NAT-lncRNA	VI	LOC105050969	0.085837	216.787	10.8289	22.944	3.06302	121.554	5.25414	8.75797	60.9046	116.838	7.33663	4.56281	31.4707	216.787	69.2097	55.7604	4.32059	60.2717	77.9846	61.9071	6.27449	18		3.67853	5.62062	5.80792	0	2.97952	4.5785	4.5434	2.57383	1.97199	5.40227	1.88063	3.52235	10.8289	4.32059	2.91719	2.59704	2.99189	0.96968	16
MSTRG.23513	NAT-lncRNA	VI	LOC105051029	0 < FPKMmax < 1	5.13556	0.15675	0	0	0.151737	4.88016	4.73915	3.36985	1.7154	2.92706	2.81826	5.13556	2.43621	4.45993	4.39138	0.740522	1.25256	2.91134	3.19454	1.02641	14		0	0	0	0	0	0	0	0	0	0	0	0	0	0	0.15675	0	0	0	0
MSTRG.23859	NAT-lncRNA	V	LOC105051275	0 < FPKMmax < 1	36.0014	0.426277	21.827	32.9634	36.0014	12.1311	12.1493	15.0649	12.9988	12.1957	18.6149	16.1769	9.37622	10.7278	12.9997	1.93308	8.62026	8.29141	8.92173	33.7965	18		0.0155328	0.113183	0.0983108	0.117021	0.0382632	0.108583	0	0.049495	0.0904761	0	0.0158788	0.0168658	0.0293966	0.015887	0.335734	0.0705985	0.0845859	0.426277	0
MSTRG.24267	NAT-lncRNA	VI	LOC105051532	0 < FPKMmax < 1	44.0205	0.0932226	39.2394	16.937	7.50958	6.11065	9.73132	4.62421	13.2293	42.6024	33.7433	34.6459	19.0679	11.1233	35.8398	17.0043	25.9228	23.812	44.0205	28.212	18		0	0	0	0	0	0	0	0.0381336	0.0932226	0	0	0	0	0	0	0.0168537	0	0	0
MSTRG.24390	NAT-lncRNA	VI	LOC105051913	not available	0.194596	0	0	0	0.145606	0	0.194596	0	0	0	0	0	0	0	0	0	0	0	0	0	0		0	0	0	0	0	0	0	0	0	0	0	0	0	0	0	0	0	0	0
MSTRG.24651	NAT-lncRNA	VI	LOC105051681	-0.29478	43.298	5.03166	11.3078	5.97017	7.9112	6.672	7.94358	9.79551	10.368	16.8217	18.0759	11.7248	9.96641	9.35127	14.2702	0.617202	13.9381	43.298	19.4651	10.9855	17		0.164738	5.03166	0.146674	0.98724	0	0.882686	0	0	0	0	1.09413	0.49458	0.556674	0.617202	0	0	0.45675	0.340607	2
MSTRG.24924	NAT-lncRNA	V	LOC105052099	0 < FPKMmax < 1	17.9985	0.213777	11.1778	6.05693	6.14487	12.0013	6.51571	0	17.9985	7.03568	8.94664	3.95233	6.60705	6.3534	7.15427	1.36527	4.22729	8.72877	7.00885	5.61458	17		0	0.213777	0	0	0	0.111478	0	0	0	0	0	0	0	0	0	0	0.132583	0	0
MSTRG.24924	NAT-lncRNA	VI	LOC105052097	0 < FPKMmax < 1	19.5154	0.213777	0	0	0	0	0	19.5154	0	0	0	0	0	0	0	15.5493	0	0	0	0	2		0	0.213777	0	0	0	0.111478	0	0	0	0	0	0	0	0	0	0	0.132583	0	0
MSTRG.25721	NAT-lncRNA	V	LOC105052611	not available	8.19538	0	0	1.50629	0.126173	0	0	0	0	0	0	0	0	0	0	8.19538	0	0	0	0	2		0	0	0	0	0	0	0	0	0	0	0	0	0	0	0	0	0	0	0
MSTRG.26099	NAT-lncRNA	VI	LOC105052909	0 < FPKMmax < 1	5.7794	0.279136	1.59905	5.7794	1.53554	2.53301	2.69579	0.967087	0	0	0	0	0	0	0	0	1.3011	1.30925	1.75106	0.683805	8		0	0	0	0	0	0	0	0	0.279136	0	0	0	0	0	0	0	0	0	0
MSTRG.27472	NAT-lncRNA	VI	LOC105054184	0 < FPKMmax < 1	27.0321	0.184986	22.1871	7.4866	3.64319	27.0321	22.1973	7.69849	9.60463	10.3481	6.62032	9.93571	7.53397	7.29147	9.77794	0	8.16192	13.3115	9.66005	3.64132	17		0	0	0.0602964	0	0	0.184986	0	0	0	0	0	0	0	0	0	0	0	0	0
MSTRG.27472	NAT-lncRNA	V	LOC105054367	0 < FPKMmax < 1	0.319043	0.184986	0	0	0	0	0	0	0	0	0	0	0	0	0	0	0	0.319043	0	0	0		0	0	0.0602964	0	0	0.184986	0	0	0	0	0	0	0	0	0	0	0	0	0
MSTRG.27906	NAT-lncRNA	V	LOC105054324	0.567635	1.22068	6.02173	0	0.155565	0.205392	1.22068	0.824219	0.938426	0.886552	0.815902	0.683948	0.408002	0.116307	0.590076	0.730011	0	0.476457	0.381358	0.509786	0.490862	1		0	0.920948	0	6.02173	2.45778	0.465291	0	0	1.8237	1.1186	0.847771	1.46675	2.31933	0	0	1.75116	1.4793	0.995366	8
MSTRG.28241	NAT-lncRNA	VI	LOC105054482	0 < FPKMmax < 1	121.759	0.342641	12.9497	15.9518	121.759	26.7114	10.4599	26.1915	22.5128	45.0202	83.3142	42.7535	53.4996	50.3441	25.7292	77.8848	14.6193	18.4288	70.4413	11.8313	18		0.0540177	0	0.0243896	0.0337745	0	0	0.213908	0	0.0222717	0	0.109747	0.0873762	0	0	0.342641	0	0	0.0528999	0
MSTRG.28241	NAT-lncRNA	V	LOC105054483	0 < FPKMmax < 1	79.9665	0.342641	1.42507	0.757277	79.9665	0.074469	0.219407	0.175727	0.118358	0.0469669	0	0	0	0.0320875	0	21.6263	0.108197	0.045692	0	0	3		0.0540177	0	0.0243896	0.0337745	0	0	0.213908	0	0.0222717	0	0.109747	0.0873762	0	0	0.342641	0	0	0.0528999	0
MSTRG.28862	NAT-lncRNA	VI	LOC105054909	0 < FPKMmax < 1	4.16804	0.897342	0	0	0	0	0.710371	1.33848	0	0	0	2.82547	0	1.71402	0	1.26609	0	0	0.76171	4.16804	5		0	0	0	0	0	0	0	0	0	0	0	0.526448	0	0	0	0	0	0.897342	0
MSTRG.28993	NAT-lncRNA	VI	LOC105054924	0 < FPKMmax < 1	45.972	0.982194	15.9049	45.972	12.3437	6.97234	3.90471	10.154	14.5301	22.5701	42.3238	17.0858	27.0398	16.5822	39.8517	0	7.5304	9.69299	35.2601	9.85535	17		0	0	0	0	0	0.982194	0	0	0	0	0	0	0.150697	0	0	0	0	0	0
MSTRG.29003	NAT-lncRNA	VI	LOC105054919	0.1337	2.11842	4.77679	2.11842	0	0.119021	0.0877253	0.2229	1.63754	1.19678	0	0	0	0.0993557	1.21437	0	1.16438	0.578281	0	0.69519	0.320716	5		1.9374	0	0.73364	2.30104	0	0	0	0	0	2.28968	1.79225	4.77679	0	1.16438	3.53464	2.32177	0	2.89633	9
MSTRG.29413	NAT-lncRNA	VI	LOC105055282	0 < FPKMmax < 1	31.6004	0.278718	0	0	0	6.72173	3.34774	0	0.053921	0	0	0	0	0	0	31.6004	0	0	0	0	3		0	0	0	0	0	0	0	0	0	0	0	0	0	0	0	0	0	0.278718	0
MSTRG.29443	NAT-lncRNA	VI	LOC105055363	0 < FPKMmax < 1	111.874	0.304064	0.28249	0	0.900326	111.874	51.7532	1.68585	0.785909	10.1491	2.96928	15.0558	2.28851	5.83133	11.9898	0	2.56485	2.00203	4.47745	0.724	12		0	0	0.0482365	0	0.0653053	0	0	0	0	0.0479161	0.0536418	0	0.0491269	0	0	0	0.304064	0.106263	0
MSTRG.29594	NAT-lncRNA	V	LOC105055539	not available	28.499	0	0	0	0	0	0	0	0	0	0	0	0	0	0	28.499	0	0	0	0	1		0	0	0	0	0	0	0	0	0	0	0	0	0	0	0	0	0	0	0
MSTRG.29653	NAT-lncRNA	VI	LOC109506462	0 < FPKMmax < 1	0.12465	0.984816	0	0	0	0	0	0	0	0	0	0.109422	0.12465	0	0	0	0	0	0	0	0		0	0.0723236	0	0.984816	0.733205	0	0	0.0463929	0	0	0	0	0	0	0	0.0947758	0.172279	0	0
MSTRG.29869	NAT-lncRNA	VI	LOC105055773	-0.241449	32.2419	1.21702	8.56946	5.53304	12.7631	22.1935	15.4045	16.2771	13.1507	29.957	0	28.3402	23.574	18.3305	32.2419	0	0	20.1234	24.4418	8.26548	15		0	1.21702	0	0	0	0	0	0	0	0	0	0	0	0	0	0	0	0	1
MSTRG.29910	NAT-lncRNA	VI	LOC105055742	0.0846832	15.8487	1.29114	15.8487	11.4651	4.7388	8.25224	5.01922	6.784	7.9206	5.08357	4.59099	3.06411	2.86862	2.78091	6.25945	0	1.6571	4.06085	2.23932	1.17032	17		0.826763	0	0	1.23078	0.735528	0	0	0.289846	0.30181	0.668094	0	0.609714	0.340546	0.379856	0	0	0	1.29114	2
MSTRG.30111	NAT-lncRNA	V	LOC105055885	not available	14.4225	0	8.78388	8.28505	3.15673	8.97147	5.29309	9.38049	11.0358	7.72564	6.84989	10.0693	4.82268	5.44091	7.81418	2.1688	6.07227	14.4225	6.62635	4.08083	18		0	0	0	0	0	0	0	0	0	0	0	0	0	0	0	0	0	0	0
MSTRG.30160	NAT-lncRNA	VI	LOC105055919	-0.000583008	81.2747	1.19304	18.7735	10.6375	6.02515	12.0957	9.57496	19.7534	30.6675	14.8062	18.8868	31.6786	14.3746	16.6639	25.2793	81.2747	16.591	27.7215	17.4551	7.8095	18		0	0.211084	0	0.354437	0.0267584	0.127438	1.13502	0.759118	0.378411	0.299411	0.332558	0.306038	0.471172	0.0886744	1.03121	1.19304	0.477198	0.579326	3
MSTRG.30272	NAT-lncRNA	V	LOC105056008	0 < FPKMmax < 1	2.53273	0.265597	1.34232	1.78581	0.0887602	0.461205	1.14697	0.922876	1.06751	0.485845	0.85246	0.629504	0.649714	0.583667	0.692147	0	0.889278	0.824939	2.53273	0.961216	5		0.0894328	0	0	0	0	0	0	0	0	0	0	0	0	0	0.151802	0.265597	0	0.186103	0
MSTRG.30272	NAT-lncRNA	VI	LOC105056010	0 < FPKMmax < 1	3.66489	0.265597	3.34507	0	0.261545	3.66489	2.94305	0.654995	2.46923	2.32582	0	1.49636	2.43368	1.08936	1.35969	0.622857	0	2.03666	2.19516	0.876867	11		0.0894328	0	0	0	0	0	0	0	0	0	0	0	0	0	0.151802	0.265597	0	0.186103	0
MSTRG.30600	NAT-lncRNA	V	LOC105056225	0 < FPKMmax < 1	28.5293	0.153247	8.4154	4.01876	0.385759	26.5498	28.5293	9.63017	7.51173	10.2605	6.26842	7.95172	8.10347	4.48911	8.87009	0	2.39394	2.86297	8.37245	2.54191	16		0	0	0	0	0	0	0.153247	0	0	0	0	0	0	0	0	0	0	0	0
MSTRG.30784	NAT-lncRNA	V	LOC105056337	0.255083	51.7851	3.61643	0	26.2669	46.4628	51.7851	0	10.9	9.43159	0	22.5994	19.6423	17.5679	17.8337	13.5587	0	0	3.55299	5.84737	0	12		0	1.65627	3.61643	0	0	0	0	0	2.29907	0	0	0	2.01274	0	1.83173	2.09835	1.96023	1.46555	8
MSTRG.30788	NAT-lncRNA	V	LOC105056359	0.0802523	1.85345	3.88629	1.85345	0	0	0	0.454394	0	0.133287	0.070738	0	0	0	0	0	0	0	0	0	0.190451	1		1.85345	0.741072	0.380872	0	0	0.855152	1.10554	3.88629	0	2.12974	2.73521	3.34658	2.30504	0	0.523643	0	0.798361	0	7
MSTRG.30878	NAT-lncRNA	VI	LOC109506528	0 < FPKMmax < 1	3.55558	0.473599	0.935443	1.53983	0.0421434	0	0	0.89527	1.32251	0.145509	0	0	0.0470034	0.0498477	0	0.518501	3.55558	0.363634	0.263466	0.184939	3		0	0.473599	0	0	0	0	0	0	0	0	0	0	0	0	0	0	0	0	0
MSTRG.31291	NAT-lncRNA	VI	LOC105056681	not available	0	5.32514	0	0	0	0	0	0	0	0	0	0	0	0	0	0	0	0	0	0	0		0	0	0	0	0	0	0	0	0	0	0	0	0	0	0	0	5.32514	0	1
MSTRG.32111	NAT-lncRNA	VI	LOC105057317	-0.0687706	2.44433	2.56776	0.978194	0	0	0	0	0	0	0	0	0	0	0	0	2.44433	0	0	0	0	1		0.978194	0	0.0826111	2.56776	1.7692	0.049135	0	0.541718	0.0798277	0.492905	0	0.426567	0.560514	0	0	0.0638687	0.0577622	0	2
MSTRG.32229	NAT-lncRNA	VI	LOC105057490	0 < FPKMmax < 1	178.461	0.889142	3.56959	32.0451	98.0696	17.8286	35.2429	178.461	108.228	5.31677	9.16645	1.20163	1.12702	1.27311	1.84673	0	6.92673	15.0125	49.1836	17.9672	17		0	0.467064	0.611613	0.361083	0.29597	0.290502	0.19623	0	0.0393239	0	0	0	0	0	0.889142	0.226542	0	0.0959528	0
MSTRG.32418	NAT-lncRNA	VI	LOC105057693	-0.0311961	1.30224	2.85361	0.0728919	1.06555	0	0.644549	1.04313	0	0.275475	0	0.417187	0.208068	0.331664	0.13564	0	0.622845	0	1.30224	0	0.33603	3		0.0728919	0	0	0	0	0	0	0	0	0	0	0	0.263221	0	0	1.04302	2.85361	0	2
MSTRG.32843	NAT-lncRNA	VI	LOC105057842	-0.167537	25.0193	1.04044	21.1766	13.4949	16.0632	20.9983	22.3391	21.098	25.0193	15.7775	18.1106	13.9438	16.149	10.8695	13.3729	3.64255	8.72616	15.5957	24.2427	11.253	18		0.34584	0	0	0	0	0.482936	0	0	0	0	0	0.130964	1.04044	0	0.702611	0	0	0	1
MSTRG.33179	NAT-lncRNA	VI	LOC105058048	0.709424	1189.23	1182.21	1189.23	4.53756	11.2817	3.33377	6.98456	4.46735	3.76872	4.84332	3.24735	6.81395	2.19382	3.33564	4.47879	0	3.02607	3.08688	2.34481	1.83997	17		1182.21	1087.9	126.409	34.4295	237.878	58.0017	43.4356	159.471	53.999	65.5801	14.6418	16.5937	24.2737	54.2824	9.18479	7.22865	10.8948	2.0358	18
MSTRG.33228	NAT-lncRNA	V	LOC105058065	0.0205792	33.9391	8.5607	0	0	0.0223285	11.3237	7.80884	0.203168	0	0	0	0.0226202	0	0	0	33.9391	0.0447458	0	0	0.048365	3		0	0.265039	0.0910905	0	1.41689	0.21153	0	8.5607	3.41681	2.58235	2.00275	1.55093	4.41674	2.87856	1.63075	0	4.47405	1.02474	11
MSTRG.33984	NAT-lncRNA	VI	LOC105058606	0.315157	596.318	1.19159	76.1374	0	68.2666	356.249	462.928	55.302	38.1363	97.4679	42.5463	62.8515	90.433	84.5227	76.2691	402.641	99.5772	161.504	596.318	48.7488	17		0	0.738151	0	0.207374	0	0.471341	0	0	0.180119	0.149577	0.335086	0.118402	0.255577	0.166985	0.71964	0	1.19159	0.110889	1
MSTRG.34112	NAT-lncRNA	VI	TRNAN-GUU	0 < FPKMmax < 1	1.99658	0.11079	0	0	0	0	0	0	0	0	0	0	0	0	0	1.99658	0	0	0	0	1		0	0.109314	0	0	0.11079	0	0	0	0	0	0	0	0	0	0	0	0	0	0
MSTRG.34288	NAT-lncRNA	VI	LOC105058811	not available	448.513	0	448.513	193.999	283.616	164.216	202.213	305.186	266.71	243.337	213.837	320.458	244.111	267.589	299.236	17.4748	128.699	209.002	186.154	79.4229	18		0	0	0	0	0	0	0	0	0	0	0	0	0	0	0	0	0	0	0
MSTRG.34562	NAT-lncRNA	VI	LOC105059010	0 < FPKMmax < 1	155.313	0.227944	48.3163	155.313	19.0927	32.0391	41.1623	27.15	36.9014	69.3078	76.9516	44.1032	100.921	66.7713	91.5622	0	12.8002	36.4267	25.8587	30.0493	17		0	0	0	0	0	0	0	0	0	0	0	0	0	0	0	0.227944	0	0	0
MSTRG.34710	NAT-lncRNA	VI	LOC105058898	0 < FPKMmax < 1	30.3676	0.496308	21.8933	6.07556	0.331416	14.195	19.9021	3.33417	6.01335	26.7466	23.4344	19.5713	23.3895	14.5092	17.7158	30.3676	13.348	16.4344	15.8979	6.43321	17		0.0252515	0.183527	0	0.47395	0.496308	0	0	0.179687	0.104257	0.0230966	0.0770286	0.027259	0.0474028	0.153991	0.365765	0	0.138948	0.0988339	0
MSTRG.34719	NAT-lncRNA	VI	LOC105058894	0 < FPKMmax < 1	169.87	0.316668	25.4855	18.6569	1.66137	1.46994	0.868398	5.89495	6.45221	39.9961	28.4504	31.1582	22.1719	23.9738	43.2382	0	12.0539	169.87	63.7925	26.2782	16		0	0	0	0	0	0	0.116359	0	0	0	0	0	0	0	0.316668	0	0.144506	0	0
MSTRG.35028	NAT-lncRNA	VI	LOC105059389	not available	0	0	0	0	0	0	0	0	0	0	0	0	0	0	0	0	0	0	0	0	0		0	0	0	0	0	0	0	0	0	0	0	0	0	0	0	0	0	0	0
MSTRG.35307	NAT-lncRNA	VI	LOC105059531	0 < FPKMmax < 1	6.32018	0.479484	0.444289	3.19764	5.07123	4.02688	0	3.88766	0	1.66535	1.64765	1.74896	2.42487	0.146853	6.32018	0	1.86277	0.679946	4.51971	0.652877	11		0	0.243763	0	0.250057	0	0.387086	0	0.38307	0.479484	0	0	0	0.0905381	0	0	0	0	0.416475	0
MSTRG.35835	NAT-lncRNA	VI	LOC105059881	0 < FPKMmax < 1	11.2668	0.621872	1.02384	1.10346	1.12633	2.67474	6.42283	2.59214	0.905819	2.78031	1.80848	4.05641	5.01891	2.84943	3.13142	11.2668	4.01519	1.362	7.25006	0	16		0	0	0	0.25893	0.258124	0.621872	0	0	0	0	0	0	0	0	0.424779	0	0	0	0
MSTRG.37565	NAT-lncRNA	VI	LOC105060994	0.197551	10.5839	17.0246	4.4397	5.43613	0	10.3148	0	3.10126	5.76264	10.5839	0	3.92734	0	0	0	0	2.43519	4.44248	0	0	9		4.4397	3.37409	0	14.5182	17.0246	0	3.22545	0	5.10191	3.42257	0	3.01832	0	0	0	0	3.45503	0	9
MSTRG.38976	NAT-lncRNA	VI	LOC105032085	not available	74.8955	0	2.74929	13.7522	15.986	18.2431	42.0483	74.8955	65.9973	1.16319	1.26508	1.05091	0.0899654	0.0636604	0.414724	0	4.33075	20.0723	33.7063	2.08695	14		0	0	0	0	0	0	0	0	0	0	0	0	0	0	0	0	0	0	0
MSTRG.40308	NAT-lncRNA	VI	LOC105032767	0.281364	1.1204	1.53302	0.135904	0.0410611	0.718701	0.254288	0.458006	0.635432	0.367825	0.122883	1.1204	0	0.0687653	0.802697	0.0949804	0.359846	0	0	0.0471815	0	1		0	0	0	0.536359	0.367443	0	0	1.53302	1.43102	0	0.0750087	0	0.273142	0.0746214	0	0.0268017	0	0.482111	2
MSTRG.40838	NAT-lncRNA	VI	LOC105033035	0 < FPKMmax < 1	0.585156	0.306681	0	0.216999	0.0289229	0.305529	0	0	0	0	0.105287	0.0291535	0.259719	0.241181	0.209373	0.585156	0.291186	0.0492198	0.105628	0.188751	0		0	0.0410692	0.0874782	0	0.148746	0	0	0.275733	0	0.155141	0	0.130758	0.0227442	0.246239	0.306681	0.184717	0.299412	0.0947137	0
MSTRG.41421	NAT-lncRNA	V	LOC105033323	not available	2.07983	0	1.15507	0	0	0	0	1.26899	0	0	0	0	0	0	0	2.07983	0	0	0	0	3		0	0	0	0	0	0	0	0	0	0	0	0	0	0	0	0	0	0	0
MSTRG.41729	NAT-lncRNA	V	LOC105033462	0.205939	22.2615	41.5815	22.2615	2.91422	0	1.3464	0.940388	6.88247	6.50805	0.809873	2.96073	1.62318	1.37415	0.867739	1.2882	13.601	0.36095	3.59079	1.39728	0.780627	12		18.6596	6.84176	41.5815	6.0576	3.87047	2.17577	6.9773	13.9714	4.67837	2.66679	1.65026	4.15052	3.89514	13.601	4.39777	6.04266	7.30376	1.45249	18
MSTRG.41729	NAT-lncRNA	VI	LOC105033463	0.231118	18.6596	41.5815	18.6596	2.41241	0	4.61171	0	0.159552	0	0	1.95665	0.416481	0.74759	1.15008	1.76283	5.0201	1.00185	2.29501	0	0.719794	9		18.6596	6.84176	41.5815	6.0576	3.87047	2.17577	6.9773	13.9714	4.67837	2.66679	1.65026	4.15052	3.89514	13.601	4.39777	6.04266	7.30376	1.45249	18
MSTRG.41771	NAT-lncRNA	VI	LOC105033495	-0.193145	370.374	5.18795	1.91217	2.60206	370.374	0.111332	2.19768	11.4378	12.1227	0.13705	0.0714898	0.395618	0.268102	3.59385	0.162064	0	0.341672	0	1.21244	13.651	9		0	5.03813	0	3.30779	0	5.18795	4.61553	0	0	4.22743	0	3.24575	0	0	3.46367	0	3.18515	0	8
MSTRG.43342	NAT-lncRNA	V	TRNAT-UGU	-0.186488	3.06716	6.12955	0.0794175	0	0	0	0	0	0	0	0	0	0	0	0	3.06716	0	0	0	0	1		0.0794175	3.71728	0	4.9688	0	0	1.74644	6.12955	0	0	3.37793	0	0	0	1.54094	1.74846	1.44297	0.478443	8
MSTRG.43699	NAT-lncRNA	VI	LOC105034341	0 < FPKMmax < 1	28.4719	0.10468	18.8659	10.669	5.86066	4.01035	8.45109	4.68791	9.18597	7.93234	18.5491	11.1211	28.4719	19.9666	16.0433	8.26912	4.8145	3.58422	10.8403	3.82897	18		0	0.032362	0	0	0	0	0	0.0422149	0	0	0	0	0	0	0.0484298	0	0	0.10468	0
MSTRG.44274	NAT-lncRNA	VI	LOC105034540	0.259187	13.4122	1.11709	0	11.3283	3.20215	3.97235	1.98706	7.09184	2.45614	5.84714	4.92313	11.5501	1.45763	3.76254	1.17777	0.717203	13.4122	9.54447	6.59162	3.8695	16		0	1.11709	0	0	0.564198	0	0	0	0	0	0	0	0	0	0	0	0	0	1
MSTRG.46625	NAT-lncRNA	VI	LOC105035322	-0.156504	4.57711	3.60949	0	0.0397077	0	0.0819773	0.0402649	2.76842	4.57711	0.129094	0.0995545	0	0.0332599	0.0705937	0.0854715	0	0	0.100962	0	0	2		0	0	0	1.09068	0	0	0	0	0.426506	0	0	0	0	0	3.60949	0	0	2.56004	3
MSTRG.50266	NAT-lncRNA	VI	LOC105036243	0 < FPKMmax < 1	22.9831	0.757802	0.0839546	0	0	0	0	0	0	1.89488	0	0	0.094089	0	0	22.9831	0	0.196647	0	0	2		0	0.096921	0	0	0	0	0	0	0	0	0	0	0	0	0.757802	0	0	0	0
MSTRG.53636	NAT-lncRNA	VI	LOC105037187	0.390404	7.91905	2.03205	0	0.306577	0.23098	5.58258	3.41283	1.98107	7.91905	0.178464	0.371406	0.617325	0.23963	0.377617	0.31359	0	1.02498	0	0	0	5		0	0.803749	0	1.27713	2.03205	0	0	0	0	0.304544	0	0.657088	0	0	0.401801	0	0	0	2
MSTRG.54180	NAT-lncRNA	V	LOC105037328	-0.299277	50.0647	50.548	14.602	3.11142	17.182	0.638227	6.30616	50.0647	42.0333	11.0194	24.536	6.49477	3.67941	2.70231	4.2478	3.45103	6.53619	5.81881	19.5187	15.7572	17		6.42236	33.4852	5.0269	38.7098	50.548	5.05008	4.93312	15.0121	13.4189	5.93323	11.4488	5.5057	5.26489	3.45103	2.36453	3.85025	6.99066	2.66133	18
MSTRG.100	Intronic-lncRNA		LOC105047461	-0.192988	3.17653	32.3091	0	0.480891	0	0	0	3.17653	0.992084	0	0	0	0	0	0	2.0938	0	0	0	0	2		0	30.8246	0	32.3091	5.89792	0	0	11.5595	2.46071	0.929498	2.20335	2.26807	0.875298	2.0938	11.8818	10.1646	7.74039	5.45921	12
MSTRG.879	lincRNA		LOC105041412	not available	7.73549	0	1.50644	2.26787	4.284	5.01178	3.48484	6.53459	7.73549	6.03986	5.73239	5.92467	5.58152	3.91269	7.11714	0	3.36365	4.90561	4.11164	1.21009	17		0	0	0	0	0	0	0	0	0	0	0	0	0	0	0	0	0	0	0
MSTRG.3376	Intronic-lncRNA		LOC105058435	0 < FPKMmax < 1	4.85842	0.244732	0.738766	0.374758	1.46269	0.402316	0	2.914	4.76098	0.825562	2.00301	0.524455	1.086	0.443455	0	0	1.55763	4.85842	1.90169	4.02867	9		0	0.0628106	0	0.0647227	0.063681	0	0	0	0.0422259	0	0	0	0	0.0521701	0	0.244732	0	0	0
MSTRG.3849	Intronic-lncRNA		LOC105060761	0 < FPKMmax < 1	13.7845	0.815536	13.7845	1.22718	2.30779	0	0	0	0	0.535625	0	1.59475	0.195695	0	0.679822	0	0	0	0.491714	0	4		0	0.0792435	0.178365	0.815536	0.0803317	0	0.635751	0	0	0.0585668	0	0	0	0	0.122418	0	0	0	0
MSTRG.4141	Intronic-lncRNA		LOC105033518	0 < FPKMmax < 1	14.2995	0.207677	14.2995	5.89771	3.53376	5.37302	6.60148	7.23916	8.68724	7.38611	8.0851	6.8815	6.32793	3.90333	6.48945	0.01957	2.64775	9.63777	11.901	8.44634	17		0	0.186156	0	0.120252	0.070797	0.0448272	0.125601	0.0457058	0.0636527	0.017628	0.0587005	0.0207793	0.0904661	0.01957	0.207677	0.0874327	0.183486	0.187131	0
MSTRG.4500	Intronic-lncRNA		LOC105036523	0 < FPKMmax < 1	0.0483983	0.534635	0	0	0.0483983	0	0	0.012416	0	0.0171114	0	0	0	0	0.0101661	0	0	0	0	0	0		0	0	0	0	0	0	0	0	0	0	0.534635	0	0	0.26139	0	0	0	0	0
MSTRG.6830	Intronic-lncRNA		LOC105039313	not available	1.48635	0	0	0	0.525663	1.48635	0	0	0.699427	0.070967	0	0	0	0	0.294919	0.590874	0.384633	0.0682271	0	0	1		0	0	0	0	0	0	0	0	0	0	0	0	0	0	0	0	0	0	0
MSTRG.8840	Intronic-lncRNA		LOC105040771	0 < FPKMmax < 1	0.548216	0.438962	0	0	0	0.548216	0	0	0	0	0	0	0	0	0	0	0	0	0	0	0		0	0.0653668	0	0.269374	0.265085	0	0.147579	0.210256	0.438962	0.19442	0.16327	0.173086	0.149496	0	0	0	0	0	0
MSTRG.13113	Intronic-lncRNA		LOC105043686	-0.407244	1.72857	4.94237	0	0	0.445838	0.623456	0.201781	1.65288	0	0.800793	1.47491	0	0	0	0.935889	1.55314	1.72857	0	0.484978	0	4		0	3.9348	0	0	0	0	0	0	0	2.52162	0.997289	0	0	0	0	0	0	4.94237	3
MSTRG.16331	Intronic-lncRNA		LOC105045810	0 < FPKMmax < 1	12.4414	0.621046	4.76956	8.3506	1.49639	4.01874	3.10701	11.2577	11.4834	9.92527	12.4414	6.50873	4.72772	4.64161	8.05264	1.17328	6.97479	7.03621	9.41833	7.21379	18		0.0310844	0.150382	0	0.116444	0.0762472	0.110079	0.123594	0.318072	0.153303	0	0.0315063	0.0668775	0.145176	0	0.621046	0.0954065	0.0430311	0.182999	0
MSTRG.17550	Intronic-lncRNA		LOC109505990	0 < FPKMmax < 1	0.251761	0.210782	0	0.0406517	0	0.251761	0	0	0.0446911	0	0	0	0	0	0	0	0	0	0	0	0		0	0	0	0.210782	0	0	0	0.11003	0.114674	0	0	0	0.129667	0	0	0	0	0	0
MSTRG.21758	Intronic-lncRNA		LOC105049814	0 < FPKMmax < 1	4.43203	0.762109	4.43203	0.666768	0	0	0	0	0	3.34455	3.20497	0	0	1.06374	1.0714	3.50957	0	0	0	0	6		0	0.256196	0	0	0	0	0	0.762109	0	0	0	0	0	0	0	0	0.357728	0	0
MSTRG.28990	Intronic-lncRNA		LOC105054926	0 < FPKMmax < 1	1.77088	0.497336	0	0	0	0	0	0	0	0	0	0	0	0.303168	0.207065	1.77088	0	0	0	0	1		0	0.497336	0	0.306628	0	0.205963	0.116598	0.315485	0.197504	0	0	0	0.149291	0	0.155809	0.13375	0	0.335482	0
MSTRG.33718	Intronic-lncRNA		LOC105058395	0 < FPKMmax < 1	27.2627	0.832773	0.505999	0.756248	8.38341	10.446	12.4118	24.0881	27.2627	4.6435	12.7216	3.56557	16.343	10.762	13.7251	1.08873	6.44475	8.36197	18.3311	5.9226	16		0	0	0	0.199455	0.456941	0	0	0.167949	0.328875	0.0242854	0.216054	0.430045	0.398724	0.215934	0.0963188	0.243825	0.109848	0.832773	0
MSTRG.33718	Intronic-lncRNA		LOC105058396	0 < FPKMmax < 1	10.6098	0.832773	10.6098	6.15569	2.46847	6.35647	6.02826	6.08499	6.99755	5.7334	5.71429	8.323	7.58024	4.6784	4.4858	2.67894	1.20176	3.29552	2.40912	1.36772	18		0	0	0	0.199455	0.456941	0	0	0.167949	0.328875	0.0242854	0.216054	0.430045	0.398724	0.215934	0.0963188	0.243825	0.109848	0.832773	0
MSTRG.34104	Intronic-lncRNA		LOC105058689	0 < FPKMmax < 1	3.56658	0.346698	0	1.89111	1.32029	0	0	0	1.79313	0	0	0	1.39857	0	0	3.56658	0	3.28155	3.14322	0	7		0	0.156654	0.0145801	0	0	0	0	0.346698	0	0.193164	0.115361	0	0.305048	0.230829	0	0	0	0	0
MSTRG.35374	Intronic-lncRNA		LOC105059555	0 < FPKMmax < 1	7.68157	0.454629	7.68157	3.731	3.10456	4.34988	2.85021	5.4022	6.38059	5.69479	6.75589	4.14642	4.90734	2.75177	6.12406	0.0148177	1.6779	1.76618	2.92394	1.10464	17		0	0.0527612	0	0.454629	0.0713473	0.0505579	0	0.103882	0.168798	0.0133571	0.103659	0.0629194	0	0.0148177	0.338807	0.0438297	0.354375	0.112756	0
MSTRG.35687	Intronic-lncRNA		LOC105059792	0.387851	83.4217	8.64781	31.0984	40.8107	28.0306	83.4217	0	0	0	23.8204	21.6363	20.1112	13.4098	11.7818	22.4978	27.1764	0	8.21219	4.26419	2.19514	14		0	4.57383	0	6.5152	8.64781	0	0	0	0	0	0	0	0	0	0.148421	0.176443	0.153547	0.0541294	3
MSTRG.36438	Intronic-lncRNA		LOC105060269	0 < FPKMmax < 1	6.43338	0.298274	0.252984	1.93633	0.146931	6.43338	4.63733	3.58163	3.83464	3.88367	4.67723	5.35708	3.5235	4.51975	5.64955	4.6812	1.97027	2.4448	5.55874	3.24561	16		0	0.0492665	0	0.0508187	0	0	0	0	0.0333139	0	0.0823477	0.131034	0.075682	0	0.298274	0.063186	0.0571385	0	0
MSTRG.36684	Intronic-lncRNA		LOC105060444	-0.0274395	4.18446	1.14348	0.230191	0	0	0	0	0	0	4.18446	0	1.75152	0	1.08398	0	1.76948	1.70908	0.904444	0	0.765095	5		0	0.222762	0	1.14348	1.12883	0	0	0.421874	0.220054	0.243544	0	0	0.166267	0	0	0.302836	0	0	2
MSTRG.36890	Intronic-lncRNA		LOC105060570	0.324186	7.71357	1.4886	5.06404	3.20621	1.13457	4.70851	1.90796	0	7.71357	3.94461	6.46989	4.05276	1.87906	4.47014	4.53007	0.803112	3.95371	1.66949	7.36402	3.57938	16		0	0	0	1.22041	0	0	0	0	0	0	0.674964	0	0	0	0	0	1.4886	0	2
MSTRG.38069	Intronic-lncRNA		LOC105061299	0 < FPKMmax < 1	7.49536	0.655211	2.33652	2.21414	0.325007	7.49536	4.84773	0.891608	1.95804	1.40289	1.21846	1.59468	0.786445	1.14719	1.72655	0.728732	0.88343	2.3302	0	1.13364	12		0	0	0	0.26137	0	0	0	0	0.166741	0.184512	0	0.110601	0.0944358	0	0	0.175699	0	0.655211	0
MSTRG.38824	Intronic-lncRNA		LOC105032008	0 < FPKMmax < 1	3.23866	0.259873	0	0.395125	0	0	0	0	1.2436	1.18893	2.27864	0	0.421618	0.225051	0.442289	3.23866	0	0	0.194477	0	4		0	0.0218589	0	0	0.0221686	0	0.023563	0.0572808	0	0	0.0551604	0	0	0	0.259873	0.0546854	0.0737547	0.140509	0
MSTRG.39285	Intronic-lncRNA		LOC105032287	0 < FPKMmax < 1	7.71823	0.158623	0.219897	7.71823	0	0	0.0596663	1.58367	0.196384	0	0	0	0	0	0	0	0	0	0	0	2		0	0	0	0.158623	0	0	0	0	0	0	0	0.0273686	0	0	0	0	0	0	0
MSTRG.39395	Intronic-lncRNA		LOC105032328	-0.182635	3.03328	13.4437	0	0	3.03328	1.75632	1.6541	0	0	1.01054	0.595215	1.52484	0.540142	0.853166	1.35001	2.34428	0.393129	0	1.0746	0	8		0	13.4437	1.28225	0	0	0	0	0	0	1.89175	2.24171	0	0	0	0	0	0	0	4
MSTRG.41087	Intronic-lncRNA		LOC105033147	0 < FPKMmax < 1	4.59144	0.281132	0.435315	1.28581	0.401326	4.16086	1.64015	0.440714	0	1.4172	4.59144	1.45005	0.981186	3.08645	1.45998	1.70289	0	1.08997	0	0	10		0	0.0290299	0	0	0	0	0	0	0	0	0	0.0517635	0.0225107	0	0.260081	0	0.0658212	0.281132	0
MSTRG.41099	Intronic-lncRNA		LOC105033152	-0.0261345	1.12641	6.59146	0	0	0.0392283	0.0271968	0.106768	0	0.0285035	0.101615	0.305581	0	0.132695	0.07045	0.143049	1.12641	0.235378	0.165278	0.356984	0	1		0.447497	4.74056	0.132987	5.38135	1.06715	0.785707	0.675273	5.39992	4.6151	0.747188	1.70934	3.60831	1.01836	1.12641	6.59146	4.76255	4.66137	5.83832	13
MSTRG.41141	Intronic-lncRNA		LOC105033170	0 < FPKMmax < 1	0.172713	1.73738	0	0	0.0215582	0	0	0	0.157016	0	0	0	0	0.128919	0.022426	0	0.172713	0	0.131123	0	0		1.34529	0	0.574252	0	0	0	0	1.02087	0.498234	1.0296	0.508157	0.356722	0.300314	0.667379	1.73738	0.30608	0	0	4
MSTRG.42134	Intronic-lncRNA		LOC105033705	0 < FPKMmax < 1	12.4091	0.250949	1.95595	2.94809	0	0	0	4.98978	0	9.61938	12.4091	10.5482	8.99756	6.84655	8.4931	3.25415	0	10.8311	0	0	11		0	0.0211186	0	0	0	0	0	0.0691978	0.0578233	0.0800699	0.0533017	0.0943496	0.0164375	0.0177732	0.250949	0.131996	0.0237329	0.237456	0
MSTRG.42406	Intronic-lncRNA		LOC105033845	0 < FPKMmax < 1	51.8713	0.130912	8.13375	2.09387	1.17179	1.06294	0.69904	0.557462	1.66859	37.0796	51.8713	9.71025	16.3176	1.72269	7.14333	0	0	0	4.98881	13.4311	13		0	0.130912	0	0	0	0	0	0	0	0	0	0	0	0	0	0	0	0	0
MSTRG.43587	Intronic-lncRNA		LOC105034310	0 < FPKMmax < 1	41.7855	0.394925	0	13.6051	4.27896	19.6059	41.7855	9.26167	19.8358	6.04335	6.86515	10.6564	7.46205	7.0509	5.28895	0	3.59603	7.76636	6.61599	3.16756	16		0	0.0925479	0	0.394925	0.0703998	0	0.0246775	0.00761179	0	0	0.00975467	0.0310927	0.0180904	0	0.29028	0.0573512	0.0514603	0.110849	0
MSTRG.44443	Intronic-lncRNA		LOC105034623	0 < FPKMmax < 1	1.73237	0.305502	0	0	0	0	1.73237	0	0.688921	0	0	0	0	0	0.97844	0	0	0	0	1.41862	2		0	0	0	0	0	0	0	0.123962	0	0.143171	0	0.0854185	0.146664	0	0.305502	0	0	0	0
MSTRG.44444	Intronic-lncRNA		LOC105034623	0 < FPKMmax < 1	1.73237	0.3499	0	0	0	0	1.73237	0	0.688921	0	0	0	0	0	0.97844	0	0	0	0	1.41862	2		0	0	0	0.272299	0.0890996	0	0.0318145	0.0382525	0.0199756	0	0	0.0783261	0.045414	0	0.3499	0.0368805	0	0	0
MSTRG.47291	Intronic-lncRNA		LOC105035510	0 < FPKMmax < 1	3.06906	0.423707	0	0	0	1.98802	2.1886	0	1.59157	0	0	1.59924	0	0	1.63174	0.533383	1.5168	0	3.06906	0	7		0	0	0	0.172412	0	0	0	0.0360036	0.0375883	0	0.0930311	0.0493316	0	0	0.423707	0	0.260518	0	0
MSTRG.1749	lincRNA		LOC105047386	0.539587	177.576	150.943	177.576	13.2552	7.21348	32.2886	36.2917	17.6667	17.8301	21.0721	21.3016	17.6729	17.7708	13.4254	18.3107	1.03952	10.8095	18.864	13.5808	4.89001	18		150.943	24.5634	96.0233	20.0962	46.1501	30.8372	34.1408	47.8578	42.6129	68.0466	101.841	78.1986	61.4256	62.6566	49.6777	136.387	68.1293	28.7601	18
MSTRG.2423	lincRNA		LOC105052619	-0.140325	29.6514	1.18704	0.875192	0	0	0	0	0	0	0	0	0	0	0	0	29.6514	0	0	0	0	1		0.875192	0.19002	0	0	0	0.195876	0.221633	0	0	0	0.0785586	0.200665	0	0	1.18704	0.254444	1.16233	0	2
MSTRG.4268	lincRNA		LOC105034302	not available	0	0.262924	0	0	0	0	0	0	0	0	0	0	0	0	0	0	0	0	0	0	0		0	0	0	0	0	0	0	0	0	0	0.0364817	0.0387097	0	0	0.262924	0	0.0502352	0.141988	0
MSTRG.4377	lincRNA		LOC105035093	-0.40122	7.2115	2.16603	4.02873	0	1.49323	5.63266	2.59098	0	3.84806	2.55843	3.41075	1.24278	3.57259	2.35899	2.67216	2.70437	2.16956	7.2115	1.56587	1.28582	16		0	2.16603	0.0615633	0	0	0	0	0	0	0	0	0	0	0	0	0	0	0.268201	1
MSTRG.6629	lincRNA		LOC105039207	-0.158292	31.9214	1.3102	1.74694	1.99965	0.56315	0	0	3.57234	3.18399	2.42768	4.12206	0.511175	3.51713	1.07381	3.22442	31.9214	0.169994	1.00546	1.33891	0.257445	12		1.3102	0.834566	0.401279	0.58416	0.409528	0.208145	0.204213	0.193591	0.183813	0.366504	0.180945	0.144096	0.0626899	0.248767	0.321138	0.236807	0.395836	0.433964	1
MSTRG.7108	lincRNA		LOC105039424	0 < FPKMmax < 1	0.686712	5.20747	0.0234277	0	0.0423283	0.0293337	0.0287932	0	0	0.333887	0.619943	0.686712	0.59614	0.430403	0.594621	0	0.211885	0.0357255	0.418145	0.137425	0		0	0	0	0	0	0	5.20747	0	0	0	0	0	0	0	0	0	0	0	1
MSTRG.8225	lincRNA		LOC105040362	0 < FPKMmax < 1	21.3156	0.640568	13.1961	12.9771	8.73376	20.5672	21.3156	13.8692	15.0762	9.90341	6.39269	9.97249	4.35296	11.6131	11.7335	13.4179	7.49327	5.67051	9.56195	6.82312	18		0	0.230381	0	0	0	0	0	0	0	0	0	0	0	0	0.640568	0	0	0.344995	0
MSTRG.9189	lincRNA		LOC105041014	0 < FPKMmax < 1	0.215671	0.343963	0	0	0	0	0	0	0.215671	0	0	0	0	0	0	0	0	0	0	0	0		0	0	0	0	0.144517	0	0	0	0.0296942	0.343963	0	0	0	0	0	0	0	0	0
MSTRG.9372	lincRNA		LOC105041142	0 < FPKMmax < 1	7.98346	0.412031	0	0	0.0237473	0	0.0951306	0	0	0.0590288	1.21792	0	0	0.0141789	0	0	0.37893	0.2531	0	7.98346	2		0	0	0	0	0.304977	0.387163	0	0.175824	0	0	0	0	0.412031	0	0	0	0	0	0
MSTRG.9931	lincRNA		LOC105041652	not available	13.2791	0	0	0	0	0	0	0	0	0	0	0	0	0	0	13.2791	0	0	0	0	1		0	0	0	0	0	0	0	0	0	0	0	0	0	0	0	0	0	0	0
MSTRG.12405	lincRNA		LOC105043190	0 < FPKMmax < 1	7.36204	0.873076	0.209573	0	0	0	0	0.819045	1.77742	0.230826	0.182361	0	0	0	0.362251	0.0766594	0	7.36204	0	0.112371	2		0.209573	0	0	0	0	0	0	0.440187	0.458337	0	0	0	0.344735	0	0	0.362046	0	0.873076	0
MSTRG.13318	lincRNA		LOC105043830	-0.0498072	64.6994	3.47703	0	0	0.987027	0	0	0	0	0	0	0	0	0	0	64.6994	0	0	0	0	1		0	0.363139	0	3.47703	2.33073	0	0.14543	0	0.238183	0	0	0	0.0899518	0.197476	0	0	0	0	2
MSTRG.13346	lincRNA		LOC109505756	0 < FPKMmax < 1	3.18887	0.630335	0.883384	0.620797	1.35976	0.56291	1.64378	0	0.791078	0	0	0.181978	0.14462	0.184212	0.373449	3.18887	0.258429	0.130912	0.59007	0.335114	3		0	0	0	0	0	0	0.551262	0	0	0	0	0	0	0	0.220316	0.630335	0.356773	0	0
MSTRG.13556	lincRNA		LOC105044029	0 < FPKMmax < 1	2.55274	0.108667	0	2.55274	0	0	0.342837	0	0	0	0	1.72431	0	0	0	0	0	0	0	0.709308	2		0	0	0	0	0	0	0	0.108667	0	0	0	0	0	0	0	0	0	0	0
MSTRG.13658	lincRNA		LOC105044238	0 < FPKMmax < 1	0.35138	0.0693229	0	0.35138	0	0.0518744	0.0509072	0	0	0.147781	0.343006	0	0.0632871	0	0	0.0693229	0	0	0	0	0		0	0	0	0	0	0	0	0	0	0	0	0	0.0634992	0.0693229	0	0	0	0	0
MSTRG.14885	lincRNA		LOC105045122	-0.203802	42.2893	1.03768	29.8003	22.7915	21.3236	31.7772	38.628	20.9273	26.1064	33.7496	42.2893	17.7294	20.3461	16.1612	14.531	0	10.3113	14.8862	14.0641	11.0795	17		0	0	0.0584834	0	0	0.395228	0.178452	0.299359	0.104146	0	0.0647187	0.137149	0.0590876	0	0	0	0.654293	1.03768	1
MSTRG.15267	lincRNA		LOC105045313	0.432075	35.0334	1.21521	31.2662	27.0753	20.2672	17.0043	13.5342	10.1534	17.8844	19.949	14.4649	18.3691	10.0875	8.04741	10.4432	0	30.5911	35.0334	24.3561	16.8743	17		0.76215	0.273274	0.479137	0.0936622	0	0.18708	0.211563	0.405876	0	1.00466	0	0.319344	0.973907	0.288348	0.425635	1.21521	0.221849	0.305636	2
MSTRG.15330	lincRNA		LOC105045353	0 < FPKMmax < 1	5.87058	0.141585	2.40414	1.04435	5.87058	0	0	0.921548	2.06783	3.24164	0	0	0.929554	0.479309	1.29902	0	1.04142	1.6857	1.4393	2.52492	10		0	0	0	0	0	0.109047	0	0	0	0	0	0	0	0	0	0.141585	0	0	0
MSTRG.15597	lincRNA		LOC105045486	not available	7.08283	0	1.15898	4.50884	0.0314517	1.04927	1.32903	3.63391	2.3957	0.740886	0.841676	0.996778	0.201855	0.25229	0.253083	0	7.08283	2.20531	4.19526	0.698625	9		0	0	0	0	0	0	0	0	0	0	0	0	0	0	0	0	0	0	0
MSTRG.15774	lincRNA		LOC105045606	0 < FPKMmax < 1	4.26488	0.270986	0.296159	0.317424	1.77715	2.91248	4.26488	0.271603	0.30503	0.144388	0.615614	0.626631	0.897353	0	0.551044	0	0.238678	0.453975	0.955945	0.773532	3		0	0	0	0	0	0	0	0.14923	0	0	0.147245	0.203836	0.270986	0	0.0663488	0.0561476	0.202867	0	0
MSTRG.15884	lincRNA		LOC105046090	-0.314421	79.6861	2.40979	36.2334	11.4072	6.5293	11.5568	9.01553	17.8361	22.8995	41.3561	44.5503	25.3953	45.5024	38.8587	42.1817	0	14.3383	79.6861	19.1501	18.9674	17		0	0.982594	0	0	0	0.652994	1.07044	0	0	0	0	0	0	0	2.40979	0	2.36697	1.91524	4
MSTRG.15884	lincRNA		LOC105046088	-0.285864	172.722	2.40979	9.04428	3.43083	40.4089	8.58984	8.55636	24.0581	24.1256	98.8356	77.2876	11.5988	11.3251	9.98515	17.0683	1.29895	4.71954	172.722	2.76578	18.7407	18		0	0.982594	0	0	0	0.652994	1.07044	0	0	0	0	0	0	0	2.40979	0	2.36697	1.91524	4
MSTRG.16563	lincRNA		LOC105045631	0.265927	6.82149	1.42244	2.54434	2.24195	3.5951	0	4.13424	6.82149	2.92148	0.852245	1.1793	0	1.87469	1.0509	0.617814	5.43107	2.30892	5.19842	3.15142	1.56291	14		0.129272	0.273453	0.256498	0	0	0.285154	0.451241	0	0	0	0.194596	0	0	0	1.42244	1.35153	1.13659	1.09454	4
MSTRG.17816	lincRNA		LOC105047007	not available	8.63076	0	0	0	0	0	0	0	0	0	0	0	0	0	8.63076	4.70773	0	0	0	0	2		0	0	0	0	0	0	0	0	0	0	0	0	0	0	0	0	0	0	0
MSTRG.17928	lincRNA		LOC109504780	0 < FPKMmax < 1	23.5551	0.47625	0	0.109148	0	0	0.442729	0	0.238909	0	0.222653	0.137007	0.091496	0.0647418	0	23.5551	0	0	0.124759	0	1		0	0	0	0	0	0	0	0	0.0764125	0	0	0	0	0	0	0.47625	0	0	0
MSTRG.18243	lincRNA		LOC105047303	0 < FPKMmax < 1	103.601	0.187969	0.231568	103.601	0.616243	0.053131	0.0522353	2.64874	4.70443	0	0	0	0	0	0	0	0	0	0	0	3		0.0179373	0.172191	0	0	0	0.187969	0	0	0.150092	0.101241	0	0.0695654	0.0520065	0.0869779	0.0767031	0	0	0	0
MSTRG.18914	lincRNA		LOC105047836	0 < FPKMmax < 1	79.7329	0.0700064	5.19766	5.19705	4.09941	27.9921	29.7825	6.02278	7.76006	79.7329	52.9183	30.496	43.6392	22.9835	49.2996	2.95024	16.6282	13.186	47.6945	11.3791	18		0	0	0	0.0700064	0.0689041	0	0	0	0	0	0	0	0	0	0	0	0	0	0
MSTRG.19344	lincRNA		LOC105048137	-0.204899	41.5165	8.96405	41.5165	25.7472	14.7707	5.1494	1.79187	13.5053	17.1102	25.2054	13.1899	15.2587	13.8756	15.1802	9.68731	4.6282	2.3237	8.66286	4.05348	3.6578	18		0	0	0	0	7.33617	0	8.96405	0	0	0	1.60206	0	0	0	0	0	0	5.87613	4
MSTRG.19779	lincRNA		LOC105048489	-0.0903476	14.5055	1.6095	0	0	0	14.5055	0	0	2.98081	0	2.4028	0	1.28147	0	1.29176	2.0333	1.80914	0.492447	0	0.772372	7		0	0	0	0	0	0	0	1.6095	0.558273	0	0	0	0.311871	0	0	0	0	0	1
MSTRG.20304	lincRNA		LOC105048842	-0.160229	132.834	23.9941	81.0194	132.834	90.6481	38.848	46.5571	90.9527	81.065	129.207	132.487	129.622	90.0574	76.8634	76.212	1.23251	50.11	111.69	110.365	42.3201	18		11.5574	10.7926	0	0	23.9941	0	0	0	0	0	0	0	0	0	0	0	0	6.04407	4
MSTRG.20304	lincRNA		LOC105048843	-0.0994944	99.7941	23.9941	11.5574	0.467924	2.5948	6.24775	2.50814	1.10484	1.78682	4.11828	3.68956	5.06633	4.03739	0	2.92982	99.7941	0	7.09769	3.19848	1.79657	15		11.5574	10.7926	0	0	23.9941	0	0	0	0	0	0	0	0	0	0	0	0	6.04407	4
MSTRG.20757	lincRNA		LOC105049092	0 < FPKMmax < 1	6.46909	0.512449	4.99978	4.84164	0.386904	3.60162	3.859	1.55079	3.08415	6.46909	5.98007	3.1465	4.38947	3.35802	2.85889	3.30585	2.44711	3.22217	3.17107	1.10118	17		0.0202702	0.0245863	0	0.105854	0.0748026	0	0	0.273554	0	0	0	0.0438943	0.191052	0	0.512449	0.290234	0.222499	0.197879	0
MSTRG.21649	lincRNA		LOC109506144	0 < FPKMmax < 1	0.224342	0.217062	0.206421	0.0126569	0	0	0	0.0603708	0.0405441	0.116537	0.0260874	0.125242	0.0213393	0.0566793	0.0296732	0	0.224342	0.0157019	0.0563687	0	0		0.185606	0	0	0	0	0	0	0	0.217062	0	0	0	0	0	0	0	0	0	0
MSTRG.22099	lincRNA		LOC105050008	not available	66.6968	0	0.690004	0.783485	0.562114	66.6968	16.5737	2.85863	1.67096	31.1364	11.9776	16.6752	8.12969	5.76734	11.8591	0	7.67599	3.42249	18.1749	1.58043	14		0	0	0	0	0	0	0	0	0	0	0	0	0	0	0	0	0	0	0
MSTRG.22839	lincRNA		LOC105050613	0 < FPKMmax < 1	5.06917	0.408135	5.06917	0	0.915753	0.346147	0	0.926567	1.98955	2.59342	2.55636	0	2.03181	1.95838	1.48082	0.613385	2.08329	2.93549	1.63709	1.41091	11		0	0	0	0.18736	0	0.408135	0	0.205421	0	0	0.266574	0.070607	0.060812	0.0663526	0	0	0	0	0
MSTRG.22839	lincRNA		LOC105050615	0 < FPKMmax < 1	8.96521	0.408135	6.77551	1.1474	0.896398	0	0	2.30329	2.28266	6.06934	0	1.06175	3.58491	0	0.427028	0	0	8.96521	2.18613	2.84202	10		0	0	0	0.18736	0	0.408135	0	0.205421	0	0	0.266574	0.070607	0.060812	0.0663526	0	0	0	0	0
MSTRG.24938	lincRNA		LOC105052088	-0.126013	55.6194	12.7008	5.5687	6.86333	0	4.61539	4.26459	1.6952	1.71447	4.1981	3.26153	3.87442	2.95329	2.11856	3.11813	55.6194	1.0678	3.54434	2.10878	2.13405	17		0	12.7008	0	12.0325	3.77849	1.04095	4.96525	3.5869	1.97532	0.974327	2.56756	1.79471	2.95757	1.11431	10.5726	1.68226	2.15254	4.62954	15
MSTRG.24938	lincRNA		LOC105052087	0.307218	4.22644	12.7008	2.12244	4.22644	0.369451	1.62379	1.91483	3.04872	3.7242	1.40022	1.43161	0.775892	1.84311	1.39683	2.11088	0.320839	0.271426	0.229748	0.415137	0.0732837	11		0	12.7008	0	12.0325	3.77849	1.04095	4.96525	3.5869	1.97532	0.974327	2.56756	1.79471	2.95757	1.11431	10.5726	1.68226	2.15254	4.62954	15
MSTRG.25525	lincRNA		LOC105052741	0.272502	540.956	1.69524	174.637	61.8895	338.858	354.674	540.956	100.32	99.4816	345.749	237.219	247.763	199.51	409.523	180.813	125.31	205.533	263.812	237.65	98.0394	18		0	0	0	1.14385	0	0	0	1.18343	0.616068	0	0	1.69524	0.686505	0.786747	0	1.68026	0	0.969403	4
MSTRG.26385	lincRNA		LOC109506347	0.734836	655.514	3.63896	0.421769	5.96509	33.3664	4.74352	5.0359	655.514	566.805	0	0	0.590068	0	0	0.241343	0	0	0.235071	0	0	6		0	0	0.390745	0	0	3.63896	0	0	0	0	0	0	0	0	0	0	0	0	1
MSTRG.26849	lincRNA		LOC105053412	0 < FPKMmax < 1	112.192	0.164328	25.331	12.8871	27.2955	32.6431	38.6658	112.192	109.495	22.0211	12.4636	6.14118	1.47526	2.88692	3.58544	0	9.97564	18.9396	4.4511	3.95009	17		0.133268	0	0	0.164328	0.161873	0	0	0	0	0	0	0	0	0	0	0	0	0	0
MSTRG.26930	lincRNA		LOC105053533	0 < FPKMmax < 1	1.53039	0.817281	1.16298	1.3929	0.0288082	0.85573	1.53039	1.41114	0.769594	0.875423	0.742145	0.983649	0.618738	0.536127	0.678166	0	0.717543	0.579468	1.38869	0.651866	5		0	0	0	0	0	0	0	0	0	0	0	0	0	0.817281	0	0	0	0	0
MSTRG.27710	lincRNA		LOC105054032	not available	12.6526	0	0	0	0	0	0	0	0	0	0	1.64952	0	0	0	12.6526	0	2.56551	0	0	3		0	0	0	0	0	0	0	0	0	0	0	0	0	0	0	0	0	0	0
MSTRG.27918	lincRNA		LOC105053901	0.237581	18.1841	1.03368	0.241039	0	0	0	0	1.1822	0	0	0	0	0	0	0	18.1841	0	0	11.4405	0.785502	3		0.241039	0.216971	0.0542149	0	0	0.145868	0.0822635	0	0	0.268071	0.429412	0.191142	0.989239	0.119786	0.311856	0.473879	1.03368	0	1
MSTRG.28205	lincRNA		LOC105054450	-0.0669239	19.0964	2.52464	0.131099	0.113673	0.0282789	14.161	19.0964	0.406909	0.539954	0	0.0514963	0	0	0	0.0292594	0	0	0.0480913	0.130152	0	2		0.131099	0.35477	2.52464	0.432012	0	0	0.482812	0	0.189961	0.0975477	0	0	0.131184	0	0.132878	0.279081	0.390637	0.118197	1
MSTRG.28431	lincRNA		LOC105054609	0 < FPKMmax < 1	30.7206	0.280377	6.53182	5.23554	6.34515	2.82863	3.19367	26.0479	30.7206	1.78921	1.75807	2.39803	1.54131	2.00146	2.61785	0	1.72373	0.832912	1.87964	0.0665008	15		0	0	0	0.106741	0	0	0	0.045173	0	0	0.0434632	0.0615577	0	0	0.280377	0.0642927	0.0962564	0.165418	0
MSTRG.28929	lincRNA		LOC105054959	0.883088	38.7105	5.73618	13.663	4.02153	6.34428	17.0682	38.7105	0.46507	0.813798	1.554	2.01046	2.58719	0.697892	0.693983	1.0015	6.43964	0.0792089	0.201502	0.121555	0.342037	10		2.57252	0.326446	1.00007	0	5.73618	0.0901726	0.119843	0.536261	0.781816	0.353189	0.267124	0.296424	0.4828	0.354018	0.132096	0.097718	0.417668	0.159826	3
MSTRG.30654	lincRNA		LOC105056259	-0.142474	21.5212	1.48794	11.9916	21.5212	0.109427	0.0569915	0.0186343	0.942	0.947259	0.433964	0.642183	1.50655	0.89713	0.706474	0.443905	0.429976	0	0.756061	1.02928	0.412491	4		0.341858	0	0	1.0409	1.48794	0	0.70969	0.222657	0	0.502833	0	0.332246	0	0	0	0	0.428764	0	2
MSTRG.31597	lincRNA		LOC105056982	0.285618	69.5427	79.7324	8.30719	9.2094	32.7728	69.5427	54.5653	47.8094	58.2441	9.62143	14.5047	7.42968	8.73728	5.09131	11.4062	0	6.487	29.8307	17.4083	4.28377	17		5.39133	10.8496	45.1935	0	79.7324	0	0	0	16.5806	9.5618	0	2.66328	16.0654	8.47113	0	6.02718	14.057	5.82713	12
MSTRG.31864	lincRNA		LOC105057145	0 < FPKMmax < 1	33.2933	0.0884731	0	0	0	0	0	0.684605	0	0	0	0	0	0	0	33.2933	0	0	0	0	1		0	0	0	0	0	0.0230971	0.0258885	0	0	0	0	0.0884731	0	0	0.048551	0.0402485	0	0	0
MSTRG.31920	lincRNA		LOC105057180	0 < FPKMmax < 1	0.858037	1.03287	0	0.30298	0	0.775264	0.306974	0	0.188632	0	0	0	0.12362	0.1306	0.444143	0.858037	0.244646	0	0	0.262635	0		0	0.16162	0	0	0.373045	0	0	0	0	1.03287	0.241562	0.410079	0	0	0.490773	0	0	0.26488	1
MSTRG.32195	lincRNA		LOC105057509	0.136948	11.7476	11.7565	9.00359	0.337423	2.59243	0.139387	0.171087	10.0415	11.7476	0.615859	0.735047	0.941379	0.198121	0.360525	0.469921	3.59532	1.06138	0.127992	0.34609	0.327711	6		0	11.7565	4.18398	0	0	6.05261	0	0	0	0	0	0	0	3.59532	0	0	0	0	4
MSTRG.32227	lincRNA		LOC105057490	0.0738389	178.461	1.74415	3.56959	32.0451	98.0696	17.8286	35.2429	178.461	108.228	5.31677	9.16645	1.20163	1.12702	1.27311	1.84673	0	6.92673	15.0125	49.1836	17.9672	17		0	0	0	0	0	0	0	0	0.185703	0	0	0	0	0	0	0	1.74415	0	1
MSTRG.32602	lincRNA		LOC105057727	-0.230262	13.5002	2.63909	10.4308	3.53063	2.1816	4.32346	5.24069	2.21529	3.2823	1.7541	4.68068	13.5002	6.16275	5.76461	13.2106	4.0307	3.34879	4.37999	5.71684	1.18665	18		0	2.16755	0	0	0	0	0	2.63909	0	0.517104	0	0	0	0	1.43339	0	0	0	3
MSTRG.34658	lincRNA		LOC105058932	0 < FPKMmax < 1	19.0025	0.677754	7.61545	6.77463	7.02786	9.32146	10.4389	13.5516	13.9624	16.6887	16.7074	19.0025	11.4199	9.99894	12.1492	0	7.358	15.5034	13.8884	4.46212	17		0.471793	0	0	0.590321	0.677754	0	0.203426	0	0	0	0	0	0	0	0.332916	0	0.227923	0	0
MSTRG.35465	lincRNA		LOC105059615	0 < FPKMmax < 1	136.294	0.526254	7.58068	9.41968	4.36444	10.1165	9.95345	9.81678	11.1144	14.1116	18.1242	12.8764	13.7033	12.3314	9.0859	136.294	5.99109	15.2563	10.6447	6.25674	18		0	0.0576213	0	0	0	0	0	0	0	0	0	0	0	0	0.526254	0.148952	0	0.0946563	0
MSTRG.35502	lincRNA		LOC105059644	0.0689199	44.7655	12.6838	12.2429	0	0	0	0	44.7655	13.1903	0	0	0	0	0	0	1.70914	0	0	0	0	4		12.2429	12.6838	0.0863248	0	0	0	0.422894	0.0250798	0	0.49313	0	0	0	0	0	0	0	0.0625892	2
MSTRG.35597	lincRNA		LOC105059740	not available	4.66906	0	2.67482	2.37579	1.08625	0.621445	1.95696	1.38689	0.986667	4.66906	1.57506	1.26369	1.06298	0.818128	0.301582	0	0.710493	1.39871	0.936121	1.63816	11		0	0	0	0	0	0	0	0	0	0	0	0	0	0	0	0	0	0	0
MSTRG.36456	lincRNA		LOC105060282	not available	59.7777	0	1.46514	1.34984	1.117	59.7777	26.0538	1.64949	2.93191	0.589644	0.251859	1.26709	0.342465	0.350936	0.366948	4.29129	0.614733	0	0.867112	0.0688447	9		0	0	0	0	0	0	0	0	0	0	0	0	0	0	0	0	0	0	0
MSTRG.37370	lincRNA		LOC105060866	-0.132866	17.163	3.34115	9.29916	12.3104	9.62573	4.13107	5.48648	3.89464	17.163	2.74728	3.2807	2.23272	2.30903	3.3087	2.94428	4.30429	0	0	0	0	14		0	0.460951	0.427702	0	2.32457	0.432024	0	0	0	0	0	0	1.08936	0	0	0	0	3.34115	3
MSTRG.37393	lincRNA		LOC105060878	not available	108.933	0	54.2698	38.1536	47.6576	0.889381	3.13835	108.933	99.8927	2.80096	1.62307	3.23301	0.101742	1.93688	2.11453	0	6.50339	15.4934	6.10644	12.7124	15		0	0	0	0	0	0	0	0	0	0	0	0	0	0	0	0	0	0	0
MSTRG.37682	lincRNA		LOC105061072	0 < FPKMmax < 1	0.997289	26.4624	0	0	0	0	0	0	0	0	0	0	0	0	0	0.997289	0	0	0	0	0		0	4.61726	0	10.1682	20.7057	0	0	0	0	0	0.856564	0.884782	0	0	26.4624	1.93336	2.9274	4.23813	7
MSTRG.37946	lincRNA		LOC105061219	0 < FPKMmax < 1	19.2726	0.34969	7.63997	17.2168	3.32585	6.2062	4.61623	4.85492	6.6152	5.88952	7.2799	5.67464	4.27769	6.16529	9.75331	19.2726	2.41785	4.77876	10.7801	3.85576	18		0	0.34969	0	0.160985	0.1389	0	0	0	0.164456	0	0	0	0	0	0.27338	0.0932368	0	0.125468	0
MSTRG.38361	lincRNA		LOC105061412	not available	4.49522	0	0	0	0	0	0	0.0965618	0	0	0	0.0733207	0	0	0	0.0368164	0	0	4.49522	1.23534	2		0	0	0	0	0	0	0	0	0	0	0	0	0	0	0	0	0	0	0
MSTRG.40767	lincRNA		LOC105032991	0 < FPKMmax < 1	1.2642	0.184591	1.2642	0	0	0.0945722	0.154739	0	0	0	0	0.553972	0	0	0	0	0	0	0	0	1		0	0	0.0158863	0	0	0.184591	0.0229815	0.0209999	0	0	0.0629096	0.0381788	0.0415692	0	0	0	0	0	0
MSTRG.40925	lincRNA		LOC105033072	0 < FPKMmax < 1	15.2341	0.067878	7.32506	10.4105	3.12648	15.2341	14.0754	11.5477	14.6342	2.85268	2.16648	7.22855	2.27179	3.33272	2.76946	0	1.25983	1.72438	0.503489	1.36099	16		0	0.067878	0	0	0	0	0	0	0	0	0	0	0	0.0562896	0	0	0	0	0
MSTRG.41420	lincRNA		LOC105033323	-0.166289	2.07983	4.57209	1.15507	0	0	0	0	1.26899	0	0	0	0	0	0	0	2.07983	0	0	0	0	3		1.15507	1.92977	0.17789	0	0	0.568645	0.629091	0	0	0	0	0	0	0	3.95332	4.57209	3.37766	2.19697	6
MSTRG.43275	lincRNA		LOC105034182	0 < FPKMmax < 1	16.3879	0.681213	6.10566	3.43337	5.53994	9.76522	4.60903	5.96857	5.20618	16.3879	5.61911	15.9732	7.54473	4.78977	7.50294	2.78349	10.4557	12.6735	14.8354	3.45625	18		0	0	0	0	0	0	0	0	0	0	0	0	0	0	0.317947	0	0.26048	0.681213	0
MSTRG.47299	lincRNA		LOC109505147	-0.0950538	1.46336	9.67875	1.46336	0.22657	0	0.116286	0	0	0	0	0	0	0	0	0	0.0386414	0	0	0	0	1		1.17764	2.09506	1.41214	1.22439	0	0.0830284	6.60641	0.235585	0.598269	3.09308	0.483678	1.1071	1.00241	1.13903	9.67875	3.67543	3.27835	0.104034	12
MSTRG.48025	lincRNA		LOC105035704	0 < FPKMmax < 1	16.7784	0.17947	0	0	2.74771	3.43307	2.72025	12.0016	5.10494	6.11796	8.30907	16.7784	6.67686	12.8569	4.09498	15.5262	0	6.67846	10.0052	3.15046	15		0	0	0	0	0	0.119186	0	0	0	0	0	0	0	0	0.17947	0	0	0	0
MSTRG.48295	lincRNA		LOC105035759	0 < FPKMmax < 1	17.898	0.49079	2.1708	17.898	3.91769	7.71093	9.68295	2.03204	2.08662	8.94016	10.0874	15.8008	7.97935	10.7171	9.63923	14.3004	6.60753	7.78082	6.99126	4.27559	18		0	0	0	0	0.49079	0	0	0	0	0	0.0669421	0	0	0	0.249558	0	0	0	0
MSTRG.48631	lincRNA		LOC105035848	0 < FPKMmax < 1	1.64674	0.60686	0	0	0	0	0.944578	0	0	0.161712	0.105413	0.0933168	0.21165	0	0	0	1.64674	0	0	0	1		0	0	0	0	0	0.37138	0	0.403207	0.525941	0.066538	0.299533	0.237913	0.204521	0	0	0	0.20978	0.60686	0
MSTRG.48888	lincRNA		LOC105035919	-0.122959	17.8529	107.619	0.926281	0	0	0	0	0	0	0	0	0	0	0	0	17.8529	0	0	0	0	1		0.926281	90.9869	5.63087	107.619	50.0409	47.3276	46.4337	18.0271	21.7407	5.02548	8.95941	13.1358	20.6426	17.8529	35.2483	14.1303	33.4132	14.7283	17
MSTRG.49901	lincRNA		LOC105036161	0.142482	12.287	1.70777	2.59716	1.33518	12.287	3.309	5.02312	2.16849	5.23233	3.61477	2.67315	3.09184	3.08326	2.76453	2.06009	7.50662	2.50463	1.09886	5.38033	0	17		0	0.959833	0.54537	1.70777	0.971841	0.863407	1.0013	0.287486	1.19745	1.65664	0.191408	0.604617	0.506713	0.565057	0.398856	0.353193	1.66209	0	5
MSTRG.56087	lincRNA		LOC105037702	0 < FPKMmax < 1	0.160331	7.57505	0	0	0	0	0	0	0	0	0	0	0	0	0	0.160331	0	0	0	0	0		0	6.37615	0	7.57505	1.06086	0	0	2.06012	0.310344	0	0.832438	0.860204	1.00865	0	0	3.74753	1.88984	1.02914	8
MSTRG.892	NAT-lncRNA		LOC105041368	0.263989	78.9538	4.07479	54.2143	23.0095	7.99409	60.2846	78.9538	58.4026	35.863	32.9411	60.3092	13.9926	49.846	17.7245	41.0883	0	25.9322	49.5957	37.8759	11.1578	17		0	2.84433	0	2.74565	0	4.07479	0	0	0	0	1.70648	0	0	0	0	0	3.66448	0	5
MSTRG.1977	NAT-lncRNA		LOC105045663	-0.406716	67.7679	8.86723	3.05937	0.472021	67.7679	0.0841777	0	48.2182	25.6902	0.0265022	0	0	0	0	0	0	0.245469	0	1.49887	0.530328	5		3.05937	0	0	5.31118	2.76578	0.545084	0.718645	2.08662	2.79664	5.61904	2.68106	1.90729	5.99031	8.86723	0.717407	1.17457	1.27363	0.981472	12
MSTRG.3227	NAT-lncRNA		LOC105056965	-0.0924503	23.5407	2.13034	5.77457	4.78992	4.43366	7.31847	2.95552	23.5407	13.3588	8.20523	11.4807	1.45336	4.76798	1.55434	10.9761	1.47515	0	10.2966	3.96171	4.90462	17		0	0.324397	0	0	0	0	0	2.13034	0.89848	0.532096	0.416556	0.529746	0.65289	0.571305	0.594022	0	0	0.459851	1
MSTRG.4063	NAT-lncRNA		LOC105032768	-0.232428	9.04132	1.00663	3.53082	2.95714	1.06243	2.22399	1.55488	9.04132	8.1919	1.04589	1.21633	1.29223	0.795672	0.909475	1.21302	5.66782	0.219142	0.0925546	0.375618	0.236782	12		0	0	0	0	0.389084	0	0.122368	0	0.554714	0.819047	1.00663	0	0	0.273887	0	0.494701	0.319921	0	1
MSTRG.5276	NAT-lncRNA		LOC105038238	0 < FPKMmax < 1	8.7975	0.789297	0.0178627	0	0	0	0	0	0	0	8.7975	0	0	0	1.78518	0.0547274	0	5.81171	0	8.29714	4		0.0178627	0.108401	0	0.789297	0.131924	0.0208523	0.0467318	0.227266	0.415422	0.0164356	0	0.154948	0.0843503	0.0547274	0.451005	0.542293	0.292548	0.104508	0
MSTRG.5756	NAT-lncRNA		LOC105038594	not available	2.51343	0	0.951579	1.9947	0	0	0	0.944335	2.51343	0.739487	1.07115	0.690219	0.988687	0.15244	0.546148	0.933122	0.687411	0	0.226876	0	3		0	0	0	0	0	0	0	0	0	0	0	0	0	0	0	0	0	0	0
MSTRG.7968	NAT-lncRNA		LOC105040166	0.223788	1.27542	9.48203	1.27542	0.831498	0.6366	0.501324	0.538757	1.15669	0.722963	0.272223	0.442302	0.192487	0.349608	0.391902	0.466977	0	0.480935	0.665249	0.520262	0.334305	2		0	9.48203	0	0	2.59876	0	0	0	0	0	0	0	0	0	0	0	0	0	2
MSTRG.8710	NAT-lncRNA		LOC105040668	not available	32.5772	0	0.079174	0.469836	0	32.5772	17.4253	1.36928	2.08947	13.0242	21.56	0	11.5586	6.37697	25.2555	0	0	0.806433	5.57142	1.1944	11		0	0	0	0	0	0	0	0	0	0	0	0	0	0	0	0	0	0	0
MSTRG.8771	NAT-lncRNA		LOC105040716	-0.190323	230.341	4.17106	140.94	230.341	15.284	7.75738	12.4394	8.95732	12.0248	50.5366	65.6808	59.7846	61.9544	52.3607	36.2131	0	26.065	14.2515	36.2049	16.1845	17		0	0	0.20697	4.17106	0	0	0	0	0	0	0	0	0	0	0	0.274946	0	0	1
MSTRG.12125	NAT-lncRNA		LOC105042968	not available	31.3244	0	20.6267	31.3244	1.57178	4.21467	2.76592	1.74114	2.41606	2.84203	3.57675	5.1232	2.85882	3.85423	2.65614	0.714357	1.36908	2.81665	2.0465	0.478843	16		0	0	0	0	0	0	0	0	0	0	0	0	0	0	0	0	0	0	0
MSTRG.12975	NAT-lncRNA		LOC105043861	not available	0	0	0	0	0	0	0	0	0	0	0	0	0	0	0	0	0	0	0	0	0		0	0	0	0	0	0	0	0	0	0	0	0	0	0	0	0	0	0	0
MSTRG.13883	NAT-lncRNA		LOC105044290	not available	1.90178	0	0	0	0.149254	1.90178	0.500064	0	0	0	0	0	0.0420923	0.0574431	0.259036	0	0.144748	0	0	0	1		0	0	0	0	0	0	0	0	0	0	0	0	0	0	0	0	0	0	0
MSTRG.16321	NAT-lncRNA		LOC109505875	not available	5.18079	0	0	0.0866253	0	2.76211	5.18079	0.0885684	0.600576	0	0	0	0.0717657	0.0760145	0.196177	0	0.134506	0	0	0	2		0	0	0	0	0	0	0	0	0	0	0	0	0	0	0	0	0	0	0
MSTRG.16355	NAT-lncRNA		LOC105045793	not available	216.04	0	55.0783	27.9065	216.04	128.545	200.104	115.922	177.311	47.9157	39.0568	48.8729	20.7239	18.2656	36.191	0.0257831	15.0239	7.36586	16.8008	17.3876	17		0	0	0	0	0	0	0	0	0	0	0	0	0	0	0	0	0	0	0
MSTRG.16368	NAT-lncRNA		LOC105045786	0 < FPKMmax < 1	12.4662	0.622078	10.1806	0.985284	7.6774	12.4662	11.5076	8.44284	8.41353	0	0	7.06096	6.05077	5.70326	9.00631	2.53838	6.46163	0	11.2498	3.86324	14		0	0.36582	0	0	0	0	0.601629	0.622078	0	0.239344	0.280163	0	0	0	0	0	0	0	0
MSTRG.18156	NAT-lncRNA		LOC105047234	-0.0483807	5.28008	91.4321	0	2.1279	0	1.10521	0.782856	4.99393	5.28008	0	1.71095	0	0.873924	0.998293	1.92542	0	0	0	0.717073	0	6		0	0	0	73.2123	91.4321	0	0	0	0	0	0	0	0	0	0	0	0	0.505556	2
MSTRG.18348	NAT-lncRNA		LOC105047368	-0.0804243	37.7051	2.15255	0.0956578	3.85921	3.64076	3.02423	2.99372	4.49956	5.34165	2.08079	1.21961	2.1956	1.83934	1.23613	1.5418	37.7051	0.98561	5.42903	1.26436	1.47544	16		0.0956578	0.455086	0	0	0.230608	0	0	2.15255	0	0	0	0	0	0	0	0.309999	0	0	1
MSTRG.18545	NAT-lncRNA		LOC105047546	0.113953	44.6123	2.18334	0.625108	0.873021	0.226082	29.4832	22.5739	1.01972	1.09237	23.1801	16.8355	2.57942	9.29501	13.6083	24.5316	0	13.5539	41.0044	44.6123	20.1853	14		0	0	0	2.18334	0	1.19797	0	0	0	0	0	0	0	0	0	0	0	0	2
MSTRG.19796	NAT-lncRNA		LOC105048477	not available	4.17565	0	0.988724	0.462127	0.0494482	0.272044	0.200794	4.17565	2.16297	0.127376	0.443213	0.294451	0.219829	0	0.15094	0	0.101066	0	0.0780545	0	2		0	0	0	0	0	0	0	0	0	0	0	0	0	0	0	0	0	0	0
MSTRG.21976	NAT-lncRNA		LOC105049946	0 < FPKMmax < 1	9.8861	0.175836	1.09327	6.59578	0.511676	4.69708	0	0	1.97816	0	2.77738	4.42414	1.70435	4.43749	2.14064	9.8861	0	0	0	0	10		0	0.111381	0	0	0	0	0	0	0	0.0811814	0	0	0	0	0.175836	0	0	0	0
MSTRG.22518	NAT-lncRNA		LOC105050580	0.209327	3.25461	6.51283	0	0.316551	0	3.25461	1.12247	1.04338	0	1.27452	1.22652	0	0.128948	0	0.346962	0.458814	0	0.223416	0	0	5		0	1.43447	0	0	6.51283	0	0	0	1.43446	0	0	0	0	0.458814	0	0	0	0	3
MSTRG.24390	NAT-lncRNA		LOC105051871	not available	48.4307	0	18.8947	38.1747	8.43892	26.7652	24.9766	39.4844	47.7036	41.6924	29.5406	19.7511	27.2936	17.3943	24.6035	5.74382	10.3509	25.6451	48.4307	19.4097	18		0	0	0	0	0	0	0	0	0	0	0	0	0	0	0	0	0	0	0
MSTRG.25577	NAT-lncRNA		LOC105052790	0 < FPKMmax < 1	1.42531	0.78691	0.148324	0.308337	0.229761	0	0.219016	0	0	0	0	0	0	0.825166	0.339847	0.621351	0	1.42531	0.75457	0.496655	1		0	0.0209223	0	0.108228	0	0	0	0	0	0.0239116	0.0441164	0	0.0245512	0	0.78691	0.233147	0.0697176	0.317211	0
MSTRG.26191	NAT-lncRNA		LOC105052970	not available	23.1996	0	1.24332	11.6339	0	0.959531	6.84029	23.1996	16.6985	7.80052	4.87542	4.75075	3.42658	3.01182	5.23855	4.12437	7.75174	15.3508	8.85493	9.9587	16		0	0	0	0	0	0	0	0	0	0	0	0	0	0	0	0	0	0	0
MSTRG.29869	NAT-lncRNA		LOC105055774	-0.300737	43.0756	1.21702	4.18346	6.15324	17.8798	20.4954	12.9431	11.9643	22.794	43.0756	30.0077	21.5267	35.6629	23.1639	38.9122	28.9635	9.53473	13.8709	27.4977	1.60917	18		0	1.21702	0	0	0	0	0	0	0	0	0	0	0	0	0	0	0	0	1
MSTRG.32418	NAT-lncRNA		LOC105057746	0 < FPKMmax < 1	0.536267	2.85361	0.0728919	0	0	0.434746	0.536267	0	0.499767	0	0	0	0	0	0	0	0	0	0	0	0		0.0728919	0	0	0	0	0	0	0	0	0	0	0	0.263221	0	0	1.04302	2.85361	0	2
MSTRG.33228	NAT-lncRNA		LOC105058270	0.528407	12.6773	8.5607	0.0437585	0.181046	0.157765	0	0	0.187971	0	5.45326	0	0	3.82175	2.55928	0	2.87856	5.89962	0	12.6773	1.26942	7		0	0.265039	0.0910905	0	1.41689	0.21153	0	8.5607	3.41681	2.58235	2.00275	1.55093	4.41674	2.87856	1.63075	0	4.47405	1.02474	11
MSTRG.33465	NAT-lncRNA		LOC105058190	-0.137379	15.1305	11.3707	7.04734	7.27261	2.64845	8.64961	4.28306	12.7803	12.6112	8.52687	7.12755	8.86224	6.15195	6.51443	6.88682	2.40994	10.3153	13.2882	15.1305	6.55627	18		0	3.60416	0	11.3707	3.64877	0	0	5.2813	2.0718	0.176431	0.612957	1.29	2.69593	2.40994	1.71617	0	1.07901	0.916568	10
MSTRG.34288	NAT-lncRNA		LOC105058812	not available	42.1411	0	23.662	6.11887	13.0205	8.27985	4.11805	0	9.0596	24.4435	17.7654	17.2719	20.8105	17.3925	42.1411	19.6237	9.4635	21.233	33.2281	16.9465	17		0	0	0	0	0	0	0	0	0	0	0	0	0	0	0	0	0	0	0
MSTRG.34719	NAT-lncRNA		LOC105058893	0 < FPKMmax < 1	144.249	0.316668	44.5694	34.8312	144.249	0	65.3532	24.5833	62.8762	0.473377	0.617718	2.18883	3.04033	1.65151	4.1146	0.427607	1.21429	0.714475	0	0.403138	11		0	0	0	0	0	0	0.116359	0	0	0	0	0	0	0	0.316668	0	0.144506	0	0
MSTRG.35147	NAT-lncRNA		LOC105059438	not available	7.88952	0	0	0	0	0	0	0	0	0	0	1.43773	0	0	1.42922	7.88952	0	0	0	3.72201	4		0	0	0	0	0	0	0	0	0	0	0	0	0	0	0	0	0	0	0
MSTRG.35578	NAT-lncRNA		LOC105059697	not available	134.719	0	69.1274	24.3857	8.19838	91.5526	134.719	89.1889	111.051	70.7093	67.0332	81.8957	89.097	76.0566	77.1181	1.57921	8.40776	10.3363	15.6992	5.16957	18		0	0	0	0	0	0	0	0	0	0	0	0	0	0	0	0	0	0	0
MSTRG.35835	NAT-lncRNA		LOC105059880	0 < FPKMmax < 1	33.3444	0.621872	17.5388	13.9515	4.97456	0.912177	1.49123	17.6263	33.3444	8.45585	10.3061	8.24378	8.70259	6.11701	9.78323	3.26093	4.3716	12.2283	4.45239	12.8877	17		0	0	0	0.25893	0.258124	0.621872	0	0	0	0	0	0	0	0	0.424779	0	0	0	0
MSTRG.36276	NAT-lncRNA		LOC105060174	0 < FPKMmax < 1	31.3796	0.0886927	10.8485	1.77983	3.74865	23.2023	31.3796	3.08148	7.58662	8.51358	12.4242	10.8684	7.45592	8.02025	10.7411	0	2.21768	3.94561	4.67075	1.30484	17		0	0.0886927	0	0	0	0	0	0	0	0	0	0	0	0	0	0	0	0	0
MSTRG.36420	NAT-lncRNA		LOC105060254	not available	22.6546	0	8.87129	11.6199	5.91075	0	0	15.4084	17.7544	20.29	22.6546	14.7496	14.5417	12.6846	14.7246	14.309	9.71838	19.4382	14.6314	7.98467	16		0	0	0	0	0	0	0	0	0	0	0	0	0	0	0	0	0	0	0
MSTRG.37579	NAT-lncRNA		LOC105061003	0 < FPKMmax < 1	16.1297	0.48678	3.6494	3.00213	0.875488	0	0	6.54486	0	16.1297	10.8348	0	12.1637	0	0	0	4.07676	0	5.59149	0	8		0	0.234768	0	0	0	0.462272	0.0544996	0	0.156632	0	0.0418985	0.0454386	0.121549	0	0.425742	0.48678	0.278427	0.306495	0
MSTRG.37859	NAT-lncRNA		LOC105061171	0 < FPKMmax < 1	42.8672	0.161625	0	6.25416	1.07906	0	0	42.8672	0	0	0	0	0	0	0	4.96233	0	0	4.2722	0	5		0	0	0	0	0	0	0	0	0	0.161625	0	0	0	0	0	0	0	0	0
MSTRG.41131	NAT-lncRNA		LOC105033162	not available	36.8533	0	30.8862	36.8533	2.9724	0	0	2.75912	2.25991	0	1.37529	6.79131	2.77722	0.721146	2.27821	14.8985	2.33312	0.617993	0.677149	0.155358	11		0	0	0	0	0	0	0	0	0	0	0	0	0	0	0	0	0	0	0
MSTRG.42622	NAT-lncRNA		LOC105033947	not available	9.92476	0	0.373186	0.25468	0.123538	0.309294	0.325695	0	0.224283	0.10931	0.0532906	0.489198	0.793732	0	0	9.92476	0	0	2.67072	0	2		0	0	0	0	0	0	0	0	0	0	0	0	0	0	0	0	0	0	0
MSTRG.43297	NAT-lncRNA		LOC105034192	not available	20.8672	0	10.2248	20.8672	0.873706	4.58263	3.26876	1.17111	1.65014	9.4529	9.70514	6.9083	8.39616	8.94536	8.08429	1.99493	2.60925	3.3828	7.37677	3.11558	17		0	0	0	0	0	0	0	0	0	0	0	0	0	0	0	0	0	0	0
MSTRG.16686	Sense-lncRNA		LOC105046379	not available	0.518868	0	0.0262424	0.286019	0	0	0.518868	0.123404	0.10384	0	0	0	0.0533386	0.0849357	0.0984449	0	0.237701	0.120333	0	0.102761	0		0	0	0	0	0	0	0	0	0	0	0	0	0	0	0	0	0	0	0
MSTRG.19501	Sense-lncRNA		LOC105048254	not available	46.7182	0	15.467	11.8184	6.31012	15.7554	24.5965	16.5887	25.3931	19.7334	27.3627	31.1476	20.5761	18.7653	24.421	46.7182	9.99048	16.1746	17.8217	8.51659	18		0	0	0	0	0	0	0	0	0	0	0	0	0	0	0	0	0	0	0
MSTRG.24992	Sense-lncRNA		LOC105052057	not available	30.2837	0	0.079731	0.72156	0	30.2837	0	0.195203	1.63174	0	0	0	0	0	0	0.994019	3.71035	9.52685	11.1241	0	5		0	0	0	0	0	0	0	0	0	0	0	0	0	0	0	0	0	0	0
MSTRG.39993	Sense-lncRNA		LOC105032629	not available	22.2478	0	22.2478	9.21883	0	5.62131	8.78164	12.8851	21.6029	12.7216	13.0237	12.3612	11.3785	4.48446	8.82154	0	8.48514	13.408	0	7.83418	15		0	0	0	0	0	0	0	0	0	0	0	0	0	0	0	0	0	0	0
MSTRG.40912	Sense-lncRNA		LOC105033064	0.292454	1.15394	2.0394	1.15394	0.0714412	1.06606	0.0368842	0	0.313225	0.117199	0	0	0	0	0	0	0	0.107152	0.0452468	0	0	2		1.15394	2.0394	0.720695	0.886173	0	1.84078	1.68085	0	0	1.33564	0.450231	0	0.181556	0	0.733621	0.617487	0.327289	0.120724	5
* Low expression means that either lncRNA loci or target genes have low (FPKMmax<1) or no expression.
