# Supplementary material for: Genome-wide discovery and characterization of long noncoding RNAs in African oil palm (Elaeis guineensis Jacq.)
Source: PeerJ. 2020 Nov 2;8:e9585. doi: 10.7717/peerj.9585 (PMC7643553; doi:10.7717/peerj.9585)
Supplement: Supplemental Information 9 — **represents the p value of pearson correlation coefficient was lower than 0.01. [file peerj-08-9585-s009.xlsx]

## Sheet: Table S8
Table S8 Coexpressed gene pairs between genes related to fatty acid synthesis and lncRNAs associated with the fatty acid compostion. **represents the p value of pearson correlation coefficient was lower than 0.01.
LncRNA	Gene name	Gene ID	Gene annotation	Pearson correlation coefficient	P value	Pathway	FPKM values for protein-coding genes																		Target genes		FPKM values for lncRNA loci																		LncRNA loci
							DRR053156	DRR053157	ERR1735779	SRR7812013	SRR7812014	SRR5189966	SRR5189969	ERR3385821	ERR3385822	ERR3385823	ERR3385824	ERR3385825	ERR3385826	ERR3385828	ERR1413765	ERR1413766	ERR1413767	ERR1413768	No. transcriptomes (FPKM ≥1)		DRR053156	DRR053157	ERR1735779	SRR7812013	SRR7812014	SRR5189966	SRR5189969	ERR3385821	ERR3385822	ERR3385823	ERR3385824	ERR3385825	ERR3385826	ERR3385828	ERR1413765	ERR1413766	ERR1413767	ERR1413768	No. transcriptomes (FPKM ≥1)
MSTRG.2123	EgACC(CTα-2)	LOC105054827	Carboxyltransferase- alpha; Subunit of Heteromeric ACCase	.651**	0.00341996	Plastid Fatty Acid Synthesis from Pyruvate	71.0371	12.592	49.8095	40.9319	58.9118	28.1614	43.4532	169.333	141.347	53.4057	125.994	99.4796	218.137	67.8298	56.3577	66.7027	307.169	0	17		0	0	0	0	0	0	0	0	0	0	0	0	2.77324	0	0	0	1.42938	0.549461	2
MSTRG.2123	EgACC(CTα-3)	LOC105050555	Carboxyltransferase- alpha; Subunit of Heteromeric ACCase	.833**	1.79118e-05	Plastid Fatty Acid Synthesis from Pyruvate	0.0310101	0.150606	0.0188304	0.559998	1.36712	1.54788	1.08857	10.635	22.5724	0.0428804	14.1071	10.5057	43.225	0.126872	0.185698	1.9497	32.1266	1.00751	11		0	0	0	0	0	0	0	0	0	0	0	0	2.77324	0	0	0	1.42938	0.549461	2
MSTRG.2123	EgACC(CTβ)	accD	Carboxyltransferase-beta; Subunit of Heteromeric ACCase	.662**	0.00274668	Plastid Fatty Acid Synthesis from Pyruvate	0	0.525675	33.7938	0	0	1.79527	6.38318	34.363	0	3.48557	22.1575	0	69.3134	0	0	44.4007	62.2685	90.5902	10		0	0	0	0	0	0	0	0	0	0	0	0	2.77324	0	0	0	1.42938	0.549461	2
MSTRG.2123	EgACP4-1	LOC105057703	Acyl Carrier Protein	.711**	0.000948865	Plastid Fatty Acid Synthesis from Pyruvate	206.567	125.746	226.532	150.454	164.863	366.588	434.408	881.892	4110.18	220.736	5564.76	1564.19	6750.47	315.032	325.745	490.989	5579.07	298.77	18		0	0	0	0	0	0	0	0	0	0	0	0	2.77324	0	0	0	1.42938	0.549461	2
MSTRG.2123	EgACP4-3	LOC105032101	Acyl Carrier Protein	.730**	0.000577227	Plastid Fatty Acid Synthesis from Pyruvate	1.03276	15.3474	4.03997	2.93851	9.95709	32.66	52.0694	73.7342	236.46	1.58211	261.233	191.727	401.53	11.9789	23.7431	45.5979	523.603	40.4438	18		0	0	0	0	0	0	0	0	0	0	0	0	2.77324	0	0	0	1.42938	0.549461	2
MSTRG.2123	EgER	LOC105050202	Enoyl-ACP Reductase	.650**	0.0034924	Plastid Fatty Acid Synthesis from Pyruvate	57.3424	14.5641	13.9776	36.7803	47.3756	30.2133	49.2949	309.984	564.852	42.072	836.223	441.544	880.407	79.0187	58.1135	38.3351	909.394	79.8729	18		0	0	0	0	0	0	0	0	0	0	0	0	2.77324	0	0	0	1.42938	0.549461	2
MSTRG.2123	EgFAD2	LOC105050201	Oleate Desaturase	.664**	0.00267616	TAG synthesis	26.2464	282.727	72.7317	241.158	143.549	60.1177	90.2068	458.299	341.82	13.2582	1490.88	640.572	1929.77	44.5859	64.0862	114.124	424.26	52.0081	18		0	0	0	0	0	0	0	0	0	0	0	0	2.77324	0	0	0	1.42938	0.549461	2
MSTRG.2123	EgHAD	LOC105051936	3-Hydroxyacyl-ACP Dehydratase	.675**	0.00212302	Plastid Fatty Acid Synthesis from Pyruvate	76.2609	18.4817	32.1475	26.5946	33.3502	72.0065	95.8051	272.715	437.206	65.286	552.471	324.059	653.334	82.3097	90.9176	80.8543	632.755	112.348	18		0	0	0	0	0	0	0	0	0	0	0	0	2.77324	0	0	0	1.42938	0.549461	2
MSTRG.2123	EgOleosin-7	LOC105047513	Oleosin	.830**	2.00112e-05	TAG synthesis	0.186734	0.783835	0.298667	0.301864	0.340588	7.53328	4.2389	2.53603	3.19633	0	5.76892	1.8406	16.7197	0.123576	0.344956	0.196126	7.93655	0.123971	8		0	0	0	0	0	0	0	0	0	0	0	0	2.77324	0	0	0	1.42938	0.549461	2
MSTRG.2123	EgPDH(E2-1)	LOC105038468	Dihydrolipoamide Acetyltransferase, E2 component of Pyruvate Dehydrogenase Complex	.686**	0.00167146	Plastid Fatty Acid Synthesis from Pyruvate	10.5856	2.343	14.1196	16.0679	20.6355	30.2805	24.7006	33.3332	71.6398	9.83325	82.1386	43.2049	109.487	13.3079	9.28914	8.89392	74.1621	9.79791	18		0	0	0	0	0	0	0	0	0	0	0	0	2.77324	0	0	0	1.42938	0.549461	2
MSTRG.2123	EgSAD-2	LOC105048931	Stearoyl-ACP Desaturase	.614**	0.00667739	Plastid Fatty Acid Synthesis from Pyruvate	115.455	81.393	65.6552	44.9167	69.189	339.723	358.133	550.635	558.525	177.202	406.9	296.24	1230.51	288.647	86.597	806.169	260.437	124.646	18		0	0	0	0	0	0	0	0	0	0	0	0	2.77324	0	0	0	1.42938	0.549461	2
MSTRG.13525	EgACC(BC-1)	LOC105049274	Biotin Carboxylase of Heteromeric ACCase	.640**	0.00419261	Plastid Fatty Acid Synthesis from Pyruvate	0	0	0	0	0	0	0	0	0	0	0	0	0	0	0	4.31924	0	0	1		0	0	0	0	0	0	0	0	0	0	0	0	0	0	0	1.35653	0	1.522	2
MSTRG.13525	EgACC(CTβ)	accD	Carboxyltransferase-beta; Subunit of Heteromeric ACCase	.608**	0.00744246	Plastid Fatty Acid Synthesis from Pyruvate	0	0.525675	33.7938	0	0	1.79527	6.38318	34.363	0	3.48557	22.1575	0	69.3134	0	0	44.4007	62.2685	90.5902	10		0	0	0	0	0	0	0	0	0	0	0	0	0	0	0	1.35653	0	1.522	2
MSTRG.15295	EgACC(CTα-1)	LOC105059024	Carboxyltransferase- alpha; Subunit of Heteromeric ACCase	.826**	2.45652e-05	Plastid Fatty Acid Synthesis from Pyruvate	0	0	0	0	0	1.84071	0.96145	9.78302	0	0	74.9875	0	0	0	0	0	0	0	3		0	0.408377	3.46066	0.984903	0	2.28771	0	7.98816	20.3302	0.343491	50.7543	13.1381	25.0574	0	1.83304	0.840129	3.28499	1.93881	10
MSTRG.15295	EgACP4-1	LOC105057703	Acyl Carrier Protein	.759**	0.000259996	Plastid Fatty Acid Synthesis from Pyruvate	206.567	125.746	226.532	150.454	164.863	366.588	434.408	881.892	4110.18	220.736	5564.76	1564.19	6750.47	315.032	325.745	490.989	5579.07	298.77	18		0	0.408377	3.46066	0.984903	0	2.28771	0	7.98816	20.3302	0.343491	50.7543	13.1381	25.0574	0	1.83304	0.840129	3.28499	1.93881	10
MSTRG.15295	EgACP4-2	LOC105045224	Acyl Carrier Protein	.795**	8.06019e-05	Plastid Fatty Acid Synthesis from Pyruvate	81.2377	97.302	22.1054	82.7341	80.9416	18.9694	30.5716	576.409	815.327	53.1779	688.263	491.967	855.481	132.379	37.56	139.544	333.044	68.9381	18		0	0.408377	3.46066	0.984903	0	2.28771	0	7.98816	20.3302	0.343491	50.7543	13.1381	25.0574	0	1.83304	0.840129	3.28499	1.93881	10
MSTRG.15295	EgDGAT2	LOC105052865	Acyl-CoA : Diacylglycerol Acyltransferase	.678**	0.00200137	TAG synthesis	10.3184	12.1528	8.40963	5.12449	9.30293	3.0659	4.8365	16.5257	34.9103	3.48924	21.3318	7.32238	35.5052	10.7042	1.57526	4.79649	7.9875	2.79055	18		0	0.408377	3.46066	0.984903	0	2.28771	0	7.98816	20.3302	0.343491	50.7543	13.1381	25.0574	0	1.83304	0.840129	3.28499	1.93881	10
MSTRG.15295	EgER	LOC105050202	Enoyl-ACP Reductase	.750**	0.000337974	Plastid Fatty Acid Synthesis from Pyruvate	57.3424	14.5641	13.9776	36.7803	47.3756	30.2133	49.2949	309.984	564.852	42.072	836.223	441.544	880.407	79.0187	58.1135	38.3351	909.394	79.8729	18		0	0.408377	3.46066	0.984903	0	2.28771	0	7.98816	20.3302	0.343491	50.7543	13.1381	25.0574	0	1.83304	0.840129	3.28499	1.93881	10
MSTRG.15295	EgFAD2	LOC105050201	Oleate Desaturase	.833**	1.79308e-05	TAG synthesis	26.2464	282.727	72.7317	241.158	143.549	60.1177	90.2068	458.299	341.82	13.2582	1490.88	640.572	1929.77	44.5859	64.0862	114.124	424.26	52.0081	18		0	0.408377	3.46066	0.984903	0	2.28771	0	7.98816	20.3302	0.343491	50.7543	13.1381	25.0574	0	1.83304	0.840129	3.28499	1.93881	10
MSTRG.15295	EgFATA	LOC105048939	Acyl-ACP Thioesterase A	.796**	7.83231e-05	Plastid Fatty Acid Synthesis from Pyruvate	32.6392	22.261	20.9962	23.3324	28.1668	19.8071	18.7483	112.826	146.033	34.9473	154.005	79.2389	170.544	32.3256	18.4417	45.7673	121.099	25.3172	18		0	0.408377	3.46066	0.984903	0	2.28771	0	7.98816	20.3302	0.343491	50.7543	13.1381	25.0574	0	1.83304	0.840129	3.28499	1.93881	10
MSTRG.15295	EgHAD	LOC105051936	3-Hydroxyacyl-ACP Dehydratase	.729**	0.000604515	Plastid Fatty Acid Synthesis from Pyruvate	76.2609	18.4817	32.1475	26.5946	33.3502	72.0065	95.8051	272.715	437.206	65.286	552.471	324.059	653.334	82.3097	90.9176	80.8543	632.755	112.348	18		0	0.408377	3.46066	0.984903	0	2.28771	0	7.98816	20.3302	0.343491	50.7543	13.1381	25.0574	0	1.83304	0.840129	3.28499	1.93881	10
MSTRG.15295	EgKASI-1	LOC105040922	Ketoacyl-ACP synthase	.701**	0.00119494	Plastid Fatty Acid Synthesis from Pyruvate	0.368555	0.282089	0.284315	16.6187	55.3154	0.587338	0.320358	274.476	727.433	0.429174	443.273	172.02	548.728	5.75742	19.4674	202.754	424.273	94.0164	12		0	0.408377	3.46066	0.984903	0	2.28771	0	7.98816	20.3302	0.343491	50.7543	13.1381	25.0574	0	1.83304	0.840129	3.28499	1.93881	10
MSTRG.15295	EgKASI-2	LOC105053059	Ketoacyl-ACP synthase	.709**	0.000976626	Plastid Fatty Acid Synthesis from Pyruvate	17.567	7.69797	11.2279	29.1765	32.0077	17.4134	17.9494	102.11	140.365	23.1889	99.3017	77.2277	111.528	32.2204	15.2794	37.1381	83.1604	23.3846	18		0	0.408377	3.46066	0.984903	0	2.28771	0	7.98816	20.3302	0.343491	50.7543	13.1381	25.0574	0	1.83304	0.840129	3.28499	1.93881	10
MSTRG.15295	EgKASIII-1	LOC105058326	Ketoacyl-ACP synthase	.749**	0.000347824	Plastid Fatty Acid Synthesis from Pyruvate	20.9759	7.47466	11.2291	17.7981	24.427	15.0522	14.7454	42.5107	56.814	14.8492	52.5178	42.2272	62.6704	18.2078	11.7829	14.9992	46.6098	13.5219	18		0	0.408377	3.46066	0.984903	0	2.28771	0	7.98816	20.3302	0.343491	50.7543	13.1381	25.0574	0	1.83304	0.840129	3.28499	1.93881	10
MSTRG.15295	EgPDH (E1α)	LOC105059287	E1-alpha component of Pyruvate Dehydrogenase Complex	.691**	0.00150908	Plastid Fatty Acid Synthesis from Pyruvate	25.5942	28.0058	44.5912	67.615	74.9168	28.1751	44.6587	294.524	514.671	33.1351	447.315	240.016	391.578	95.4482	83.2038	116.429	524.828	176.461	18		0	0.408377	3.46066	0.984903	0	2.28771	0	7.98816	20.3302	0.343491	50.7543	13.1381	25.0574	0	1.83304	0.840129	3.28499	1.93881	10
MSTRG.15295	EgPDH (E1β-1)	LOC105059550	E1-beta component of Pyruvate Dehydrogenase Complex	.849**	8.17509e-06	Plastid Fatty Acid Synthesis from Pyruvate	150.499	27.2315	35.1589	40.6434	57.9603	39.661	34.0368	602.681	1191.74	115.43	1529.72	1372.43	1898.3	232.898	54.7791	127.384	326.679	48.9344	18		0	0.408377	3.46066	0.984903	0	2.28771	0	7.98816	20.3302	0.343491	50.7543	13.1381	25.0574	0	1.83304	0.840129	3.28499	1.93881	10
MSTRG.15295	EgPDH(E2-1)	LOC105038468	Dihydrolipoamide Acetyltransferase, E2 component of Pyruvate Dehydrogenase Complex	.769**	0.000192655	Plastid Fatty Acid Synthesis from Pyruvate	10.5856	2.343	14.1196	16.0679	20.6355	30.2805	24.7006	33.3332	71.6398	9.83325	82.1386	43.2049	109.487	13.3079	9.28914	8.89392	74.1621	9.79791	18		0	0.408377	3.46066	0.984903	0	2.28771	0	7.98816	20.3302	0.343491	50.7543	13.1381	25.0574	0	1.83304	0.840129	3.28499	1.93881	10
MSTRG.15295	EgPDH(E3)	LOC105039925	Dihydrolipoyl Dehydrogenase	.633**	0.00484871	Plastid Fatty Acid Synthesis from Pyruvate	34.9865	5.01737	6.61948	11.8782	22.2833	23.8671	18.1948	134.889	246.961	24.6581	226.235	177.949	223.937	39.604	39.0358	55.5934	338.072	58.1121	18		0	0.408377	3.46066	0.984903	0	2.28771	0	7.98816	20.3302	0.343491	50.7543	13.1381	25.0574	0	1.83304	0.840129	3.28499	1.93881	10
MSTRG.15295	EgSAD-1	LOC105049670	Stearoyl-ACP Desaturase	.592**	0.00970804	Plastid Fatty Acid Synthesis from Pyruvate	202.126	104.788	360.417	183.616	166.958	637.072	649.113	5704.76	2204.59	424.364	5155.55	1444.91	3243.43	724.872	177.967	5292.05	1719.75	430.611	18		0	0.408377	3.46066	0.984903	0	2.28771	0	7.98816	20.3302	0.343491	50.7543	13.1381	25.0574	0	1.83304	0.840129	3.28499	1.93881	10
MSTRG.15295	EgWRI1-1	LOC105046119	Ethylene-responsive transcription factor	.827**	2.28064e-05	Plastid Fatty Acid Synthesis from Pyruvate	0	0	0	1.33623	0	0	0	84.4213	255.306	0	238.515	177.104	284.897	26.6377	35.1758	5.36593	141.177	24.3311	11		0	0.408377	3.46066	0.984903	0	2.28771	0	7.98816	20.3302	0.343491	50.7543	13.1381	25.0574	0	1.83304	0.840129	3.28499	1.93881	10
MSTRG.16345	EgDGAT1-1	LOC105047643	Diacylglycerol O-acyltransferase	.999**	3.5343e-22	TAG synthesis	0.155391	42.9553	0	1.1262	1.26347	0.680373	0.445317	0.839127	1.02599	0.260437	0.868715	0	0.43732	0.342054	0.234542	0.554036	1.10521	1.94743	6		0	5.55358	0	0	0	0	0	0	0	0	0	0	0	0	0	0	0	0	1
MSTRG.16345	EgFATB3	LOC105047747	Acyl-ACP Thioesterase B	.997**	3.46046e-19	Plastid Fatty Acid Synthesis from Pyruvate	0	13.2048	0.296236	0	0.377103	0	0	0.0214301	0.134284	0	0	0	0	0	0	0.961203	0	0	1		0	5.55358	0	0	0	0	0	0	0	0	0	0	0	0	0	0	0	0	1
MSTRG.16345	EgLPAATB	LOC105035151	1-acyl-sn-glycerol-3-phosphate acyltransferase	.879**	1.53207e-06	TAG synthesis	3.32742	21.8557	2.24886	0.913868	2.74684	1.61844	0.725391	7.72578	9.74243	3.37572	2.8636	2.36517	0.54204	0.701014	0	2.8925	1.96496	1.66906	13		0	5.55358	0	0	0	0	0	0	0	0	0	0	0	0	0	0	0	0	1
MSTRG.16345	EgOleosin-3	LOC105033117	Oleosin	.997**	9.5313e-20	TAG synthesis	1.09467	24.4148	0.573569	1.50115	0.37676	0	0	0.104705	0.0546371	0.24195	0	0	0	0.202956	0	0.216717	0.197401	0.136669	3		0	5.55358	0	0	0	0	0	0	0	0	0	0	0	0	0	0	0	0	1
MSTRG.16345	EgOleosin-4	LOC105047088	Oleosin	.998**	5.9725e-20	TAG synthesis	3.30864	148.773	2.32369	3.78164	1.88829	0.708204	7.15368	5.81882	1.94775	1.45862	2.06796	1.35958	6.17352	1.91608	0	8.11257	1.35429	0	15		0	5.55358	0	0	0	0	0	0	0	0	0	0	0	0	0	0	0	0	1
MSTRG.17117	EgACC(BC-2)	LOC105050891	Biotin Carboxylase of Heteromeric ACCase	.884**	1.11174e-06	Plastid Fatty Acid Synthesis from Pyruvate	6.15602	0.657648	0	2.43865	0	0	0	0	0	0	0	0	0	0	0	34.6983	68.2514	0	4		0	0	0	0	0	0	0	0	0	0	0	0	0	0	0	0	2.46528	0	1
MSTRG.17117	EgACC(BCCP)	LOC105055979	Biotin Carboxyl Carrier Protein of Heteromeric ACCase	.990**	6.29659e-15	Plastid Fatty Acid Synthesis from Pyruvate	0	0	0	0	27.8009	0	0	0	0	0	0	0	0	6.18055	0	0	195.991	4.36318	4		0	0	0	0	0	0	0	0	0	0	0	0	0	0	0	0	2.46528	0	1
MSTRG.17117	EgACC(CTα-2)	LOC105054827	Carboxyltransferase- alpha; Subunit of Heteromeric ACCase	.699**	0.00126108	Plastid Fatty Acid Synthesis from Pyruvate	71.0371	12.592	49.8095	40.9319	58.9118	28.1614	43.4532	169.333	141.347	53.4057	125.994	99.4796	218.137	67.8298	56.3577	66.7027	307.169	0	17		0	0	0	0	0	0	0	0	0	0	0	0	0	0	0	0	2.46528	0	1
MSTRG.17117	EgACP4-3	LOC105032101	Acyl Carrier Protein	.675**	0.00213468	Plastid Fatty Acid Synthesis from Pyruvate	1.03276	15.3474	4.03997	2.93851	9.95709	32.66	52.0694	73.7342	236.46	1.58211	261.233	191.727	401.53	11.9789	23.7431	45.5979	523.603	40.4438	18		0	0	0	0	0	0	0	0	0	0	0	0	0	0	0	0	2.46528	0	1
MSTRG.17117	EgFATB1	PTE	Acyl-ACP Thioesterase B	.696**	0.00135121	Plastid Fatty Acid Synthesis from Pyruvate	20.0613	71.826	23.7638	64.3624	56.9392	27.8316	49.6283	47.7522	46.5842	22.0855	25.0869	15.3179	31.4532	14.7788	20.057	46.2355	111.021	57.5078	18		0	0	0	0	0	0	0	0	0	0	0	0	0	0	0	0	2.46528	0	1
MSTRG.17117	EgKAR	LOC105051367	Ketoacyl-ACP Reductase	.655**	0.00315028	Plastid Fatty Acid Synthesis from Pyruvate	86.1567	20.3331	28.3015	43.3065	77.2431	120.613	120.493	414.196	1193.16	92.4049	866.433	592.074	914.948	208.521	127.747	182.961	1597.85	179.023	18		0	0	0	0	0	0	0	0	0	0	0	0	0	0	0	0	2.46528	0	1
MSTRG.17117	EgLACS9	LOC105051934	Long-Chain Acyl-CoA Synthetase	.665**	0.00261007	TAG synthesis	22.4466	11.4049	9.48198	31.5512	33.9452	4.44122	17.1873	119.712	74.5739	117.146	150.256	105.209	165.747	189.821	82.7869	85.6486	290.565	53.044	18		0	0	0	0	0	0	0	0	0	0	0	0	0	0	0	0	2.46528	0	1
MSTRG.17117	EgPDH(E2-2)	LOC105051780	Dihydrolipoamide Acetyltransferase, E2 component of Pyruvate Dehydrogenase Complex	.590**	0.00988715	Plastid Fatty Acid Synthesis from Pyruvate	2.90231	0.927873	3.73068	0	18.5881	5.55904	4.79515	42.6312	130.962	4.74381	78.3115	84.4595	111.602	5.7937	18.0779	8.04413	159.56	10.6006	16		0	0	0	0	0	0	0	0	0	0	0	0	0	0	0	0	2.46528	0	1
MSTRG.17117	EgPDH(E3)	LOC105039925	Dihydrolipoyl Dehydrogenase	.591**	0.00986785	Plastid Fatty Acid Synthesis from Pyruvate	34.9865	5.01737	6.61948	11.8782	22.2833	23.8671	18.1948	134.889	246.961	24.6581	226.235	177.949	223.937	39.604	39.0358	55.5934	338.072	58.1121	18		0	0	0	0	0	0	0	0	0	0	0	0	0	0	0	0	2.46528	0	1
MSTRG.17644	EgACC(BC-2)	LOC105050891	Biotin Carboxylase of Heteromeric ACCase	.887**	9.44356e-07	Plastid Fatty Acid Synthesis from Pyruvate	6.15602	0.657648	0	2.43865	0	0	0	0	0	0	0	0	0	0	0	34.6983	68.2514	0	4		0.308541	0.484864	0	0	0	0	0	0	0	0	0	0.675656	0	0	0	0.852156	1.49753	0.200088	1
MSTRG.17644	EgACC(BCCP)	LOC105055979	Biotin Carboxyl Carrier Protein of Heteromeric ACCase	.747**	0.000363935	Plastid Fatty Acid Synthesis from Pyruvate	0	0	0	0	27.8009	0	0	0	0	0	0	0	0	6.18055	0	0	195.991	4.36318	4		0.308541	0.484864	0	0	0	0	0	0	0	0	0	0.675656	0	0	0	0.852156	1.49753	0.200088	1
MSTRG.30615	EgLACS9	LOC105051934	Long-Chain Acyl-CoA Synthetase	.621**	0.00592974	TAG synthesis	22.4466	11.4049	9.48198	31.5512	33.9452	4.44122	17.1873	119.712	74.5739	117.146	150.256	105.209	165.747	189.821	82.7869	85.6486	290.565	53.044	18		0.613822	0.36784	0.73295	3.07543	1.31423	0.168103	0.331224	0	8.28013	20.8665	6.50416	7.24949	6.98386	14.5015	5.43537	0	10.2301	3.53663	11
